# Supplementary material
Source: publisher figshare collection journal article supplement (https://acs.figshare.com/ndownloader/files/9547546)

# Supporting Information

## Gold-Catalyzed Ring-Expansion of Enyne-Lactone: Generation and Transformation of 2-Oxoninonium

Kui Luo,<sup>a</sup> Tongxiang Cao,<sup>a</sup> Huanfeng Jiang,<sup>a</sup> Lianfen Chen,<sup>\*,a</sup> and Shifa Zhu<sup>\*,a,b</sup>

<sup>a</sup> Key Laboratory of Functional Molecular Engineering of Guangdong Province, School of Chemistry and Chemical Engineering, South China University of Technology, Guangzhou, 510640, P. R. China

<sup>b</sup> State Key Laboratory of Elemento-Organic Chemistry, Nankai University, Tianjin, 300071, P. R. China

Corresponding author: [zhushf@scut.edu.cn](mailto:zhushf@scut.edu.cn); [chenlf@scut.edu.cn](mailto:chenlf@scut.edu.cn)

### Table of contents

|                                                                         |    |
|-------------------------------------------------------------------------|----|
| 1. Experimental procedures and spectroscopic data.....                  | 2  |
| 1.1 General information.....                                            | 2  |
| 1.2 Optimization of Reaction Conditions <sup>a</sup> .....              | 2  |
| 1.3 Preparation of substrates.....                                      | 3  |
| 1.4 General procedure for the synthesis of <b>3a</b> – <b>3aa</b> ..... | 14 |
| 1.5 General procedure for the synthesis of <b>4a</b> – <b>4e</b> .....  | 20 |
| 1.6 General procedure for the synthesis of <b>6</b> .....               | 22 |
| 1.7 Gram-scale reaction.....                                            | 22 |
| 1.8 General procedure for derivatization reaction of <b>3a</b> .....    | 22 |
| 1.9 The reaction of <b>1a</b> with methanol to form <b>12</b> .....     | 25 |
| 2. References: .....                                                    | 26 |
| 3. X-ray diffraction analysis .....                                     | 27 |
| 3.1 Crystal data and structure refinement for <b>1e</b> .....           | 27 |
| 3.2 Crystal data and structure refinement for <b>3u</b> .....           | 28 |
| 3.3 Crystal data and structure refinement for <b>4a</b> .....           | 29 |
| 4. Copies of NMR spectra .....                                          | 30 |

## 1. Experimental procedures and spectroscopic data

### 1.1 General information

All reactions were carried out under an inert atmosphere of dry N<sub>2</sub> in Schlenk tube. <sup>1</sup>H, <sup>13</sup>C, <sup>19</sup>F NMR spectra were recorded on a Bruker AVANCE 400 (400 MHz for <sup>1</sup>H; 100 MHz for <sup>13</sup>C; 376 MHz for <sup>19</sup>F), <sup>1</sup>H NMR and <sup>13</sup>C NMR chemical shifts were determined relative to internal standard TMS at  $\delta$  0.0 and <sup>19</sup>F NMR chemical shifts were determined relative to CFCI<sub>3</sub> as external standard. Chemical shifts ( $\delta$ ) are reported in ppm, and coupling constants (*J*) are in Hertz (Hz). The following abbreviations were used to explain the multiplicities: s = singlet, d = doublet, t = triplet, q = quartet, m = multiplet, br = broad. Infrared (IR) spectra are recorded on a Nicolet 210 spectrophotometer and were recorded in potassium bromide (KBr) pellet. Mass spectra (MS) were obtained using ESI, DART mass spectrometer. Melting points were determined using a hot stage apparatus. All reagents were used as received from commercial sources, unless specified otherwise, or prepared as described in the literature.

### 1.2 Optimization of Reaction Conditions<sup>a</sup>

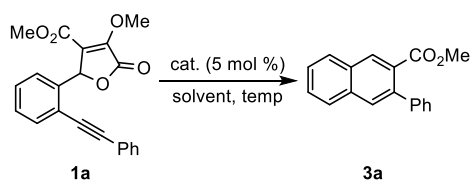

| entry                | cat.                                   | additive                 | solvent                         | temp (°C) | <b>3a</b> (%) <sup>b</sup> |
|----------------------|----------------------------------------|--------------------------|---------------------------------|-----------|----------------------------|
| 1                    | Ph <sub>3</sub> PAuCl                  | AgNTf <sub>2</sub>       | DCE                             | 80        | trace                      |
| 2                    | Ph <sub>3</sub> PAuCl                  | AgOTf                    | DCE                             | 80        | 34                         |
| 3                    | Ph <sub>3</sub> PAuCl                  | AgBF <sub>4</sub>        | DCE                             | 80        | 40                         |
| 4                    | Ph <sub>3</sub> PAuCl                  | AgSbF <sub>6</sub>       | DCE                             | 80        | 58                         |
| <b>5<sup>d</sup></b> | <b>Ph<sub>3</sub>PAuCl</b>             | <b>AgSbF<sub>6</sub></b> | <b>DCE</b>                      | <b>80</b> | <b>74<sup>e</sup></b>      |
| 6 <sup>e</sup>       | Ph <sub>3</sub> PAuCl                  | AgSbF <sub>6</sub>       | DCE                             | 80        | trace                      |
| 7 <sup>d</sup>       | IPrAuCl                                | AgSbF <sub>6</sub>       | DCE                             | 80        | 28                         |
| 8 <sup>d</sup>       | SIPrAuCl                               | AgSbF <sub>6</sub>       | DCE                             | 80        | 19                         |
| 9 <sup>d</sup>       | IMesAuCl                               | AgSbF <sub>6</sub>       | DCE                             | 80        | 11                         |
| 10 <sup>d</sup>      | SIMesAuCl                              | AgSbF <sub>6</sub>       | DCE                             | 80        | 14                         |
| 11 <sup>d</sup>      | ( <i>p</i> -F-Ph) <sub>3</sub> PAuCl   | AgSbF <sub>6</sub>       | DCE                             | 80        | trace                      |
| 12 <sup>d</sup>      | ( <i>p</i> -OMe-Ph) <sub>3</sub> PAuCl | AgSbF <sub>6</sub>       | DCE                             | 80        | trace                      |
| 13 <sup>d</sup>      | JohnPhosAuCl                           | AgSbF <sub>6</sub>       | DCE                             | 80        | 10                         |
| 14 <sup>d</sup>      | Ph <sub>3</sub> PAuCl                  | AgSbF <sub>6</sub>       | CH <sub>2</sub> Cl <sub>2</sub> | 80        | 55                         |
| 15 <sup>d</sup>      | Ph <sub>3</sub> PAuCl                  | AgSbF <sub>6</sub>       | THF                             | 80        | <5                         |
| 16 <sup>d</sup>      | Ph <sub>3</sub> PAuCl                  | AgSbF <sub>6</sub>       | CH <sub>3</sub> CN              | 80        | n.d.                       |
| 17 <sup>d</sup>      | Ph <sub>3</sub> PAuCl                  | AgSbF <sub>6</sub>       | toluene                         | 80        | <5                         |
| 18 <sup>d</sup>      | Ph <sub>3</sub> PAuCl                  | AgSbF <sub>6</sub>       | DCE                             | 40        | 47                         |
| 19 <sup>d</sup>      | Ph <sub>3</sub> PAuCl                  | AgSbF <sub>6</sub>       | DCE                             | 60        | 63                         |
| 20 <sup>d</sup>      | Ph <sub>3</sub> PAuCl                  | AgSbF <sub>6</sub>       | DCE                             | 100       | 46                         |
| 21 <sup>d</sup>      | -                                      | AgSbF <sub>6</sub>       | DCE                             | 80        | <10                        |
| 22 <sup>d</sup>      | -                                      | -                        | DCE                             | 80        | n.r.                       |

<sup>a</sup> The reactions were carried out employing **1a** (0.2 mmol) as substrates in the presence of Ph<sub>3</sub>PAuCl (5 mol %) and AgSbF<sub>6</sub> (5 mol %) in DCE (2 mL) at 80 °C for 12 h in a sealed reaction tube under N<sub>2</sub> atmosphere. <sup>b</sup> The yield was determined by <sup>1</sup>H NMR using 1-methyl-4-nitrobenzene as an internal standard. <sup>c</sup> Isolated yield. <sup>d</sup> 1.0 equiv H<sub>2</sub>O. <sup>e</sup> 100 mg 4 Å MS.

## 1.3 Preparation of substrates

### 1.3.1 General procedure for 1a – 1aa

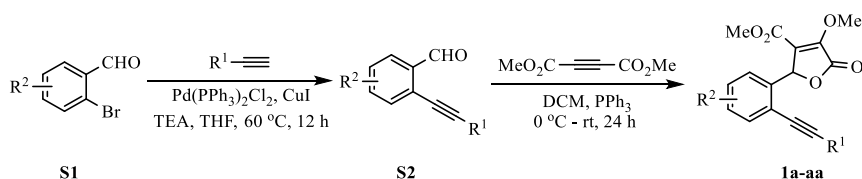

**Step 1:** Procedure for the synthesis of **S2** was identical to the literature.<sup>1</sup>

**Step 2:** To a magnetically stirred solution of **S2** (1.0 equiv) in dry DCM was added triphenylphosphine (1.2 equiv) at 0 °C under nitrogen atmosphere. After stirred for 5 min, the DCM solution of dimethyl acetylenedicarboxylate (1.2 equiv) was added dropwise. The mixture was allowed to stand at room temperature for 24 h. After the reaction was finished, the solvent was removed under reduced pressure and the residue was purified by flash chromatography on silica gel to afford the desired product **1a-aa**.<sup>2</sup>

#### Methyl 4-methoxy-5-oxo-2-(2-(phenylethynyl)phenyl)-2,5-dihydrofuran-3-carboxylate (**1a**)

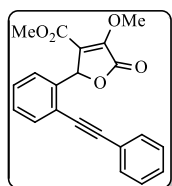

Yellow viscous oil, purified by chromatography (petroleum/ethyl acetate = 5/1),  $R_f$  = 0.3, 450 mg, yield = 53% (2 steps); <sup>1</sup>H NMR (400 MHz, CDCl<sub>3</sub>)  $\delta$  7.60 – 7.52 (m, 3H), 7.35 (m, 5H), 7.21 (d,  $J$  = 7.0 Hz, 1H), 6.52 (s, 1H), 4.24 (s, 3H), 3.66 (s, 3H); <sup>13</sup>C NMR (100 MHz, CDCl<sub>3</sub>)  $\delta$  166.9, 161.5, 148.9, 135.5, 133.5, 131.8, 129.4, 128.8, 128.7, 128.5, 127.6, 123.5, 122.8, 121.8, 95.3, 86.4, 78.4, 60.3, 52.2; IR (KBr, cm<sup>-1</sup>) 3065, 3014, 2954, 2857, 2362, 2215, 1780, 1716, 1658, 1497, 1447, 1387, 1304, 1233, 1163, 1114, 990, 913, 824, 763, 691, 622, 548, 490; HRMS (ESI) Calcd for C<sub>21</sub>H<sub>16</sub>NaO<sub>5</sub> (M+Na)<sup>+</sup> 371.0890, found 371.0892.

#### Methyl 4-methoxy-5-oxo-2-(2-(p-tolyethynyl)phenyl)-2,5-dihydrofuran-3-carboxylate (**1b**)

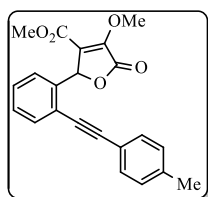

Yellow solid, m.p. = 96-97 °C, purified by chromatography (petroleum/ethyl acetate = 5/1),  $R_f$  = 0.3, 265 mg, yield = 32% (2 steps); <sup>1</sup>H NMR (400 MHz, CDCl<sub>3</sub>)  $\delta$  7.56 (dd,  $J$  = 7.4, 1.5 Hz, 1H), 7.43 (d,  $J$  = 8.1 Hz, 2H), 7.37 – 7.30 (m, 2H), 7.21 – 7.16 (m, 3H), 6.52 (s, 1H), 4.24 (s, 3H), 3.65 (s, 3H), 2.37 (s, 3H); <sup>13</sup>C NMR (100 MHz, CDCl<sub>3</sub>)  $\delta$  167.0, 161.6, 148.9, 139.1, 135.4, 133.4, 131.7, 129.4, 129.3, 128.6, 127.6, 123.8, 121.9, 119.8, 95.6, 85.8, 78.4, 60.3, 52.2, 21.7; IR (KBr, cm<sup>-1</sup>) 2954, 2362, 1776, 1717, 1657, 1512, 1448, 1386, 1303, 1229, 1163, 1114, 991, 819, 763, 500; HRMS (ESI) Calcd for C<sub>22</sub>H<sub>18</sub>NaO<sub>5</sub> (M+Na)<sup>+</sup> 385.1046, found 385.1048.

#### Methyl 2-(2-((4-ethylphenyl)ethynyl)phenyl)-4-methoxy-5-oxo-2,5-dihydrofuran-3-carboxylate (**1c**)

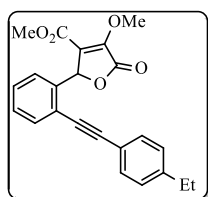

Yellow solid, m.p. = 91-92 °C, purified by chromatography (petroleum/ethyl acetate = 5/1),  $R_f$  = 0.3, 305 mg, yield = 38% (2 steps); <sup>1</sup>H NMR (400 MHz, CDCl<sub>3</sub>)  $\delta$  7.57 (dd,  $J$  = 7.4, 1.6 Hz, 1H), 7.47 (d,  $J$  = 8.2 Hz, 2H), 7.38 – 7.30 (m, 2H), 7.19 (d,  $J$  = 8.2 Hz, 3H), 6.53 (s, 1H), 4.24 (s, 3H), 3.66 (s, 3H), 2.67 (q,  $J$  = 7.6 Hz, 2H), 1.24 (t,  $J$  = 7.6 Hz, 3H); <sup>13</sup>C NMR (100 MHz, CDCl<sub>3</sub>)  $\delta$  167.0, 161.5, 148.9, 145.4, 135.4, 133.4, 131.8, 129.4, 128.6, 128.1, 127.5, 123.8, 121.9, 120.0, 95.6, 85.8, 78.4, 60.4, 52.2, 29.0, 15.5; IR (KBr, cm<sup>-1</sup>) 2962, 2864, 2362, 2214, 1779, 1717, 1657, 1512,

1449, 1386, 1304, 1228, 1163, 1114, 990, 833, 763, 555, 495; **HRMS** (ESI) Calcd for  $C_{23}H_{20}NaO_5$  ( $M+Na$ )<sup>+</sup> 399.1203, found 399.1208.

**Methyl 2-(2-((4-(tert-butyl)phenyl)ethynyl)phenyl)-4-methoxy-5-oxo-2,5-dihydrofuran-3-carboxylate (1d)**

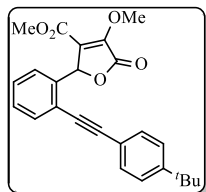

White solid, m.p. = 134-135 °C, purified by chromatography (petroleum/ethyl acetate = 5/1),  $R_f$  = 0.3, 385 mg, yield = 50% (2 steps); **<sup>1</sup>H NMR** (400 MHz,  $CDCl_3$ )  $\delta$  7.59 – 7.56 (m, 1H), 7.50 – 7.47 (m, 2H), 7.40 – 7.37 (m, 2H), 7.36 – 7.30 (m, 2H), 7.21 – 7.18 (m, 1H), 6.53 (s, 1H), 4.25 (s, 3H), 3.66 (s, 3H), 1.33 (s, 9H); **<sup>13</sup>C NMR** (100 MHz,  $CDCl_3$ )  $\delta$  167.0, 161.6, 152.2, 148.9, 135.4, 133.4, 131.5, 129.4, 128.6, 127.5, 125.6, 123.9, 121.9, 119.8, 95.5, 85.8, 78.4, 60.4, 52.2, 35.0, 31.3; **IR** (KBr,  $cm^{-1}$ ) 3117, 3014, 2947, 2826, 2362, 2308, 2247, 2180, 1779, 1672, 1583, 1421, 1336, 1278, 1189, 1125, 992, 949, 893, 831, 777, 725, 635, 579; **HRMS** (ESI) Calcd for  $C_{25}H_{24}NaO_5$  ( $M+Na$ )<sup>+</sup> 427.1516, found 427.1514.

**Methyl 4-methoxy-2-(2-((4-methoxyphenyl)ethynyl)phenyl)-5-oxo-2,5-dihydrofuran-3-carboxylate (1e)**

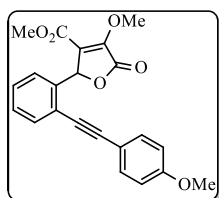

White solid, m.p. = 109-110 °C, purified by chromatography (petroleum/ethyl acetate = 5/1),  $R_f$  = 0.4, 280 mg, yield = 35% (2 steps); **<sup>1</sup>H NMR** (400 MHz,  $CDCl_3$ )  $\delta$  7.55 (dd,  $J$  = 7.5, 1.5 Hz, 1H), 7.50 – 7.46 (m, 2H), 7.37 – 7.28 (m, 2H), 7.19 (dd,  $J$  = 7.6, 1.4 Hz, 1H), 6.91 – 6.87 (m, 2H), 6.50 (s, 1H), 4.24 (s, 3H), 3.83 (s, 3H), 3.66 (s, 3H); **<sup>13</sup>C NMR** (100 MHz,  $CDCl_3$ )  $\delta$  167.0, 161.6, 160.1, 148.9, 135.2, 133.4, 133.3, 129.4, 128.4, 127.7, 123.9, 121.8, 114.9, 114.2, 95.4, 85.2, 78.6, 60.3, 55.5, 52.2; **IR** (KBr,  $cm^{-1}$ ) 3118, 3011, 2949, 2834, 2362, 2250, 2174, 1780, 1718, 1659, 1602, 1512, 1462, 1382, 1290, 1245, 1181, 1116, 990, 893, 832, 775, 727, 634, 542; **HRMS** (ESI) Calcd for  $C_{22}H_{18}NaO_6$  ( $M+Na$ )<sup>+</sup> 401.0996, found 401.0999.

**Methyl 2-(2-((4-fluorophenyl)ethynyl)phenyl)-4-methoxy-5-oxo-2,5-dihydrofuran-3-carboxylate (1f)**

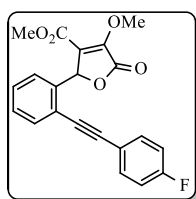

Yellow viscous oil, purified by chromatography (petroleum/ethyl acetate = 5/1), 317 mg,  $R_f$  = 0.3, yield = 39% (2 steps); **<sup>1</sup>H NMR** (400 MHz,  $CDCl_3$ )  $\delta$  7.58 – 7.51 (m, 3H), 7.39 – 7.31 (m, 2H), 7.24 – 7.20 (m, 1H), 7.09 – 7.03 (m, 2H), 6.47 (s, 1H), 4.24 (s, 3H), 3.66 (s, 3H); **<sup>13</sup>C NMR** (100 MHz,  $CDCl_3$ )  $\delta$  166.9, 162.8 (d,  $J$  = 250.0 Hz), 161.5, 149.0, 135.4, 133.7 (d,  $J$  = 8.4 Hz), 133.6, 129.5, 128.8, 127.9, 123.3, 121.7, 118.9 (d,  $J$  = 3.4 Hz), 115.9 (d,  $J$  = 22.0 Hz), 94.2, 86.1, 78.5, 60.3, 52.2; **<sup>19</sup>F NMR** (376 MHz,  $CDCl_3$ )  $\delta$  -110.1; **IR** (KBr,  $cm^{-1}$ ) 3067, 2957, 2856, 2363, 2216, 1778, 1718, 1658, 1597, 1509, 1449, 1387, 1303, 1229, 1160, 1113, 991, 837, 764, 499; **HRMS** (ESI) Calcd for  $C_{21}H_{16}FO_5$  ( $M+H$ )<sup>+</sup> 367.0976, found 367.0981.

**Methyl 2-(2-((4-chlorophenyl)ethynyl)phenyl)-4-methoxy-5-oxo-2,5-dihydrofuran-3-carboxylate (1g)**

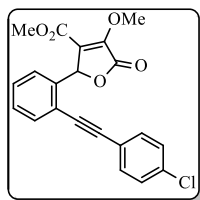

White solid, m.p. = 86-87 °C, purified by chromatography (petroleum/ethyl acetate = 5/1),  $R_f$  = 0.3, 210 mg, yield = 26% (2 steps);  $^1\text{H NMR}$  (400 MHz,  $\text{CDCl}_3$ )  $\delta$  7.59 – 7.55 (m, 1H), 7.49 – 7.46 (m, 2H), 7.37 – 7.32 (m, 4H), 7.24 – 7.20 (m, 1H), 6.46 (s, 1H), 4.24 (s, 3H), 3.66 (s, 3H);  $^{13}\text{C NMR}$  (100 MHz,  $\text{CDCl}_3$ )  $\delta$  166.9, 161.5, 149.0, 135.5, 134.9, 133.6, 133.0, 129.5, 129.0, 128.9, 127.9, 123.2, 121.7, 121.3, 94.1, 87.4, 78.5, 60.4, 52.2; **IR** (KBr,  $\text{cm}^{-1}$ ) 3114, 3012, 2947, 2887, 2826, 2361, 2306, 2247, 2180, 1788, 1663, 1583, 1497, 1423, 1336, 1278, 1188, 1130, 992, 942, 893, 830, 777, 726, 634, 581; **HRMS** (ESI) Calcd for  $\text{C}_{21}\text{H}_{15}\text{ClNaO}_5$  ( $\text{M}+\text{Na}$ ) $^+$  405.0500, found 405.0495.

**Methyl 2-(2-((4-bromophenyl)ethynyl)phenyl)-4-methoxy-5-oxo-2,5-dihydrofuran-3-carboxylate (1h)**

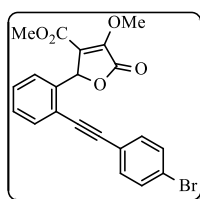

Pale green viscous oil, purified by chromatography (petroleum/ethyl acetate = 5/1),  $R_f$  = 0.3, 210 mg, yield = 28% (2 steps);  $^1\text{H NMR}$  (400 MHz,  $\text{CDCl}_3$ )  $\delta$  7.58 – 7.56 (m, 1H), 7.51 – 7.48 (m, 2H), 7.42 – 7.39 (m, 2H), 7.38 – 7.34 (m, 2H), 7.24 – 7.20 (m, 1H), 6.46 (s, 1H), 4.24 (s, 3H), 3.66 (s, 3H);  $^{13}\text{C NMR}$  (100 MHz,  $\text{CDCl}_3$ )  $\delta$  166.9, 161.5, 149.0, 135.5, 133.6, 133.2, 131.8, 129.5, 129.0, 127.9, 123.2, 123.1, 121.8, 121.7, 94.2, 87.5, 78.5, 60.4, 52.2; **IR** (KBr,  $\text{cm}^{-1}$ ) 3067, 2953, 1775, 1714, 1657, 1493, 1443, 1380, 1363, 1303, 1231, 1161, 1115, 1066, 997, 824, 763, 672, 627, 578, 483; **HRMS** (ESI) Calcd for  $\text{C}_{21}\text{H}_{15}\text{BrNaO}_5$  ( $\text{M}+\text{Na}$ ) $^+$  448.9995, found 448.9991.

**Methyl 4-methoxy-5-oxo-2-(2-((4-(trifluoromethyl)phenyl)ethynyl)phenyl)-2,5-dihydrofuran-3-carboxylate (1i)**

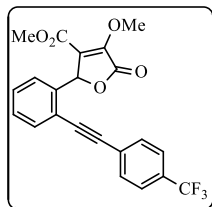

White solid, m.p. = 119-120 °C, purified by chromatography (petroleum/ethyl acetate = 5/1),  $R_f$  = 0.2, 222 mg, yield = 29% (2 steps);  $^1\text{H NMR}$  (400 MHz,  $\text{CDCl}_3$ )  $\delta$  7.67 – 7.59 (m, 5H), 7.40 – 7.35 (m, 2H), 7.26 – 7.22 (m, 1H), 6.47 (s, 1H), 4.24 (s, 3H), 3.67 (s, 3H);  $^{13}\text{C NMR}$  (100 MHz,  $\text{CDCl}_3$ )  $\delta$  166.9, 161.5, 149.0, 135.7, 133.8, 132.0, 130.5 (q,  $J$  = 32.5 Hz), 129.6, 129.3, 128.0, 126.6, 125.5 (q,  $J$  = 3.8 Hz), 124.0 (q,  $J$  = 270.7 Hz), 122.7, 121.7, 93.7, 88.7, 78.5, 60.4, 52.2;  $^{19}\text{F NMR}$  (376 MHz,  $\text{CDCl}_3$ )  $\delta$  -62.9; **IR** (KBr,  $\text{cm}^{-1}$ ) 3390, 3116, 3013, 2947, 2826, 2363, 2305, 2247, 2181, 1779, 1721, 1660, 1606, 1573, 1420, 1326, 1235, 1121, 1062, 993, 893, 839, 776, 725, 636, 583; **HRMS** (ESI) Calcd for  $\text{C}_{22}\text{H}_{15}\text{F}_3\text{NaO}_5$  ( $\text{M}+\text{Na}$ ) $^+$  439.0764, found 439.0757.

**Methyl 2-(2-((2-chlorophenyl)ethynyl)phenyl)-4-methoxy-5-oxo-2,5-dihydrofuran-3-carboxylate (1j)**

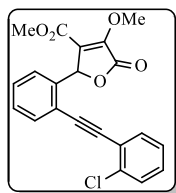

Yellow viscous oil, purified by chromatography (petroleum/ethyl acetate = 5/1),  $R_f$  = 0.3, 260 mg, yield = 33% (2 steps);  $^1\text{H NMR}$  (400 MHz,  $\text{CDCl}_3$ )  $\delta$  7.66 – 7.60 (m, 2H), 7.47 – 7.43 (m, 1H), 7.41 – 7.35 (m, 2H), 7.31 – 7.28 (m, 2H), 7.21 – 7.19 (m, 1H), 6.73 (s, 1H), 4.30 (s, 3H), 3.67 (s, 3H);  $^{13}\text{C NMR}$  (100 MHz,  $\text{CDCl}_3$ )  $\delta$  166.9, 161.4, 148.8, 136.1, 136.0, 133.4, 133.3, 129.8, 129.4, 129.2, 126.9, 126.7, 123.5, 122.8, 121.9, 91.7, 91.5, 77.9, 60.4, 52.2; **IR** (KBr,  $\text{cm}^{-1}$ ) 3117, 3013, 2949, 2826, 2362, 2308, 2247, 2181, 1779, 1718, 1659, 1583, 1493, 1431, 1383, 1235, 1118, 1053, 991, 894, 829, 772, 717; **HRMS** (ESI) Calcd for  $\text{C}_{21}\text{H}_{15}\text{ClNaO}_5$  ( $\text{M}+\text{Na}$ ) $^+$  405.0500, found 405.0503.

**Methyl 2-(2-((2-bromophenyl)ethynyl)phenyl)-4-methoxy-5-oxo-2,5-dihydrofuran-3-carboxylate (1k)**

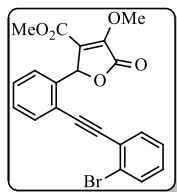

Yellow viscous oil, purified by chromatography (petroleum/ethyl acetate = 5/1),  $R_f$  = 0.3, 402 mg, yield = 54% (2 steps);  $^1\text{H NMR}$  (400 MHz,  $\text{CDCl}_3$ )  $\delta$  7.65 – 7.57 (m, 3H), 7.37 – 7.28 (m, 3H), 7.21 – 7.16 (m, 2H), 6.74 (s, 1H), 4.28 (s, 3H), 3.64 (s, 3H);  $^{13}\text{C NMR}$  (100 MHz,  $\text{CDCl}_3$ )  $\delta$  166.8, 161.3, 148.7, 136.0, 133.4, 133.3, 132.5, 129.9, 129.4, 129.1, 127.2, 126.9, 125.6, 125.0, 123.4, 121.9, 93.5, 90.8, 77.9, 60.4, 52.2; **IR** (KBr,  $\text{cm}^{-1}$ ) 2952, 2359, 1772, 1716, 1652, 1447, 1380, 1302, 1234, 1161, 1119, 987, 873, 754, 626, 484; **HRMS** (ESI) Calcd for  $\text{C}_{21}\text{H}_{15}\text{BrNaO}_5$  ( $\text{M}+\text{Na}$ ) $^+$  448.9995, found 448.9997.

**Methyl 4-methoxy-5-oxo-2-(2-(m-tolylethynyl)phenyl)-2,5-dihydrofuran-3-carboxylate (1l)**

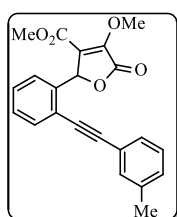

Yellow solid, m.p. = 74–75 °C, purified by chromatography (petroleum/ethyl acetate = 5/1),  $R_f$  = 0.3, 336 mg, yield = 41% (2 steps);  $^1\text{H NMR}$  (400 MHz,  $\text{CDCl}_3$ )  $\delta$  7.61 (dd,  $J$  = 7.3, 1.6 Hz, 1H), 7.41 – 7.33 (m, 4H), 7.30 – 7.28 (m, 1H), 7.24 – 7.18 (m, 2H), 6.57 (s, 1H), 4.28 (s, 3H), 3.68 (s, 3H), 2.39 (s, 3H);  $^{13}\text{C NMR}$  (100 MHz,  $\text{CDCl}_3$ )  $\delta$  166.9, 161.5, 148.8, 138.2, 135.4, 133.4, 132.2, 129.7, 129.4, 128.8, 128.6, 128.4, 127.5, 123.7, 122.6, 121.8, 95.4, 86.0, 78.3, 60.3, 52.1, 21.3; **IR** (KBr,  $\text{cm}^{-1}$ ) 3115, 3015, 2950, 2362, 2307, 2247, 2183, 1783, 1717, 1659, 1597, 1494, 1384, 1237, 1117, 991, 897, 832, 778, 631; **HRMS** (ESI) Calcd for  $\text{C}_{22}\text{H}_{18}\text{NaO}_5$  ( $\text{M}+\text{Na}$ ) $^+$  385.1046, found 385.1051.

**Methyl 2-(2-((3-fluorophenyl)ethynyl)phenyl)-4-methoxy-5-oxo-2,5-dihydrofuran-3-carboxylate (1m)**

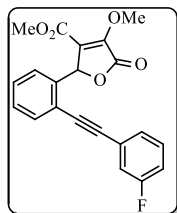

Yellow viscous oil, purified by chromatography (petroleum/ethyl acetate = 5/1),  $R_f$  = 0.3, 360 mg, yield = 44% (2 steps);  $^1\text{H NMR}$  (400 MHz,  $\text{CDCl}_3$ )  $\delta$  7.59 – 7.55 (m, 1H), 7.37 – 7.31 (m, 4H), 7.26 – 7.20 (m, 2H), 7.09 – 7.03 (m, 1H), 6.48 (s, 1H), 4.25 (s, 3H), 3.66 (s, 3H);  $^{13}\text{C NMR}$  (100 MHz,  $\text{CDCl}_3$ )  $\delta$  166.9, 162.5 (d,  $J$  = 245.3 Hz), 161.5, 148.9, 135.7, 133.6, 130.1 (d,  $J$  = 8.7 Hz), 129.5, 129.1, 127.8, 127.7 (d,  $J$  = 3.1 Hz), 124.6 (d,  $J$  = 9.4 Hz), 123.0, 121.7, 118.5 (d,  $J$  = 22.8 Hz), 116.1 (d,  $J$  = 21.1 Hz), 93.9 (d,  $J$  = 3.5 Hz), 87.3, 78.4, 60.3, 52.2;  $^{19}\text{F NMR}$  (376 MHz,  $\text{CDCl}_3$ )  $\delta$  -112.7; **IR** (KBr,  $\text{cm}^{-1}$ ) 3119, 3012, 2950, 2362, 2305, 2247, 2181, 1779, 1718, 1658, 1576, 1493, 1431, 1384, 1235, 1119, 991, 942, 871, 831, 777, 725, 633; **HRMS** (ESI) Calcd for  $\text{C}_{21}\text{H}_{15}\text{FNaO}_5$  ( $\text{M}+\text{Na}$ ) $^+$  389.0796, found 389.0798.

**Methyl 2-(2-((3-chlorophenyl)ethynyl)phenyl)-4-methoxy-5-oxo-2,5-dihydrofuran-3-carboxylate (1n)**

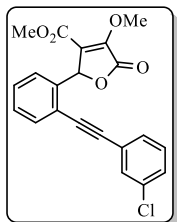

Yellow viscous oil, purified by chromatography (petroleum/ethyl acetate = 5/1),  $R_f$  = 0.3, 380 mg, yield = 40% (2 steps);  $^1\text{H NMR}$  (400 MHz,  $\text{CDCl}_3$ )  $\delta$  7.59 – 7.56 (m, 1H), 7.53 (s, 1H), 7.43 (d,  $J$  = 7.3 Hz, 1H), 7.38 – 7.29 (m, 4H), 7.23 – 7.20 (m, 1H), 6.48 (s, 1H), 4.26 (s, 3H), 3.67 (s, 3H).  $^{13}\text{C NMR}$  (100 MHz,  $\text{CDCl}_3$ )  $\delta$  166.8, 161.5, 148.9, 135.7, 134.4, 133.6, 131.5, 129.9, 129.8, 129.5, 129.1, 129.0, 127.7, 124.5, 122.9, 121.7, 93.7, 87.5, 78.4, 60.3, 52.2. **IR** (KBr,  $\text{cm}^{-1}$ ) 3117, 3013, 2949, 2362, 2307, 2247, 2181, 1780, 1718, 1659, 1592, 1235, 1118, 992, 891, 834, 777, 724, 581; **HRMS** (ESI) Calcd for  $\text{C}_{21}\text{H}_{15}\text{ClNaO}_5$  ( $\text{M}+\text{Na}$ ) $^+$  405.0500, found 405.0504.

**Methyl 4-methoxy-2-(2-(naphthalen-2-ylethynyl)phenyl)-5-oxo-2,5-dihydrofuran-3-carboxylate (1o)**

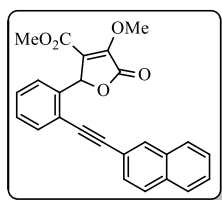

Brownness viscous oil, purified by chromatography (petroleum/ethyl acetate = 5/1),  $R_f$  = 0.4, 150 mg, yield = 20% (2 steps);  $^1\text{H NMR}$  (400 MHz,  $\text{CDCl}_3$ )  $\delta$  8.09 (s, 1H), 7.86 – 7.81 (m, 3H), 7.66 – 7.58 (m, 2H), 7.54 – 7.48 (m, 2H), 7.41 – 7.33 (m, 2H), 7.25 – 7.22 (m, 1H), 6.58 (s, 1H), 4.25 (s, 3H), 3.68 (s, 3H);  $^{13}\text{C NMR}$  (100 MHz,  $\text{CDCl}_3$ )  $\delta$  166.9, 161.5, 148.9, 135.6, 133.6, 133.1, 133.0, 131.8, 129.5, 128.8, 128.3, 128.2, 128.0, 127.9, 127.6, 127.0, 126.8, 123.6, 121.9, 120.1, 95.7, 86.7, 78.4, 60.3, 52.2; **IR** (KBr,  $\text{cm}^{-1}$ ) 3117, 3012, 2949, 2826, 2361, 2320, 2247, 2181, 1777, 1717, 1658, 1594, 1502, 1430, 1336, 1234, 1118, 992, 898, 824, 775, 730, 635, 580; **HRMS** (ESI) Calcd for  $\text{C}_{25}\text{H}_{18}\text{NaO}_5$  ( $\text{M}+\text{Na}$ ) $^+$  421.1046, found 421.1048.

**Methyl 4-methoxy-5-oxo-2-(2-(thiophen-3-ylethynyl)phenyl)-2,5-dihydrofuran-3-carboxylate (1p)**

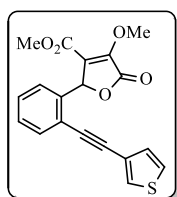

Brownness viscous oil, purified by chromatography (petroleum/ethyl acetate = 5/1),  $R_f$  = 0.4, 195 mg, yield = 23% (2 steps);  $^1\text{H NMR}$  (400 MHz,  $\text{CDCl}_3$ )  $\delta$  7.58 – 7.55 (m, 2H), 7.36 – 7.29 (m, 3H), 7.24 – 7.20 (m, 2H), 6.44 (s, 1H), 4.23 (s, 3H), 3.65 (s, 3H);  $^{13}\text{C NMR}$  (100 MHz,  $\text{CDCl}_3$ )  $\delta$  167.0, 161.5, 149.0, 135.3, 133.5, 129.9, 129.5, 129.4, 128.6, 128.0, 125.6, 123.3, 121.8, 121.7, 90.6, 85.9, 78.7, 60.3, 52.2; **IR** (KBr,  $\text{cm}^{-1}$ ) 3109, 2953, 2357, 1775, 1717, 1658, 1448, 1386, 1301, 1225, 1119, 990, 768, 624; **HRMS** (ESI) Calcd for  $\text{C}_{19}\text{H}_{14}\text{NaO}_5\text{S}$  ( $\text{M}+\text{Na}$ ) $^+$  377.0454, found 377.0449.

**Methyl 4-methoxy-5-oxo-2-(2-(pyridin-2-ylethynyl)phenyl)-2,5-dihydrofuran-3-carboxylate (1q)**

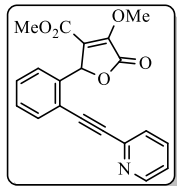

Yellow viscous oil, purified by chromatography (petroleum/ethyl acetate = 5/1),  $R_f$  = 0.2, 160 mg, yield = 24% (2 steps);  $^1\text{H NMR}$  (400 MHz,  $\text{CDCl}_3$ )  $\delta$  8.63 (d,  $J$  = 4.6 Hz, 1H), 7.72 – 7.66 (m, 2H), 7.57 (d,  $J$  = 7.8 Hz, 1H), 7.40 – 7.35 (m, 2H), 7.28 – 7.25 (m, 1H), 7.22 – 7.18 (m, 1H), 6.58 (s, 1H), 4.27 (s, 3H), 3.65 (s, 3H);  $^{13}\text{C NMR}$  (100 MHz,  $\text{CDCl}_3$ )  $\delta$  166.9, 161.4, 150.3, 149.0, 143.1, 136.4, 136.2, 133.9, 129.5, 129.4, 127.6, 127.3, 123.3, 122.8, 121.8, 94.2, 86.0, 78.1, 60.5, 52.3; **IR** (KBr,  $\text{cm}^{-1}$ ) 3390, 3118, 3011, 2949, 2362, 2320, 2247, 2180, 1777, 1718, 1658, 1580, 1465, 1425, 1337, 1235, 1118, 991, 893, 830, 777, 726, 633, 580; **HRMS** (ESI) Calcd for  $\text{C}_{20}\text{H}_{15}\text{NNaO}_5$  ( $\text{M}+\text{Na}$ ) $^+$  372.0842, found 372.0845.

**Methyl 4-methoxy-2-(2-(oct-1-yn-1-yl)phenyl)-5-oxo-2,5-dihydrofuran-3-carboxylate (1r)**

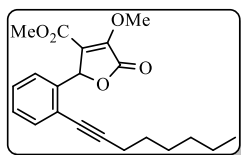

Yellow viscous oil, purified by chromatography (petroleum/ethyl acetate = 5/1),  $R_f$  = 0.4, 166 mg, yield = 20% (2 steps);  $^1\text{H NMR}$  (400 MHz,  $\text{CDCl}_3$ )  $\delta$  7.44 (dd,  $J$  = 7.4, 1.5 Hz, 1H), 7.31 – 7.23 (m, 2H), 7.11 (dd,  $J$  = 7.5, 1.4 Hz, 1H), 6.48 (s, 1H), 4.31 (s, 3H), 3.65 (s, 3H), 2.44 (t,  $J$  = 7.1 Hz, 2H), 1.66 – 1.58 (m, 2H), 1.49 – 1.41 (m, 2H), 1.34 – 1.28 (m, 4H), 0.90 (t,  $J$  = 7.0 Hz, 3H);  $^{13}\text{C NMR}$  (100 MHz,  $\text{CDCl}_3$ )  $\delta$  167.0, 161.6, 148.9, 135.3, 133.4, 129.3, 127.9, 127.1, 124.7, 121.9, 96.8, 78.4, 77.8, 60.4, 52.2, 31.5, 28.8, 28.7, 22.7, 19.8, 14.2; **IR** (KBr,  $\text{cm}^{-1}$ ) 3116, 3014, 2888, 2827, 2362, 2319, 2246, 2181, 1789, 1681, 1582, 1474, 1421, 1336, 1278, 1188, 1132, 992, 942, 893, 831, 778, 725, 635, 580; **HRMS** (ESI) Calcd for  $\text{C}_{21}\text{H}_{24}\text{NaO}_5$  ( $\text{M}+\text{Na}$ ) $^+$  379.1516, found 379.1521.

**Methyl 2-(2-ethynylphenyl)-4-methoxy-5-oxo-2,5-dihydrofuran-3-carboxylate (1s)**

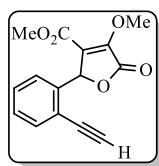

Brownness solid, m.p. = 101-102 °C, purified by chromatography (petroleum/ethyl acetate = 5/1),  $R_f$  = 0.4, 180 mg, yield = 18% (3 steps);  $^1\text{H NMR}$  (400 MHz,  $\text{CDCl}_3$ )  $\delta$  7.56 – 7.52 (m, 1H), 7.36 – 7.29 (m, 2H), 7.18 – 7.12 (m, 1H), 6.49 (s, 1H), 4.31 (s, 3H), 3.65 (s, 3H), 3.36 (s, 1H);  $^{13}\text{C NMR}$  (100 MHz,  $\text{CDCl}_3$ )  $\delta$  166.8, 161.4, 148.8, 136.4, 133.8, 129.4, 129.3, 127.1, 122.5, 121.6, 83.1, 80.7, 77.8, 60.4, 52.1; **IR** (KBr,  $\text{cm}^{-1}$ ) 3291, 3260, 3014, 2956, 2858, 1786, 1715, 1657, 1446, 1388, 1306, 1237, 1165, 1114, 989, 909, 769, 665, 621, 548; **HRMS** (ESI) Calcd for  $\text{C}_{15}\text{H}_{12}\text{NaO}_5$  ( $\text{M}+\text{Na}$ ) $^+$  295.0577, found 295.0576.

**Methyl 2-(4-fluoro-2-(phenylethynyl)phenyl)-4-methoxy-5-oxo-2,5-dihydrofuran-3-carboxylate (1t)**

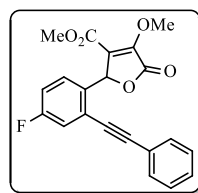

White solid, m.p. = 102-103 °C, purified by chromatography (petroleum/ethyl acetate = 5/1),  $R_f$  = 0.3, 390 mg, yield = 48% (2 steps);  $^1\text{H NMR}$  (400 MHz,  $\text{CDCl}_3$ )  $\delta$  7.57 – 7.52 (m, 2H), 7.39 – 7.35 (m, 3H), 7.30 – 7.26 (m, 1H), 7.18 (dd,  $J$  = 8.7, 5.5 Hz, 1H), 7.06 – 7.01 (m, 1H), 6.48 (s, 1H), 4.24 (s, 3H), 3.67 (s, 3H);  $^{13}\text{C NMR}$  (100 MHz,  $\text{CDCl}_3$ )  $\delta$  166.7, 162.7 (d,  $J$  = 248.4 Hz), 161.4, 149.0, 131.9, 131.6 (d,  $J$  = 3.3 Hz), 129.6 (d,  $J$  = 9.2 Hz), 129.2, 128.6, 125.6 (d,  $J$  = 10.1 Hz), 122.3, 121.5, 120.1 (d,  $J$  = 23.0 Hz), 116.2 (d,  $J$  = 21.7 Hz), 96.2, 85.2 (d,  $J$  = 2.9 Hz), 77.8, 60.3, 52.2;  $^{19}\text{F NMR}$  (376 MHz,  $\text{CDCl}_3$ )  $\delta$  -111.6; **IR** (KBr,  $\text{cm}^{-1}$ ) 3077, 3011, 2953, 2362, 2251, 2164, 1784, 1716, 1658, 1605, 1579, 1500, 1439, 1385, 1306, 1237, 1117, 992, 877, 827, 768, 692, 550; **HRMS** (ESI) Calcd for  $\text{C}_{21}\text{H}_{13}\text{FNaO}_5$  ( $\text{M}+\text{Na}$ ) $^+$  389.0796, found 389.0794.

**Methyl 2-(5-fluoro-2-(phenylethynyl)phenyl)-4-methoxy-5-oxo-2,5-dihydrofuran-3-carboxylate (1u)**

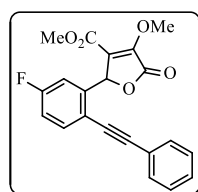

White solid, m.p. = 100-101 °C, purified by chromatography (petroleum/ethyl acetate = 5/1),  $R_f$  = 0.3, 257 mg, yield = 31% (2 steps);  $^1\text{H NMR}$  (400 MHz,  $\text{CDCl}_3$ )  $\delta$  7.59 – 7.52 (m, 3H), 7.38 – 7.34 (m, 3H), 7.10 – 7.05 (m, 1H), 6.92 (dd,  $J$  = 9.0, 2.6 Hz, 1H), 6.48 (s, 1H), 4.25 (s, 3H), 3.69 (s, 3H);  $^{13}\text{C NMR}$  (100 MHz,  $\text{CDCl}_3$ )  $\delta$  166.6, 162.4 (d,  $J$  = 249.8 Hz), 161.4, 149.1, 138.2 (d,  $J$  = 7.2 Hz), 135.3 (d,  $J$  = 8.0 Hz), 131.8, 128.9, 128.6, 122.7, 121.3, 119.8 (d,  $J$  = 3.5 Hz), 117.0 (d,  $J$  = 21.8 Hz), 114.8 (d,  $J$  = 23.0 Hz), 95.0 (d,  $J$  = 1.6 Hz), 85.4, 77.8, 60.4, 52.3;  $^{19}\text{F NMR}$  (376 MHz,  $\text{CDCl}_3$ )  $\delta$  -109.5; **IR** (KBr,  $\text{cm}^{-1}$ ) 3116, 3013, 2949, 2362, 2306, 2247, 2180, 1780, 1718, 1658, 1599, 1502, 1429, 1337, 1236, 1115, 994, 943, 889, 829, 773, 633, 580; **HRMS** (ESI) Calcd for  $\text{C}_{21}\text{H}_{13}\text{FNaO}_5$  ( $\text{M}+\text{Na}$ ) $^+$  389.0796, found 389.0796.

**Methyl 2-(4-chloro-2-(phenylethynyl)phenyl)-4-methoxy-5-oxo-2,5-dihydrofuran-3-carboxylate (1v)**

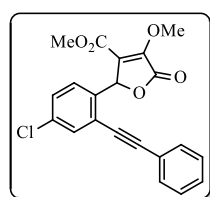

White solid, m.p. = 138-139 °C, purified by chromatography (petroleum/ethyl acetate = 5/1),  $R_f$  = 0.3, 360 mg, yield = 45% (2 steps);  $^1\text{H NMR}$  (400 MHz,  $\text{CDCl}_3$ )  $\delta$  7.58 – 7.52 (m, 3H), 7.39 – 7.35 (m, 3H), 7.33 – 7.29 (m, 1H), 7.14 (d,  $J$  = 8.4 Hz, 1H), 6.46 (s, 1H), 4.24 (s, 3H), 3.68 (s, 3H);  $^{13}\text{C NMR}$  (100 MHz,  $\text{CDCl}_3$ )  $\delta$  166.7, 161.4, 149.1, 135.4, 134.1, 133.2, 131.9, 129.2, 129.0, 128.9, 128.6, 125.2, 122.3, 121.4, 96.5, 85.1, 77.8, 60.4, 52.3; **IR** (KBr,  $\text{cm}^{-1}$ ) 3118, 3013,



2949, 2361, 2308, 2247, 2180, 1779, 1718, 1658, 1594, 1496, 1435, 1386, 1234, 1115, 992, 896, 828, 773, 634, 582; **HRMS** (ESI) Calcd for  $C_{21}H_{15}ClNaO_5$  ( $M+Na$ )<sup>+</sup> 405.0500, found 405.0502.

**Methyl 2-(5-chloro-2-(phenylethynyl)phenyl)-4-methoxy-5-oxo-2,5-dihydrofuran-3-carboxylate (1w)**

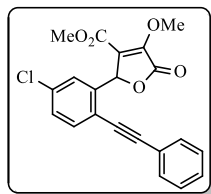

White solid, m.p. = 125-126 °C, purified by chromatography (petroleum/ethyl acetate = 5/1),  $R_f$  = 0.3, 390 mg, yield = 49% (2 steps); **<sup>1</sup>H NMR** (400 MHz,  $CDCl_3$ )  $\delta$  7.54 – 7.49 (m, 3H), 7.37 – 7.31 (m, 4H), 7.17 (d,  $J$  = 2.1 Hz, 1H), 6.46 (s, 1H), 4.25 (s, 3H), 3.68 (s, 3H); **<sup>13</sup>C NMR** (100 MHz,  $CDCl_3$ )  $\delta$  166.6, 161.3, 149.1, 137.4, 134.7, 134.6, 131.8, 129.8, 129.1, 128.6, 127.8, 122.5, 122.2, 121.3, 96.2, 85.4, 77.7, 60.4, 52.3; **IR** (KBr,  $cm^{-1}$ ) 3116, 3013, 2949, 2362, 2247, 2179, 1780, 1718, 1658, 1588, 1496, 1385, 1336, 1235, 1116, 993, 895, 828, 773, 635, 579; **HRMS** (ESI) Calcd for  $C_{21}H_{15}ClNaO_5$  ( $M+Na$ )<sup>+</sup> 405.0500, found 405.0500.

**Methyl 4-methoxy-2-(4-methyl-2-(phenylethynyl)phenyl)-5-oxo-2,5-dihydrofuran-3-carboxylate (1x)**

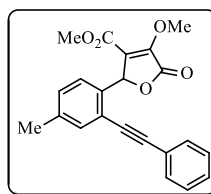

White solid, m.p. = 133-134 °C, purified by chromatography (petroleum/ethyl acetate = 5/1),  $R_f$  = 0.3, 180 mg, yield = 22% (2 steps); **<sup>1</sup>H NMR** (400 MHz,  $CDCl_3$ )  $\delta$  7.56 – 7.52 (m, 2H), 7.41 (s, 1H), 7.38 – 7.34 (m, 3H), 7.14 (dd,  $J$  = 8.0, 1.2 Hz, 1H), 7.09 (d,  $J$  = 8.0 Hz, 1H), 6.49 (s, 1H), 4.23 (s, 3H), 3.67 (s, 3H), 2.35 (s, 3H); **<sup>13</sup>C NMR** (100 MHz,  $CDCl_3$ )  $\delta$  167.0, 161.6, 148.8, 139.5, 133.9, 132.6, 131.8, 129.7, 128.7, 128.5, 127.6, 123.4, 122.9, 121.9, 94.8, 86.6, 78.4, 60.3, 52.2, 21.1; **IR** (KBr,  $cm^{-1}$ ) 3116, 3014, 2947, 2826, 2362, 2307, 2247, 2181, 1776, 1719, 1660, 1596, 1503, 1423, 1337, 1121, 991, 942, 893, 829, 776, 726, 635, 581; **HRMS** (ESI) Calcd for  $C_{22}H_{18}NaO_5$  ( $M+Na$ )<sup>+</sup> 385.1046, found 385.1048.

**Methyl 4-methoxy-2-(5-methoxy-2-(phenylethynyl)phenyl)-5-oxo-2,5-dihydrofuran-3-carboxylate (1y)**

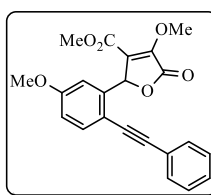

White solid, m.p. = 116-117 °C, purified by chromatography (petroleum/ethyl acetate = 5/1),  $R_f$  = 0.4, 240 mg, yield = 30% (2 steps); **<sup>1</sup>H NMR** (400 MHz,  $CDCl_3$ )  $\delta$  7.54 – 7.50 (m, 3H), 7.38 – 7.32 (m, 3H), 6.89 (dd,  $J$  = 8.6, 2.6 Hz, 1H), 6.70 (d,  $J$  = 2.6 Hz, 1H), 6.49 (s, 1H), 4.24 (s, 3H), 3.81 (s, 3H), 3.67 (s, 3H); **<sup>13</sup>C NMR** (100 MHz,  $CDCl_3$ )  $\delta$  166.9, 161.5, 159.8, 148.8, 137.1, 134.8, 131.6, 128.5, 123.2, 121.8, 115.7, 115.0, 113.3, 93.7, 86.4, 78.3, 60.3, 55.6, 52.2; **IR** (KBr,  $cm^{-1}$ ) 3117, 3012, 2948, 2831, 2362, 2308, 2247, 2180, 1778, 1718, 1659, 1603, 1505, 1429, 1336, 1286, 1234, 1116, 991, 941, 892, 828, 773, 634, 581; **HRMS** (ESI) Calcd for  $C_{22}H_{18}NaO_6$  ( $M+Na$ )<sup>+</sup> 401.0996, found 401.0991.

**Methyl 4-methoxy-5-oxo-2-(3-(phenylethynyl)thiophen-2-yl)-2,5-dihydrofuran-3-carboxylate (1z)**

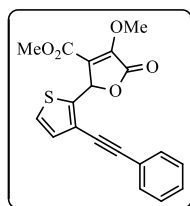

Yellow solid, m.p. = 74-75 °C, purified by chromatography (petroleum/ethyl acetate = 5/1),  $R_f$  = 0.3, 220 mg, yield = 26% (2 steps); **<sup>1</sup>H NMR** (400 MHz,  $CDCl_3$ )  $\delta$  7.54 – 7.51 (m, 2H), 7.37 – 7.33 (m, 3H), 7.30 (d,  $J$  = 5.2 Hz, 1H), 7.12 (d,  $J$  = 5.2 Hz, 1H), 6.48 (s, 1H), 4.26 (s, 3H), 3.71 (s, 3H); **<sup>13</sup>C NMR** (100 MHz,  $CDCl_3$ )  $\delta$  166.1, 161.3, 148.9, 139.1, 131.7, 130.8, 128.8, 128.5, 126.1, 123.6, 122.7, 121.1,

94.4, 82.4, 73.9, 60.5, 52.4; **IR** (KBr,  $\text{cm}^{-1}$ ) 3113, 3012, 2950, 2362, 2247, 2181, 1781, 1718, 1658, 1595, 1435, 1383, 1290, 1237, 1149, 1110, 987, 895, 847, 771, 640, 579; **HRMS** (ESI) Calcd for  $\text{C}_{19}\text{H}_{14}\text{NaO}_5\text{S}$  ( $\text{M}+\text{Na}$ )<sup>+</sup> 377.0454, found 377.0455.

**Methyl 4-methoxy-5-oxo-2-(2-(phenylethynyl)pyridin-3-yl)-2,5-dihydrofuran-3-carboxylate (1aa)**

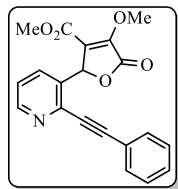

Yellow viscous oil, purified by chromatography (petroleum/ethyl acetate = 5/1),  $R_f$  = 0.2, 235 mg, yield = 28% (2 steps); **<sup>1</sup>H NMR** (400 MHz,  $\text{CDCl}_3$ )  $\delta$  8.63 (dd,  $J$  = 4.8, 1.6 Hz, 1H), 7.63 – 7.59 (m, 2H), 7.53 (dd,  $J$  = 7.9, 1.6 Hz, 1H), 7.40 – 7.35 (m, 3H), 7.30 – 7.26 (m, 1H), 6.51 (s, 1H), 4.26 (s, 3H), 3.66 (s, 3H); **<sup>13</sup>C NMR** (100 MHz,  $\text{CDCl}_3$ )  $\delta$  166.4, 161.2, 150.9, 149.2, 143.1, 135.3, 132.3, 132.2, 129.6, 128.6, 123.0, 121.8, 120.9, 94.8, 86.0, 60.5, 52.4; **IR** (KBr,  $\text{cm}^{-1}$ ) 3116, 3011, 2948, 2362, 2318, 2246, 2179, 1780, 1718, 1658, 1571, 1494, 1434, 1336, 1237, 1117, 992, 893, 828, 774, 720, 635, 579; **HRMS** (ESI) Calcd for  $\text{C}_{20}\text{H}_{15}\text{NNaO}_5$  ( $\text{M}+\text{Na}$ )<sup>+</sup> 372.0842, found 372.0846.

**1.3.2 General procedure for 1ab – 1ac**

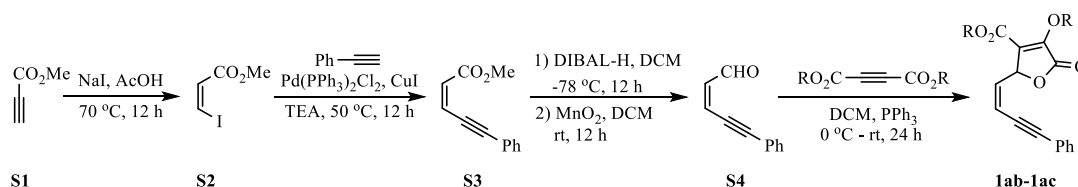

**Step 1-3:** Procedure for the synthesis of **S4** was identical to the literature.<sup>3</sup>

**Step 4:** To a magnetically stirred solution of **S4** (1.0 equiv) in dry DCM was added triphenylphosphine (1.2 equiv) at 0 °C under nitrogen atmosphere. After stirred for 5 min, the DCM solution of dimethyl acetylenedicarboxylate (1.2 equiv) was added dropwise. The mixture was allowed to stand at room temperature for 24 h. After the reaction was finished, the solvent was removed under reduced pressure and the residue was purified by flash chromatography on silica gel to afford the desired product **1ab-1ac**.<sup>2</sup> (Note that the substrate **1** with electron-withdrawing group on the aryl couldn't obtain through this method.)

**Methyl (Z)-4-methoxy-5-oxo-2-(4-phenylbut-1-en-3-yn-1-yl)-2,5-dihydrofuran-3-carboxylate (1ab)**

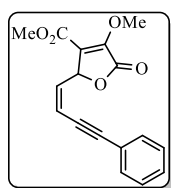

Brownness viscous oil, purified by chromatography (petroleum/ethyl acetate = 5/1),  $R_f$  = 0.4, 250 mg, yield = 26% (4 steps); **<sup>1</sup>H NMR** (400 MHz,  $\text{CDCl}_3$ )  $\delta$  7.49 – 7.44 (m, 2H), 7.35 – 7.31 (m, 3H), 6.08 (dd,  $J$  = 9.8, 6.6 Hz, 2H), 5.64 (dd,  $J$  = 10.6, 9.0 Hz, 1H), 4.25 (s, 3H), 3.78 (s, 3H); **<sup>13</sup>C NMR** (100 MHz,  $\text{CDCl}_3$ )  $\delta$  166.5, 161.5, 148.5, 134.2, 131.7, 128.9, 128.5, 122.7, 121.2, 116.6, 97.5, 84.3, 75.6, 60.3, 52.3; **IR** (KBr,  $\text{cm}^{-1}$ ) 2956, 2854, 2194, 1770, 1714, 1655, 1618, 1442, 1384, 1301, 1237, 1114, 988, 912, 751, 686, 530; **HRMS** (ESI) Calcd for  $\text{C}_{17}\text{H}_{14}\text{NaO}_5$  ( $\text{M}+\text{Na}$ )<sup>+</sup> 321.0733, found 321.0728.

**Ethyl (Z)-4-ethoxy-5-oxo-2-(4-phenylbut-1-en-3-yn-1-yl)-2,5-dihydrofuran-3-carboxylate (1ac)**

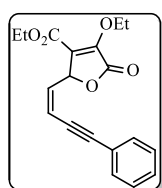

Brownness viscous oil, purified by chromatography (petroleum/ethyl acetate = 5/1),  $R_f$  = 0.4, 450 mg, yield = 43% (4 steps); **<sup>1</sup>H NMR** (400 MHz,  $\text{CDCl}_3$ )  $\delta$  7.47 – 7.45 (m, 2H), 7.36 – 7.31 (m, 3H), 6.09 (dd,  $J$  = 11.6, 10.0 Hz, 2H), 5.64 (dd,  $J$  = 10.6, 9.2 Hz, 1H), 4.73 – 4.65 (m, 1H), 4.64 – 4.56 (m, 1H), 4.29 – 4.21 (m, 2H), 1.39 (t,  $J$  = 7.1 Hz, 3H), 1.27 (t,  $J$  = 7.1 Hz, 3H); **<sup>13</sup>C NMR** (100 MHz,  $\text{CDCl}_3$ )  $\delta$  166.8, 161.2,

148.1, 134.5, 131.7, 128.9, 128.6, 122.7, 121.8, 116.6, 97.5, 84.5, 75.7, 69.0, 61.5, 15.5, 14.2; **IR** (KBr,  $\text{cm}^{-1}$ ) 2953, 2923, 2844, 2362, 2332, 1772, 1718, 1685, 1653, 1559, 1541, 1456, 1384, 1260, 1209, 1177, 1104, 1031, 862, 750, 690, 668, 550, 534, 510, 491, 484, 470, 450, 444, 432, 418; **HRMS** (ESI) Calcd for  $\text{C}_{19}\text{H}_{18}\text{NaO}_5$  ( $\text{M}+\text{Na}$ )<sup>+</sup> 349.1046, found 349.1041.

### 1.3.3 General procedure for **1ad** – **1af**

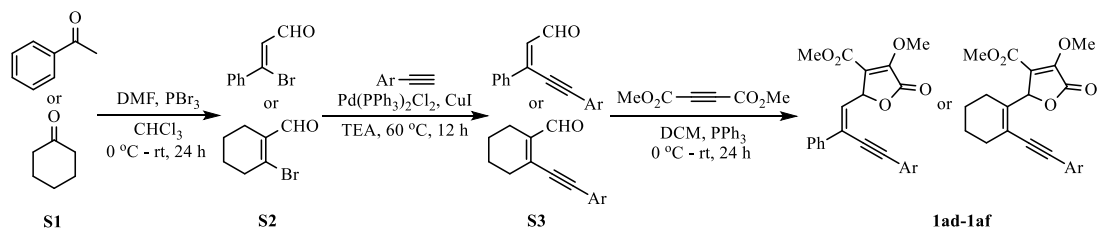

**Step 1:** Procedure for the synthesis of **S2** was identical to the literature.<sup>4</sup>

**Step 2:** Procedure for the synthesis of **S3** was identical to the literature.<sup>1</sup>

**Step 3:** To a magnetically stirred solution of **S3** (1.0 equiv) in dry DCM was added triphenylphosphine (1.2 equiv) at 0 °C under nitrogen atmosphere. After stirred for 5 min, the DCM solution of dimethyl acetylenedicarboxylate (1.2 equiv) was added dropwise. The mixture was allowed to stand at room temperature for 24 h. After the reaction was finished, the solvent was removed under reduced pressure and the residue was purified by flash chromatography on silica gel to afford the desired product **1ad**–**1af**.<sup>2</sup> (Note that the substrate **1** with electron-withdrawing group on the aryl couldn't obtain through this method.)

#### Methyl (Z)-2-(2,4-diphenylbut-1-en-3-yn-1-yl)-4-methoxy-5-oxo-2,5-dihydrofuran-3-carboxylate (**1ad**)

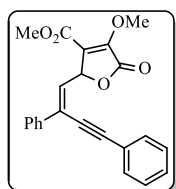

Brownness viscous oil, purified by chromatography (petroleum/ethyl acetate = 5/1),  $R_f$  = 0.4, 250 mg, yield = 31% (3 steps); **<sup>1</sup>H NMR** (400 MHz,  $\text{CDCl}_3$ )  $\delta$  7.71 – 7.66 (m, 2H), 7.58 – 7.55 (m, 2H), 7.41 – 7.36 (m, 6H), 6.33 (d,  $J$  = 9.2 Hz, 1H), 6.03 (d,  $J$  = 9.2 Hz, 1H), 4.28 (s, 3H), 3.78 (s, 3H); **<sup>13</sup>C NMR** (100 MHz,  $\text{CDCl}_3$ )  $\delta$  166.6, 161.6, 148.5, 136.6, 131.8, 130.8, 129.2, 129.1, 128.7, 128.6, 128.0, 126.7, 122.6, 121.4, 98.5, 85.0, 77.0, 60.4, 52.4; **IR** (KBr,  $\text{cm}^{-1}$ ) 2951, 1767, 1711, 1655, 1490, 1445, 1386, 1299, 1229, 1203, 1175, 1123, 1032, 988, 756, 691, 524, 491, 470, 457, 444, 431, 424, 418, 411; **HRMS** (ESI) Calcd for  $\text{C}_{23}\text{H}_{18}\text{NaO}_5$  ( $\text{M}+\text{Na}$ )<sup>+</sup> 397.1046, found 397.1049.

#### Methyl (Z)-4-methoxy-2-(4-(4-methoxyphenyl)-2-phenylbut-1-en-3-yn-1-yl)-5-oxo-2,5-dihydrofuran-3-carboxylate (**1ae**)

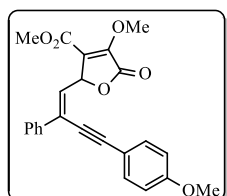

Brownness viscous oil, purified by chromatography (petroleum/ethyl acetate = 5/1),  $R_f$  = 0.3, 235 mg, yield = 30% (3 steps); **<sup>1</sup>H NMR** (400 MHz,  $\text{CDCl}_3$ )  $\delta$  7.71 – 7.66 (m, 2H), 7.52 – 7.48 (m, 2H), 7.41 – 7.33 (m, 3H), 6.92 – 6.88 (m, 2H), 6.32 (d,  $J$  = 9.2 Hz, 1H), 5.99 (d,  $J$  = 9.2 Hz, 1H), 4.27 (s, 3H), 3.83 (s, 3H), 3.78 (s, 3H); **<sup>13</sup>C NMR** (100 MHz,  $\text{CDCl}_3$ )  $\delta$  166.7, 161.6, 160.3, 148.4, 136.8, 133.3, 130.9, 129.1, 128.6, 127.2, 126.7, 121.5, 114.6, 114.2, 98.7, 83.9, 77.0, 60.3, 55.4, 52.3; **IR** (KBr,  $\text{cm}^{-1}$ ) 2954, 2840, 1770, 1722, 1657, 1601, 1569, 1510, 1496, 1449, 1388, 1291, 1249, 1231, 1205, 1173, 1128, 1108, 1029, 992, 961, 909, 834, 765, 695, 630, 536, 509; **HRMS** (ESI) Calcd for  $\text{C}_{24}\text{H}_{20}\text{NaO}_6$  ( $\text{M}+\text{Na}$ )<sup>+</sup> 427.1152, found 427.1156.

**Methyl 4-methoxy-5-oxo-2-(2-(phenylethynyl)cyclohex-1-en-1-yl)-2,5-dihydrofuran-3-carboxylate (1af)**

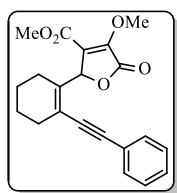

White solid, m.p. = 100-101 °C, purified by chromatography (petroleum/ethyl acetate = 5/1),  $R_f$  = 0.3, 246 mg, yield = 29% (3 steps);  $^1\text{H NMR}$  (400 MHz,  $\text{CDCl}_3$ )  $\delta$  7.46 – 7.41 (m, 2H), 7.34 – 7.29 (m, 3H), 6.37 (s, 1H), 4.22 (s, 3H), 3.79 (s, 3H), 2.36 (d,  $J$  = 6.2 Hz, 2H), 1.99 – 1.89 (m, 1H), 1.82 – 1.59 (m, 5H);  $^{13}\text{C NMR}$  (100 MHz,  $\text{CDCl}_3$ )  $\delta$  166.9, 161.8, 148.4, 136.3, 131.5, 129.9, 128.5, 124.1, 123.3, 121.4, 94.7, 87.7, 79.3, 60.1, 52.3, 30.8, 22.7, 22.1, 21.8; **IR** (KBr,  $\text{cm}^{-1}$ ) 2940, 2354, 1731, 1653, 1446, 1378, 1242, 1163, 1049, 987, 912, 873, 741, 635; **HRMS** (ESI) Calcd for  $\text{C}_{21}\text{H}_{20}\text{NaO}_5$  ( $\text{M}+\text{Na}$ ) $^+$  375.1203, found 375.1206.

**1.3.4 General procedure for 5**

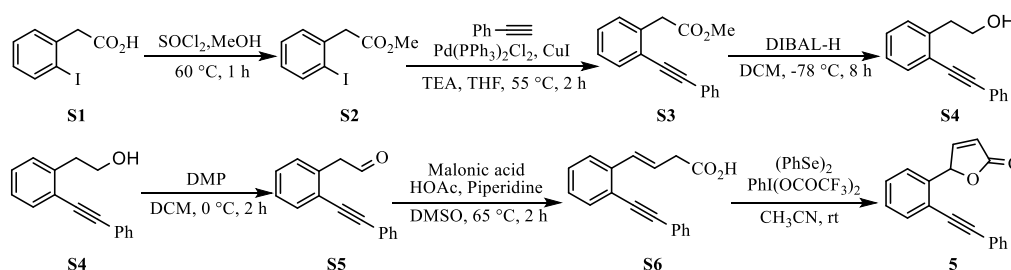

**Step 1:** To a solution of 2-iodophenylacetic acid **S1** (2.62 g, 10 mmol) in MeOH was added  $\text{SOCl}_2$  (0.8 mL, 12 mmol) at room temperature and then the mixture was heated to 60 °C for 1 h. The reaction was cooled to room temperature and quenched with water. The reaction solvent was removed in vacuum and the residue was extracted with EtOAc, washed with sat.  $\text{NaHCO}_3$  and brine, dried over  $\text{Na}_2\text{SO}_4$ , filtered, and concentrated under reduce pressure. The residue was purified by flash chromatography on silica (PE/EA = 20/1) to give **S2** (2.308 g, 84%) as a colorless oil.

**Step 2:** To a magnetically stirred solution of **S2** (2.308 g, 8.36 mmol, 1.0 equiv) in THF was added  $\text{Pd}(\text{PPh}_3)_2\text{Cl}_2$  (117 mg, 0.167 mmol, 0.02 equiv) and  $\text{CuI}$  (16 mg, 0.084 mmol, 0.01 equiv) under nitrogen atmosphere. After stirred for 5 min, the phenylacetylene (1.2 g, 12.5 mmol, 1.2 equiv) and  $\text{NEt}_3$  were added. The resulting mixture was stirred at 55 °C for 2 h. After the reaction was finished, the mixture was filtered by short silica, then the solvent was evaporated under reduced pressure and the residue was purified by flash chromatography on silica gel using petroleum ether and ethyl acetate (PE/EA = 20/1) as the eluent to afford **S3** (2.083 g, 99%).

**Step 3:** Procedure for the synthesis of **S4** was identical to the literature.<sup>3</sup>

**Step 4:** A suspension of Dess-Martin Periodinane (6 g, 14.3 mmol, 2.0 equiv) in DCM was cooled to 0 °C. To this was added **S4** (1.589 g, 7.16 mmol, 1.0 equiv) and the reaction was allowed to stir at room temperature under  $\text{N}_2$  atmosphere until TLC showed no remaining starting material. The reaction mixture was transferred to a separatory funnel and diluted with DCM. Organic phase was washed with 1 X sat.  $\text{Na}_2\text{S}_2\text{O}_3$ , 1 X sat.  $\text{NaHCO}_3$ , 1 X sat.  $\text{NaCl}$ . Organic phase was then dried over  $\text{Na}_2\text{SO}_4$  and solvent removed under removed pressure, the residue was purified by flash chromatography on silica (PE/EA = 10/1) to afford **S5** (1 g, 64%).

**Step 5:** A solution of malonic acid (1.05 g, 10 mmol, 2.2 equiv) in DMSO (20 mL) was treated with a solution of AcOH (5  $\mu\text{L}$ , 5.5 mg, 0.092 mmol, 0.02 equiv) and piperidine (9  $\mu\text{L}$ , 7.8 mg, 0.092 mmol, 0.02 equiv) in DMSO (1 mL). The reaction solution was warmed to 65 °C and freshly distilled **S5** (1 g, 4.59 mmol, 1.0 equiv) was added dropwise within 2 min. After the addition ended, the reaction mixture

was stirred for further 1.5 h at 65–70 °C. The solution was cooled to room temperature, taken up in H<sub>2</sub>O (25 mL) and extracted with Et<sub>2</sub>O (1 X 20 mL and 3 X 10 mL). The combined organic extracts were washed with 5% aqueous KHSO<sub>4</sub> and brine (20 mL each), dried over MgSO<sub>4</sub>, and evaporated to dryness. The solid residue was recrystallized from toluene/n-hexane (10:1 v/v) to give **S6** as pale yellow crystals (757 mg, 63%).<sup>5</sup>

**Step 6:** To a solution of diphenyl diselenide (5 mol %, 45 mg, 0.14 mmol) in acetonitrile (15 mL) was added the  $\beta,\gamma$ -unsaturated acid **S5** (757 mg, 2.88 mmol, 1.0 equiv), followed by bis(trifluoroacetoxy)iodobenzene (1.36 g, 3.16 mmol, 1.1 equiv) and the mixture stirred under argon at room temperature until TLC showed no remaining starting material. The solvent was evaporated under reduced pressure and the residue was purified by flash chromatography on silica gel using petroleum ether and ethyl acetate (PE/EA = 10/1) as the eluent to afford the cyclisation products **5** as brown yellow viscous oil (355 mg, 47%).<sup>6</sup>

### 5-(2-(phenylethynyl)phenyl)furan-2(5H)-one (**5**)

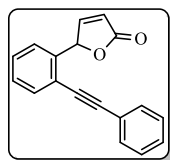

Brown yellow viscous oil, purified by chromatography (petroleum/ethyl acetate = 10/1),  $R_f$  = 0.4, 355 mg, yield = 14% (6 steps); <sup>1</sup>H NMR (400 MHz, CDCl<sub>3</sub>)  $\delta$  7.74 (dd,  $J$  = 5.6, 1.5 Hz, 1H), 7.60 – 7.58 (m, 1H), 7.56 – 7.51 (m, 2H), 7.40 – 7.34 (m, 5H), 7.30 – 7.26 (m, 1H), 6.59 (s, 1H), 6.20 (dd,  $J$  = 5.6, 2.1 Hz, 1H); <sup>13</sup>C NMR (100 MHz, CDCl<sub>3</sub>)  $\delta$  173.4, 156.0, 136.0, 132.7, 131.6, 129.3, 129.1, 128.9, 128.7, 125.2, 122.5, 121.5, 120.7, 95.9, 85.9, 82.8; IR (KBr, cm<sup>-1</sup>) 3840, 3750, 3651, 3062, 2924, 2216, 1790, 1760, 1599, 1572, 1493, 1444, 1276, 1156, 1102, 1079, 1031, 969, 895, 856, 841, 809, 758, 691, 617, 472; HRMS (DART) Calcd for C<sub>18</sub>H<sub>13</sub>O<sub>2</sub> (M+H)<sup>+</sup> 261.0910, found 261.0909.

### 1.3.5 General procedure for **5'**

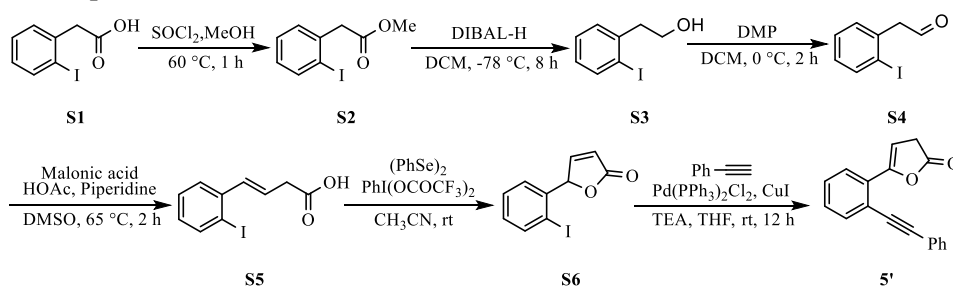

**Step 1:** To a solution of 2-iodophenylacetic acid **S1** (1.31 g, 5 mmol) in MeOH was added SOCl<sub>2</sub> (0.4 mL, 6 mmol) at room temperature and then the mixture was heated to 60 °C for 1 h. The reaction was cooled to room temperature and quenched with water. The reaction solvent was removed in vacuum and the residue was extracted with EtOAc, washed with sat. NaHCO<sub>3</sub> and brine, dried over Na<sub>2</sub>SO<sub>4</sub>, filtered, and concentrated under reduce pressure. The residue was purified by flash chromatography on silica (PE/EA = 20/1) to give **S2** (1.18 g, 85%) as a colorless oil.

**Step 2:** Procedure for the synthesis of **S3** was identical to the literature.<sup>3</sup>

**Step 3:** A suspension of Dess-Martin Periodinane (2.5 g, 6 mmol, 2.0 equiv) in DCM was cooled to 0 °C. To this was added **S3** (720 mg, 2.9 mmol, 1.0 equiv) and the reaction was allowed to stir at room temperature under N<sub>2</sub> atmosphere until TLC showed no remaining starting material. The reaction mixture was transferred to a separatory funnel and diluted with DCM. Organic phase was washed with 1 X sat. NaS<sub>2</sub>O<sub>3</sub>, 1 X sat. NaHCO<sub>3</sub>, 1 X sat. NaCl. Organic phase was then dried over Na<sub>2</sub>SO<sub>4</sub> and solvent

removed under reduced pressure, the residue was purified by flash chromatography on silica (PE/EA = 10/1) to afford **S4** (532 mg, 75%).

**Step 4:** A solution of malonic acid (494 mg, 4.75 mmol, 2.2 equiv) in DMSO (20 mL) was treated with a solution of AcOH (2.6 mg, 0.046 mmol, 0.02 equiv) and piperidine (3.7 mg, 0.046 mmol, 0.02 equiv) in DMSO (1 mL). The reaction solution was warmed to 65 °C and freshly distilled **S4** (532 mg, 2.16 mmol, 1.0 equiv) was added dropwise within 2 min. After the addition ended, the reaction mixture was stirred for further 1.5 h at 65–70 °C. The solution was cooled to room temperature, taken up in H<sub>2</sub>O (10 mL) and extracted with Et<sub>2</sub>O (1 X 20 mL and 3 X 10 mL). The combined organic extracts were washed with 5% aqueous KHSO<sub>4</sub> and brine (20 mL each), dried over MgSO<sub>4</sub>, and evaporated to dryness. The solid residue was recrystallized from toluene/n-hexane (10:1 v/v) to give **S5** as pale yellow crystals (467 mg, 75%).<sup>5</sup>

**Step 5:** To a solution of diphenyl diselenide (5 mol %, 26 mg, 0.08 mmol) in acetonitrile (15 mL) was added the  $\beta,\gamma$ -unsaturated acid **S5** (467 mg, 1.62 mmol, 1.0 equiv), followed by bis(trifluoroacetoxy)iodobenzene (767 mg, 1.78 mmol, 1.1 equiv) and the mixture stirred under argon at room temperature until TLC showed no remaining starting material. The solvent was evaporated under reduced pressure and the residue was purified by flash chromatography on silica gel using petroleum ether and ethyl acetate (PE/EA = 10/1) as the eluent to afford the cyclisation products **S6** as brown yellow viscous oil (300 mg, 65%).<sup>6</sup>

**Step 6:** To a magnetically stirred solution of **S6** (300 mg, 1.05 mmol, 1.0 equiv) in THF was added Pd(PPh<sub>3</sub>)<sub>2</sub>Cl<sub>2</sub> (22 mg, 0.03 mmol, 0.03 equiv) and CuI (10 mg, 0.05 mmol, 0.05 equiv) under nitrogen atmosphere. After stirred for 5 min, the phenylacetylene (118 mg, 1.15 mmol, 1.1 equiv) and NEt<sub>3</sub> were added. The resulting mixture was stirred at room temperature for 12 h. After the reaction was finished, the mixture was filtered by short silica, then the solvent was evaporated under reduced pressure and the residue was purified by flash chromatography on silica gel using petroleum ether and ethyl acetate (PE/EA = 20/1) as the eluent to afford **S3** (150 mg, 55%).

#### 5-(2-(phenylethynyl)phenyl)furan-2(3H)-one (5')

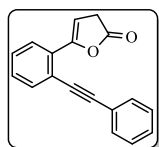

Brown viscous oil, purified by chromatography (petroleum/ethyl acetate = 10/1),  $R_f$  = 0.4, 150 mg, yield = 11% (6 steps); <sup>1</sup>H NMR (400 MHz, CDCl<sub>3</sub>)  $\delta$  7.73 (d,  $J$  = 7.7 Hz, 1H), 7.64 (dd,  $J$  = 7.5, 1.3 Hz, 1H), 7.55 – 7.52 (m, 2H), 7.43 – 7.33 (m, 5H), 6.60 (t,  $J$  = 2.7 Hz, 1H), 3.49 (d,  $J$  = 2.7 Hz, 2H); <sup>13</sup>C NMR (100 MHz, CDCl<sub>3</sub>)  $\delta$  175.6, 152.2, 134.1, 131.6, 129.1, 129.0, 128.9, 128.8, 128.7, 126.8, 123.0, 120.1, 103.2, 95.2, 88.7, 35.2; IR (KBr, cm<sup>-1</sup>) 3852, 3742, 3681, 2922, 2214, 1779, 1758, 1569, 1506, 1432, 1266, 1166, 1092, 1028, 951, 858, 815, 752, 686, 592; HRMS (ESI) Calcd for C<sub>18</sub>H<sub>12</sub>NaO<sub>2</sub> (M+Na)<sup>+</sup> 283.0730, found 283.0735.

### 1.4 General procedure for the synthesis of 3a – 3aa

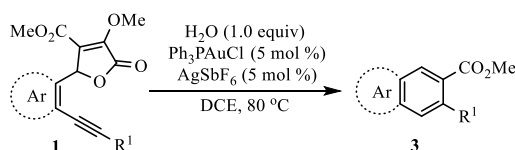

In a Schlenk tube with a magnetic bar under nitrogen atmosphere was added Ph<sub>3</sub>PAuCl (5 mol %) and

AgSbF<sub>6</sub> (5 mol %) in 1,2-dichloroethane (DCE, 2 mL), and then the substrates **1** (0.2 mmol) and H<sub>2</sub>O (0.2 mmol) were added. The mixture was stirred at 80 °C until the starting materials were completely consumed (monitored by TLC). After that, the mixture was filtered by short silica, the solvent was evaporated by rotary evaporator, and the residue was purified by flash column chromatography on silica gel using petroleum ether and ethyl acetate as elute to afford the pure product **3**.

#### Methyl 3-phenyl-2-naphthoate (**3a**)

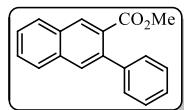

Pale yellow viscous oil, purified by chromatography (petroleum/ethyl acetate = 10/1),  $R_f$  = 0.6, 38 mg, yield = 74%; <sup>1</sup>H NMR (400 MHz, CDCl<sub>3</sub>)  $\delta$  8.41 (s, 1H), 7.95 (d,  $J$  = 8.1 Hz, 1H), 7.87 (d,  $J$  = 8.1 Hz, 1H), 7.83 (s, 1H), 7.62 – 7.53 (m, 2H), 7.47 – 7.36 (m, 5H), 3.71 (s, 3H); <sup>13</sup>C NMR (100 MHz, CDCl<sub>3</sub>)  $\delta$  169.1, 141.6, 138.9, 134.5, 131.7, 131.1, 129.9, 129.3, 128.7, 128.7, 128.4, 128.2, 127.9, 127.3, 126.9, 52.2. Spectral data of product **3a** was consistent with data reported in the literature.<sup>7</sup>

#### Methyl 3-(p-tolyl)-2-naphthoate (**3b**)

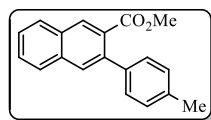

Yellow viscous oil, purified by chromatography (petroleum/ethyl acetate = 10/1),  $R_f$  = 0.6, 37 mg, yield = 67%; <sup>1</sup>H NMR (400 MHz, CDCl<sub>3</sub>)  $\delta$  8.41 (s, 1H), 7.96 (d,  $J$  = 8.0 Hz, 1H), 7.89 (d,  $J$  = 8.1 Hz, 1H), 7.84 (s, 1H), 7.64 – 7.54 (m, 2H), 7.34 (d,  $J$  = 8.1 Hz, 2H), 7.28 (d,  $J$  = 3.5 Hz, 2H), 3.76 (s, 3H), 2.45 (s, 3H); <sup>13</sup>C NMR (100 MHz, CDCl<sub>3</sub>)  $\delta$  169.2, 138.9, 138.6, 136.9, 134.6, 131.6, 131.0, 129.8, 129.3, 128.9, 128.7, 128.5, 128.3, 127.9, 126.8, 52.2, 21.4; IR (KBr, cm<sup>-1</sup>) 3390, 3119, 3014, 2946, 2361, 2322, 2247, 2181, 1726, 1586, 1422, 1335, 1278, 1208, 1136, 1088, 992, 944, 894, 829, 779, 728, 581, 475; HRMS (ESI) Calcd for C<sub>19</sub>H<sub>16</sub>NaO<sub>2</sub> (M+Na)<sup>+</sup> 299.1043, found 299.1047.

#### Methyl 3-(4-ethylphenyl)-2-naphthoate (**3c**)

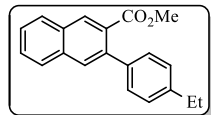

Yellow viscous oil, purified by chromatography (petroleum/ethyl acetate = 10/1),  $R_f$  = 0.6, 37 mg, yield = 64%; <sup>1</sup>H NMR (400 MHz, CDCl<sub>3</sub>)  $\delta$  8.37 (s, 1H), 7.92 (d,  $J$  = 8.0 Hz, 1H), 7.85 (d,  $J$  = 8.1 Hz, 1H), 7.81 (s, 1H), 7.59 – 7.50 (m, 2H), 7.33 (d,  $J$  = 8.1 Hz, 2H), 7.26 (d,  $J$  = 6.7 Hz, 2H), 3.71 (s, 3H), 2.72 (q,  $J$  = 7.6 Hz, 2H), 1.29 (t,  $J$  = 7.6 Hz, 3H); <sup>13</sup>C NMR (100 MHz, CDCl<sub>3</sub>)  $\delta$  169.3, 143.2, 138.9, 138.8, 134.6, 131.6, 131.0, 129.8, 129.4, 128.7, 128.6, 128.3, 127.9, 127.7, 126.7, 52.2, 28.7, 15.6; IR (KBr, cm<sup>-1</sup>) 3389, 3117, 3013, 2827, 2362, 2322, 2247, 2181, 1728, 1680, 1584, 1420, 1335, 1277, 1191, 1135, 992, 943, 894, 833, 779, 728, 581, 465; HRMS (ESI) Calcd for C<sub>20</sub>H<sub>18</sub>NaO<sub>2</sub> (M+Na)<sup>+</sup> 313.1199, found 313.1200.

#### Methyl 3-(4-(tert-butyl)phenyl)-2-naphthoate (**3d**)

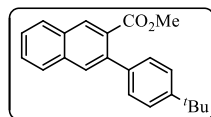

Yellow viscous oil, purified by chromatography (petroleum/ethyl acetate = 10/1),  $R_f$  = 0.6, 42 mg, yield = 66%; <sup>1</sup>H NMR (400 MHz, CDCl<sub>3</sub>)  $\delta$  8.37 (s, 1H), 7.93 (d,  $J$  = 8.1 Hz, 1H), 7.86 (d,  $J$  = 8.1 Hz, 1H), 7.83 (s, 1H), 7.60 – 7.51 (m, 2H), 7.47 – 7.44 (m, 2H), 7.37 – 7.34 (m, 2H), 3.71 (s, 3H), 1.39 (s, 9H); <sup>13</sup>C NMR (100 MHz, CDCl<sub>3</sub>)  $\delta$  169.4, 150.1, 138.8, 138.5, 134.6, 131.6, 130.9, 129.9, 129.4, 128.7, 128.3, 128.3, 127.9, 126.7, 125.1, 52.2, 34.7, 31.6; IR (KBr, cm<sup>-1</sup>) 3124, 3017, 2955, 2362, 2322, 2247, 2181, 1727, 1587, 1422, 1334, 1277, 1210, 1133, 1084, 992, 944, 895, 836, 781, 736, 584, 476; HRMS (ESI) Calcd for C<sub>22</sub>H<sub>22</sub>NaO<sub>2</sub> (M+Na)<sup>+</sup> 341.1512, found 341.1516.

### Methyl 3-(4-methoxyphenyl)-2-naphthoate (3e)

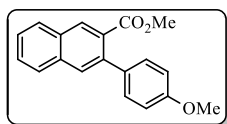

Orange viscous oil, purified by chromatography (petroleum/ethyl acetate = 10/1),  $R_f$  = 0.7, 36 mg, yield = 62%;  $^1\text{H NMR}$  (400 MHz,  $\text{CDCl}_3$ )  $\delta$  8.37 (s, 1H), 7.94 – 7.91 (m, 1H), 7.85 (d,  $J$  = 8.1 Hz, 1H), 7.80 (s, 1H), 7.60 – 7.51 (m, 2H), 7.36 – 7.32 (m, 2H), 7.00 – 6.95 (m, 2H), 3.87 (s, 3H), 3.73 (s, 3H);  $^{13}\text{C NMR}$  (100 MHz,  $\text{CDCl}_3$ )  $\delta$  169.3, 159.1, 138.5, 134.6, 133.9, 131.5, 130.9, 129.8, 129.7, 129.4, 128.7, 128.3, 127.8, 126.7, 113.7, 55.4, 52.2. Spectral data of product **3e** was consistent with data reported in the literature.<sup>8</sup>

### Methyl 3-(4-fluorophenyl)-2-naphthoate (3f)

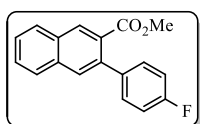

Yellow viscous oil, purified by chromatography (petroleum/ethyl acetate = 10/1),  $R_f$  = 0.6, 35 mg, yield = 63%;  $^1\text{H NMR}$  (400 MHz,  $\text{CDCl}_3$ )  $\delta$  8.42 (s, 1H), 7.95 (d,  $J$  = 8.1 Hz, 1H), 7.86 (d,  $J$  = 8.0 Hz, 1H), 7.78 (s, 1H), 7.62 – 7.53 (m, 2H), 7.39 – 7.34 (m, 2H), 7.15 – 7.09 (m, 2H), 3.72 (s, 3H);  $^{13}\text{C NMR}$  (100 MHz,  $\text{CDCl}_3$ )  $\delta$  168.8, 162.4 (d,  $J$  = 246.1 Hz), 137.9, 137.6 (d,  $J$  = 3.3 Hz), 134.5, 131.7, 131.4, 130.2 (d,  $J$  = 8.0 Hz), 130.0, 128.9, 128.8, 128.5, 127.9, 127.0, 115.1 (d,  $J$  = 21.5 Hz), 52.2;  $^{19}\text{F NMR}$  (376 MHz,  $\text{CDCl}_3$ )  $\delta$  -115.7. **IR** (KBr,  $\text{cm}^{-1}$ ) 3120, 3006, 2947, 2832, 2362, 2319, 2247, 2180, 1726, 1598, 1510, 1424, 1335, 1271, 1217, 1138, 1088, 994, 946, 896, 837, 739, 582, 476; **HRMS** (ESI) Calcd for  $\text{C}_{18}\text{H}_{13}\text{FNaO}_2$  ( $\text{M}+\text{Na}$ )<sup>+</sup> 303.0792, found 303.0791.

### Methyl 3-(4-chlorophenyl)-2-naphthoate (3g)

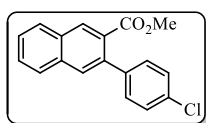

Yellow viscous oil, purified by chromatography (petroleum/ethyl acetate = 10/1),  $R_f$  = 0.6, 35 mg, yield = 60%;  $^1\text{H NMR}$  (400 MHz,  $\text{CDCl}_3$ )  $\delta$  8.43 (s, 1H), 7.95 (d,  $J$  = 8.0 Hz, 1H), 7.86 (d,  $J$  = 8.1 Hz, 1H), 7.78 (s, 1H), 7.63 – 7.53 (m, 2H), 7.42 – 7.38 (m, 2H), 7.35 – 7.31 (m, 2H), 3.73 (s, 3H);  $^{13}\text{C NMR}$  (100 MHz,  $\text{CDCl}_3$ )  $\delta$  168.7, 140.2, 137.8, 134.5, 133.4, 131.8, 131.5, 130.0, 129.9, 128.8, 128.7, 128.6, 128.4, 127.9, 127.1, 52.3; **IR** (KBr,  $\text{cm}^{-1}$ ) 3116, 3013, 2945, 2828, 2362, 2322, 2247, 2181, 1725, 1586, 1491, 1422, 1335, 1278, 1207, 1137, 1090, 993, 943, 894, 833, 780, 731, 637, 581, 473; **HRMS** (ESI) Calcd for  $\text{C}_{18}\text{H}_{13}\text{ClNaO}_2$  ( $\text{M}+\text{Na}$ )<sup>+</sup> 319.0496, found 319.0494.

### Methyl 3-(4-bromophenyl)-2-naphthoate (3h)

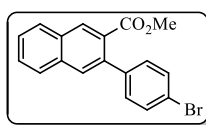

Yellow viscous oil, purified by chromatography (petroleum/ethyl acetate = 10/1),  $R_f$  = 0.6, 43 mg, yield = 64%;  $^1\text{H NMR}$  (400 MHz,  $\text{CDCl}_3$ )  $\delta$  8.43 (s, 1H), 7.94 (d,  $J$  = 8.0 Hz, 1H), 7.86 (d,  $J$  = 8.0 Hz, 1H), 7.76 (s, 1H), 7.62 – 7.53 (m, 4H), 7.26 (d,  $J$  = 8.6 Hz, 2H), 3.73 (s, 3H);  $^{13}\text{C NMR}$  (100 MHz,  $\text{CDCl}_3$ )  $\delta$  168.7, 140.6, 137.8, 134.5, 131.8, 131.6, 131.3, 130.4, 129.9, 128.8, 128.6, 128.6, 127.9, 127.1, 121.5, 52.3; **IR** (KBr,  $\text{cm}^{-1}$ ) 2992, 1765, 1717, 1485, 1376, 1243, 1055, 912, 833, 743, 639, 473; **HRMS** (ESI) Calcd for  $\text{C}_{18}\text{H}_{13}\text{BrNaO}_2$  ( $\text{M}+\text{Na}$ )<sup>+</sup> 362.9991, found 362.9997.

### Methyl 3-(4-(trifluoromethyl)phenyl)-2-naphthoate (3i)

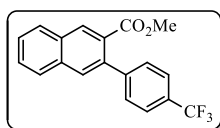

Light yellow solid, m.p. = 83-84 °C, purified by chromatography (petroleum/ethyl acetate = 10/1),  $R_f$  = 0.6, 33 mg, yield = 51%;  $^1\text{H NMR}$  (400 MHz,  $\text{CDCl}_3$ )  $\delta$  8.50 (s, 1H), 7.97 (d,  $J$  = 7.9 Hz, 1H), 7.88 (d,  $J$  = 8.0 Hz, 1H), 7.79 (s, 1H), 7.70 (d,  $J$  = 8.1 Hz, 2H), 7.65 – 7.57 (m, 2H), 7.52 (d,  $J$  = 8.0 Hz,



2H), 3.74 (s, 3H);  $^{13}\text{C}$  NMR (100 MHz,  $\text{CDCl}_3$ )  $\delta$  168.3, 145.5, 145.4, 137.7, 134.5, 131.9, 131.8, 130.2, 129.3 (d,  $J = 32.3$  Hz), 129.1, 128.8 (d,  $J = 6.2$  Hz), 128.3, 127.9, 127.3, 125.0 (q,  $J = 3.8$  Hz), 124.5 (q,  $J = 270.4$  Hz), 52.3;  $^{19}\text{F}$  NMR (376 MHz,  $\text{CDCl}_3$ )  $\delta$  -62.3; IR (KBr,  $\text{cm}^{-1}$ ) 2952, 2358, 1777, 1717, 1620, 1448, 1325, 1279, 1223, 1165, 1123, 1063, 1020, 953, 906, 846, 747, 608, 476; HRMS (ESI) Calcd for  $\text{C}_{19}\text{H}_{13}\text{F}_3\text{NaO}_2$  ( $\text{M}+\text{Na}$ ) $^+$  353.0760, found 353.0756.

### Methyl 3-(2-chlorophenyl)-2-naphthoate (3j)

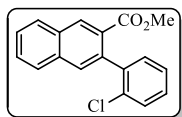

Light yellow viscous oil, purified by chromatography (petroleum/ethyl acetate = 10/1),  $R_f = 0.6$ , 36 mg, yield = 61%;  $^1\text{H}$  NMR (400 MHz,  $\text{CDCl}_3$ )  $\delta$  8.60 (s, 1H), 7.99 (d,  $J = 7.9$  Hz, 1H), 7.87 (d,  $J = 8.0$  Hz, 1H), 7.74 (s, 1H), 7.64 – 7.56 (m, 2H), 7.48 – 7.44 (m, 1H), 7.39 – 7.31 (m, 3H), 3.75 (s, 3H);  $^{13}\text{C}$  NMR (100 MHz,  $\text{CDCl}_3$ )  $\delta$  167.5, 140.9, 136.8, 134.7, 133.3, 132.1, 131.6, 130.7, 130.5, 129.0, 129.0, 128.7, 128.6, 128.4, 127.9, 127.2, 126.7, 52.3; IR (KBr,  $\text{cm}^{-1}$ ) 3390, 3116, 3012, 2827, 2362, 2322, 2247, 2181, 1681, 1582, 1420, 1335, 1277, 1189, 1135, 1051, 992, 942, 894, 831, 779, 726, 581, 462; HRMS (ESI) Calcd for  $\text{C}_{18}\text{H}_{13}\text{ClNaO}_2$  ( $\text{M}+\text{Na}$ ) $^+$  319.0496, found 319.0497.

### Methyl 3-(2-bromophenyl)-2-naphthoate (3k)

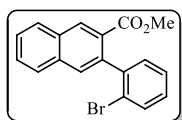

Yellow solid, m.p. = 85-86 °C, purified by chromatography (petroleum/ethyl acetate = 10/1),  $R_f = 0.6$ , 43 mg, yield = 64%;  $^1\text{H}$  NMR (400 MHz,  $\text{CDCl}_3$ )  $\delta$  8.63 (s, 1H), 8.00 (d,  $J = 7.9$  Hz, 1H), 7.88 (d,  $J = 7.9$  Hz, 1H), 7.73 (s, 1H), 7.67 (d,  $J = 8.0$  Hz, 1H), 7.65 – 7.56 (m, 2H), 7.44 – 7.36 (m, 2H), 7.29 – 7.24 (m, 1H), 3.76 (s, 3H);  $^{13}\text{C}$  NMR (100 MHz,  $\text{CDCl}_3$ )  $\delta$  167.3, 142.9, 138.4, 134.6, 132.1, 132.0, 131.6, 130.5, 130.3, 129.0, 128.7, 128.6, 128.1, 127.9, 127.1, 127.1, 123.5, 52.2; IR (KBr,  $\text{cm}^{-1}$ ) 2919, 2854, 1765, 1715, 1636, 1550, 1460, 1270, 1205, 1132, 1089, 901, 752, 680, 588; HRMS (ESI) Calcd for  $\text{C}_{18}\text{H}_{13}\text{BrNaO}_2$  ( $\text{M}+\text{Na}$ ) $^+$  362.9991, found 362.9988.

### Methyl 3-(m-tolyl)-2-naphthoate (3l)

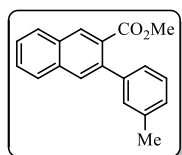

Brownness viscous oil, purified by chromatography (petroleum/ethyl acetate = 10/1),  $R_f = 0.6$ , 36 mg, yield = 66%;  $^1\text{H}$  NMR (400 MHz,  $\text{CDCl}_3$ )  $\delta$  8.38 (s, 1H), 7.94 (d,  $J = 8.0$  Hz, 1H), 7.87 (d,  $J = 8.1$  Hz, 1H), 7.82 (s, 1H), 7.61 – 7.52 (m, 2H), 7.32 (t,  $J = 7.6$  Hz, 1H), 7.25 (s, 1H), 7.19 (d,  $J = 7.2$  Hz, 2H), 3.71 (s, 3H), 2.43 (s, 3H);  $^{13}\text{C}$  NMR (100 MHz,  $\text{CDCl}_3$ )  $\delta$  169.3, 141.5, 139.0, 137.8, 134.5, 131.7, 130.9, 129.8, 129.4, 129.3, 128.7, 128.3, 128.1, 128.0, 127.9, 126.8, 125.8, 52.2, 21.6; IR (KBr,  $\text{cm}^{-1}$ ) 3116, 3014, 2946, 2362, 2323, 2247, 2181, 1726, 1588, 1422, 1334, 1277, 1196, 1135, 1088, 992, 944, 893, 840, 781, 736, 637, 582, 477; HRMS (ESI) Calcd for  $\text{C}_{19}\text{H}_{16}\text{NaO}_2$  ( $\text{M}+\text{Na}$ ) $^+$  299.1043, found 299.1046.

### Methyl 3-(3-fluorophenyl)-2-naphthoate (3m)

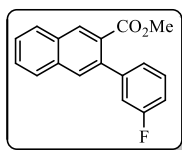

Light yellow viscous oil, purified by chromatography (petroleum/ethyl acetate = 10/1),  $R_f = 0.6$ , 29 mg, yield = 52%;  $^1\text{H}$  NMR (400 MHz,  $\text{CDCl}_3$ )  $\delta$  8.43 (s, 1H), 7.95 (d,  $J = 8.0$  Hz, 1H), 7.87 (d,  $J = 8.0$  Hz, 1H), 7.80 (s, 1H), 7.64 – 7.54 (m, 2H), 7.42 – 7.35 (m, 1H), 7.18 – 7.05 (m, 3H), 3.73 (s, 3H);  $^{13}\text{C}$  NMR (100 MHz,  $\text{CDCl}_3$ )  $\delta$  168.7, 162.7 (d,  $J = 245.8$  Hz), 143.9 (d,  $J = 8.0$  Hz), 137.7 (d,  $J = 2.0$  Hz), 134.5, 131.9, 131.5, 130.0, 129.6, 129.5, 128.8, 128.6, 128.0, 127.2, 124.5 (d,  $J = 2.8$  Hz), 115.7 (d,  $J = 21.9$  Hz), 114.1 (d,  $J = 21.1$  Hz), 52.3;  $^{19}\text{F}$  NMR (376 MHz,  $\text{CDCl}_3$ )  $\delta$  -113.8; IR (KBr,  $\text{cm}^{-1}$ ) 3118, 3013,

2947, 2362, 2322, 2247, 2181, 1727, 1582, 1471, 1422, 1335, 1278, 1135, 994, 943, 895, 858, 780, 730, 635, 581, 467; **HRMS** (ESI) Calcd for  $C_{18}H_{13}FNaO_2$  ( $M+Na$ )<sup>+</sup> 303.0792, found 303.0788.

#### Methyl 3-(3-chlorophenyl)-2-naphthoate (3n)

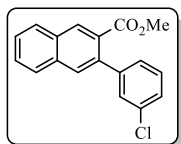

Yellow viscous oil, purified by chromatography (petroleum/ethyl acetate = 10/1),  $R_f$  = 0.6, 33 mg, yield = 56%; **<sup>1</sup>H NMR** (400 MHz,  $CDCl_3$ )  $\delta$  8.43 (s, 1H), 7.95 (d,  $J$  = 8.0 Hz, 1H), 7.87 (d,  $J$  = 8.1 Hz, 1H), 7.79 (s, 1H), 7.63 – 7.54 (m, 2H), 7.42 – 7.41 (m, 1H), 7.37 – 7.33 (m, 2H), 7.27 – 7.24 (m, 1H), 3.73 (s, 3H). **<sup>13</sup>C NMR** (100 MHz,  $CDCl_3$ )  $\delta$  168.4, 143.3, 137.4, 134.3, 133.9, 131.7, 131.4, 129.9, 129.1, 128.6, 128.6, 128.5, 128.5, 127.8, 127.1, 127.0, 126.9, 52.1. **IR** (KBr,  $cm^{-1}$ ) 3390, 3118, 3012, 2947, 2362, 2322, 2247, 2181, 1726, 1592, 1475, 1420, 1334, 1278, 1212, 1137, 1089, 997, 944, 892, 831, 782, 582, 477; **HRMS** (ESI) Calcd for  $C_{18}H_{13}ClNaO_2$  ( $M+Na$ )<sup>+</sup> 319.0496, found 319.0493.

#### Methyl [2,2'-binaphthalene]-3-carboxylate (3o)

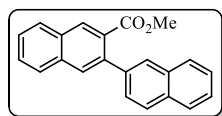

Yellow viscous oil, purified by chromatography (petroleum/ethyl acetate = 10/1),  $R_f$  = 0.7, 40 mg, yield = 65%; **<sup>1</sup>H NMR** (400 MHz,  $CDCl_3$ )  $\delta$  8.47 (s, 1H), 7.98 (d,  $J$  = 8.0 Hz, 1H), 7.94 – 7.87 (m, 6H), 7.64 – 7.50 (m, 5H), 3.67 (s, 3H); **<sup>13</sup>C NMR** (100 MHz,  $CDCl_3$ )  $\delta$  169.1, 139.3, 138.9, 134.6, 133.5, 132.6, 131.8, 131.4, 130.3, 129.2, 128.8, 128.5, 128.2, 127.9, 127.8, 127.5, 127.4, 127.0, 126.9, 126.3, 126.1, 52.2; **IR** (KBr,  $cm^{-1}$ ) 3748, 2993, 2916, 2362, 1768, 1719, 1374, 1244, 1131, 1084, 1050, 912, 744, 477; **HRMS** (ESI) Calcd for  $C_{22}H_{16}NaO_2$  ( $M+Na$ )<sup>+</sup> 335.1043, found 335.1040.

#### Methyl 3-(thiophen-3-yl)-2-naphthoate (3p)

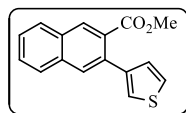

Brown yellow viscous oil, purified by chromatography (petroleum/ethyl acetate = 10/1),  $R_f$  = 0.6, 34 mg, yield = 63%; **<sup>1</sup>H NMR** (400 MHz,  $CDCl_3$ )  $\delta$  8.35 (s, 1H), 7.92 (d,  $J$  = 8.0 Hz, 1H), 7.87 (s, 1H), 7.85 (d,  $J$  = 8.4 Hz, 1H), 7.60 – 7.52 (m, 2H), 7.37 (dd,  $J$  = 4.9, 3.0 Hz, 1H), 7.32 (dd,  $J$  = 3.0, 1.3 Hz, 1H), 7.17 (dd,  $J$  = 4.9, 1.3 Hz, 1H), 3.78 (s, 3H); **<sup>13</sup>C NMR** (100 MHz,  $CDCl_3$ )  $\delta$  169.1, 141.8, 134.5, 133.4, 131.8, 130.9, 129.7, 129.3, 128.8, 128.7, 128.4, 127.9, 126.9, 125.1, 122.2, 52.3; **IR** (KBr,  $cm^{-1}$ ) 2919, 2359, 1714, 1525, 1446, 1362, 1267, 1205, 1130, 1081, 1008, 850, 752, 678, 474; **HRMS** (ESI) Calcd for  $C_{16}H_{12}NaO_2S$  ( $M+Na$ )<sup>+</sup> 291.0450, found 291.0446.

#### Methyl 6-fluoro-3-phenyl-2-naphthoate (3t)

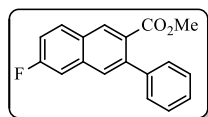

Yellow solid, m.p. = 75-76 °C, purified by chromatography (petroleum/ethyl acetate = 10/1),  $R_f$  = 0.6, 37 mg, yield = 66%; **<sup>1</sup>H NMR** (400 MHz,  $CDCl_3$ )  $\delta$  8.40 (s, 1H), 7.94 (dd,  $J$  = 9.0, 5.6 Hz, 1H), 7.76 (s, 1H), 7.49 – 7.36 (m, 6H), 7.35 – 7.30 (m, 1H), 3.69 (s, 3H); **<sup>13</sup>C NMR** (100 MHz,  $CDCl_3$ )  $\delta$  168.9, 162.3 (d,  $J$  = 249.5 Hz), 141.3, 140.1, 135.6 (d,  $J$  = 9.8 Hz), 131.3 (d,  $J$  = 9.5 Hz), 131.1 (d,  $J$  = 0.7 Hz), 129.2 (d,  $J$  = 5.4 Hz), 128.7, 128.6 (d,  $J$  = 2.8 Hz), 128.5, 128.2, 127.4, 117.4 (d,  $J$  = 25.6 Hz), 111.1 (d,  $J$  = 20.8 Hz), 52.2; **<sup>19</sup>F NMR** (376 MHz,  $CDCl_3$ )  $\delta$  -110.8; **IR** (KBr,  $cm^{-1}$ ) 3118, 3017, 2948, 2362, 2323, 2247, 2181, 1726, 1575, 1498, 1422, 1277, 1197, 1144, 1089, 992, 899, 847, 778, 705, 580, 475; **HRMS** (ESI) Calcd for  $C_{18}H_{13}FNaO_2$  ( $M+Na$ )<sup>+</sup> 303.0792, found 303.0791.

### Methyl 7-fluoro-3-phenyl-2-naphthoate (3u)

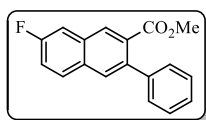

Yellow solid, m.p. = 84-85 °C, purified by chromatography (petroleum/ethyl acetate = 10/1),  $R_f$  = 0.6, 38 mg, yield = 67%;  $^1\text{H NMR}$  (400 MHz,  $\text{CDCl}_3$ )  $\delta$  8.31 (s, 1H), 7.86 (dd,  $J$  = 9.0, 5.5 Hz, 1H), 7.82 (s, 1H), 7.55 (dd,  $J$  = 9.4, 2.4 Hz, 1H), 7.46 – 7.35 (m, 6H), 3.70 (s, 3H);  $^{13}\text{C NMR}$  (100 MHz,  $\text{CDCl}_3$ )  $\delta$  169.0, 161.1 (d,  $J$  = 247.9 Hz), 141.3, 138.3 (d,  $J$  = 2.6 Hz), 132.5 (d,  $J$  = 9.5 Hz), 131.5, 130.5, 130.4 (d,  $J$  = 1.7 Hz), 130.1 (d,  $J$  = 5.5 Hz), 129.8, 128.6, 128.3, 127.4, 118.8 (d,  $J$  = 25.5 Hz), 111.7 (d,  $J$  = 20.8 Hz), 52.3;  $^{19}\text{F NMR}$  (376 MHz,  $\text{CDCl}_3$ )  $\delta$  -113.1; **IR** (KBr,  $\text{cm}^{-1}$ ) 3390, 3117, 3015, 2945, 2362, 2322, 2247, 2181, 1728, 1598, 1496, 1423, 1337, 1275, 1140, 1087, 992, 943, 897, 775, 706, 581, 476; **HRMS** (ESI) Calcd for  $\text{C}_{18}\text{H}_{13}\text{FNaO}_2$  ( $\text{M}+\text{Na}$ ) $^+$  303.0792, found 303.0787.

### Methyl 6-chloro-3-phenyl-2-naphthoate (3v)

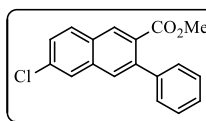

Light yellow viscous oil, purified by chromatography (petroleum/ethyl acetate = 10/1),  $R_f$  = 0.6, 36 mg, yield = 63%;  $^1\text{H NMR}$  (400 MHz,  $\text{CDCl}_3$ )  $\delta$  8.36 (s, 1H), 7.87 (d,  $J$  = 8.8 Hz, 1H), 7.85 (d,  $J$  = 1.7 Hz, 1H), 7.73 (s, 1H), 7.49 (dd,  $J$  = 8.7, 2.0 Hz, 1H), 7.46 – 7.37 (m, 5H), 3.69 (s, 3H);  $^{13}\text{C NMR}$  (100 MHz,  $\text{CDCl}_3$ )  $\delta$  168.8, 141.2, 140.2, 135.1, 134.3, 130.9, 130.3, 129.9, 129.6, 128.9, 128.6, 128.3, 127.9, 127.5, 126.7, 52.3; **IR** (KBr,  $\text{cm}^{-1}$ ) 3116, 3015, 2946, 2361, 2322, 2247, 2181, 1726, 1584, 1421, 1340, 1276, 1137, 1085, 993, 945, 899, 829, 775, 705, 579, 472; **HRMS** (ESI) Calcd for  $\text{C}_{18}\text{H}_{13}\text{ClNaO}_2$  ( $\text{M}+\text{Na}$ ) $^+$  319.0496, found 319.0493.

### Methyl 7-chloro-3-phenyl-2-naphthoate (3w)

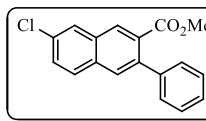

Light yellow viscous oil, purified by chromatography (petroleum/ethyl acetate = 10/1),  $R_f$  = 0.6, 37 mg, yield = 65%;  $^1\text{H NMR}$  (400 MHz,  $\text{CDCl}_3$ )  $\delta$  8.28 (s, 1H), 7.92 (d,  $J$  = 1.8 Hz, 1H), 7.80 (t,  $J$  = 4.3 Hz, 2H), 7.53 (dd,  $J$  = 8.8, 2.1 Hz, 1H), 7.46 – 7.36 (m, 5H), 3.70 (s, 3H);  $^{13}\text{C NMR}$  (100 MHz,  $\text{CDCl}_3$ )  $\delta$  168.9, 141.2, 139.3, 132.7, 132.7, 132.3, 130.5, 130.0, 129.7, 129.5, 129.3, 128.6, 128.3, 127.5, 127.3, 52.3; **IR** (KBr,  $\text{cm}^{-1}$ ) 3117, 3015, 2946, 2362, 2323, 2247, 2181, 1727, 1586, 1484, 1426, 1337, 1272, 1211, 1139, 1090, 992, 899, 824, 775, 707, 581, 473; **HRMS** (ESI) Calcd for  $\text{C}_{18}\text{H}_{13}\text{ClNaO}_2$  ( $\text{M}+\text{Na}$ ) $^+$  319.0496, found 319.0492.

### Methyl 7-methoxy-3-phenyl-2-naphthoate (3x)

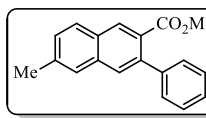

Yellow viscous oil, purified by chromatography (petroleum/ethyl acetate = 10/1),  $R_f$  = 0.6, 38 mg, yield = 70%;  $^1\text{H NMR}$  (400 MHz,  $\text{CDCl}_3$ )  $\delta$  8.37 (s, 1H), 7.84 (d,  $J$  = 8.4 Hz, 1H), 7.73 (s, 1H), 7.63 (s, 1H), 7.46 – 7.35 (m, 6H), 3.69 (s, 3H), 2.55 (s, 3H);  $^{13}\text{C NMR}$  (100 MHz,  $\text{CDCl}_3$ )  $\delta$  169.2, 141.8, 139.1, 138.5, 134.8, 131.0, 129.9, 129.3, 129.2, 128.7, 128.5, 128.3, 128.1, 127.2, 126.9, 52.1, 22.1; **IR** (KBr,  $\text{cm}^{-1}$ ) 3390, 3117, 3017, 2947, 2362, 2322, 2247, 2181, 1725, 1589, 1494, 1426, 1330, 1275, 1192, 1143, 1091, 993, 901, 834, 776, 736, 703, 580, 477; **HRMS** (ESI) Calcd for  $\text{C}_{19}\text{H}_{16}\text{NaO}_2$  ( $\text{M}+\text{Na}$ ) $^+$  299.1043, found 299.1047.

### Methyl 5-phenylbenzo[b]thiophene-6-carboxylate (**3z**)

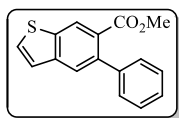

Yellow viscous oil, purified by chromatography (petroleum/ethyl acetate = 10/1),  $R_f$  = 0.6, 16 mg, yield = 30%;  $^1\text{H NMR}$  (400 MHz,  $\text{CDCl}_3$ )  $\delta$  8.43 (s, 1H), 7.79 (s, 1H), 7.64 (d,  $J$  = 5.4 Hz, 1H), 7.44 – 7.34 (m, 6H), 3.67 (s, 3H);  $^{13}\text{C NMR}$  (100 MHz,  $\text{CDCl}_3$ )  $\delta$  169.0, 141.9, 141.9, 139.0, 138.3, 130.5, 128.7, 128.1, 127.2, 127.1, 125.7, 124.9, 123.9, 52.2; **IR** (KBr,  $\text{cm}^{-1}$ ) 3114, 3013, 2828, 2362, 2323, 2247, 2181, 1728, 1681, 1588, 1421, 1333, 1279, 1242, 1187, 1127, 991, 942, 893, 831, 778, 724, 581; **HRMS** (ESI) Calcd for  $\text{C}_{16}\text{H}_{12}\text{NaO}_2\text{S}$  ( $\text{M}+\text{Na}$ ) $^+$  291.0450, found 291.0448.

### Methyl 4-(2-methoxy-2-oxoacetyl)-5-phenylbenzo[b]thiophene-6-carboxylate (**3z'**)

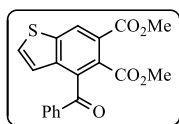

Yellow viscous oil, purified by chromatography (petroleum/ethyl acetate = 10/1),  $R_f$  = 0.4, 20 mg, yield = 37%;  $^1\text{H NMR}$  (400 MHz,  $\text{CDCl}_3$ )  $\delta$  8.53 (s, 1H), 7.79 – 7.76 (m, 2H), 7.66 (d,  $J$  = 5.6 Hz, 1H), 7.59 (t,  $J$  = 7.4 Hz, 1H), 7.44 (t,  $J$  = 7.8 Hz, 2H), 7.13 (d,  $J$  = 5.5 Hz, 1H), 3.93 (s, 3H), 3.59 (s, 3H);  $^{13}\text{C NMR}$  (100 MHz,  $\text{CDCl}_3$ )  $\delta$  195.6, 167.7, 166.9, 141.5, 139.2, 137.0, 134.9, 133.9, 132.2, 129.9, 128.8, 128.8, 126.2, 125.9, 123.3, 52.9, 52.7; **IR** (KBr,  $\text{cm}^{-1}$ ) 3109, 3011, 2947, 2362, 2323, 2247, 2181, 1730, 1672, 1587, 1424, 1335, 1279, 1138, 994, 943, 894, 835, 777, 725, 660, 581; **HRMS** (ESI) Calcd for  $\text{C}_{19}\text{H}_{14}\text{NaO}_5\text{S}$  ( $\text{M}+\text{Na}$ ) $^+$  377.0454, found 377.0455.

## 1.5 General procedure for the synthesis of **4a** – **4e**

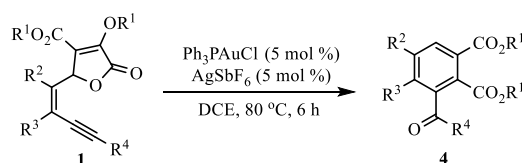

In a Schlenk tube with a magnetic bar under nitrogen atmosphere was added  $\text{Ph}_3\text{PAuCl}$  (5 mol %) and  $\text{AgSbF}_6$  (5 mol %) in 1,2-dichloroethane (DCE, 2 mL), and then the substrates **1** (0.2 mmol) was added. The mixture was stirred at 80 °C until the starting materials was completely consumed (monitored by TLC). After that, the mixture was filtered by short silica, the solvent was evaporated by rotary evaporator, and the residue was purified by flash column chromatography on silica gel using petroleum ether and ethyl acetate as elute to afford the pure product **4**.

### Dimethyl 3-benzoylphthalate (**4a**)

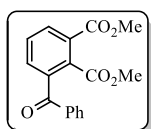

White solid, m.p. = 125-126 °C, purified by chromatography (petroleum/ethyl acetate = 6/1),  $R_f$  = 0.4, 36 mg, yield = 65%,  $^1\text{H NMR}$  (400 MHz,  $\text{CDCl}_3$ )  $\delta$  8.06 (dd,  $J$  = 7.7, 1.2 Hz, 1H), 7.79 – 7.74 (m, 2H), 7.66 (dd,  $J$  = 7.7, 1.2 Hz, 1H), 7.62 – 7.56 (m, 2H), 7.47 (t,  $J$  = 7.7 Hz, 2H), 3.92 (s, 3H), 3.71 (s, 3H);  $^{13}\text{C NMR}$  (100 MHz,  $\text{CDCl}_3$ )  $\delta$  195.6, 167.9, 166.3, 138.6, 136.7, 134.6, 133.6, 132.6, 132.1, 130.7, 130.2, 129.5, 128.6, 52.9, 52.8; **IR** (KBr,  $\text{cm}^{-1}$ ) 2950, 1729, 1665, 1583, 1441, 1364, 1263, 1146, 1108, 1064, 945, 914, 755, 693, 649, 571; **HRMS** (ESI) Calcd for  $\text{C}_{17}\text{H}_{14}\text{NaO}_5$  ( $\text{M}+\text{Na}$ ) $^+$  321.0733, found 321.0730.

#### Diethyl 3-benzoylphthalate (4b)

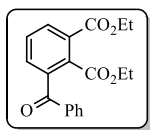

White solid, m.p. = 128-129 °C, purified by chromatography (petroleum/ethyl acetate = 6/1),  $R_f$  = 0.4, 42 mg, yield = 69%;  $^1\text{H NMR}$  (400 MHz,  $\text{CDCl}_3$ )  $\delta$  8.03 (dd,  $J$  = 7.6, 1.4 Hz, 1H), 7.81 – 7.74 (m, 2H), 7.64 – 7.54 (m, 3H), 7.46 (t,  $J$  = 7.7 Hz, 2H), 4.37 (q,  $J$  = 7.1 Hz, 2H), 4.13 (q,  $J$  = 7.2 Hz, 2H), 1.37 (t,  $J$  = 7.1 Hz, 3H), 1.17 (t,  $J$  = 7.2 Hz, 3H);  $^{13}\text{C NMR}$  (100 MHz,  $\text{CDCl}_3$ )  $\delta$  195.7, 167.3, 166.2, 138.9, 136.7, 134.4, 133.6, 132.1, 131.9, 131.3, 130.2, 129.4, 128.6, 62.1, 62.0, 14.2, 13.7; **IR** (KBr,  $\text{cm}^{-1}$ ) 2918, 1724, 1668, 1596, 1579, 1447, 1387, 1366, 1262, 1207, 1145, 1109, 1065, 1018, 976, 871, 763, 720, 701, 650, 457, 444, 431, 418; **HRMS** (ESI) Calcd for  $\text{C}_{19}\text{H}_{18}\text{NaO}_5$  ( $\text{M}+\text{Na}$ ) $^+$  349.1046, found 349.1043.

#### Dimethyl 2-benzoyl-[1,1'-biphenyl]-3,4-dicarboxylate (4c)

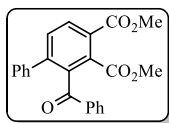

White solid, m.p. = 133-134 °C, purified by chromatography (petroleum/ethyl acetate = 6/1),  $R_f$  = 0.4, 47 mg, yield = 67%;  $^1\text{H NMR}$  (400 MHz,  $\text{CDCl}_3$ )  $\delta$  8.08 (d,  $J$  = 8.1 Hz, 1H), 7.55 (d,  $J$  = 8.1 Hz, 1H), 7.51 (d,  $J$  = 7.5 Hz, 2H), 7.36 (t,  $J$  = 7.4 Hz, 1H), 7.23 – 7.15 (m, 7H), 3.93 (s, 3H), 3.69 (s, 3H);  $^{13}\text{C NMR}$  (100 MHz,  $\text{CDCl}_3$ )  $\delta$  197.1, 168.0, 166.3, 144.5, 138.5, 138.5, 137.2, 134.3, 133.2, 131.4, 130.9, 129.5, 129.1, 128.6, 128.4, 128.3, 128.2, 52.9, 52.8; **IR** (KBr,  $\text{cm}^{-1}$ ) 2952, 1730, 1669, 1588, 1498, 1449, 1433, 1398, 1306, 1243, 1196, 1154, 1131, 1067, 1000, 941, 914, 837, 798, 763, 745, 699, 649, 523, 457, 418; **HRMS** (ESI) Calcd for  $\text{C}_{23}\text{H}_{18}\text{NaO}_5$  ( $\text{M}+\text{Na}$ ) $^+$  397.1046, found 397.1042.

#### Dimethyl 2-(4-methoxybenzoyl)-[1,1'-biphenyl]-3,4-dicarboxylate (4d)

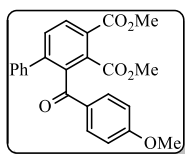

Light yellow solid, m.p. = 135-136 °C, purified by chromatography (petroleum/ethyl acetate = 6/1),  $R_f$  = 0.5, 47 mg, yield = 70%;  $^1\text{H NMR}$  (400 MHz,  $\text{CDCl}_3$ )  $\delta$  8.06 (d,  $J$  = 8.1 Hz, 1H), 7.55 (d,  $J$  = 8.1 Hz, 1H), 7.51 (d,  $J$  = 8.8 Hz, 2H), 7.25 – 7.17 (m, 5H), 6.70 (d,  $J$  = 8.9 Hz, 2H), 3.93 (s, 3H), 3.77 (s, 3H), 3.70 (s, 3H);  $^{13}\text{C NMR}$  (100 MHz,  $\text{CDCl}_3$ )  $\delta$  195.4, 168.1, 166.3, 163.7, 144.3, 138.7, 138.6, 134.2, 132.0, 131.4, 130.7, 130.4, 129.0, 128.5, 128.4, 128.3, 113.6, 55.5, 52.9, 52.8; **IR** (KBr,  $\text{cm}^{-1}$ ) 2952, 2921, 2847, 1795, 1727, 1657, 1594, 1574, 1542, 1508, 1433, 1397, 1305, 1250, 1196, 1180, 1158, 1130, 1067, 1026, 964, 939, 912, 834, 811, 787, 699, 648, 556, 522, 455, 418; **HRMS** (ESI) Calcd for  $\text{C}_{24}\text{H}_{20}\text{NaO}_6$  ( $\text{M}+\text{Na}$ ) $^+$  427.1152, found 427.1155.

#### Dimethyl 1-benzoyl-5,6,7,8-tetrahydronaphthalene-2,3-dicarboxylate (4e)

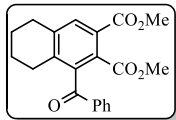

Yellow viscous oil, purified by chromatography (petroleum/ethyl acetate = 6/1),  $R_f$  = 0.4, 32 mg, yield = 54%;  $^1\text{H NMR}$  (400 MHz,  $\text{CDCl}_3$ )  $\delta$  7.76 (d,  $J$  = 7.2 Hz, 2H), 7.64 (s, 1H), 7.59 – 7.55 (m, 1H), 7.44 (t,  $J$  = 7.7 Hz, 2H), 3.87 (s, 3H), 3.54 (s, 3H), 2.87 (t,  $J$  = 6.2 Hz, 2H), 2.52 (t,  $J$  = 5.8 Hz, 2H), 1.81 – 1.74 (m, 2H), 1.73 – 1.67 (m, 2H);  $^{13}\text{C NMR}$  (100 MHz,  $\text{CDCl}_3$ )  $\delta$  197.5, 167.6, 167.3, 140.9, 139.8, 138.6, 137.0, 133.8, 131.1, 129.5, 129.0, 128.8, 128.1, 52.7, 52.5, 29.9, 27.3, 22.5, 22.2; **IR** (KBr,  $\text{cm}^{-1}$ ) 2936, 2358, 1730, 1673, 1568, 1444, 1272, 1232, 1146, 1060, 914, 749, 695; **HRMS** (ESI) Calcd for  $\text{C}_{21}\text{H}_{20}\text{NaO}_5$  ( $\text{M}+\text{Na}$ ) $^+$  375.1203, found 375.1202.

## 1.6 General procedure for the synthesis of **6**

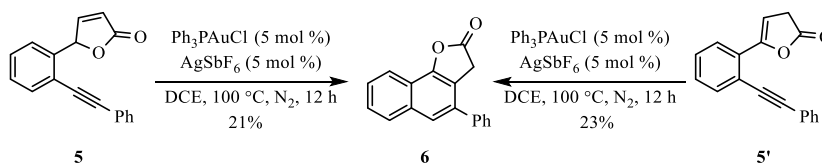

In a Schlenk tube with a magnetic bar under nitrogen atmosphere was added  $\text{Ph}_3\text{PAuCl}$  (5 mol %) and  $\text{AgSbF}_6$  (5 mol %) in 1,2-dichloroethane (DCE, 2 mL), and then the substrates **5** or **5'** (0.2 mmol) was added. The mixture was stirred at 100 °C until the starting materials was completely consumed (monitored by TLC). After that, the mixture was filtered by short silica, the solvent was evaporated by rotary evaporator, and the residue was purified by flash column chromatography on silica gel using petroleum ether and ethyl acetate as elute to afford the pure product **6**.

### 4-phenylnaphtho[1,2-b]furan-2(3H)-one (**6**)

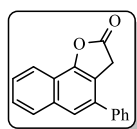

Pale yellow viscous oil, purified by chromatography (petroleum/ethyl acetate = 10/1),  $R_f$  = 0.6, 10 mg, yield = 21%;  $^1\text{H}$  NMR (400 MHz,  $\text{CDCl}_3$ )  $\delta$  8.09 – 8.01 (m, 1H), 7.93 – 7.87 (m, 1H), 7.71 (s, 1H), 7.59 – 7.48 (m, 6H), 7.45 – 7.41 (m, 1H), 3.99 (s, 2H);  $^{13}\text{C}$  NMR (100 MHz,  $\text{CDCl}_3$ )  $\delta$  174.5, 150.7, 139.3, 135.8, 134.2, 129.1, 128.4, 128.2, 128.1, 127.3, 126.9, 123.3, 121.2, 119.2, 116.5, 34.4; IR (KBr,  $\text{cm}^{-1}$ ) 3839, 3821, 3802, 3749, 3649, 3616, 3309, 2923, 2851, 1805, 1717, 1700, 1650, 1557, 1540, 1521, 1493, 1457, 1370, 1341, 1236, 1186, 1123, 1054, 907, 829, 748, 699; HRMS (DART) Calcd for  $\text{C}_{18}\text{H}_{13}\text{O}_2$  ( $\text{M}+\text{H}$ ) $^+$  261.0910, found 261.0910.

## 1.7 Gram-scale reaction

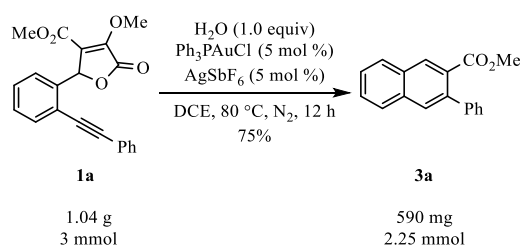

## 1.8 General procedure for derivatization reaction of **3a**

### 1.8.1 Procedure for the synthesis of **7**.

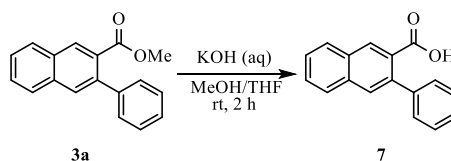

In a 25 mL flask with a magnetic bar was added MeOH (1.2 mL), THF (1 mL), and then the **3a** (1 mmol) and Potassium hydroxide saturated solution (1 mL) were added respectively. The mixture was stirred at room temperature until the starting materials was completely consumed (monitored by TLC). After that,

added 1 M aqueous solution of hydrochloric acid to neutralize the solution until the PH < 3. And then, the mixture was filtered by Buchner funnel and the residue was washed with methanol (10 ml × 3), oven dry the residue to afford the carboxylic acid product **7** (246 mg, 99%) as a white solid.

### 3-phenyl-2-naphthoic acid (**7**)

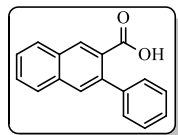

the literature.<sup>9</sup>

<sup>1</sup>H NMR (400 MHz, CDCl<sub>3</sub>) δ 8.57 (s, 1H), 7.96 (d, *J* = 8.0 Hz, 1H), 7.88 (d, *J* = 8.1 Hz, 1H), 7.82 (s, 1H), 7.64 – 7.55 (m, 2H), 7.49 – 7.36 (m, 5H); <sup>13</sup>C NMR (100 MHz, CDCl<sub>3</sub>) δ 173.4, 141.4, 139.3, 134.9, 132.6, 131.6, 130.4, 128.9, 128.8, 128.2, 127.9, 127.7, 127.3, 127.0. Spectral data of product **7** was consistent with data reported in

### 1.8.2 Procedure for the synthesis of **8**.

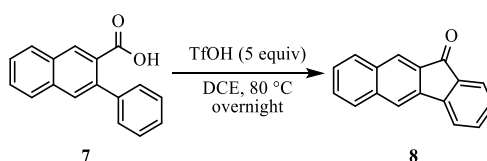

In a 25 ml Schlenk tube with a magnetic bar under nitrogen atmosphere was added DCE (1 mL), and then the 3-phenyl-2-naphthoic acid **7** (0.2 mmol, 1.0 equiv) and trifluoromethanesulfonic acid (1 mmol, 5.0 equiv) were added respectively. The mixture was stirred at 80 °C until the starting materials was completely consumed (monitored by TLC). After that, the solution was allowed to warm up to room temperature. The reaction mixture was quenched with saturated NaHCO<sub>3</sub> (aq), the separated aqueous phase was extracted with ethyl acetate, and the combined organic layers was washed saturated sodium chloride solution then dried over Na<sub>2</sub>SO<sub>4</sub>. The mixture was filtered and concentrated, the resulting residue was purified by flash column chromatography on silica gel to afford the pure product **8** (44.6 mg, 97%).

### 11H-benzo[b]fluoren-11-one (**8**)

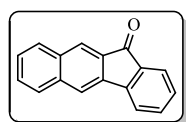

<sup>1</sup>H NMR (400 MHz, CDCl<sub>3</sub>) δ 8.03 (s, 1H), 7.77 (d, *J* = 8.0 Hz, 1H), 7.70 (d, *J* = 10.3 Hz, 2H), 7.66 (d, *J* = 7.5 Hz, 1H), 7.57 (d, *J* = 7.5 Hz, 1H), 7.48 – 7.43 (m, 2H), 7.41 – 7.36 (m, 1H), 7.28 – 7.24 (m, 1H); <sup>13</sup>C NMR (100 MHz, CDCl<sub>3</sub>) δ 193.0, 144.8, 138.3, 136.9, 136.1, 134.9, 133.6, 132.7, 130.8, 129.2, 128.9, 128.8, 126.9, 125.6, 124.4, 121.0, 119.1. Spectral data of product **8** was consistent with data reported in the literature.<sup>10</sup>

### 1.8.3 Procedure for the synthesis of **9**.

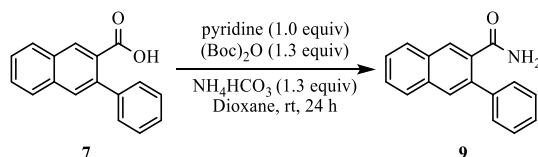

In a 25 ml Schlenk tube with a magnetic bar, to a mixture of 3-phenyl-2-naphthoic acid **7** (0.2 mmol, 1.0 equiv) and di-tert-butyl dicarbonate (0.26 mmol, 1.3 equiv) in dioxane (2 mL) was added pyridine (0.2 mmol, 1.0 equiv). After stirring at room temperature for 15 min, ammonium hydrogen carbonate (0.26 mmol, 1.3 equiv) was added. Then, the mixture was stirred at room temperature for 24 h. After that,

the reaction mixture was diluted with water and the resulting precipitate was collected, washed with water, dried and purified by flash column chromatography on silica gel using dichloromethane and methanol (DCM/MeOH = 20/1) as the eluent to afford the pure product **9** (40 mg, 81%).

### 3-phenyl-2-naphthamide (**9**)

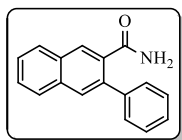

**<sup>1</sup>H NMR** (400 MHz, CDCl<sub>3</sub>)  $\delta$  8.32 (s, 1H), 7.91 (d,  $J$  = 7.8 Hz, 1H), 7.85 (d,  $J$  = 7.9 Hz, 1H), 7.80 (s, 1H), 7.59 – 7.50 (m, 4H), 7.49 – 7.36 (m, 3H), 5.92 (s, 1H), 5.43 (s, 1H); **<sup>13</sup>C NMR** (100 MHz, CDCl<sub>3</sub>)  $\delta$  171.3, 140.4, 137.0, 134.1, 132.6, 132.0, 129.8, 129.7, 129.1, 128.8, 128.6, 128.0, 127.9, 127.8, 126.9. Spectral data of product **9** was consistent with data reported in the literature.<sup>11</sup>

### 1.8.4 Procedure for the synthesis of **10**.

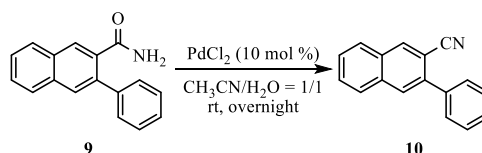

In a 25 ml Schlenk tube with a magnetic bar, **9** (0.2 mmol) in a mixture of H<sub>2</sub>O/CH<sub>3</sub>CN = 1:1 (2 mL) was treated with PdCl<sub>2</sub> (0.02 mmol) at room temperature for overnight. The reaction mixture was quenched with water and extracted with diethyl ether. The solvent was removed in vacuo and the residual was separated on a silica gel column using petroleum ether and ethyl acetate (petroleum/ethyl acetate = 6/1) as the eluent to give **10** (39 mg, 85%) as a white solid.

### 3-phenyl-2-naphthonitrile (**10**)

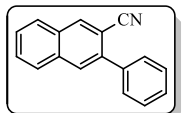

**<sup>1</sup>H NMR** (400 MHz, CDCl<sub>3</sub>)  $\delta$  8.32 (s, 1H), 7.91 – 7.86 (m, 3H), 7.66 – 7.61 (m, 3H), 7.60 – 7.56 (m, 1H), 7.53 – 7.48 (m, 2H), 7.47 – 7.43 (m, 1H); **<sup>13</sup>C NMR** (100 MHz, CDCl<sub>3</sub>)  $\delta$  139.8, 138.4, 136.0, 134.9, 131.3, 129.5, 129.2, 129.1, 128.8, 128.6, 128.2, 128.1, 127.6, 119.0, 109.6. Spectral data of product **10** was consistent with data reported in the literature.<sup>12</sup>

### 1.8.5 Procedure for the synthesis of **11**.

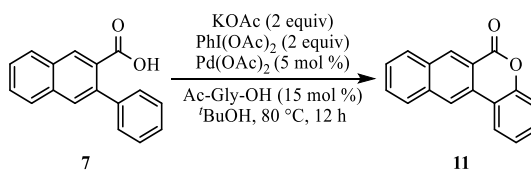

In a 25 ml Schlenk tube with a magnetic bar, 2.0 ml *t*BuOH was added to a mixture of 3-phenyl-2-naphthoic acid **7** (0.2 mmol, 1.0 equiv), Pd(OAc)<sub>2</sub> (0.01 mmol, 5 mol %), N-acetylglycin (0.03 mmol, 15 mol %), KOAc (0.4 mmol, 2.0 equiv), PhI(OAc)<sub>2</sub> (0.4 mmol, 2.0 equiv) under air. The mixture was stirred at 80 °C for 12 h. After cooling to room temperature, the mixture was concentrated under vacuum and the residue was purified by flash column chromatography on silica gel to afford the pure product **11** (37 mg, 75%).



### 6H-naphtho[2,3-c]chromen-6-one (**11**)

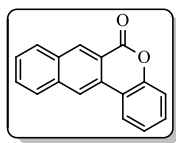

**<sup>1</sup>H NMR** (400 MHz, CDCl<sub>3</sub>)  $\delta$  8.99 (s, 1H), 8.51 (s, 1H), 8.21 – 8.18 (m, 1H), 8.01 (dd,  $J$  = 11.9, 8.4 Hz, 2H), 7.70 – 7.65 (m, 1H), 7.61 – 7.56 (m, 1H), 7.49 – 7.44 (m, 1H), 7.38 – 7.34 (m, 2H); **<sup>13</sup>C NMR** (100 MHz, CDCl<sub>3</sub>)  $\delta$  161.4, 150.8, 136.2, 132.8, 132.4, 130.1, 129.6, 129.5, 129.5, 128.0, 127.1, 124.6, 122.8, 120.6, 119.2, 118.3, 117.9. Spectral data of product **11** was consistent with data reported in the literature.<sup>13</sup>

### 1.9 The reaction of **1a** with methanol to form **12**

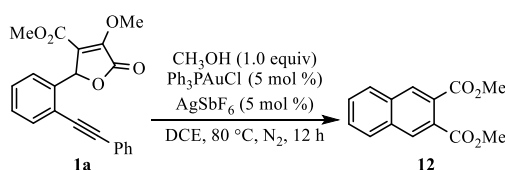

In a Schlenk tube with a magnetic bar under nitrogen atmosphere was added Ph<sub>3</sub>PAuCl (5 mol %) and AgSbF<sub>6</sub> (5 mol %) in 1,2-dichloroethane (DCE, 2 mL), and then the substrates **1a** (0.2 mmol) and CH<sub>3</sub>OH (0.2 mmol) were added. The mixture was stirred at 80 °C until the starting materials was completely consumed (monitored by TLC). After that, the mixture was filtered by short silica, the solvent was evaporated by rotary evaporator, and the residue was purified by flash column chromatography on silica gel using petroleum ether and ethyl acetate as elute to afford the pure product **12** as a colorless oil (32 mg, yield = 65%), accompanied with the release of methyl benzoate.

### Dimethyl naphthalene-2,3-dicarboxylate (**12**)

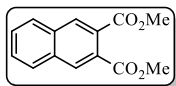

Colorless oil, purified by chromatography (petroleum/ethyl acetate = 10/1),  $R_f$  = 0.5, 32 mg, yield = 65%; **<sup>1</sup>H NMR** (400 MHz, CDCl<sub>3</sub>)  $\delta$  8.26 (s, 2H), 7.96 – 7.89 (m, 2H), 7.66 – 7.59 (m, 2H), 3.96 (s, 6H); **<sup>13</sup>C NMR** (100 MHz, CDCl<sub>3</sub>)  $\delta$  168.3, 133.6, 130.3, 128.8, 128.7, 128.6, 52.8. Spectral data of product **12** was consistent with data reported in the literature.<sup>14</sup>

### Methyl benzoate

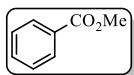

**<sup>1</sup>H NMR** (400 MHz, CDCl<sub>3</sub>)  $\delta$  8.04 (d,  $J$  = 7.9 Hz, 2H), 7.55 (t,  $J$  = 7.4 Hz, 1H), 7.43 (t,  $J$  = 7.6 Hz, 2H), 3.91 (s, 3H); **<sup>13</sup>C NMR** (100 MHz, CDCl<sub>3</sub>)  $\delta$  167.2, 133.0, 130.3, 129.7, 128.5, 52.2. Spectral data of product **12** was consistent with data reported in the literature.<sup>15</sup>

## 2. References:

- [1] Zhu, S.; Huang, H.; Zhang, Z.; Ma, T.; Jiang, H. *J. Org. Chem.* **2014**, *79*, 6113.
- [2] Bayat, M.; Imanieh, H.; Hassanzadeh, F. *Tetrahedron Lett.* **2010**, *51*, 1873.
- [3] Zhu, S.; Huang, X.; Zhao, T.; Ma, T.; Jiang, H. *Org. Biomol. Chem.* **2015**, *13*, 1225.
- [4] Zhan, F.; Liang, G.; *Angew. Chem., Int. Ed.* **2013**, *52*, 1266.
- [5] Eißler, S.; Bogner, T.; Nahrwold, M.; Sewald, N. *Chem. Eur. J.* **2009**, *15*, 11273.
- [6] Browne, D. M.; Niyomura, O.; Wirth, T. *Org. Lett.* **2007**, *9*, 3169.
- [7] Kim, K. H.; Lee, H. S.; Kim, S. H.; Kim, S. H.; Kim, J. N. *Chem. Eur. J.* **2010**, *16*, 2375.
- [8] Huang, L.; Hackenberger, D.; Gooßen, L. J. *Angew. Chem., Int. Ed.* **2015**, *54*, 12607.
- [9] Chiong, H.; Pham, Q.; Daugulis, O. *J. Am. Chem. Soc.* **2007**, *129*, 9879.
- [10] Sun, D.; Li, B.; Lan, J.; Huang, Q.; You, J. *Chem. Commun.* **2016**, *52*, 3635.
- [11] Ilies L.; Konno, E.; Chen, Q.; Nakamura, E. *Asian J. Org. Chem.* **2012**, *1*, 142.
- [12] Wang, J.; Xiang, J.; Wang, M.; Guan, J.; Wu, A. *Tetrahedron*, **2014**, *70*, 1412.
- [13] Li Y.; Ding, Y.; Wang, J.; Su, Y.; Wang, X. *Org. Lett.* **2013**, *15*, 2574.
- [14] Sanguinet, L.; Williams, J. C.; Yang, Z.; Twieg, R. J.; Mao, G.; Singer, K. D.; Wiggers, G.; Petschek, R. G. *Chem. Mater.* **2006**, *18*, 4259.
- [15] Yasukawa, N.; Asai, S.; Kato, M.; Monguchi, Y.; Sajiki, H.; Sawama, Y. *Org. Lett.* **2016**, *18*, 5604.

### 3. X-ray diffraction analysis

#### 3.1 Crystal data and structure refinement for 1e

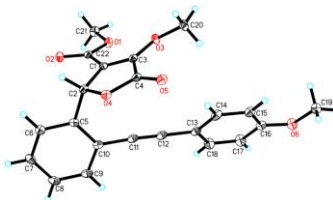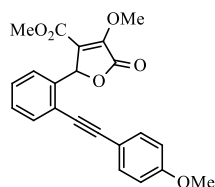

|                                      |                                                               |                            |
|--------------------------------------|---------------------------------------------------------------|----------------------------|
| Identification code                  | <b>1e</b>                                                     |                            |
| Empirical formula                    | <b>C<sub>22</sub>H<sub>18</sub>O<sub>6</sub></b>              |                            |
| Formula weight                       | 378.36                                                        |                            |
| Temperature                          | 100.00(10) K                                                  |                            |
| Crystal system                       | Triclinic                                                     |                            |
| Space group                          | P-1                                                           |                            |
| Unit cell dimensions                 | a = 8.6474(5) Å                                               | $\alpha = 92.573(5)^\circ$ |
|                                      | b = 9.0011(6) Å                                               | $\beta = 94.393(5)^\circ$  |
|                                      | c = 11.6253(6) Å                                              | $\gamma = 91.114(5)^\circ$ |
| Volume                               | 901.06(9) Å <sup>3</sup>                                      |                            |
| Z                                    | 2                                                             |                            |
| $\rho_{\text{calc}}$                 | 1.395 g/cm <sup>3</sup>                                       |                            |
| $\mu$                                | 0.846 mm <sup>-1</sup>                                        |                            |
| F(000)                               | 396.0                                                         |                            |
| Crystal size                         | 0.32 x 0.25 x 0.2 mm <sup>3</sup>                             |                            |
| Radiation                            | Cu K $\alpha$ ( $\lambda = 1.54184$ )                         |                            |
| 2 $\theta$ range for data collection | 7.636 to 147.95 °                                             |                            |
| Index ranges                         | -10 ≤ h ≤ 10, -11 ≤ k ≤ 10, -14 ≤ l ≤ 14                      |                            |
| Reflections collected                | 5740                                                          |                            |
| Independent reflections              | 3517 [R <sub>int</sub> = 0.0282, R <sub>sigma</sub> = 0.0259] |                            |
| Data / restraints / parameters       | 3517 / 0 / 257                                                |                            |
| Goodness-of-fit on F <sup>2</sup>    | 1.040                                                         |                            |
| Final R indexes [I ≥ 2 $\sigma$ (I)] | R1 = 0.0479, wR2 = 0.1320                                     |                            |
| Final R indexes [all data]           | R1 = 0.0500, wR2 = 0.1338                                     |                            |
| Largest diff. peak/hole              | 0.28/-0.28 e.Å <sup>-3</sup>                                  |                            |

### 3.2 Crystal data and structure refinement for 3u

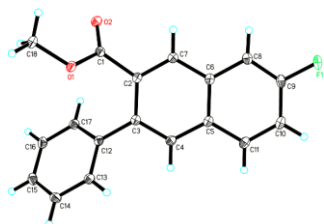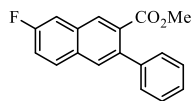

Identification code

**3u**

Empirical formula

$C_{18}H_{13}FO_2$

Formula weight

280.28

Temperature

100.00(10) K

Crystal system

Monoclinic

Space group

$P2_1/c$

Unit cell dimensions

$a = 16.1365(6) \text{ \AA}$

$\alpha = 90^\circ$

$b = 7.3743(3) \text{ \AA}$

$\beta = 103.140(4)^\circ$

$c = 11.6885(5) \text{ \AA}$

$\gamma = 90^\circ$

Volume

$1354.46(9) \text{ \AA}^3$

Z

4

$\rho_{\text{calc}}$

$1.374 \text{ g/cm}^3$

$\mu$

$0.807 \text{ mm}^{-1}$

$F(000)$

584.0

Crystal size

$0.2 \times 0.16 \times 0.14 \text{ mm}^3$

Radiation

$\text{Cu K}\alpha$  ( $\lambda = 1.54184$ )

$2\theta$  range for data collection

$11.262$  to  $146.96^\circ$

Index ranges

$-11 \leq h \leq 19$ ,  $-8 \leq k \leq 8$ ,  $-14 \leq l \leq 14$

Reflections collected

4809

Independent reflections

2639 [ $R_{\text{int}} = 0.0255$ ,  $R_{\text{sigma}} = 0.0300$ ]

Data / restraints / parameters

2639 / 0 / 191

Goodness-of-fit on  $F^2$

1.077

Final R indexes [ $I \geq 2\sigma(I)$ ]

$R1 = 0.0525$ ,  $wR2 = 0.1456$

Final R indexes [all data]

$R1 = 0.0553$ ,  $wR2 = 0.1499$

Largest diff. peak/hole

$0.27/-0.43 \text{ e.\AA}^{-3}$

### 3.3 Crystal data and structure refinement for 4a

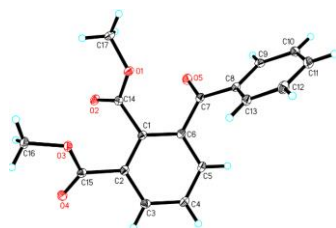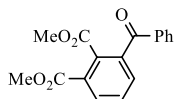

|                                   |                                                                    |                 |
|-----------------------------------|--------------------------------------------------------------------|-----------------|
| Identification code               | <b>4a</b>                                                          |                 |
| Empirical formula                 | <b>C<sub>17</sub>H<sub>14</sub>O<sub>5</sub></b>                   |                 |
| Formula weight                    | <b>298.28</b>                                                      |                 |
| Temperature                       | <b>100.00(10) K</b>                                                |                 |
| Crystal system                    | <b>Orthorhombic</b>                                                |                 |
| Space group                       | <b>P2<sub>1</sub>2<sub>1</sub>2<sub>1</sub></b>                    |                 |
| Unit cell dimensions              | <b>a = 8.36160(10) Å</b>                                           | <b>α = 90 °</b> |
|                                   | <b>b = 8.77830(10) Å</b>                                           | <b>β = 90 °</b> |
|                                   | <b>c = 19.3853(3) Å</b>                                            | <b>γ = 90 °</b> |
| Volume                            | <b>1422.89(3) Å<sup>3</sup></b>                                    |                 |
| Z                                 | <b>4</b>                                                           |                 |
| ρ <sub>calc</sub>                 | <b>1.392 g/cm<sup>3</sup></b>                                      |                 |
| μ                                 | <b>0.860 mm<sup>-1</sup></b>                                       |                 |
| F(000)                            | <b>624.0</b>                                                       |                 |
| Crystal size                      | <b>0.3 x 0.2 x 0.2 mm<sup>3</sup></b>                              |                 |
| Radiation                         | <b>Cu Kα (λ = 1.54184)</b>                                         |                 |
| 2θ range for data collection      | <b>9.124 to 147.318 °</b>                                          |                 |
| Index ranges                      | <b>-9 ≤ h ≤ 9, -10 ≤ k ≤ 10, -23 ≤ l ≤ 23</b>                      |                 |
| Reflections collected             | <b>3695</b>                                                        |                 |
| Independent reflections           | <b>2325 [R<sub>int</sub> = 0.0153, R<sub>sigma</sub> = 0.0196]</b> |                 |
| Data / restraints / parameters    | <b>2325 / 0 / 202</b>                                              |                 |
| Goodness-of-fit on F <sup>2</sup> | <b>1.152</b>                                                       |                 |
| Final R indexes [I ≥ 2σ (I)]      | <b>R1 = 0.0294, wR2 = 0.0801</b>                                   |                 |
| Final R indexes [all data]        | <b>R1 = 0.0298, wR2 = 0.0804</b>                                   |                 |
| Largest diff. peak/hole           | <b>0.26/-0.19 e.Å<sup>-3</sup></b>                                 |                 |
| Flack parameter                   | <b>0.14(10)</b>                                                    |                 |

#### 4. Copies of NMR spectra

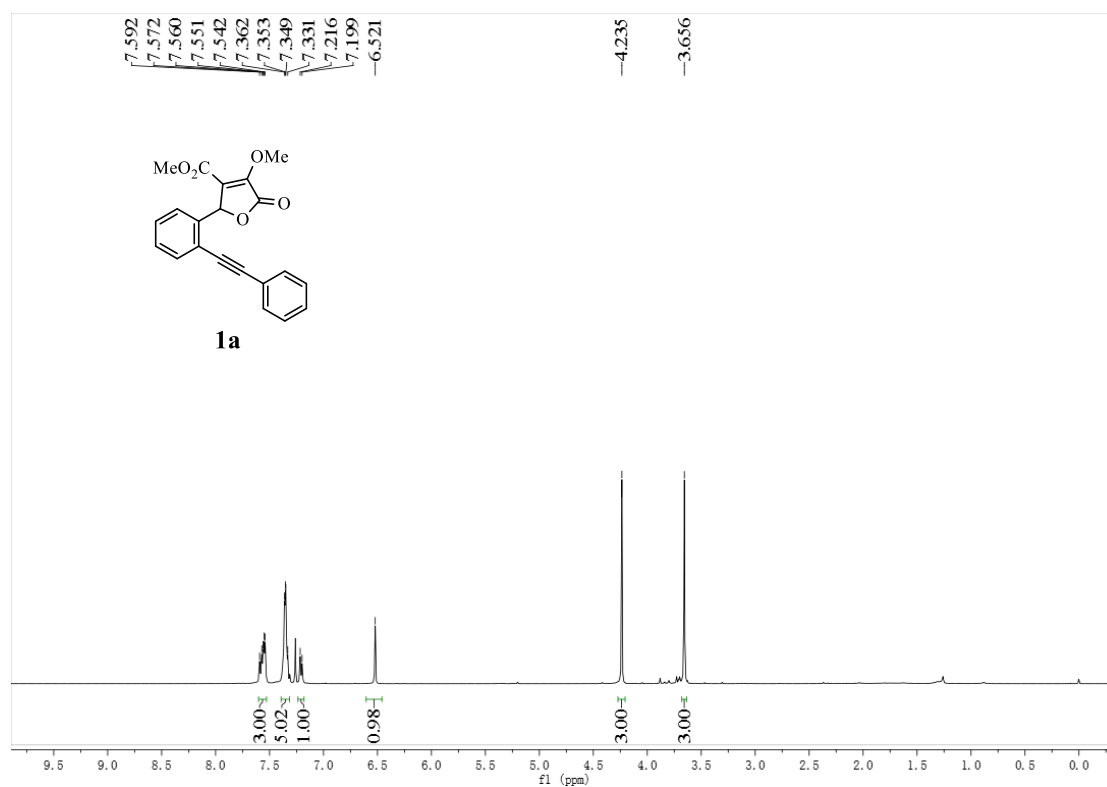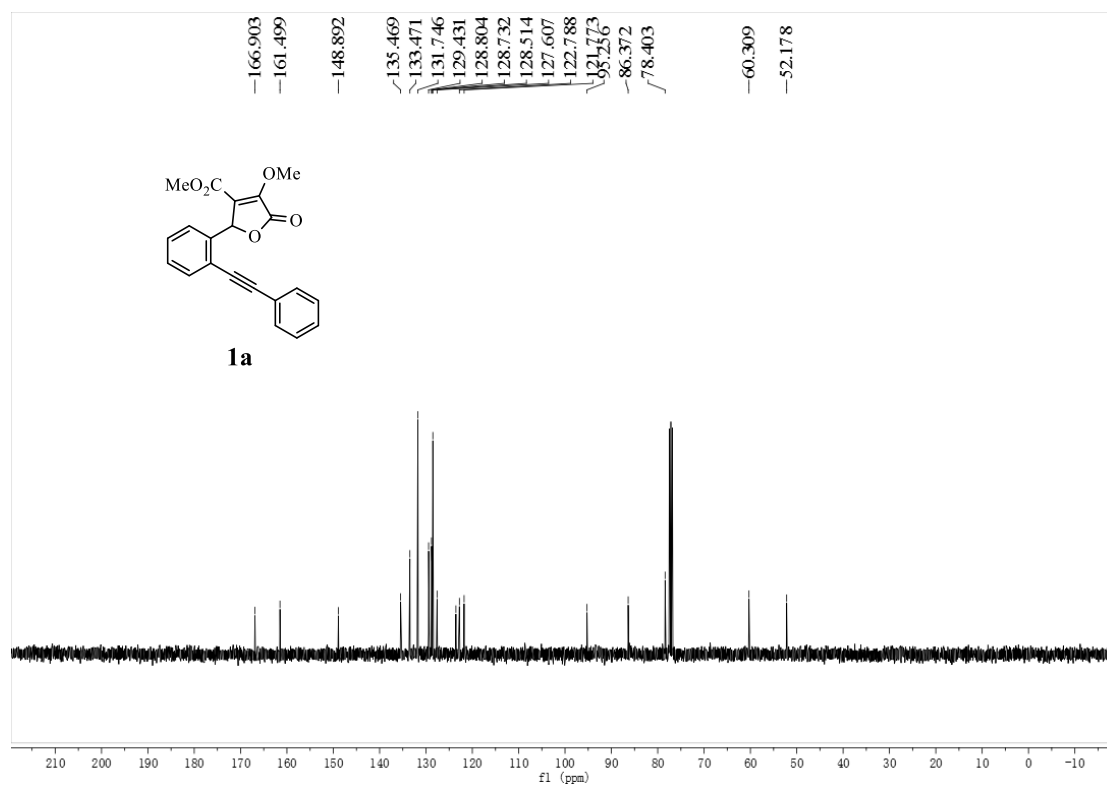

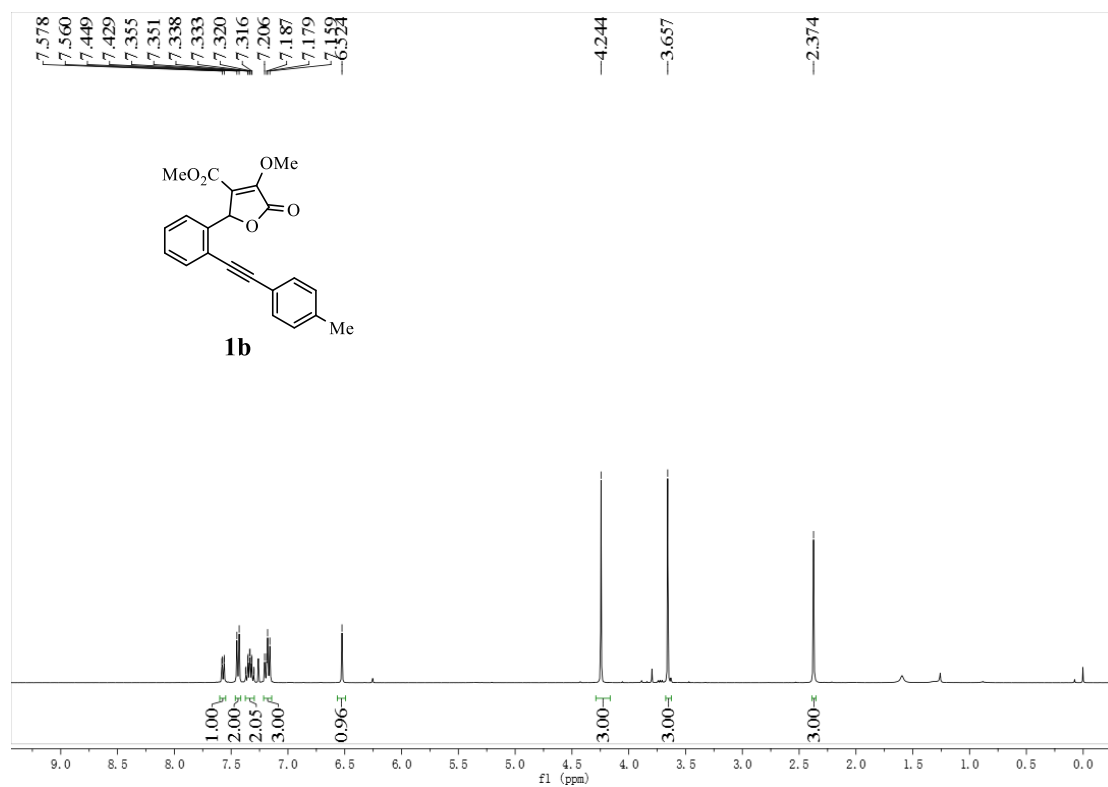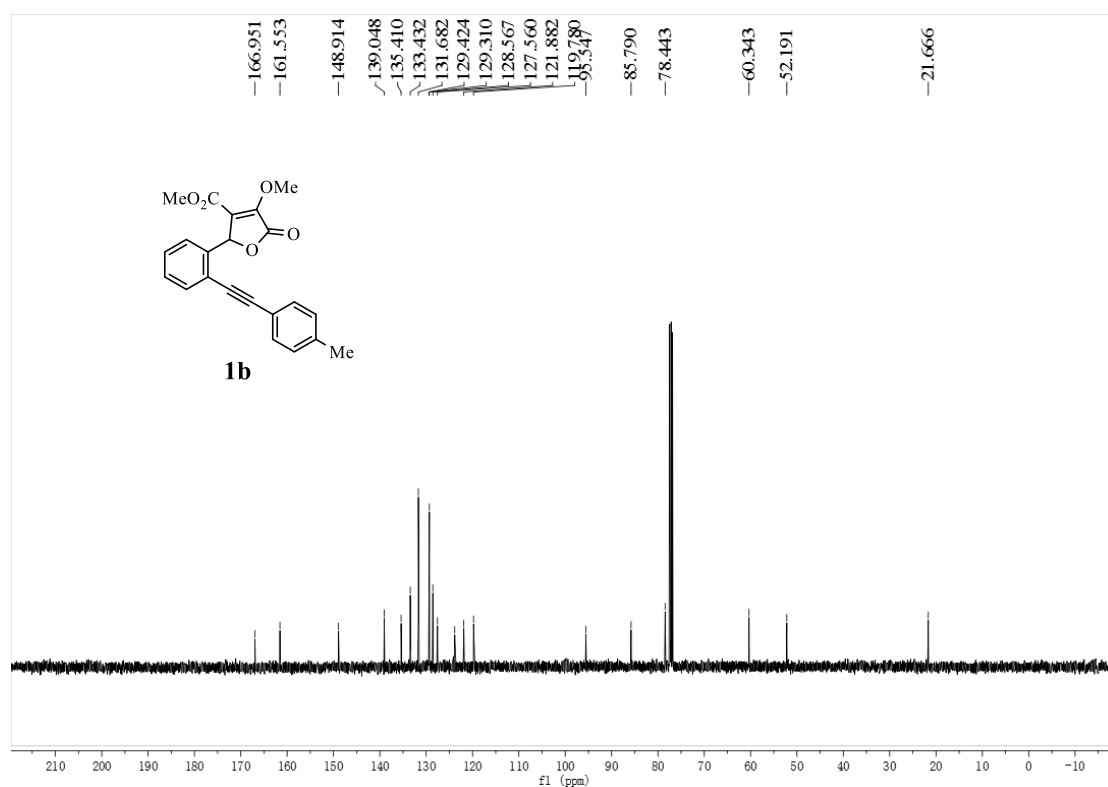

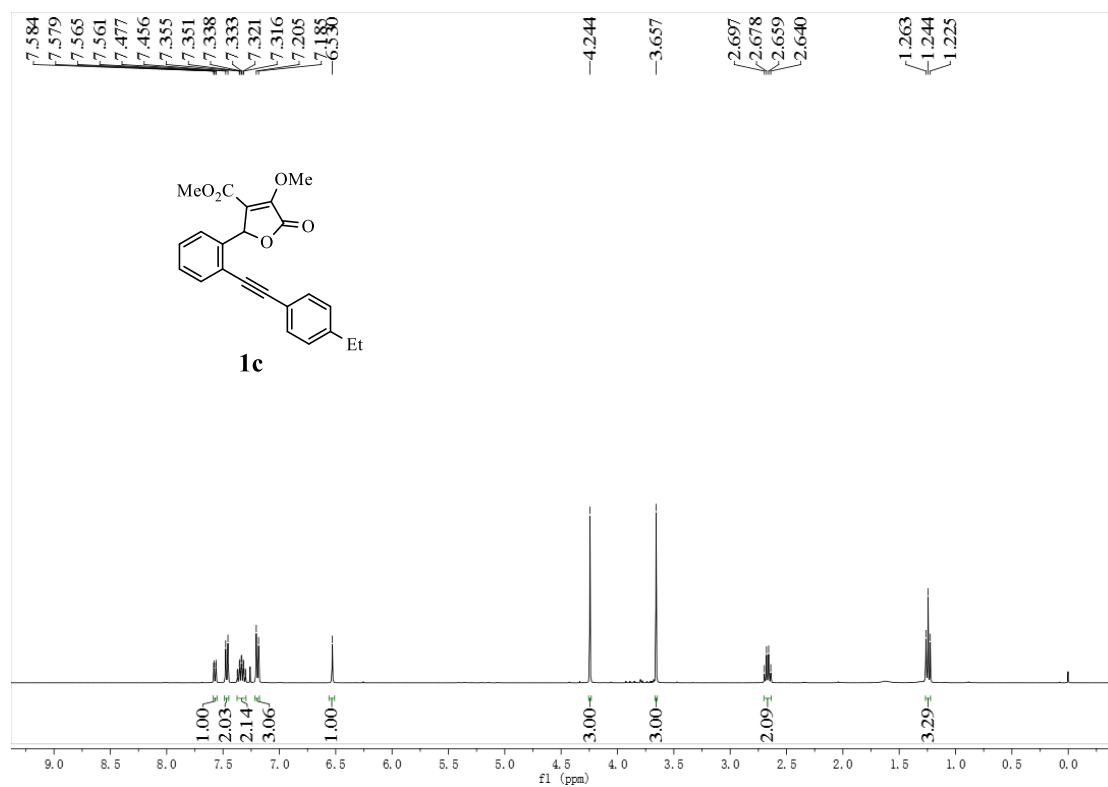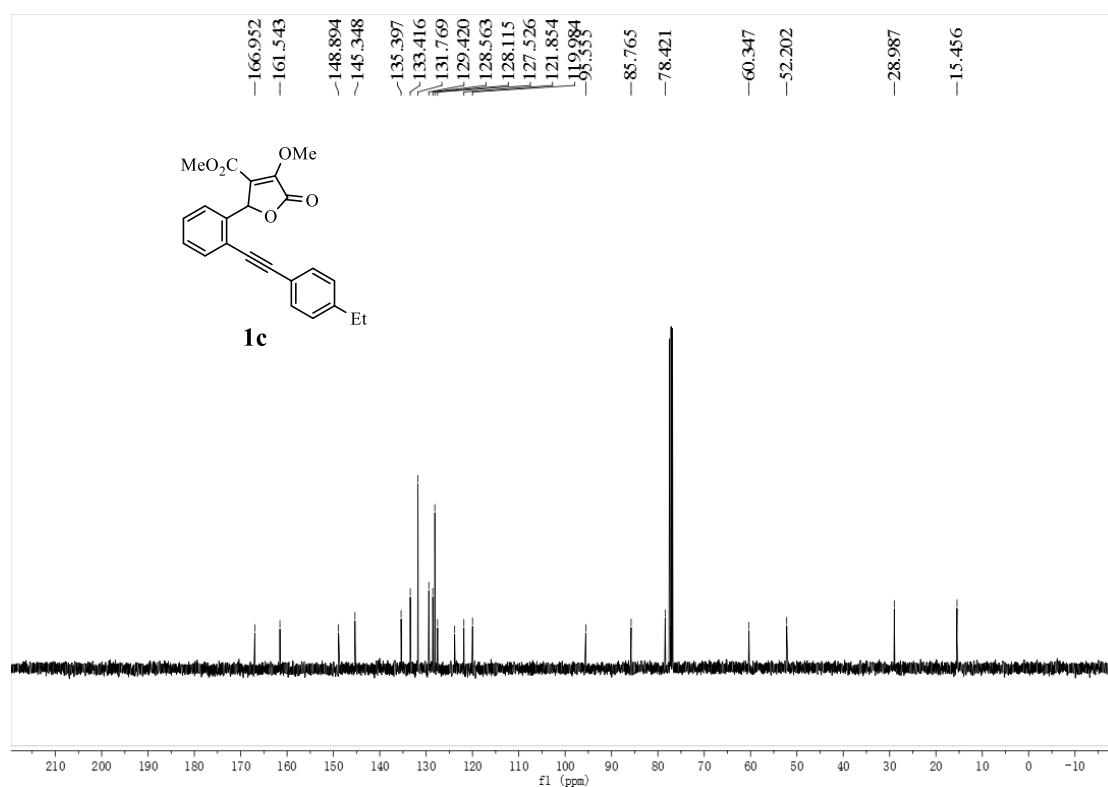



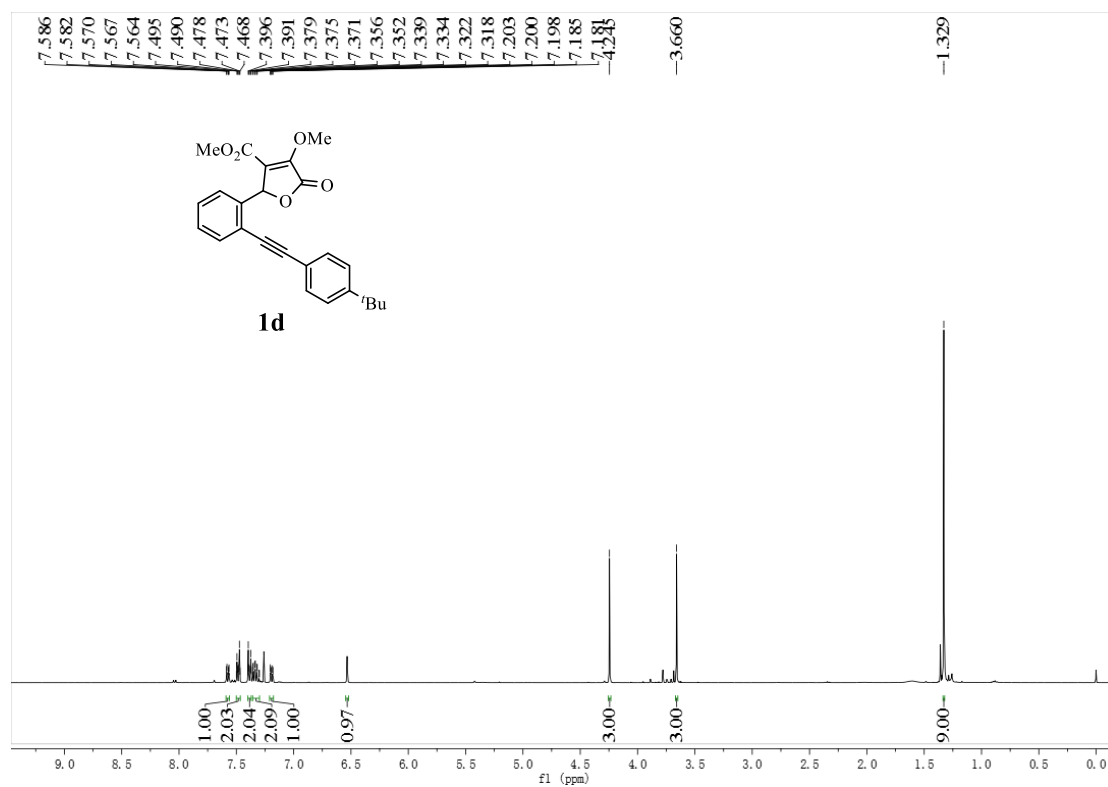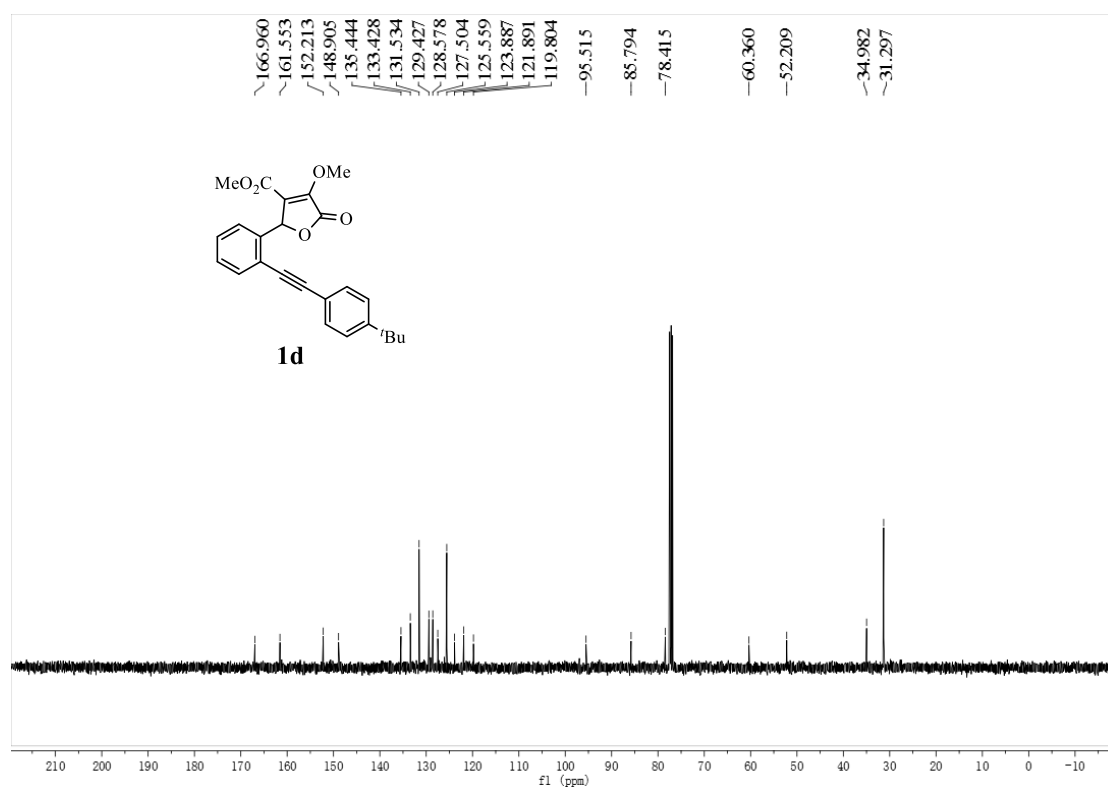

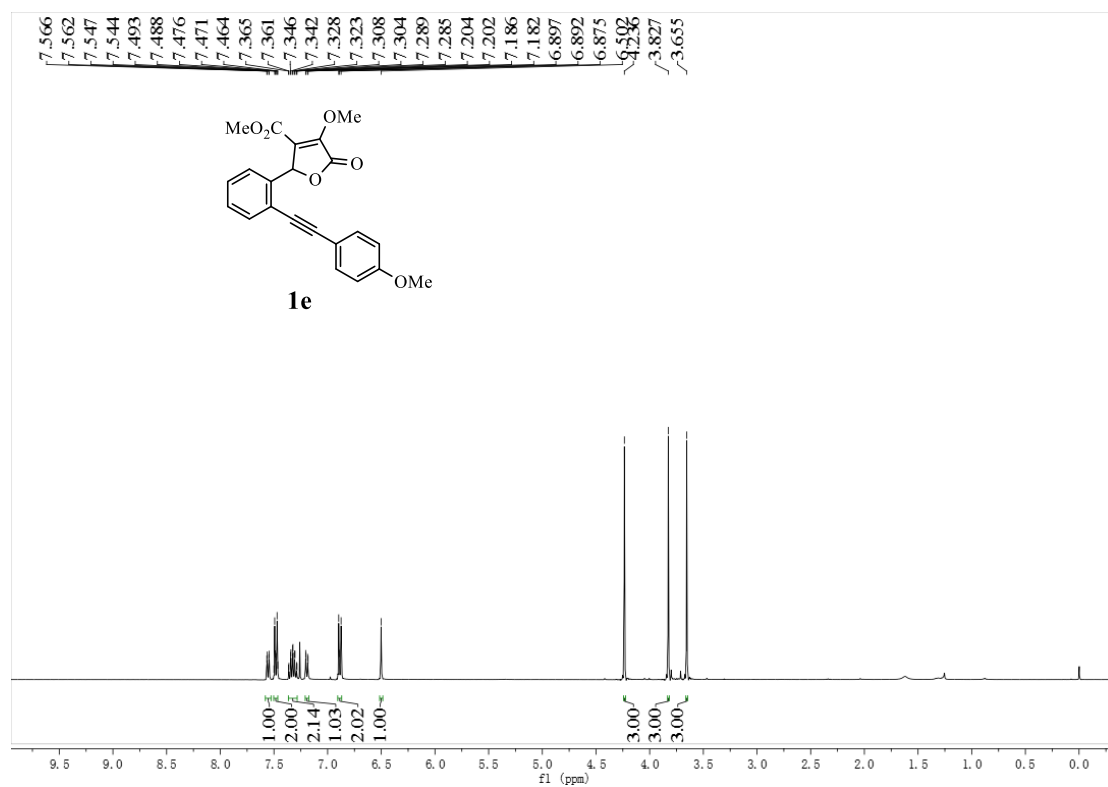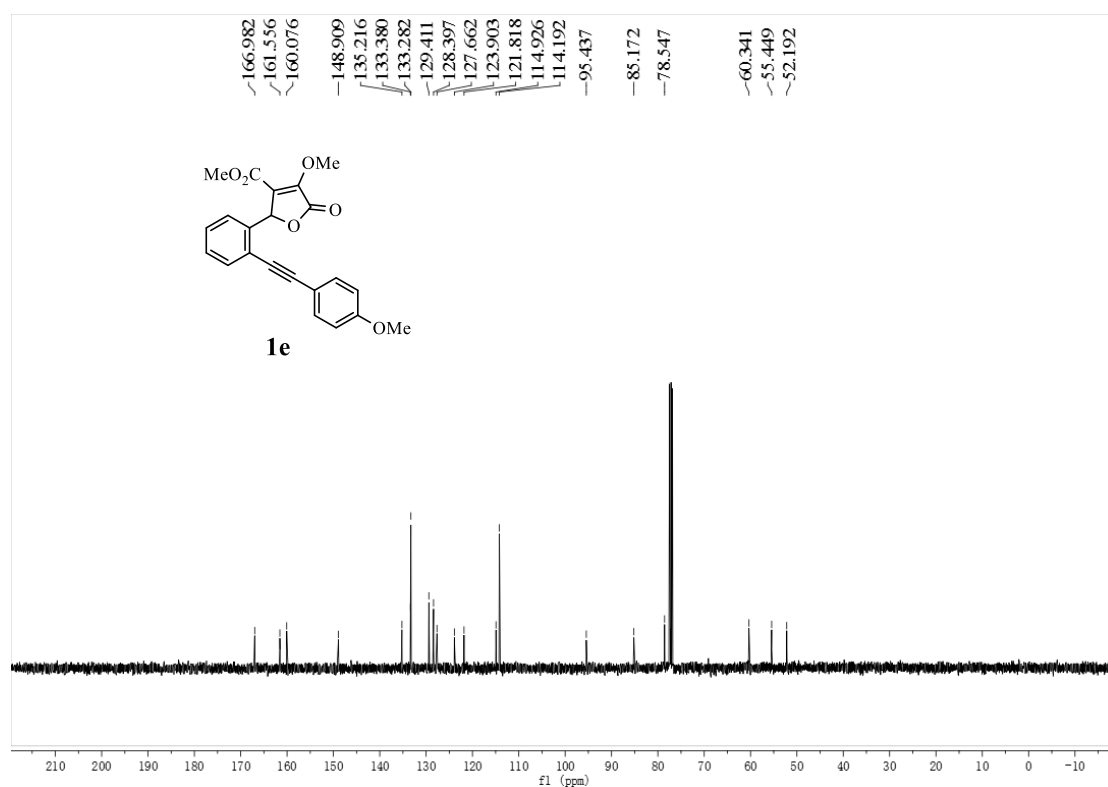

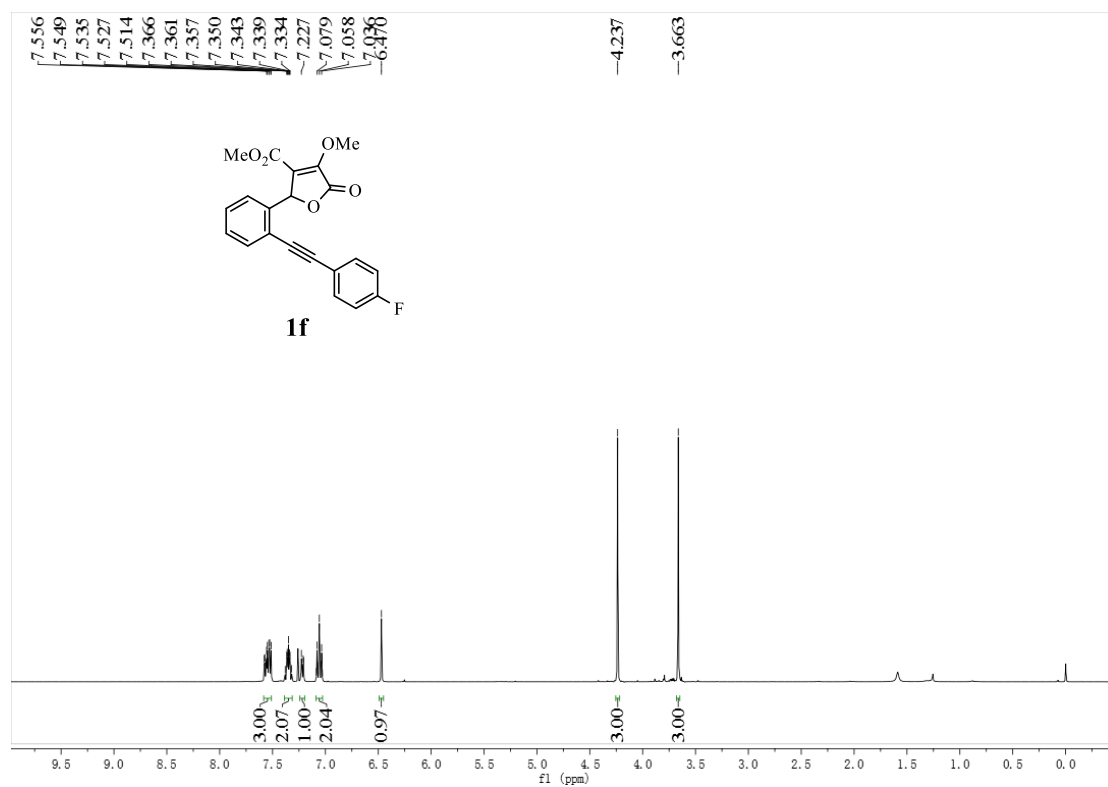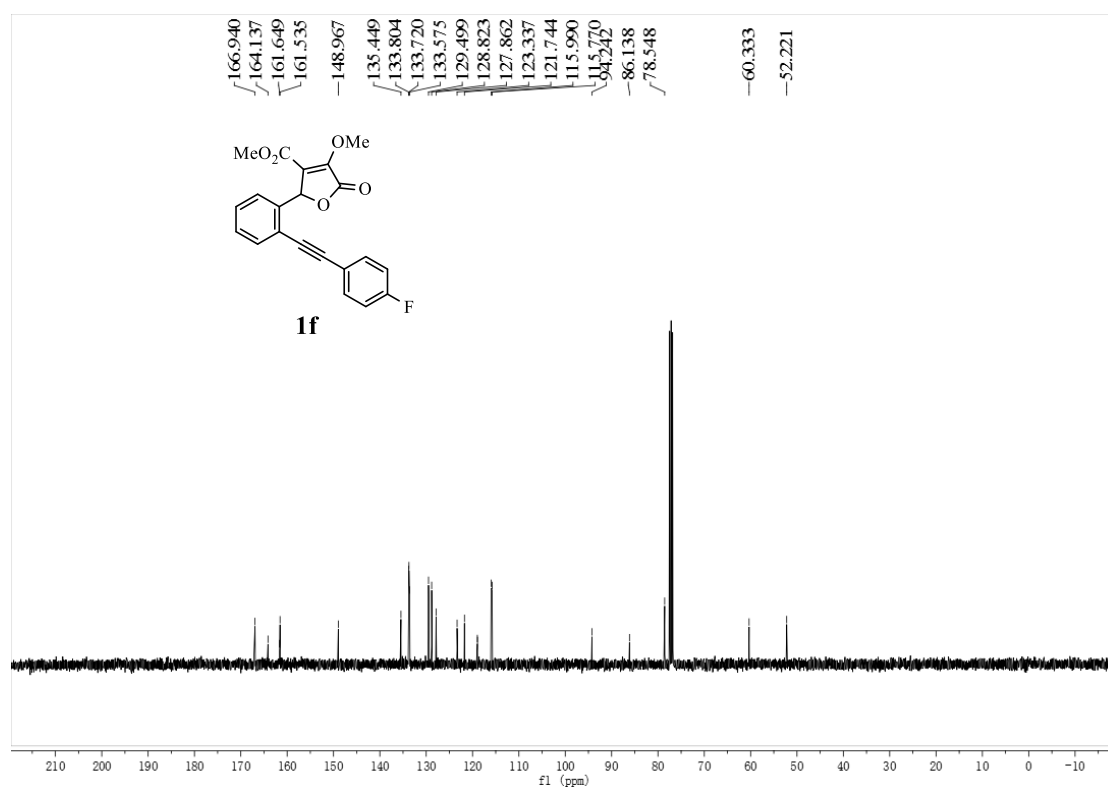

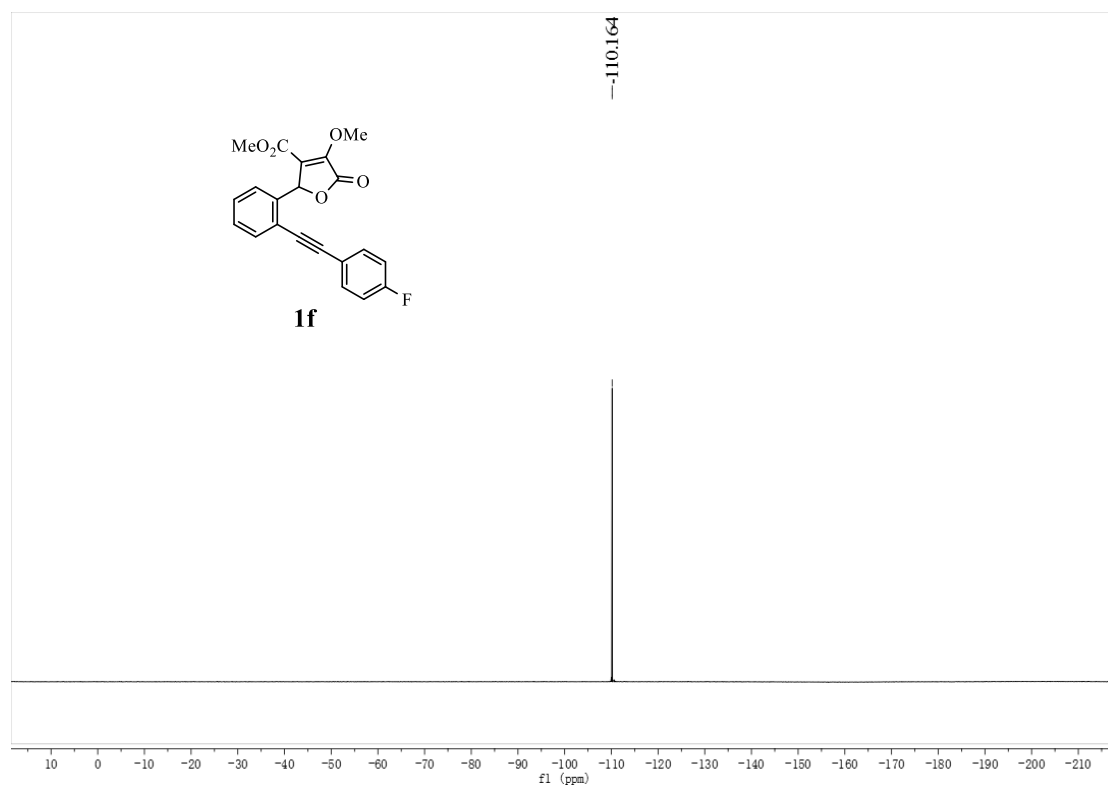

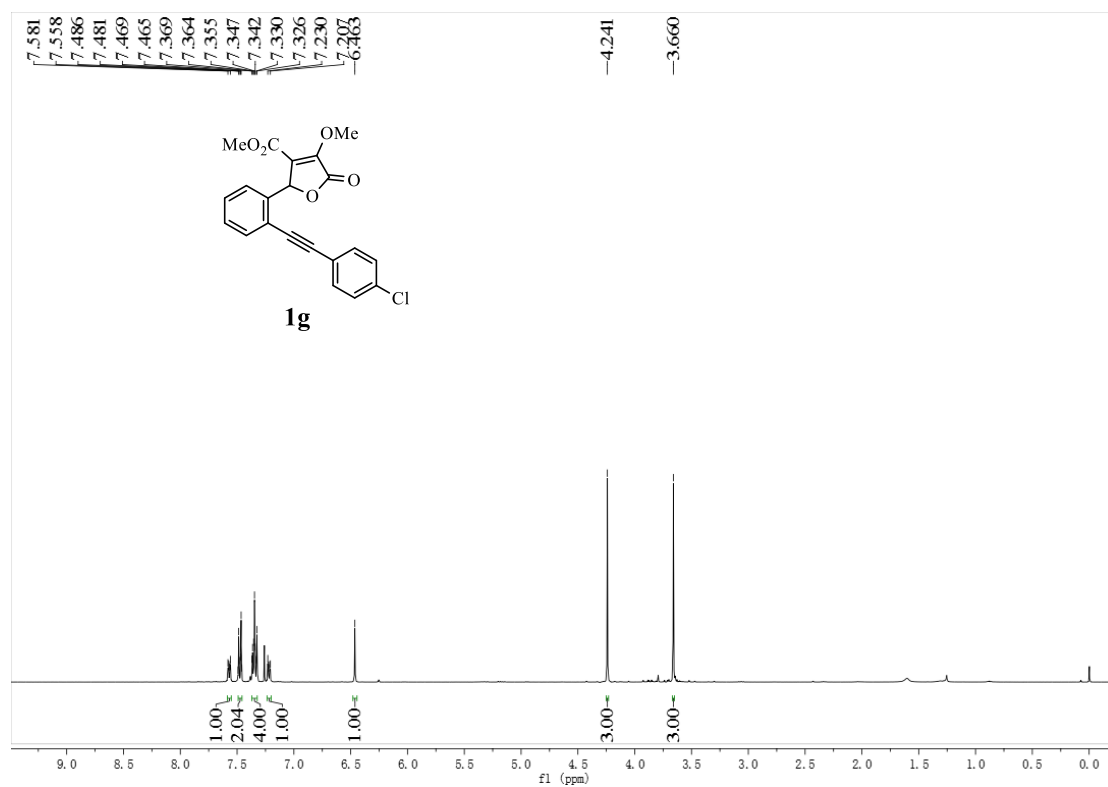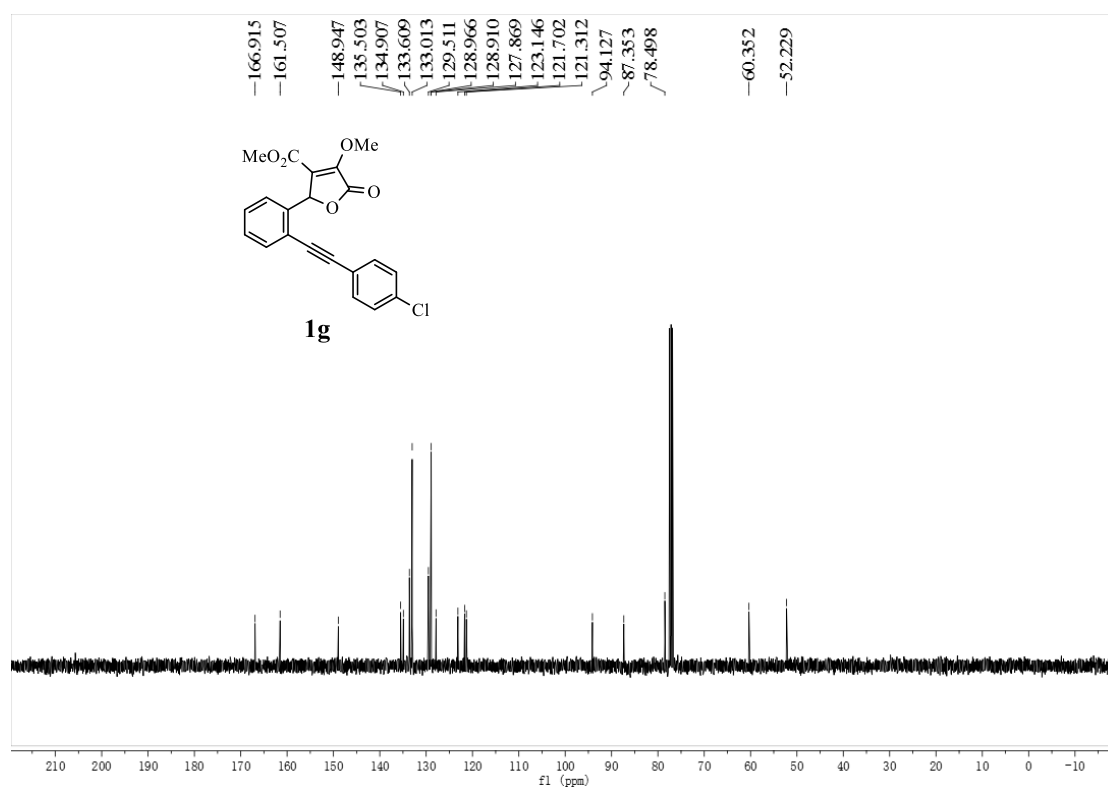

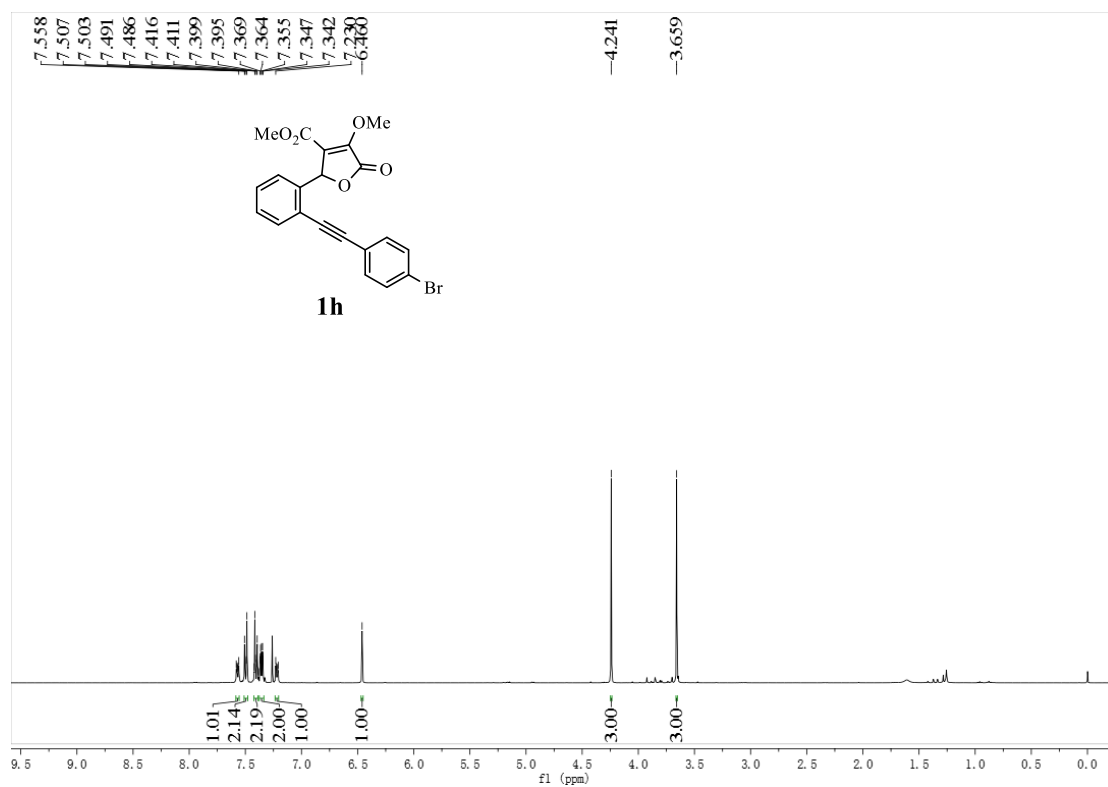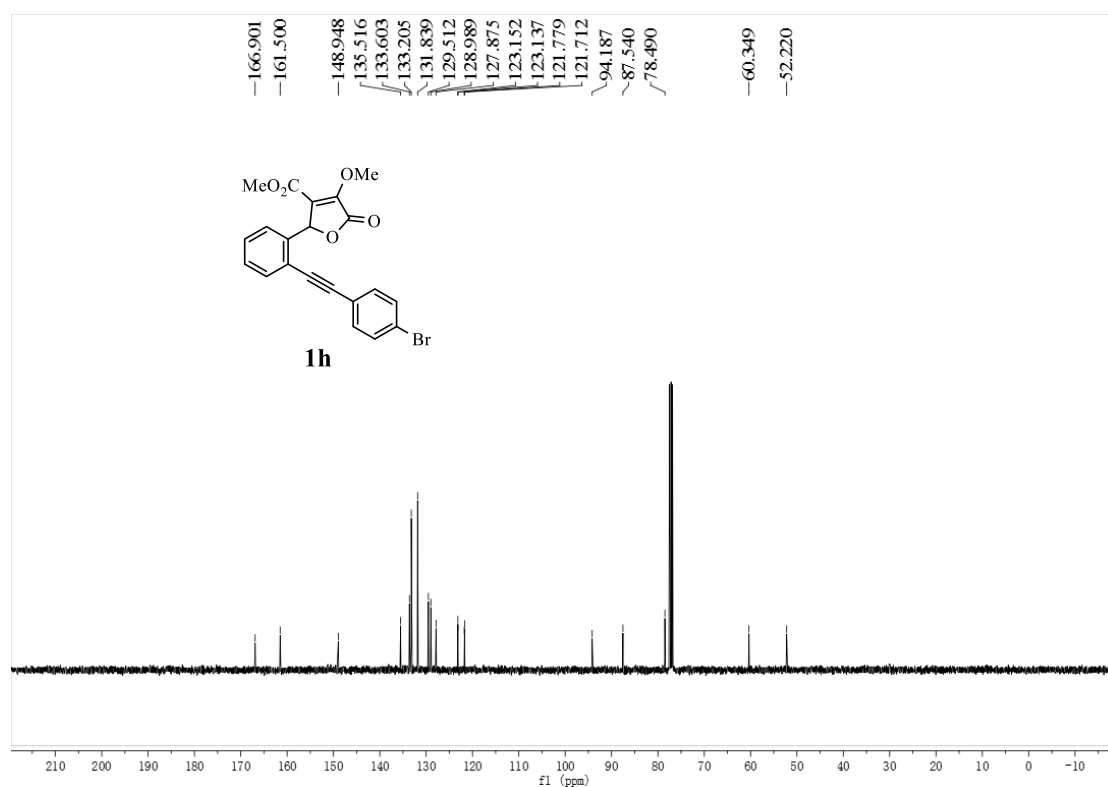

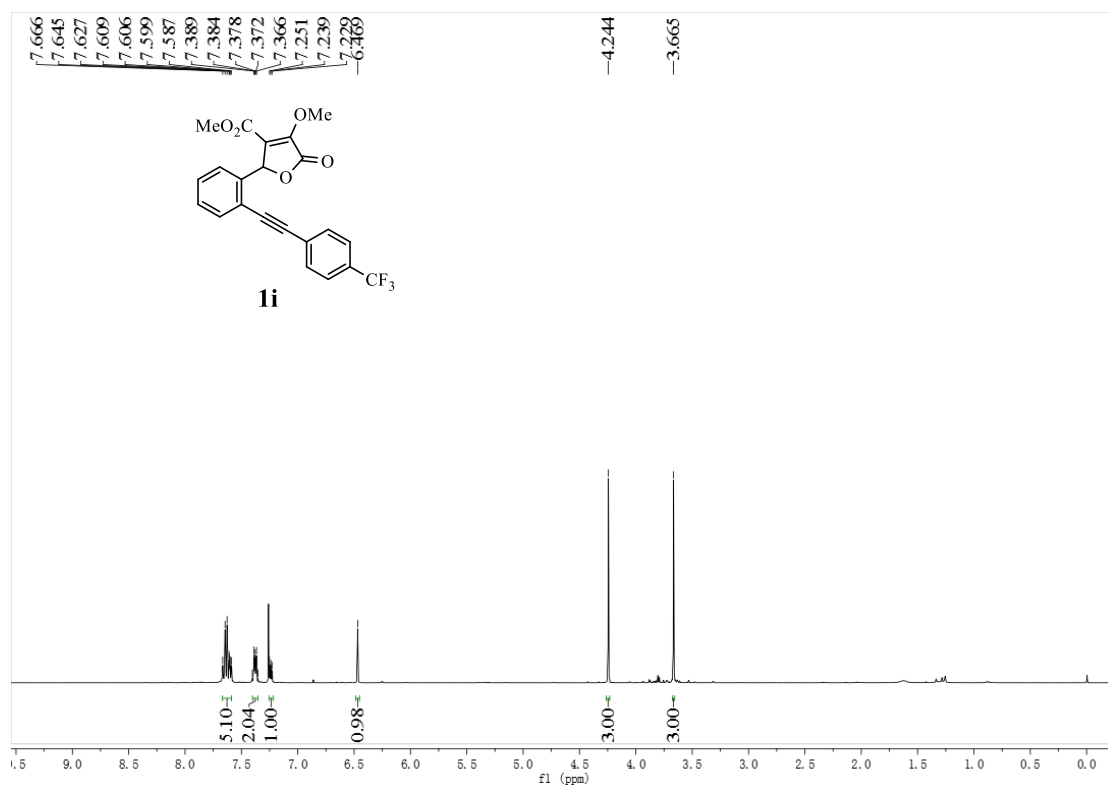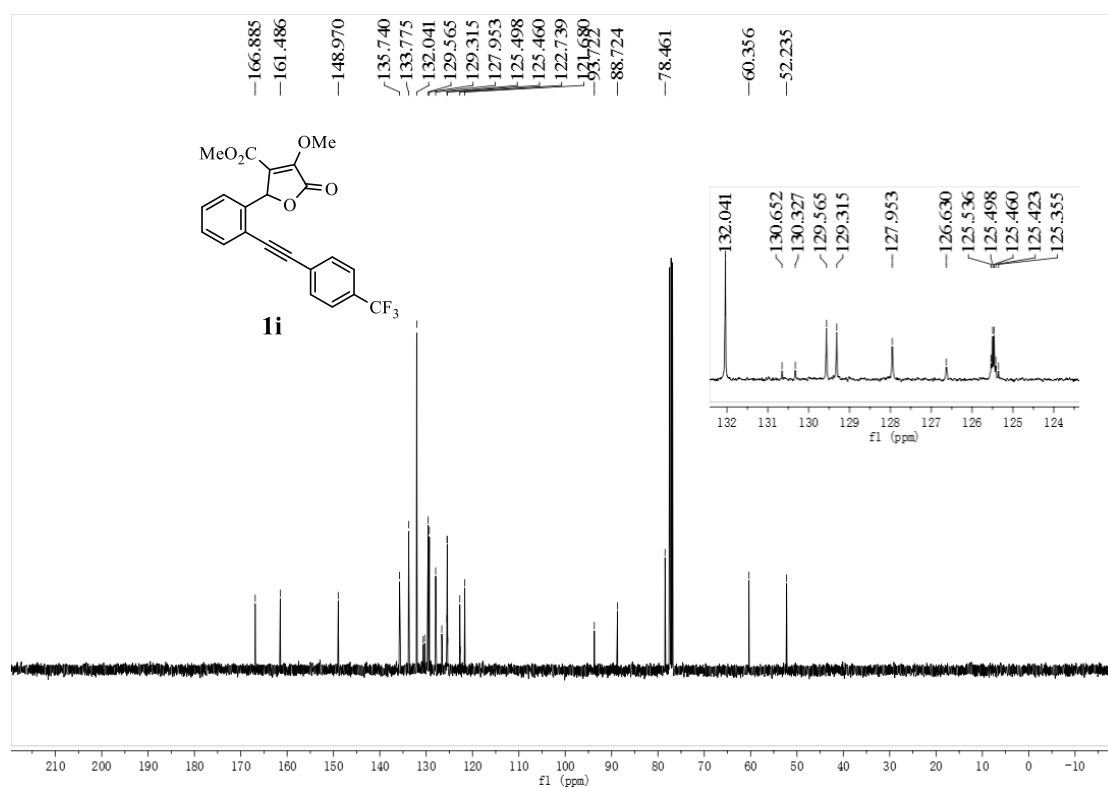

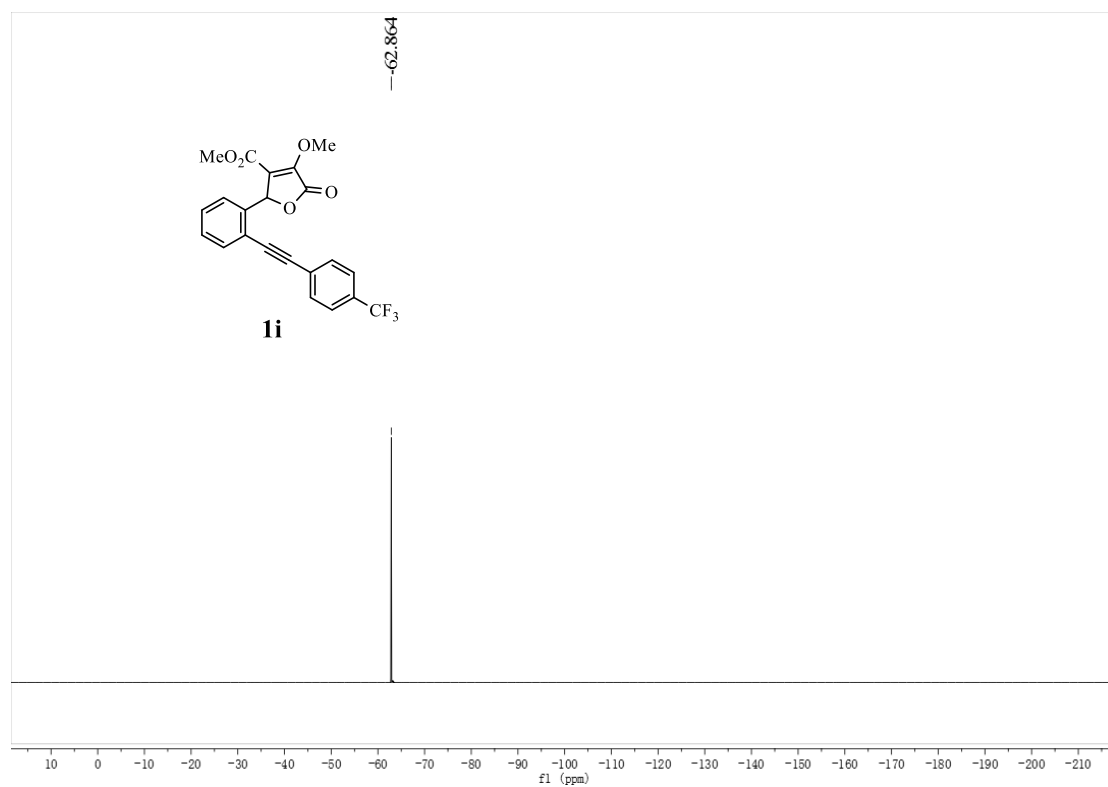



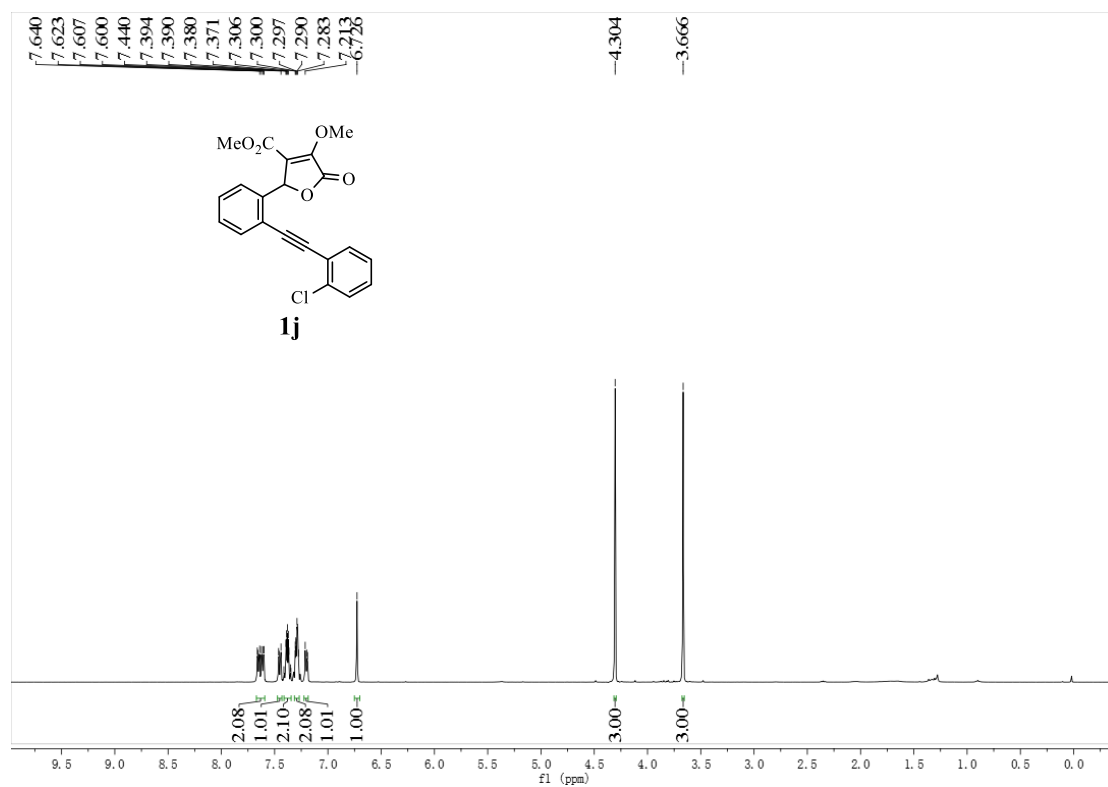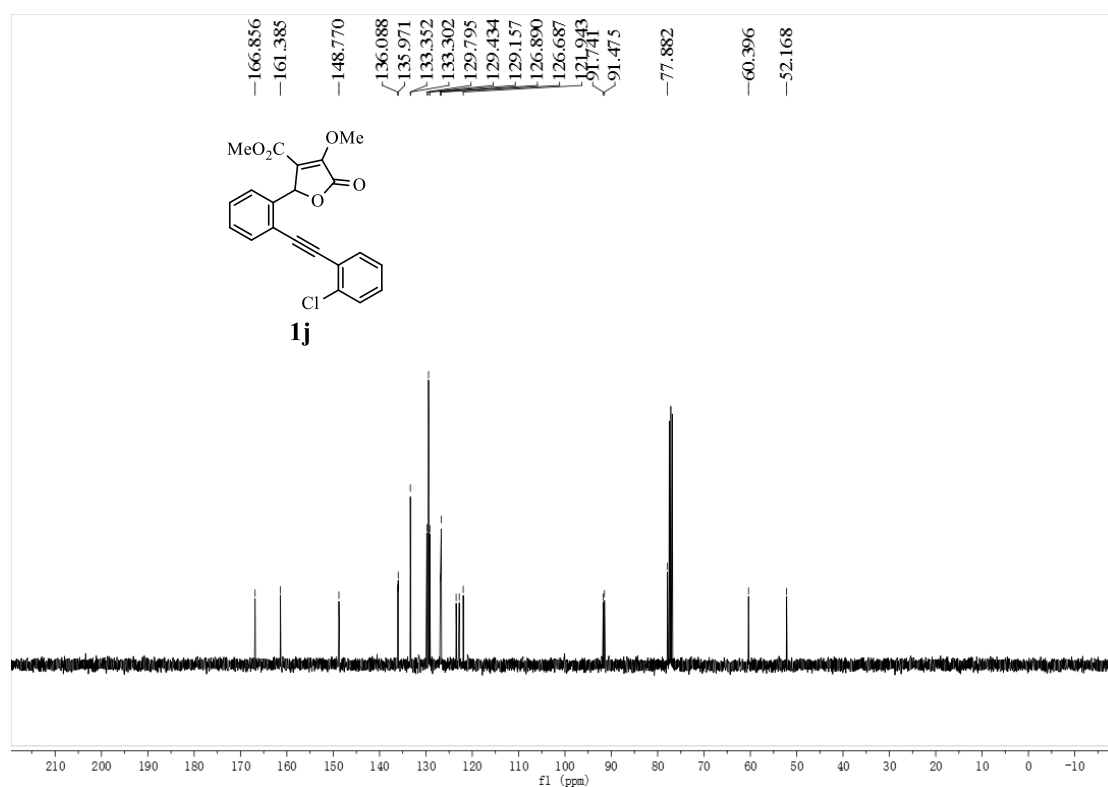

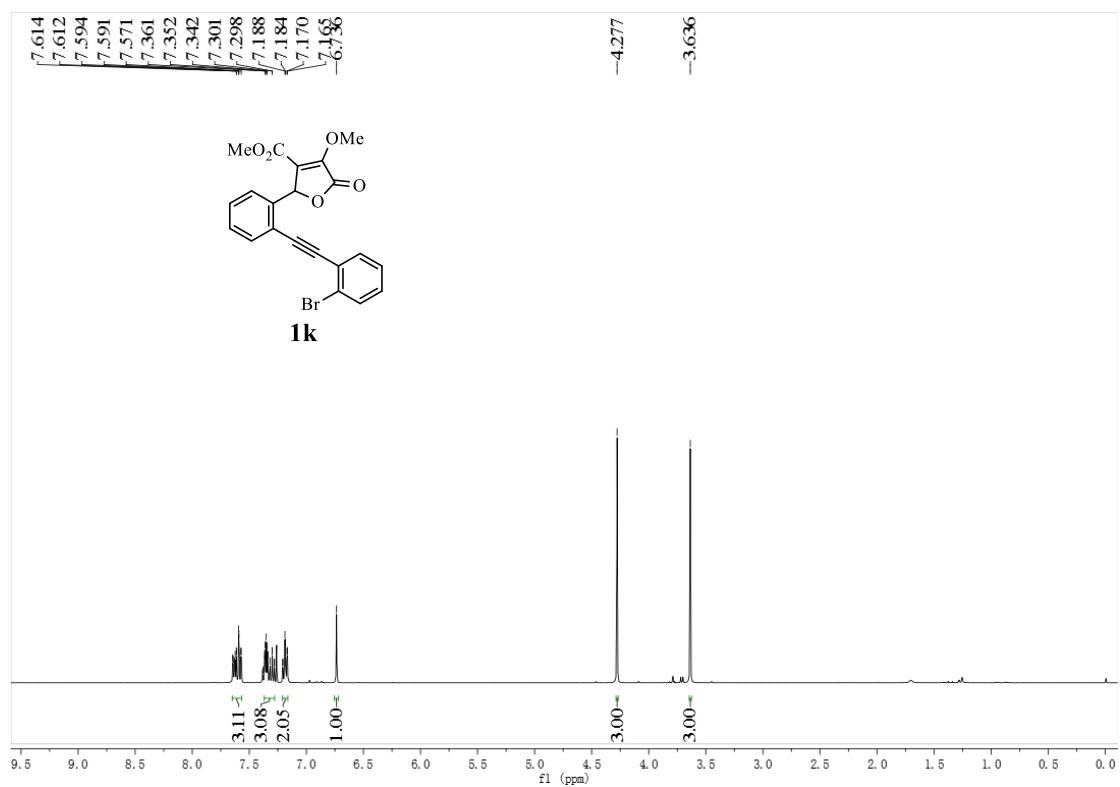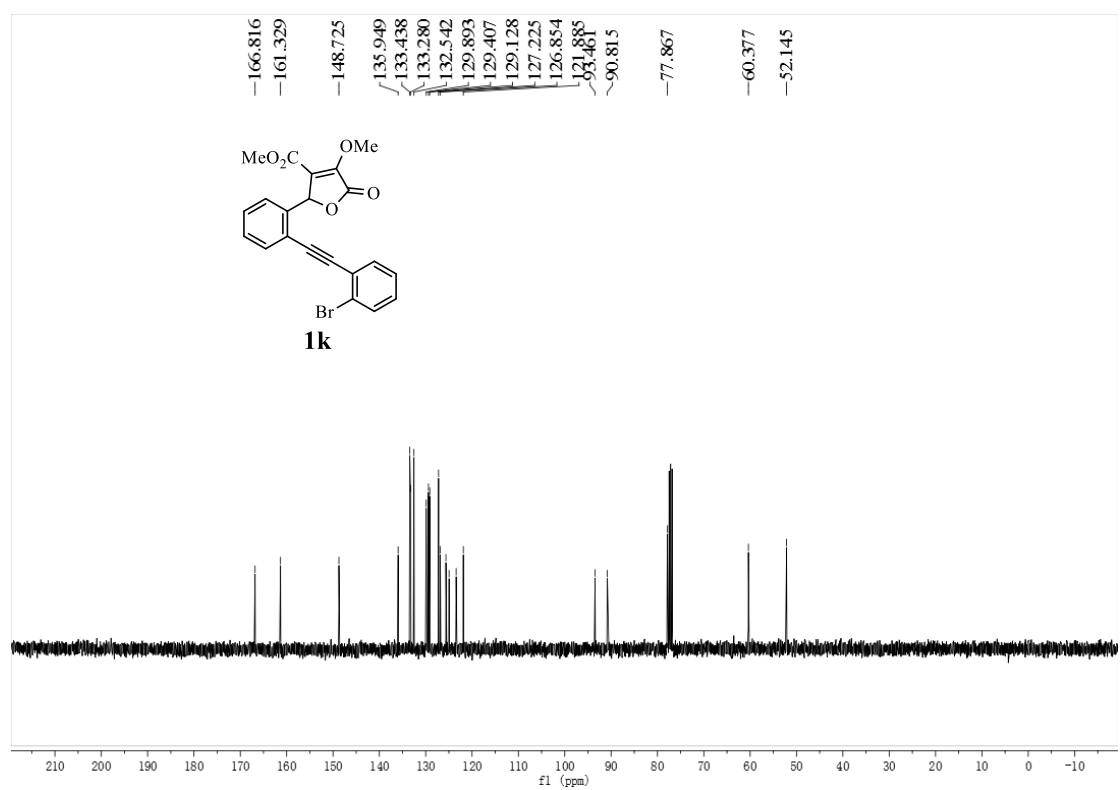

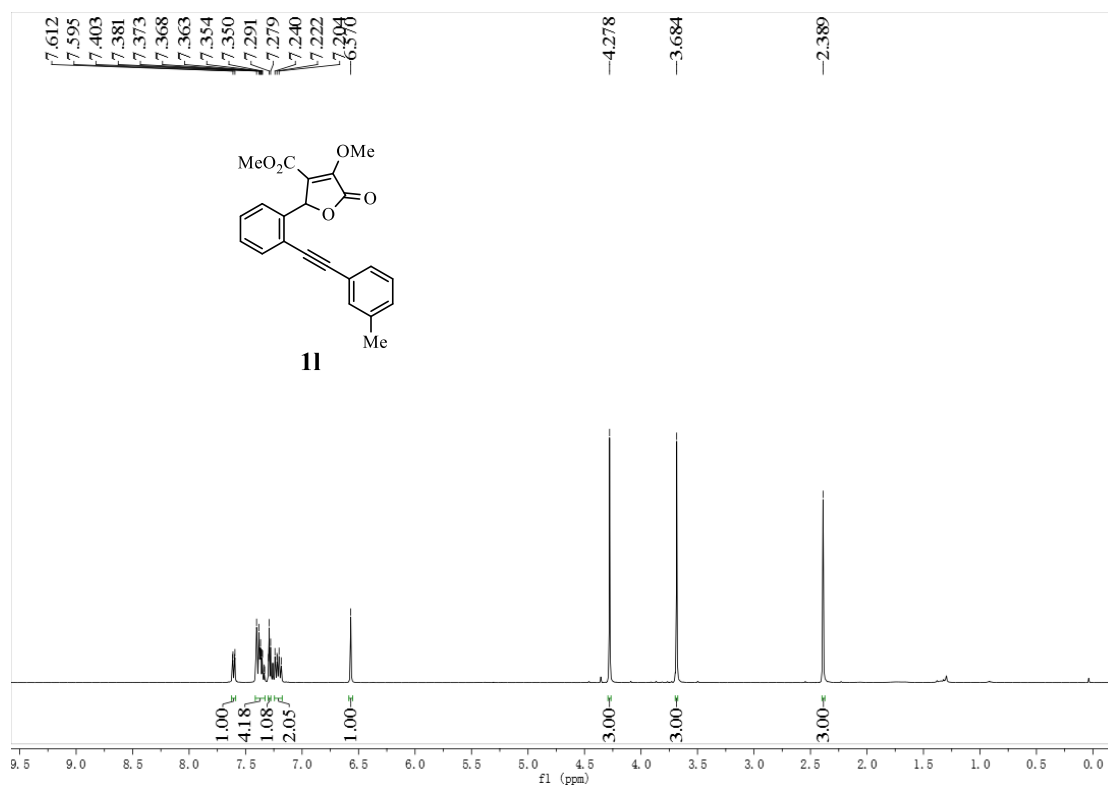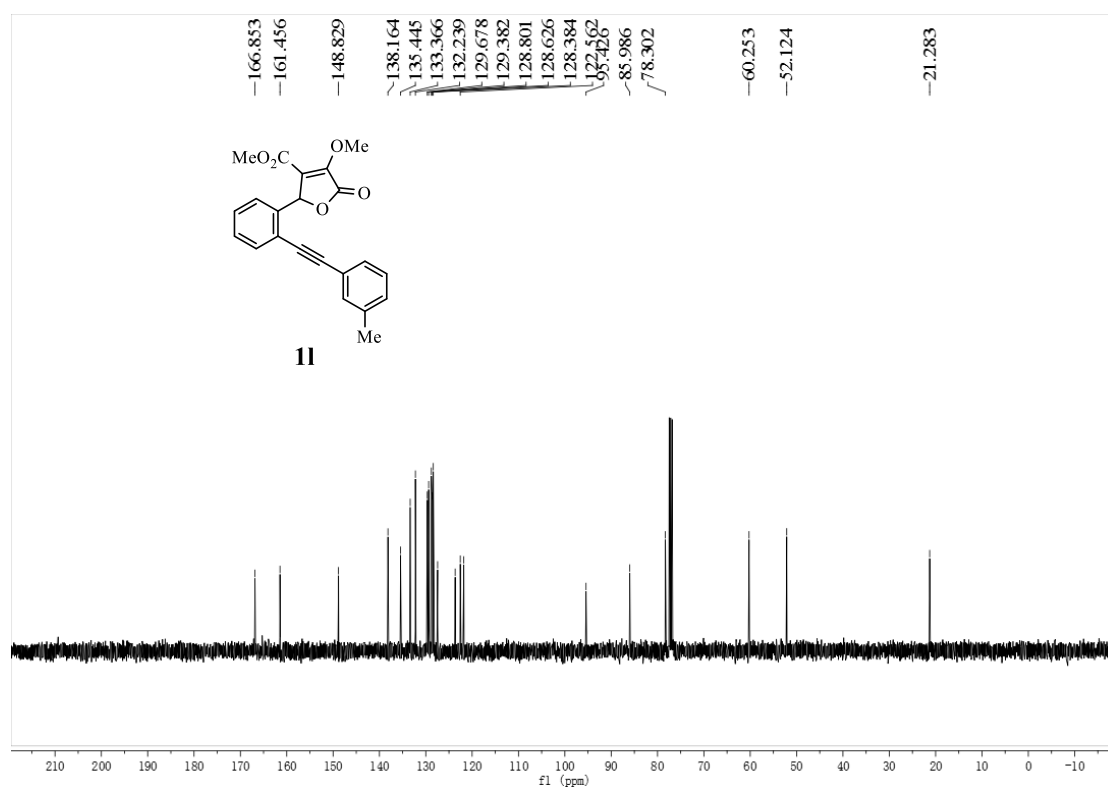

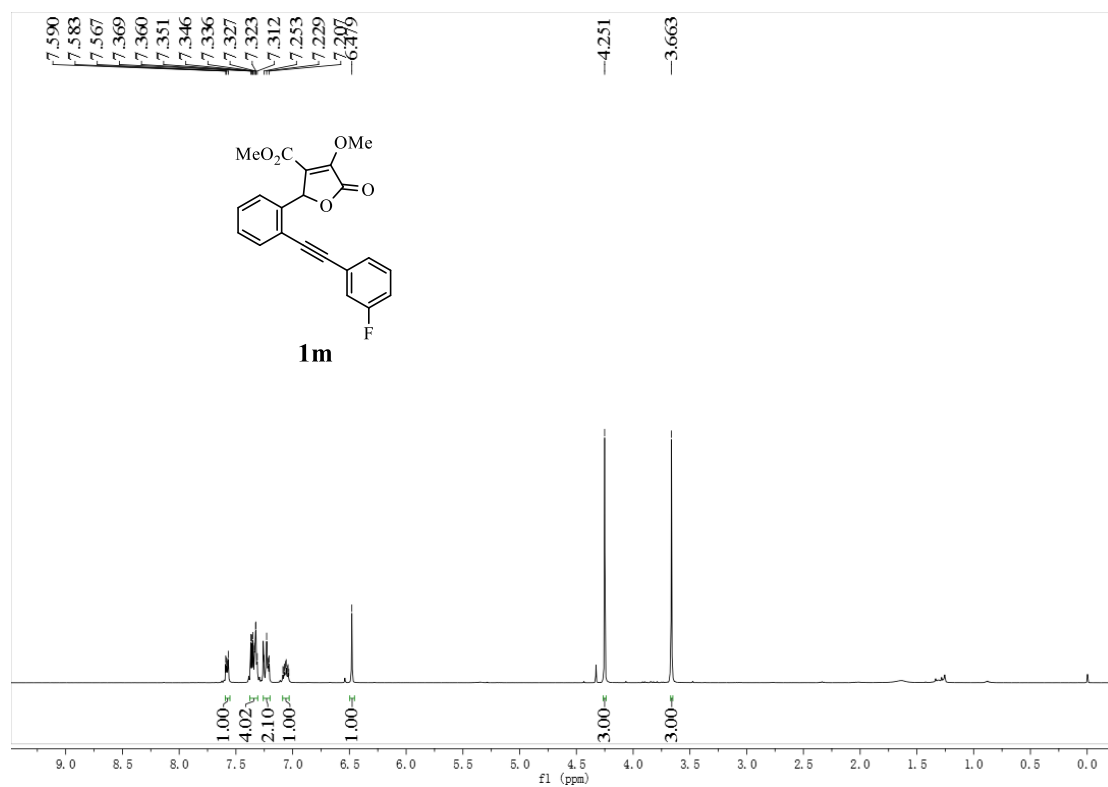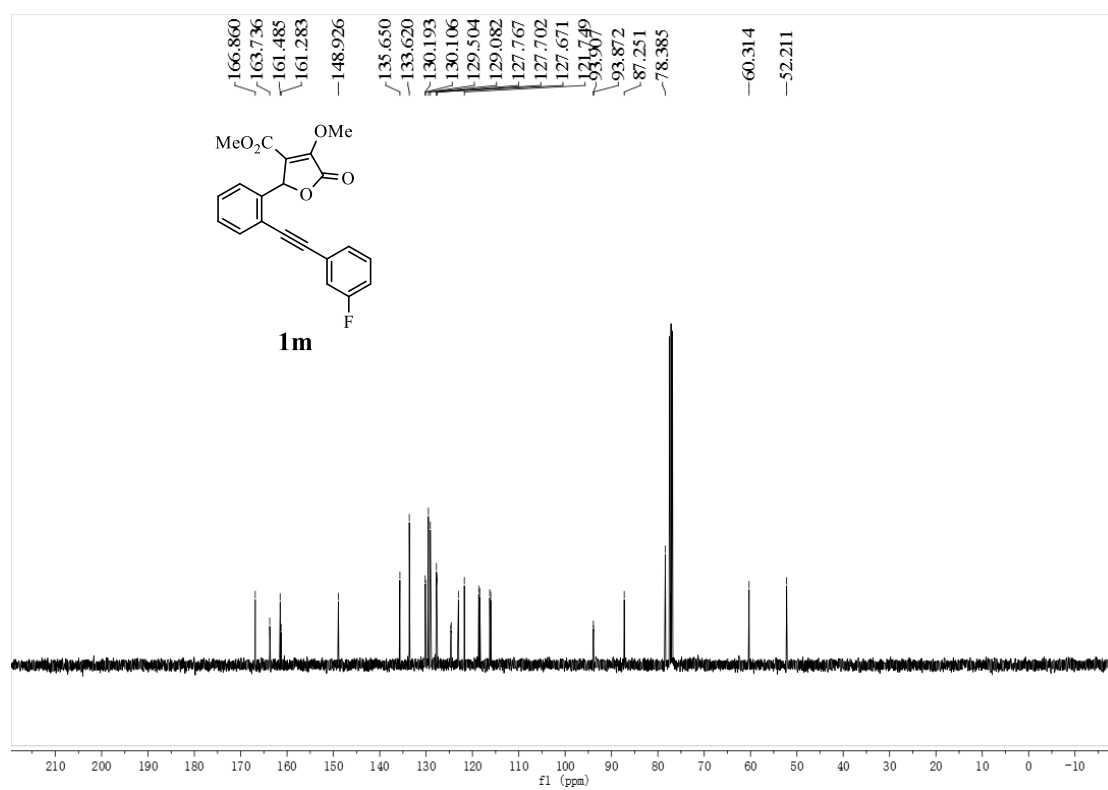

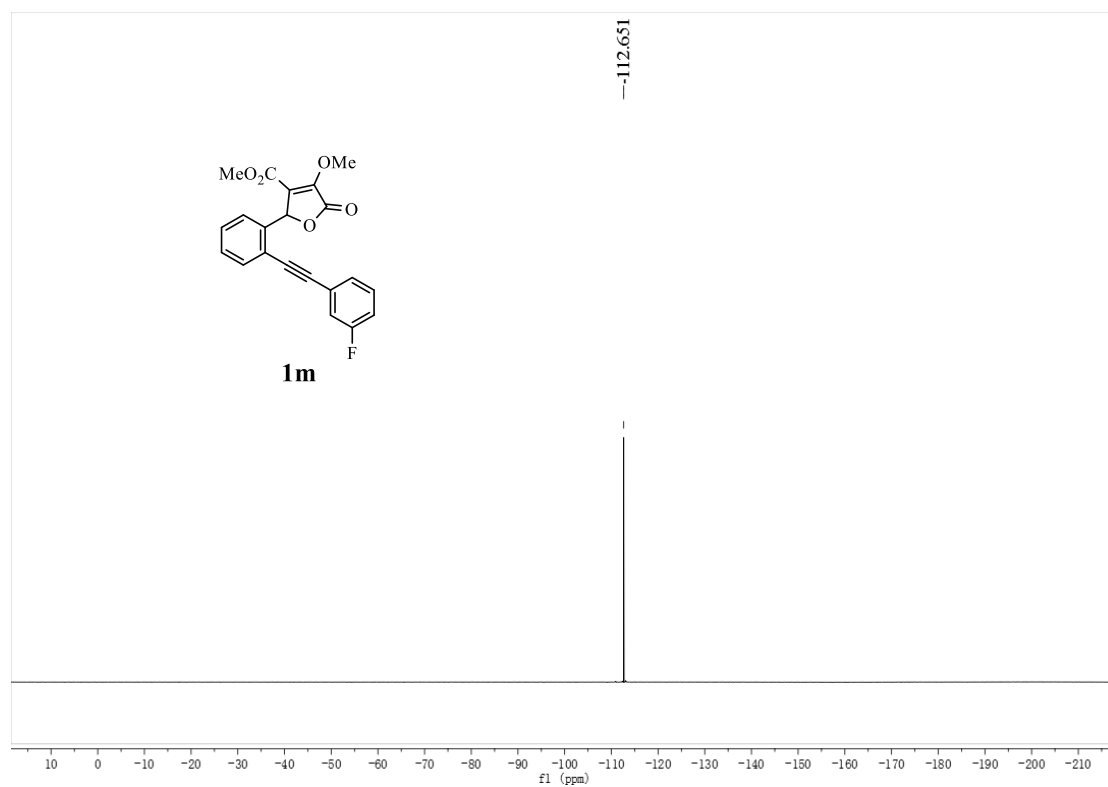

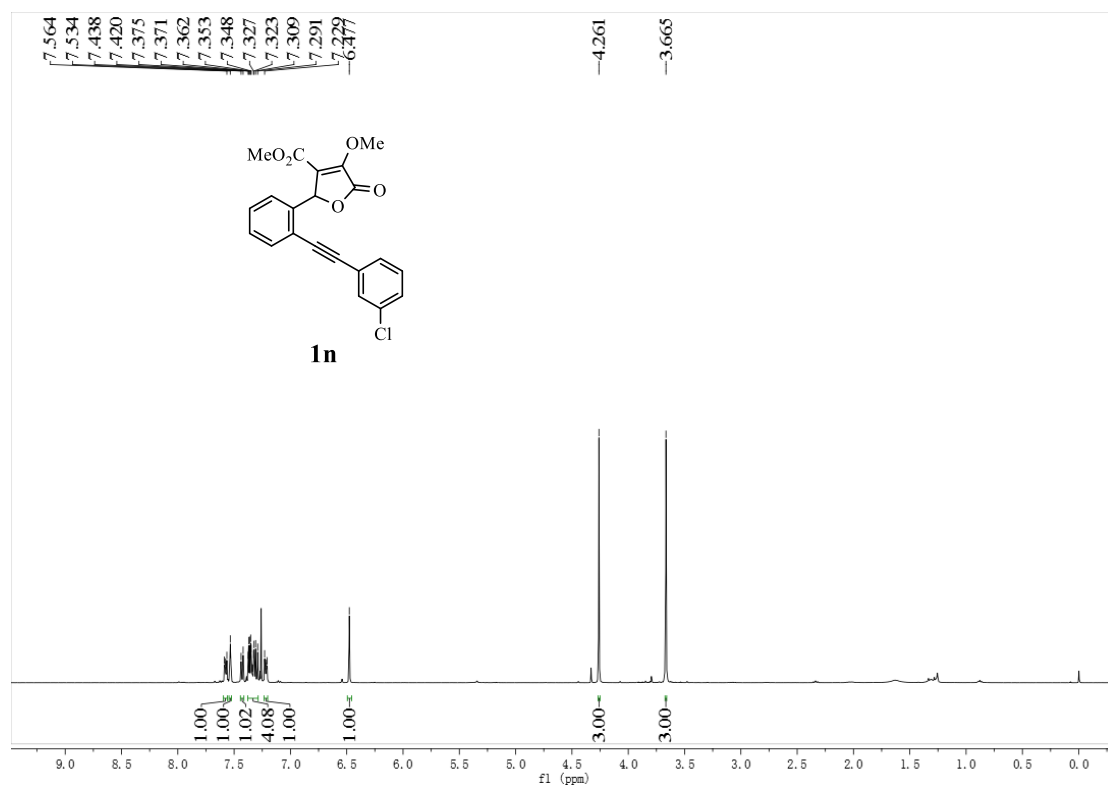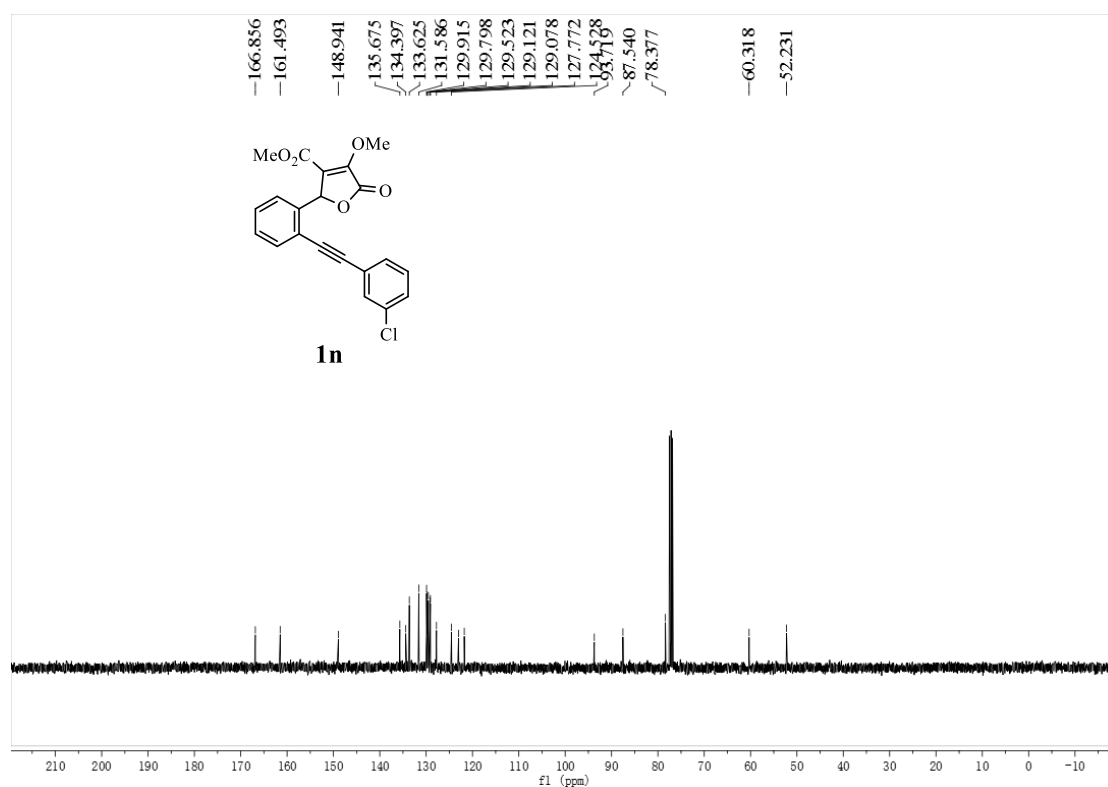

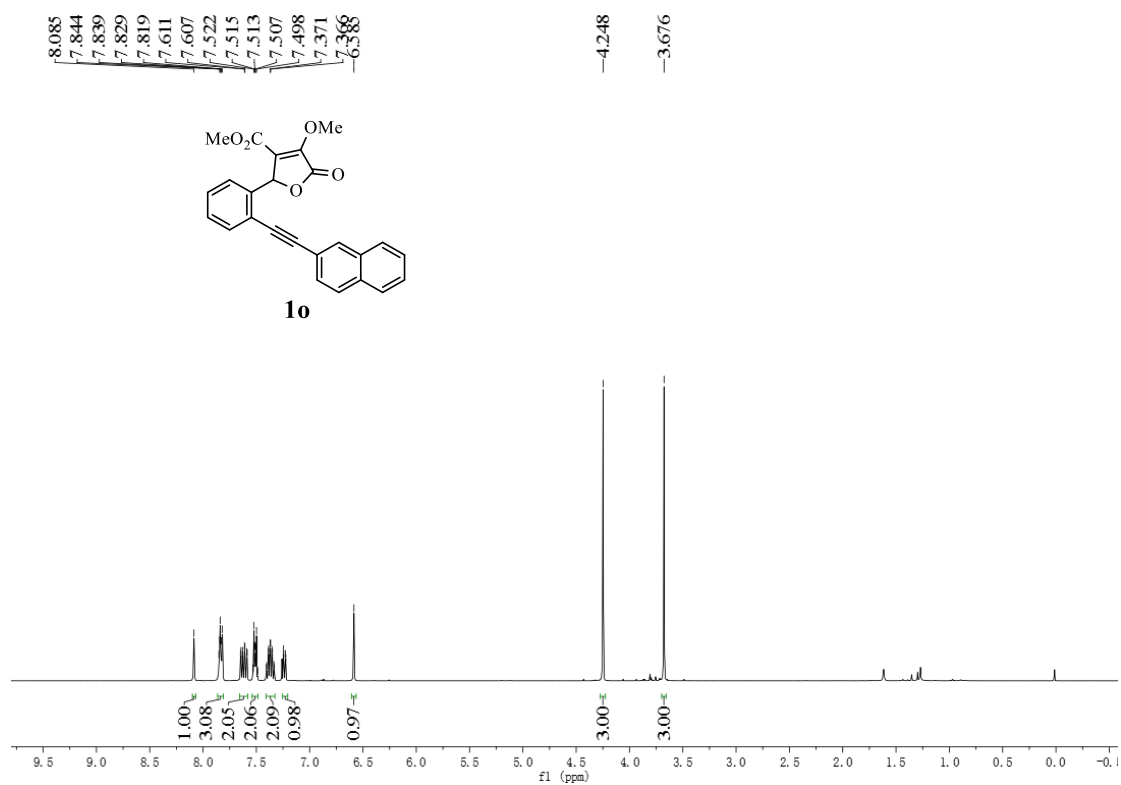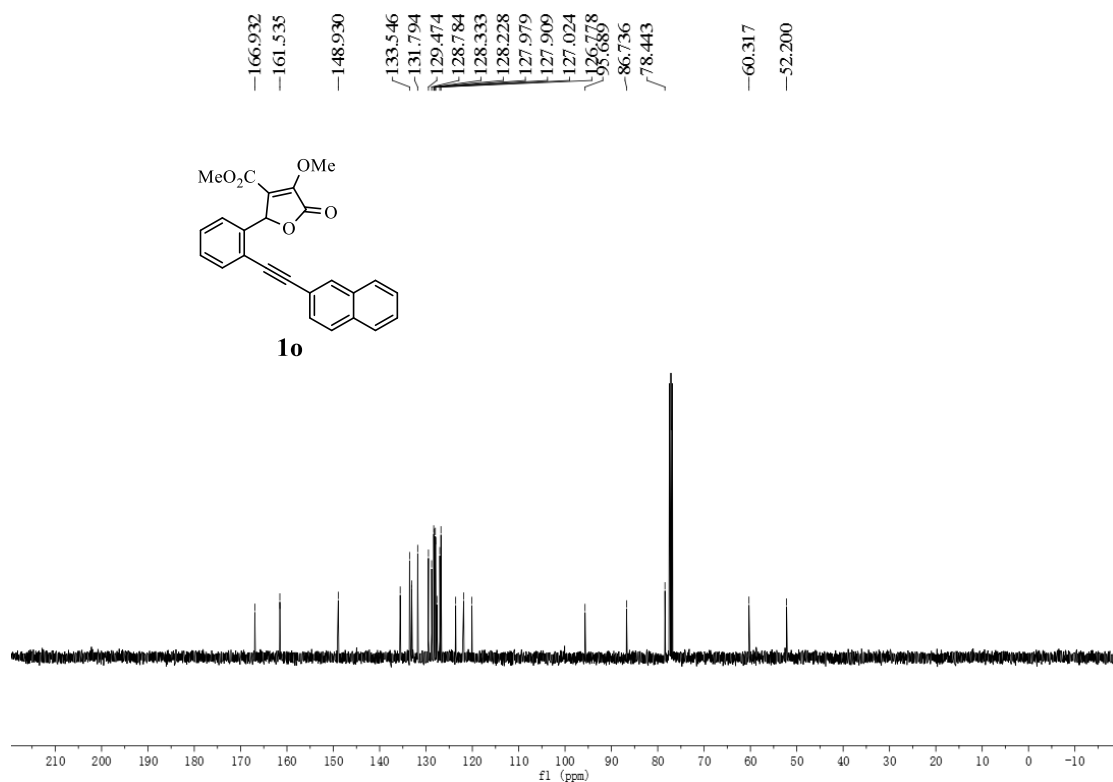

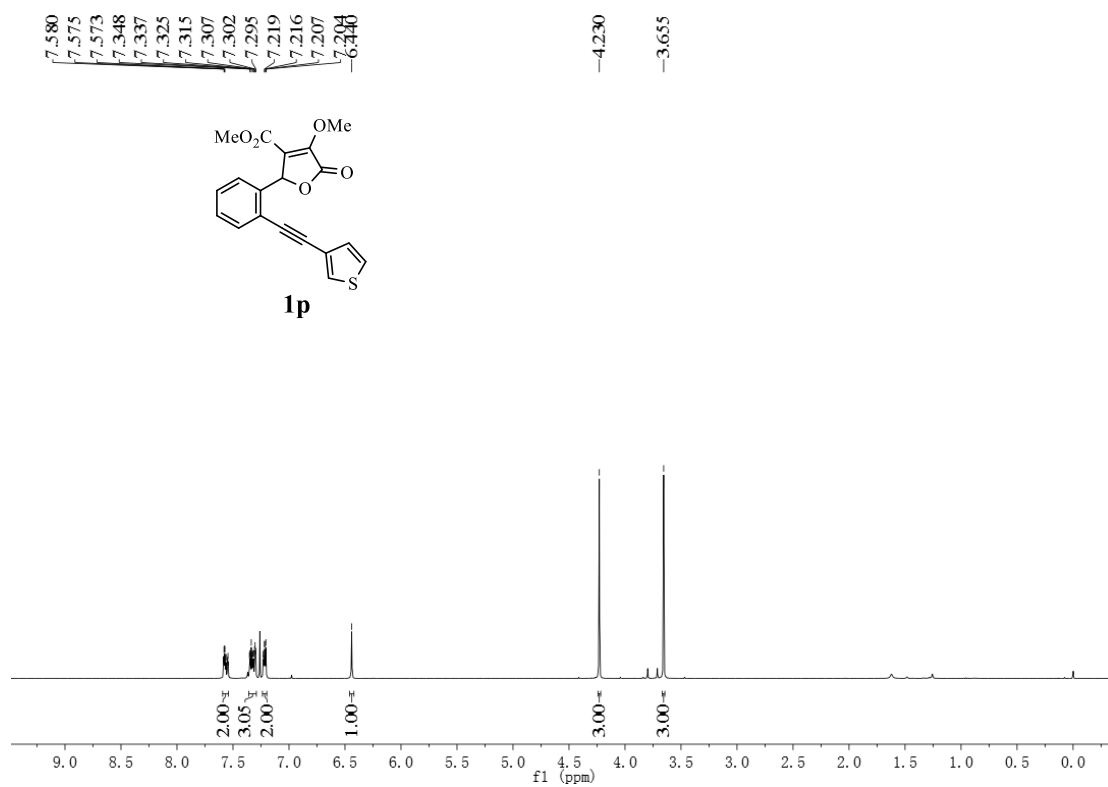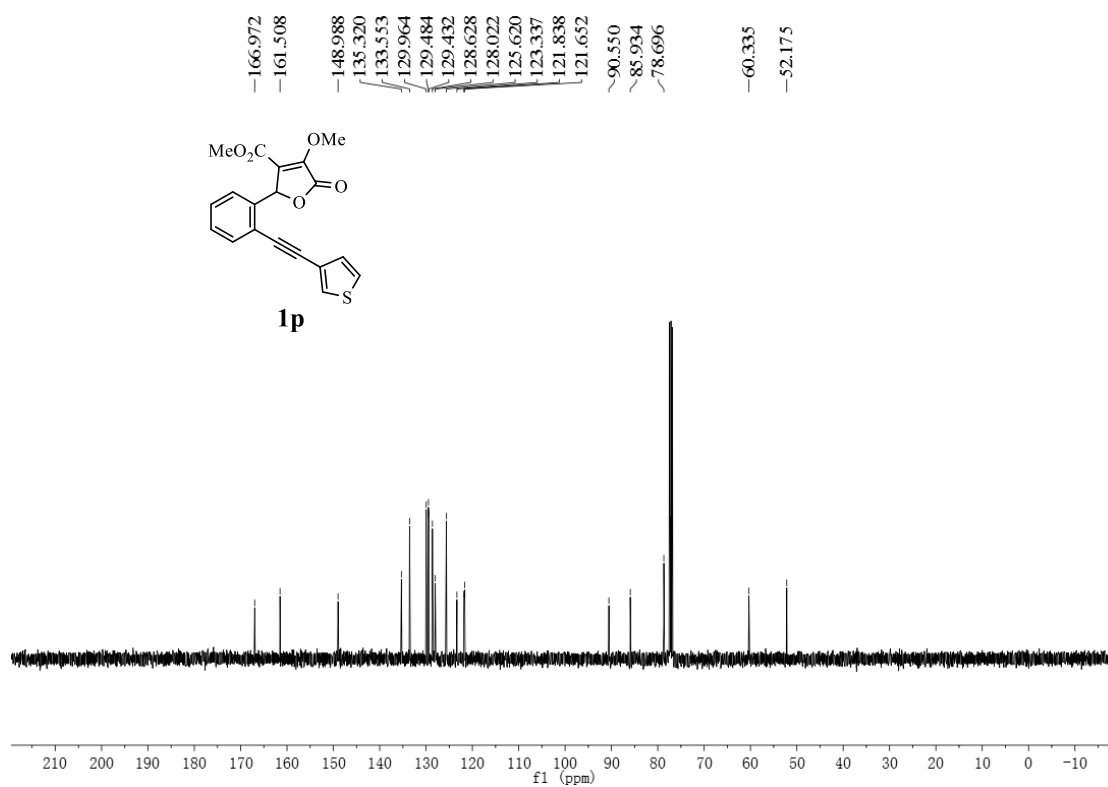



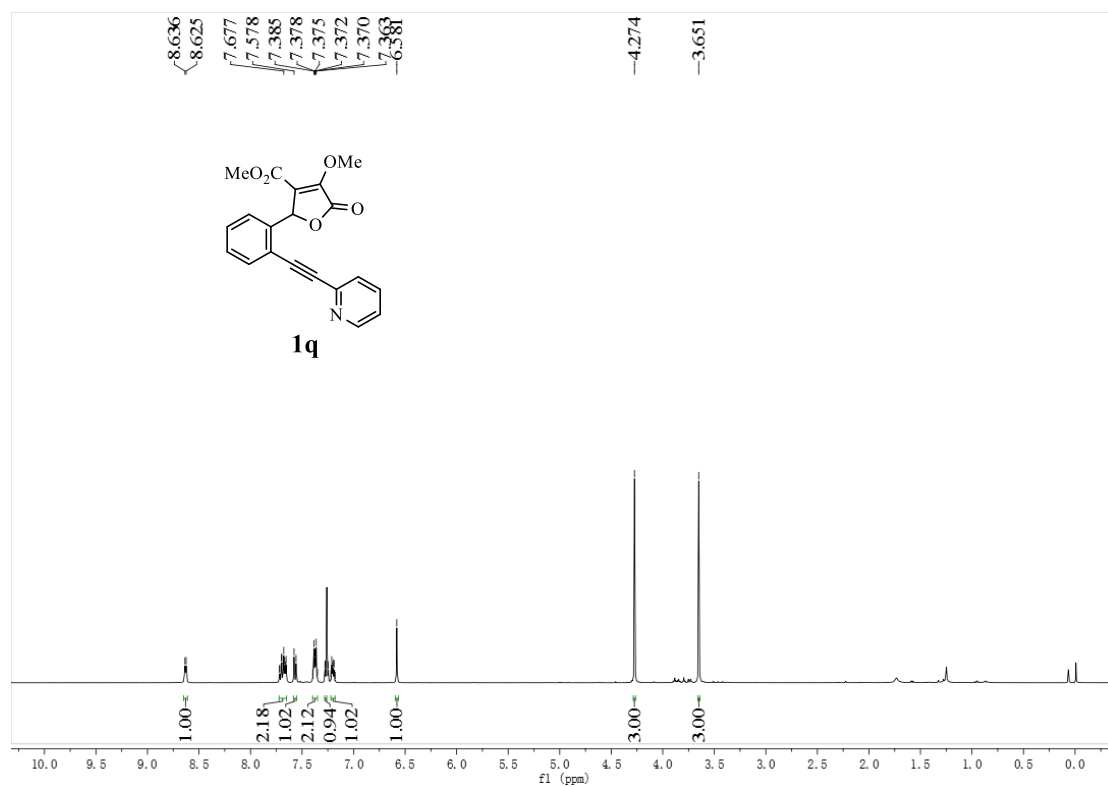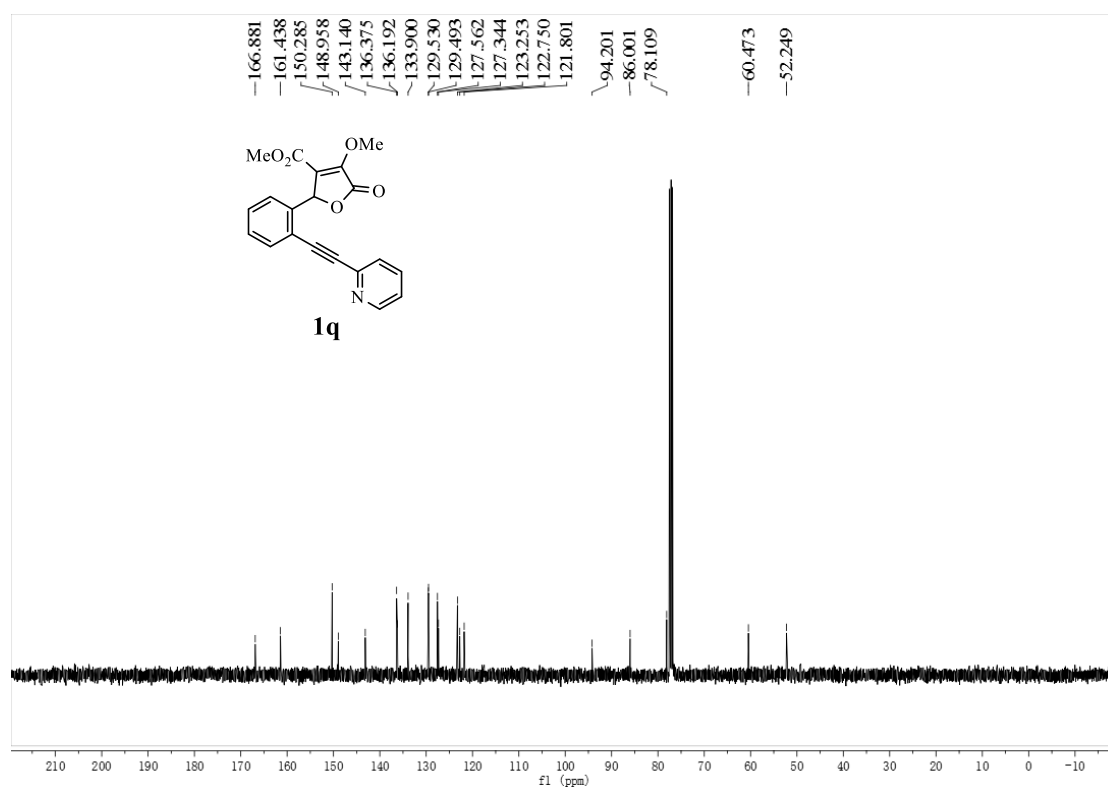

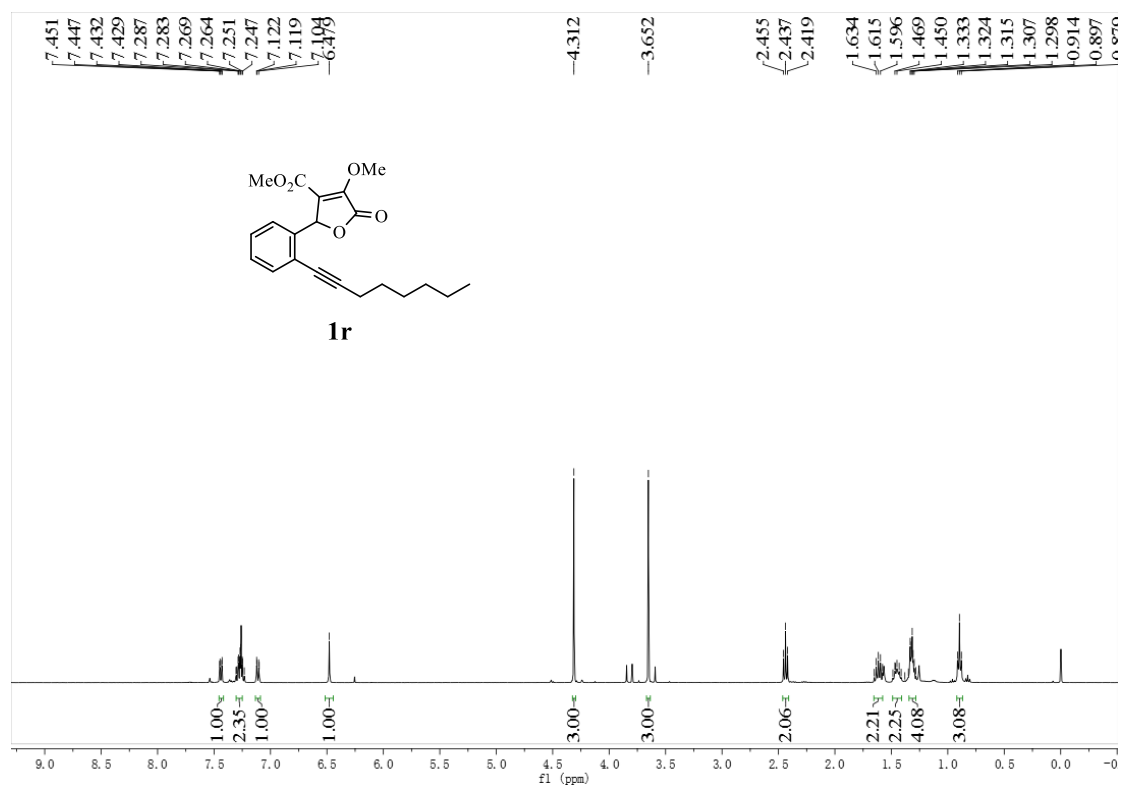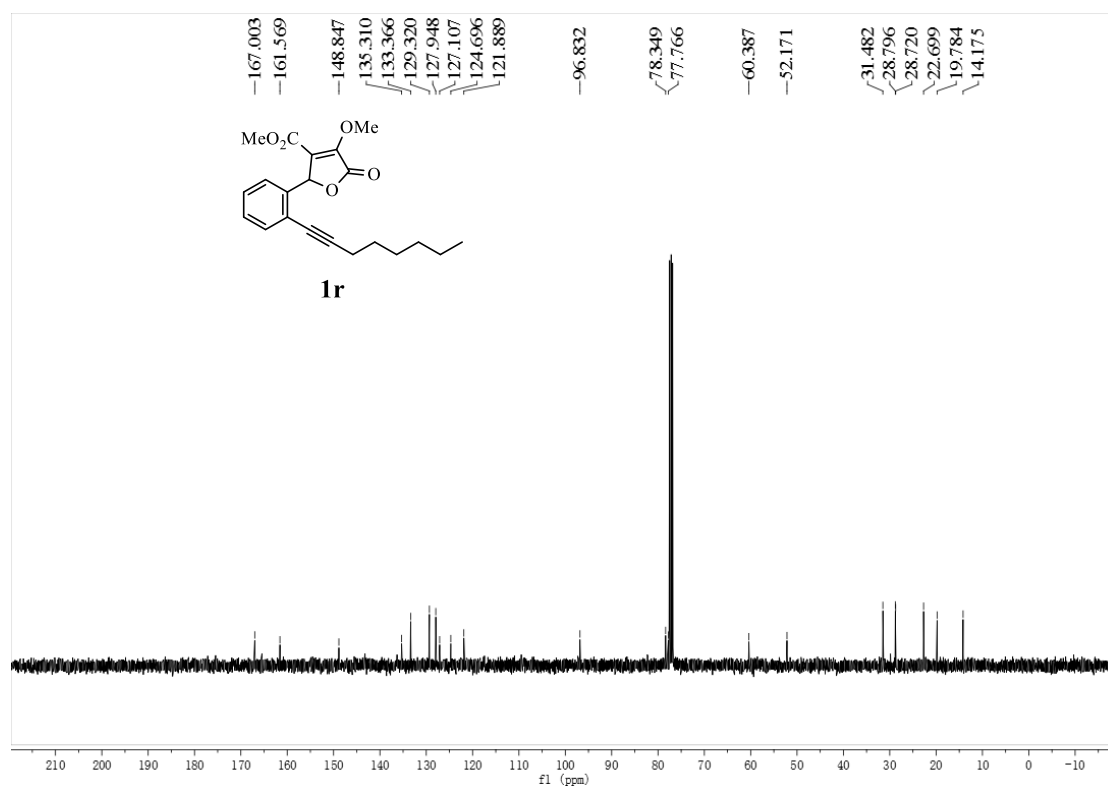

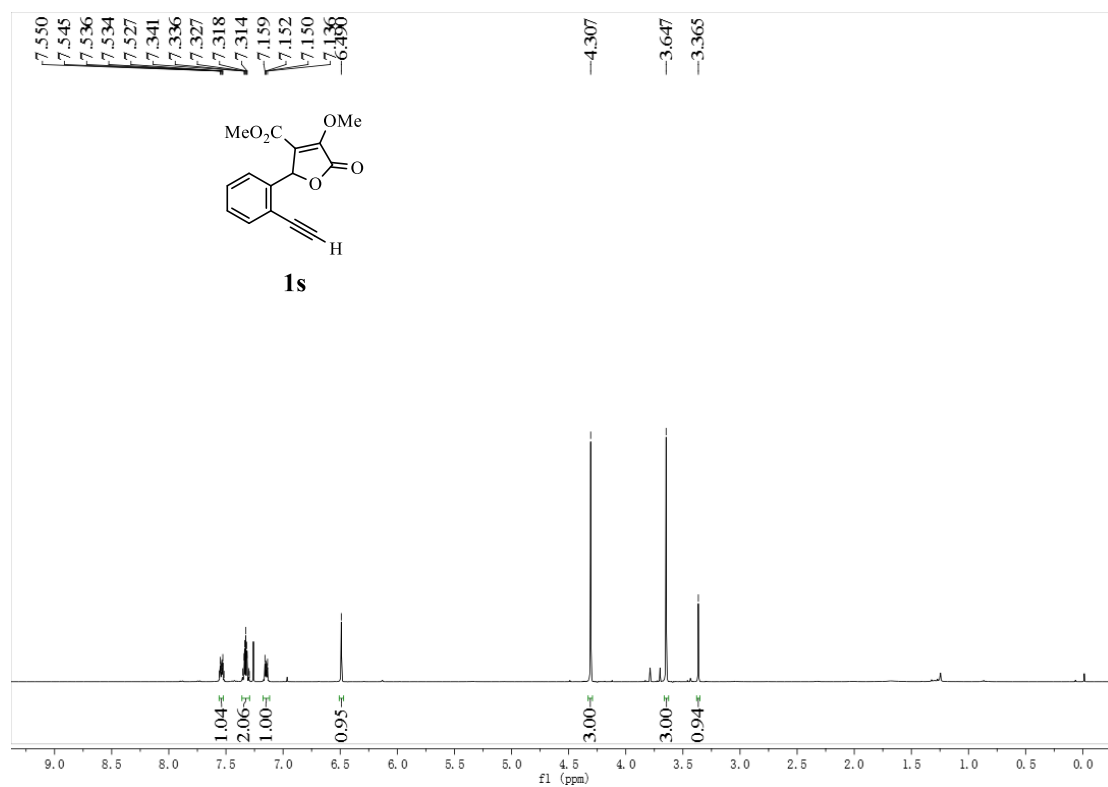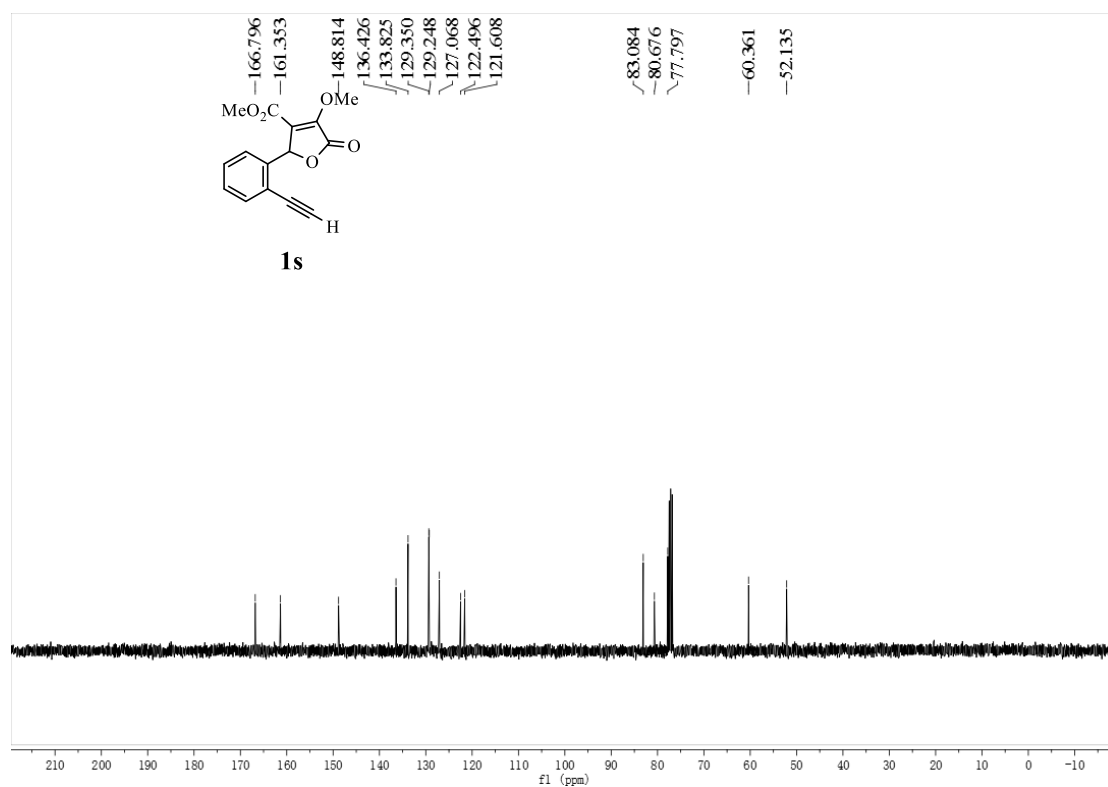

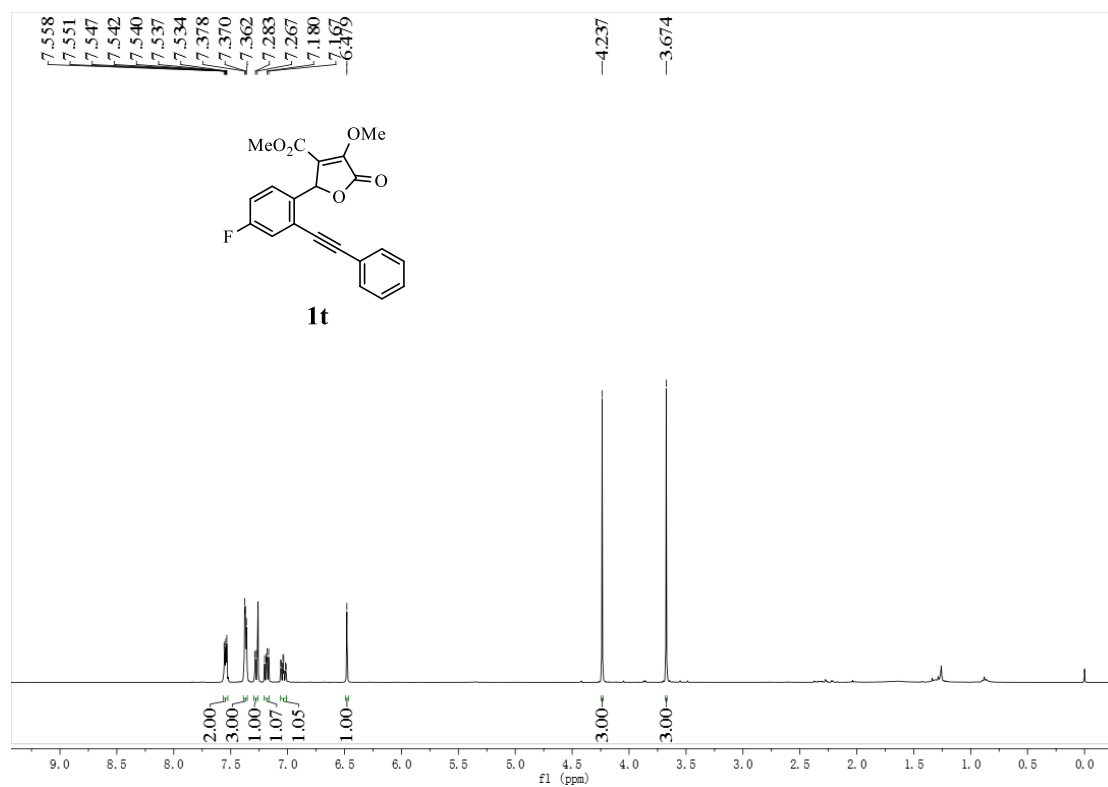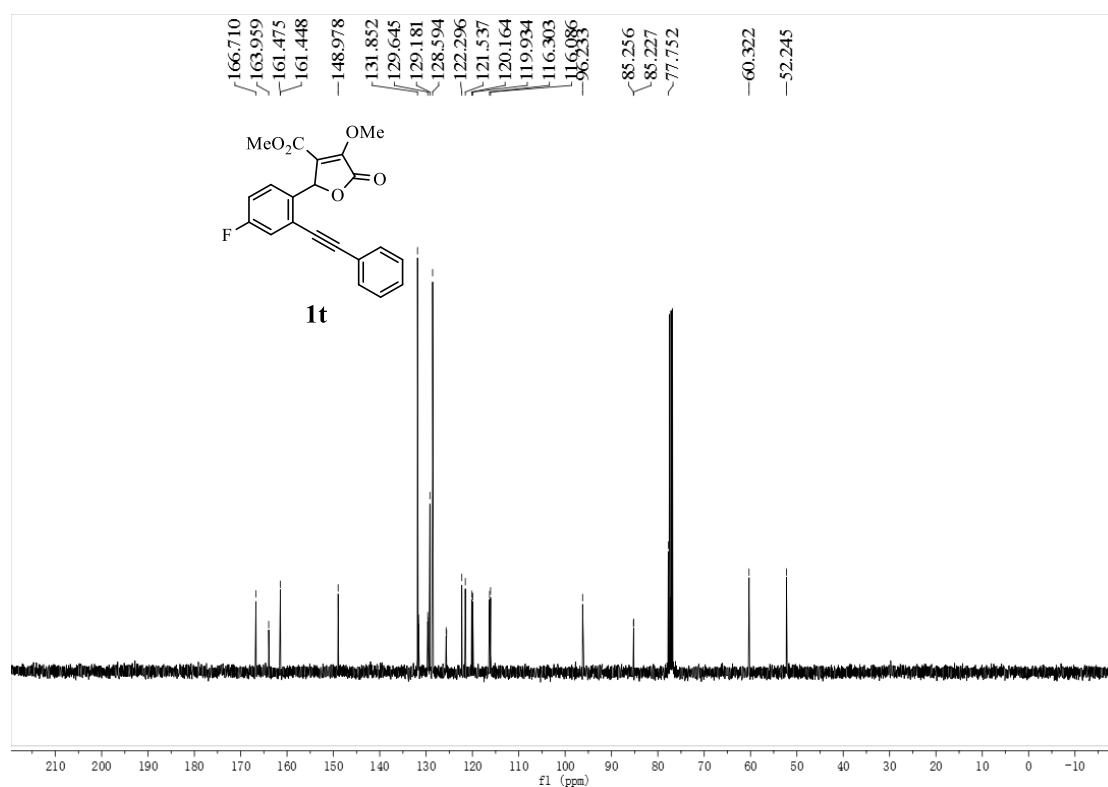

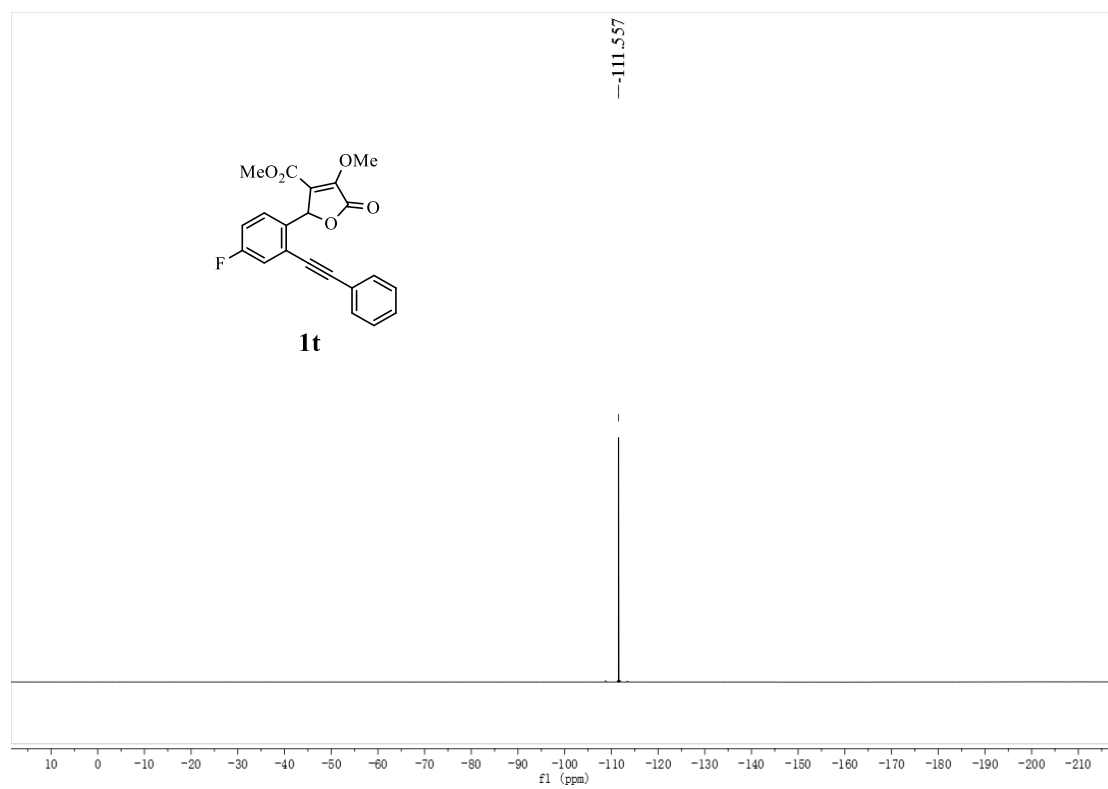

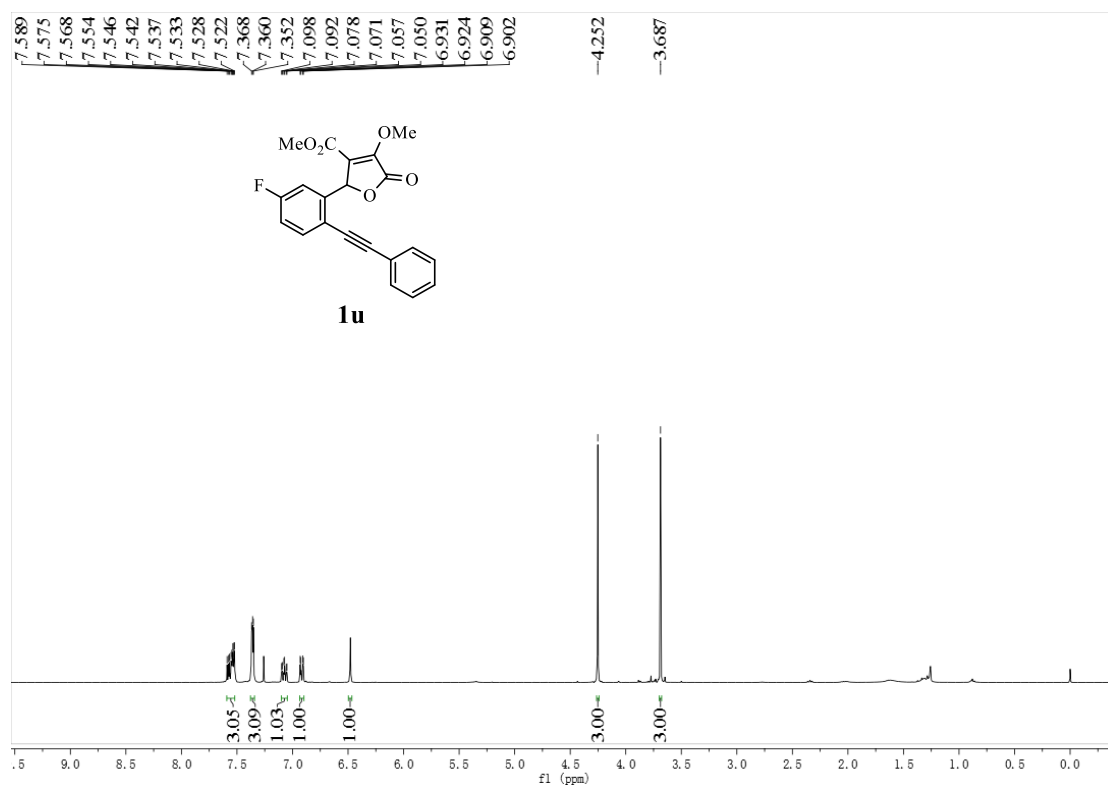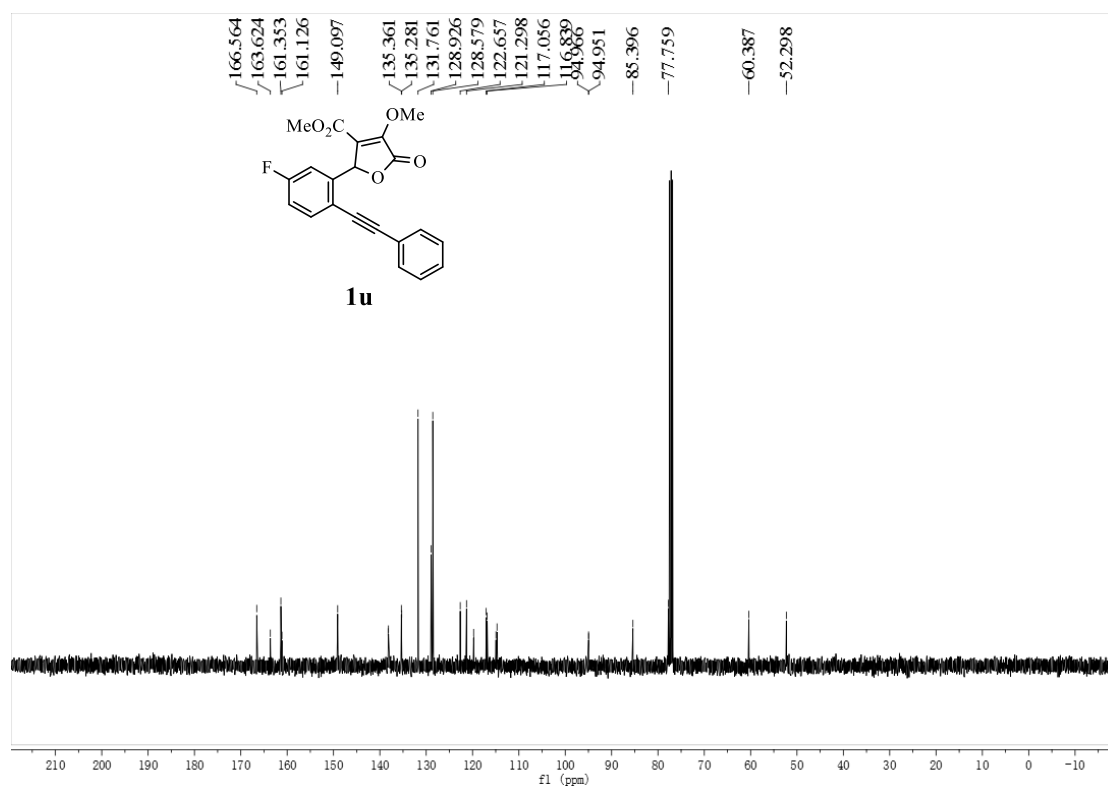

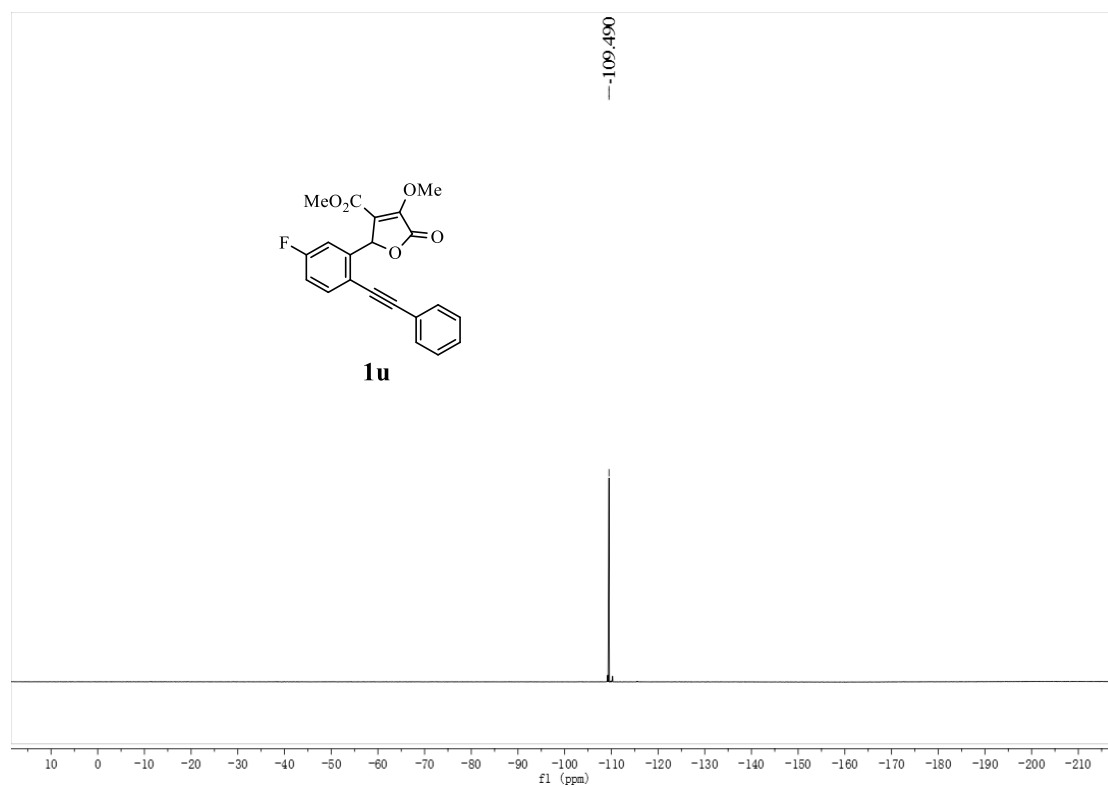

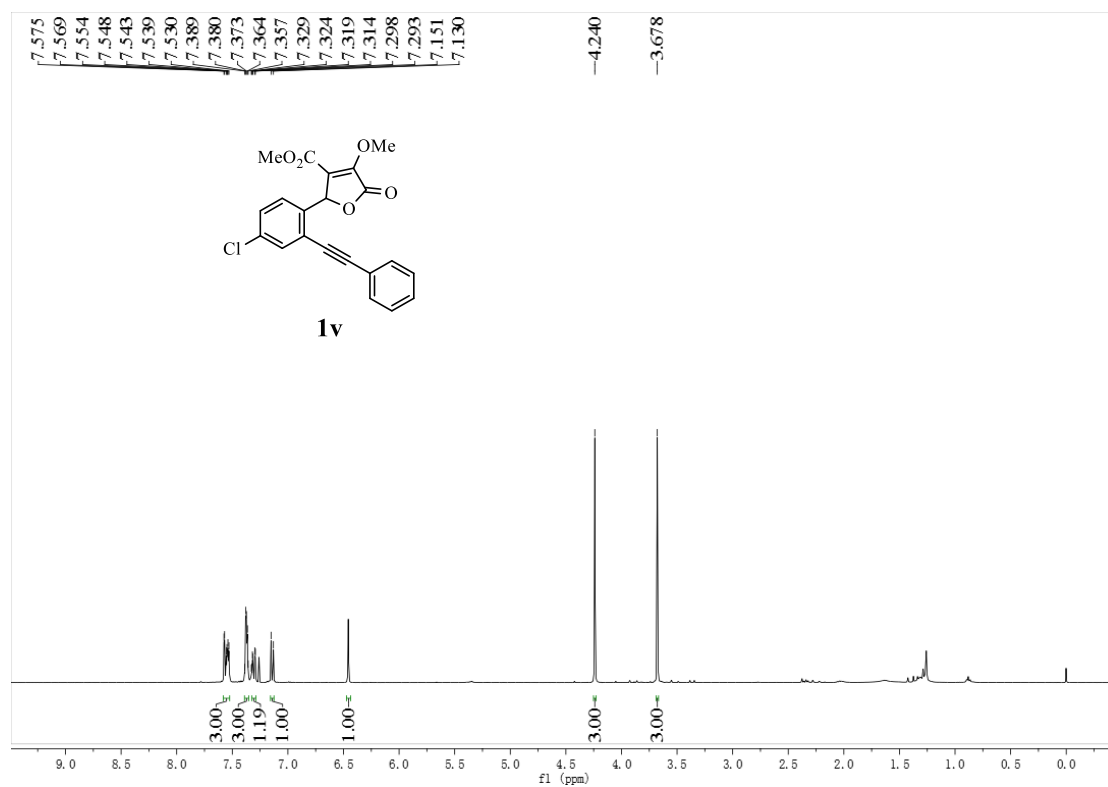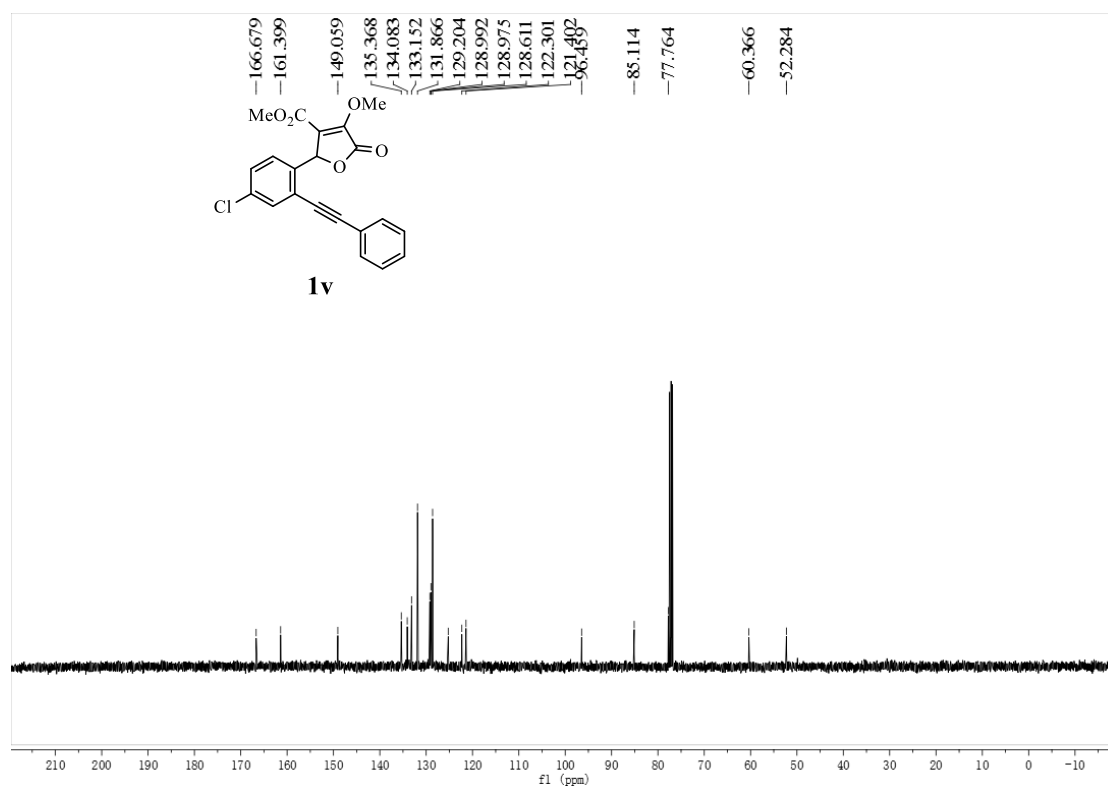



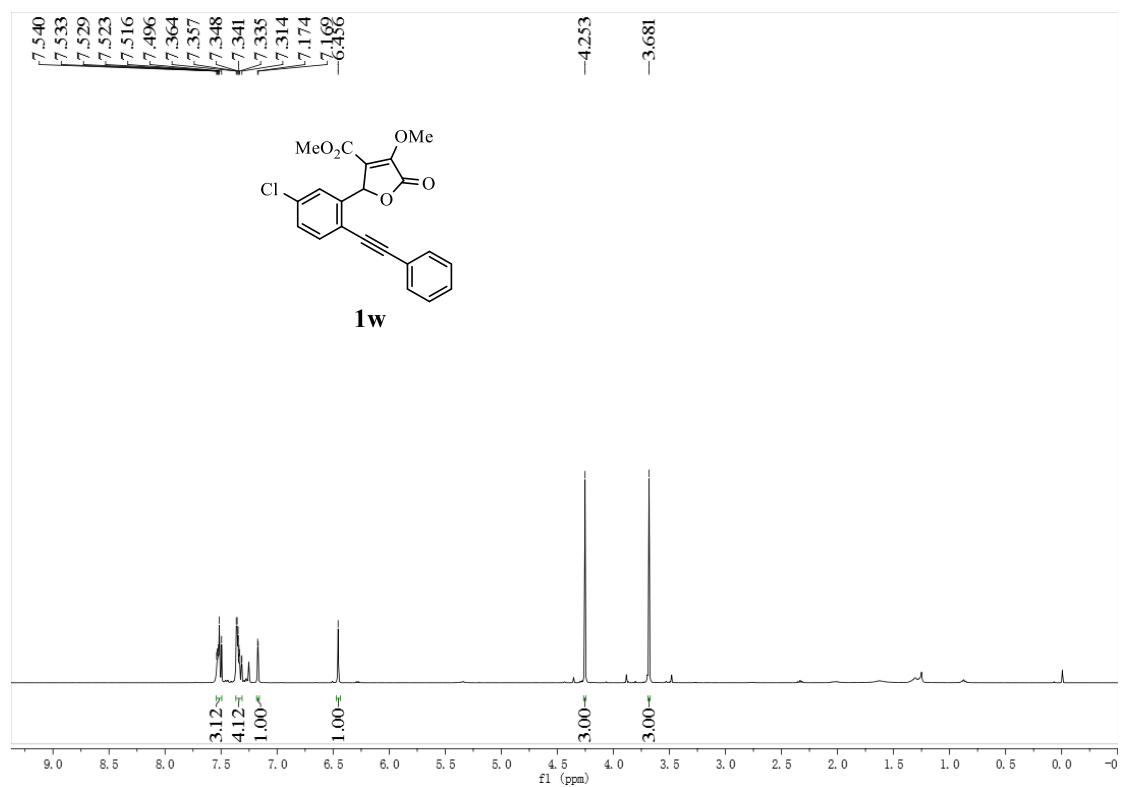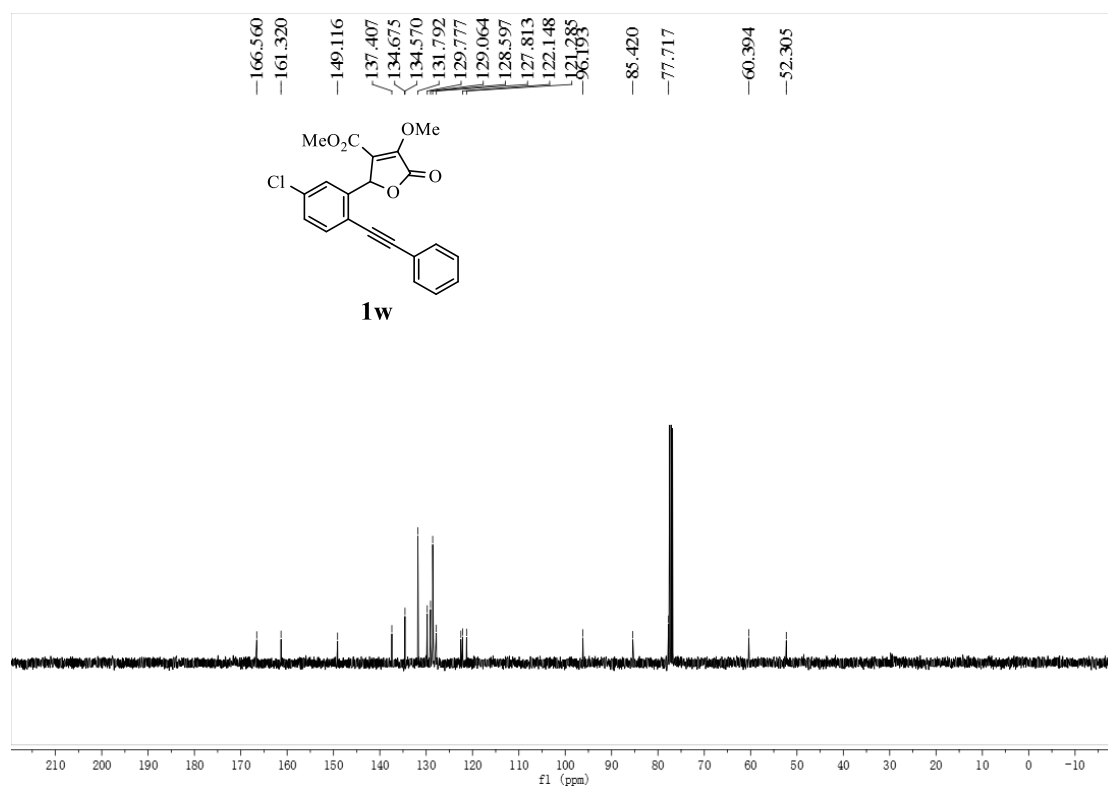

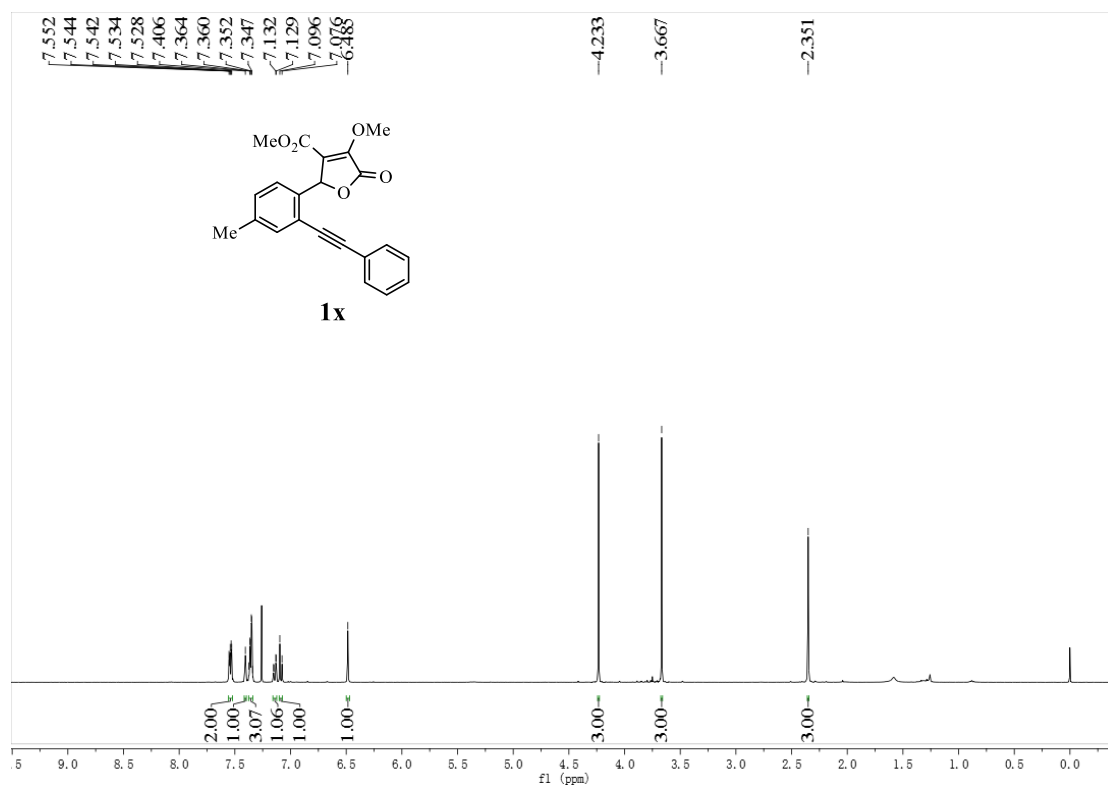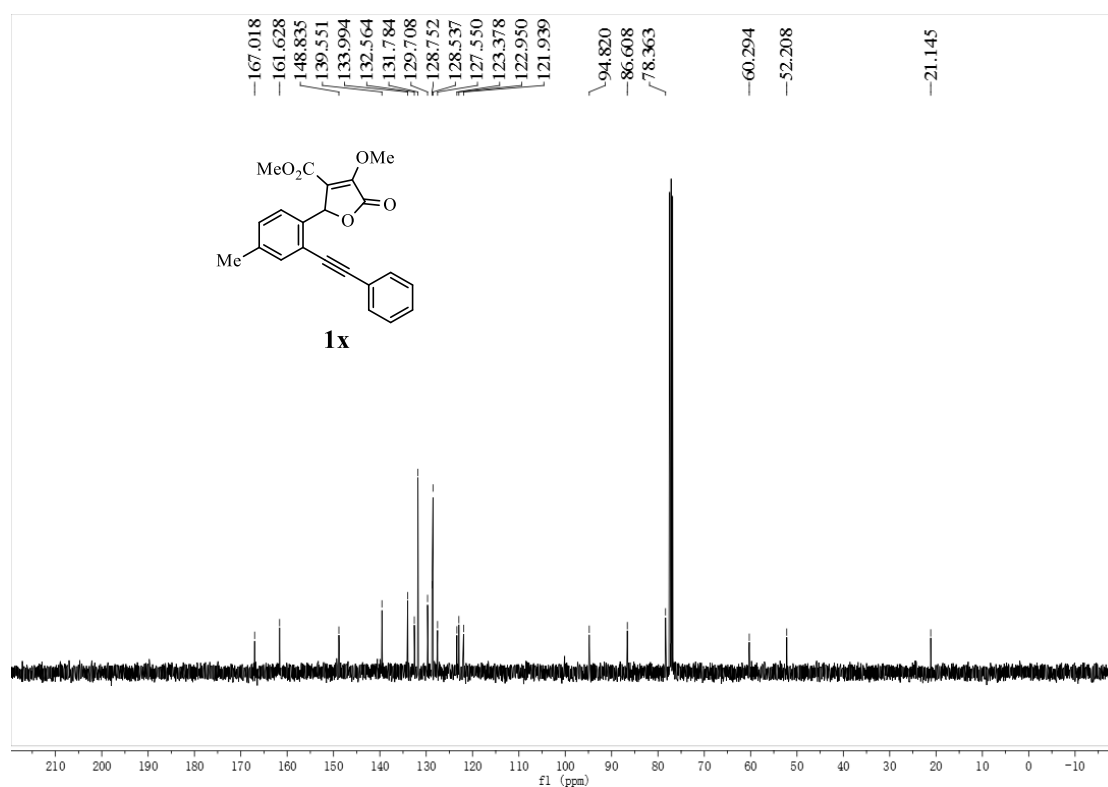

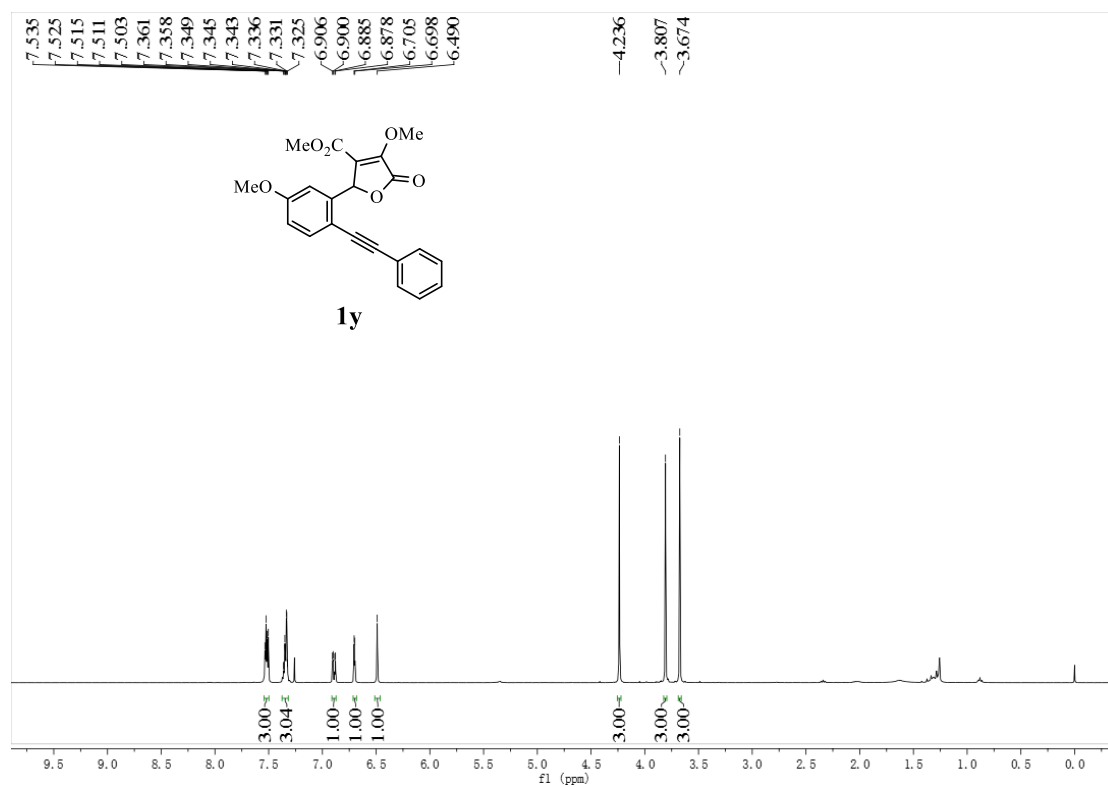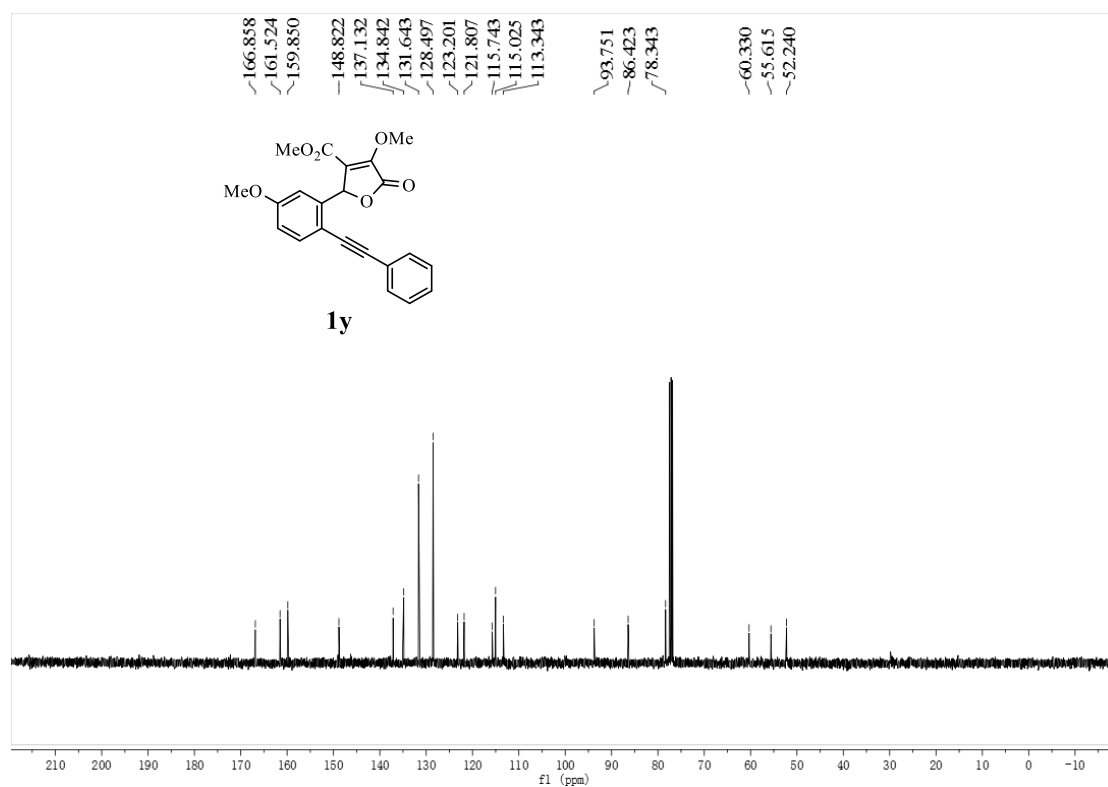

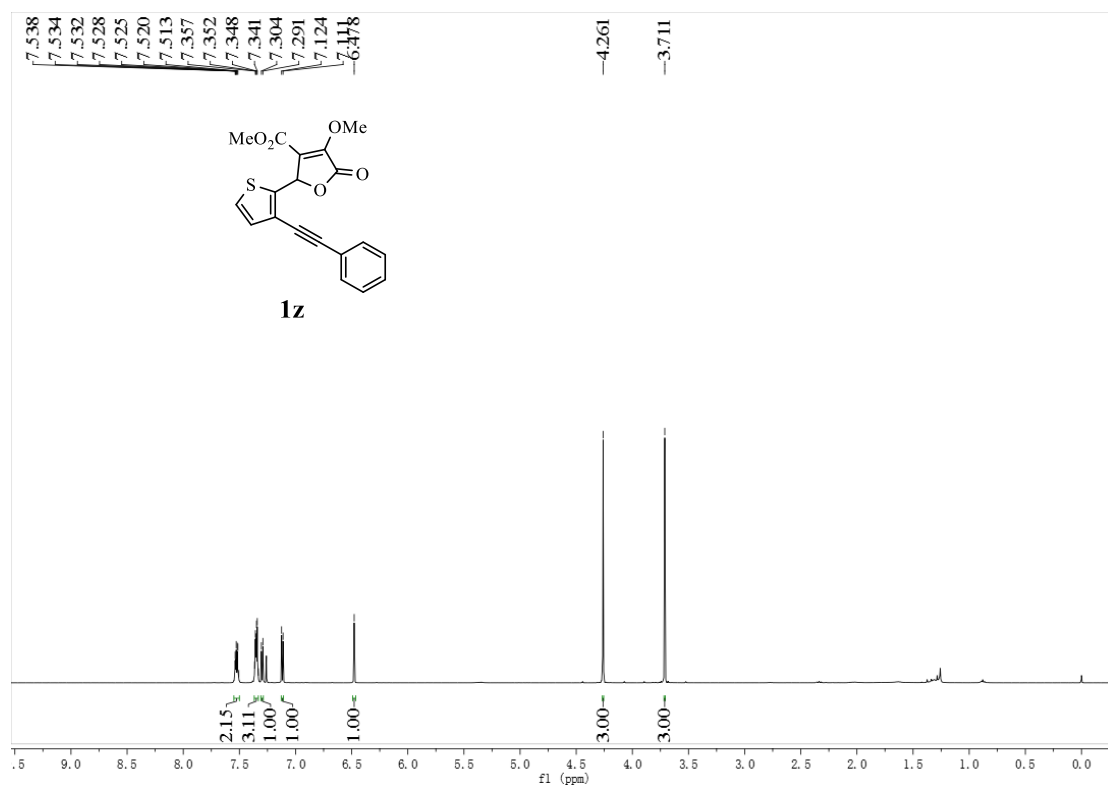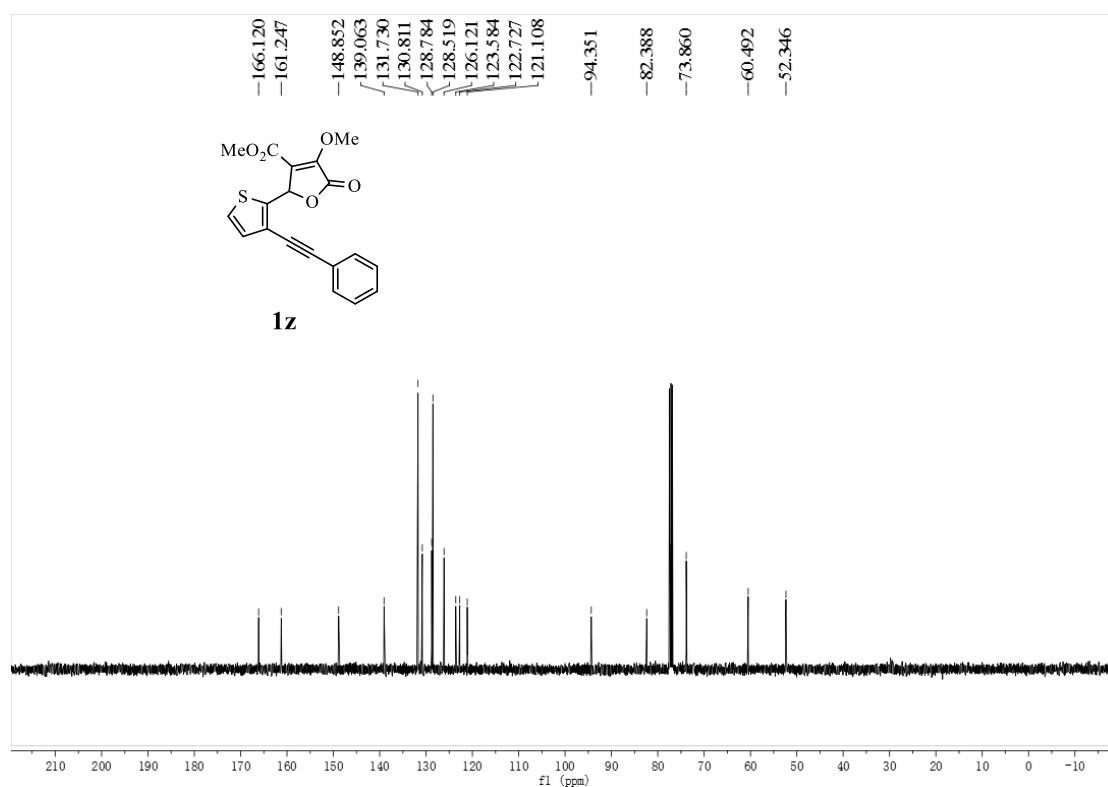

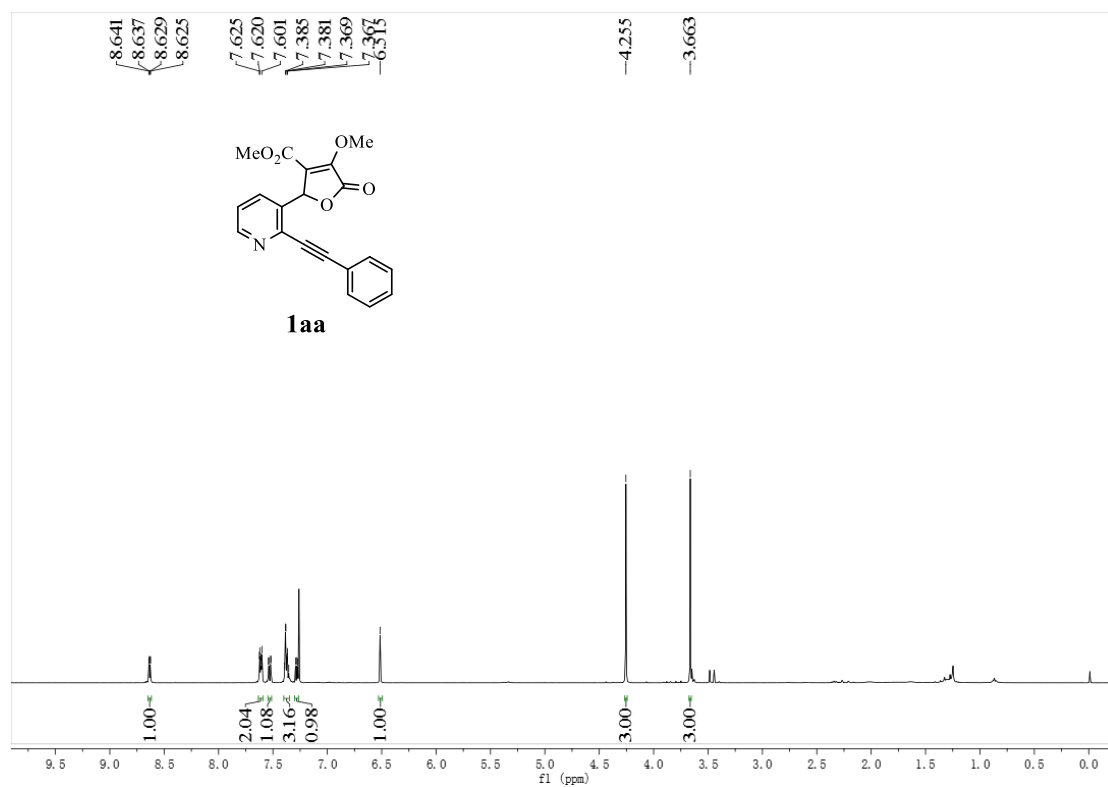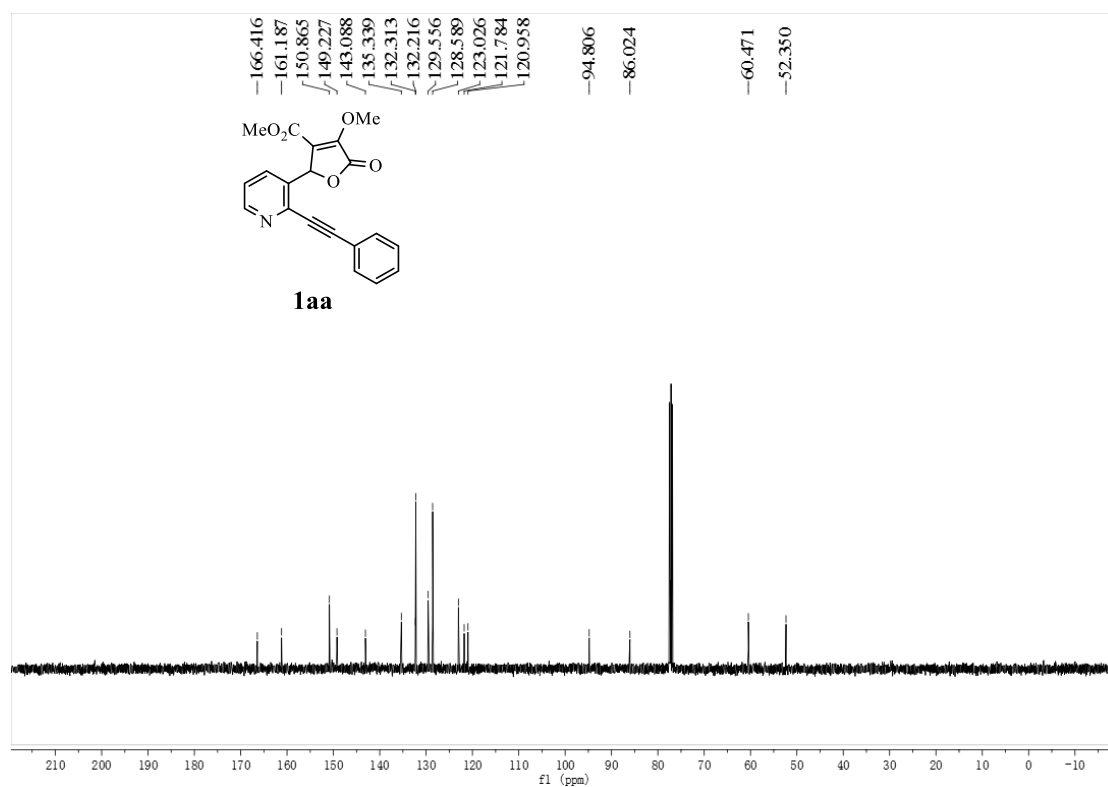

# HMQC spectrum of 1aa

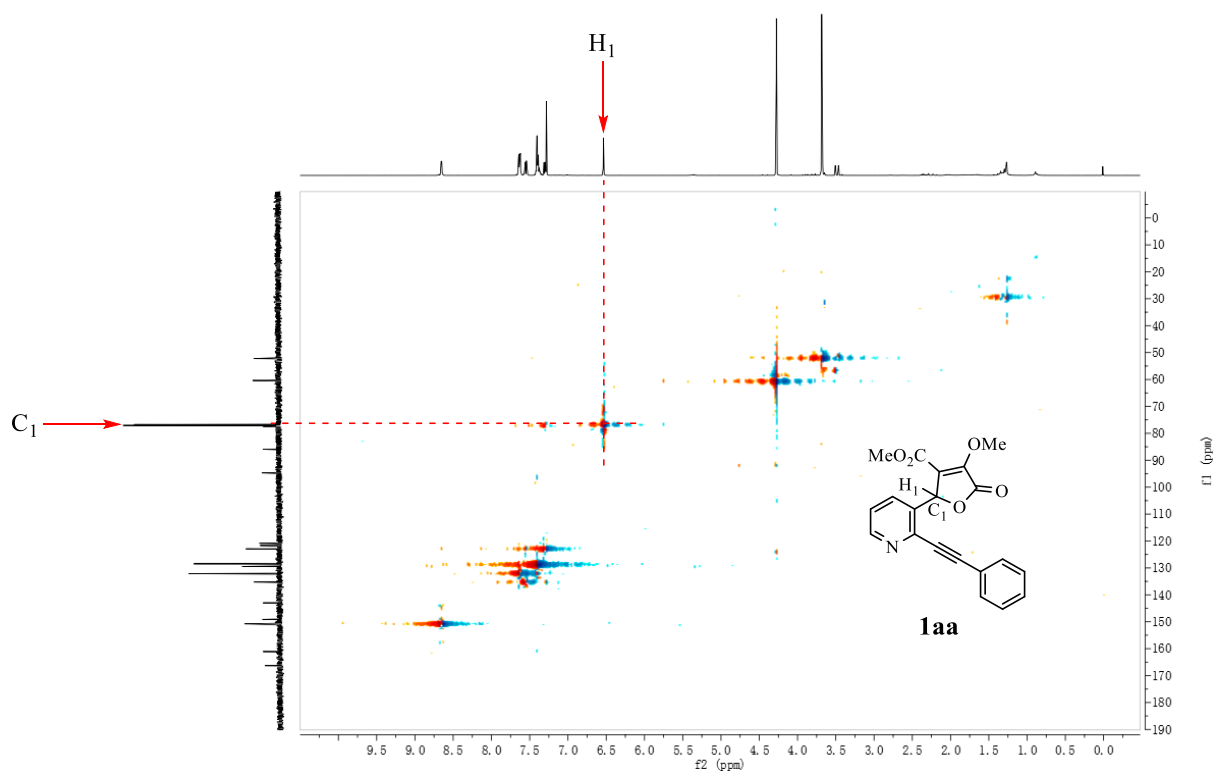

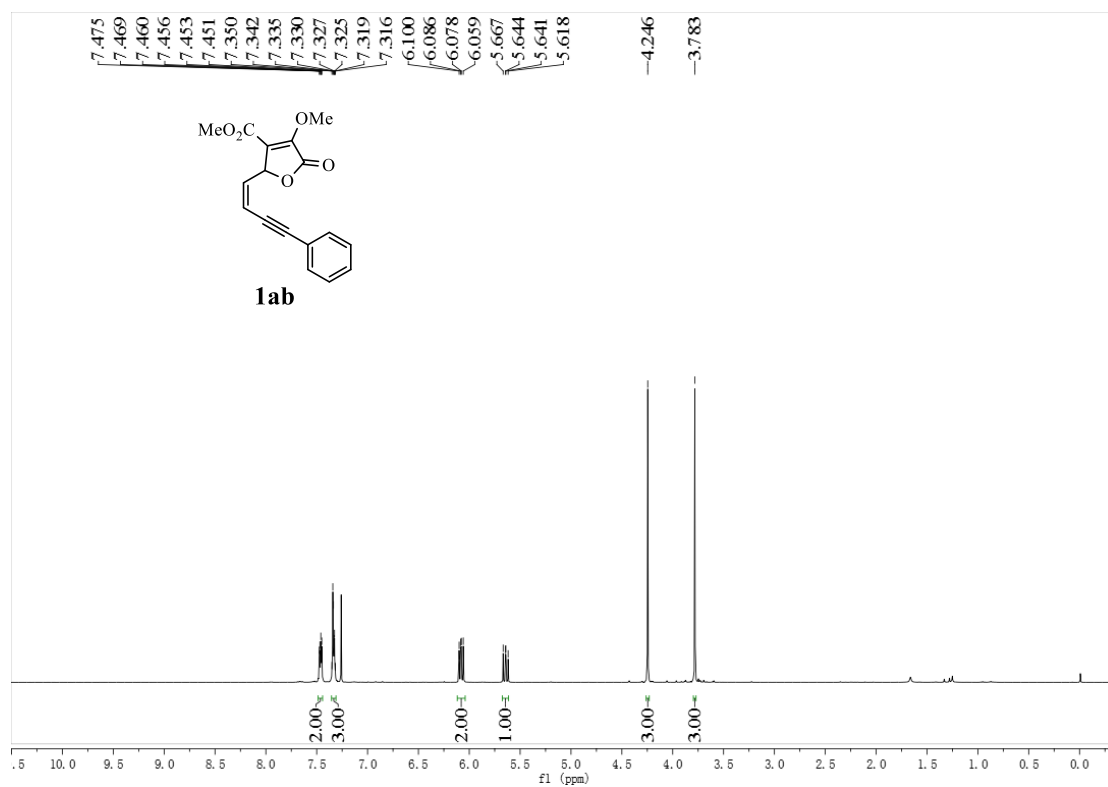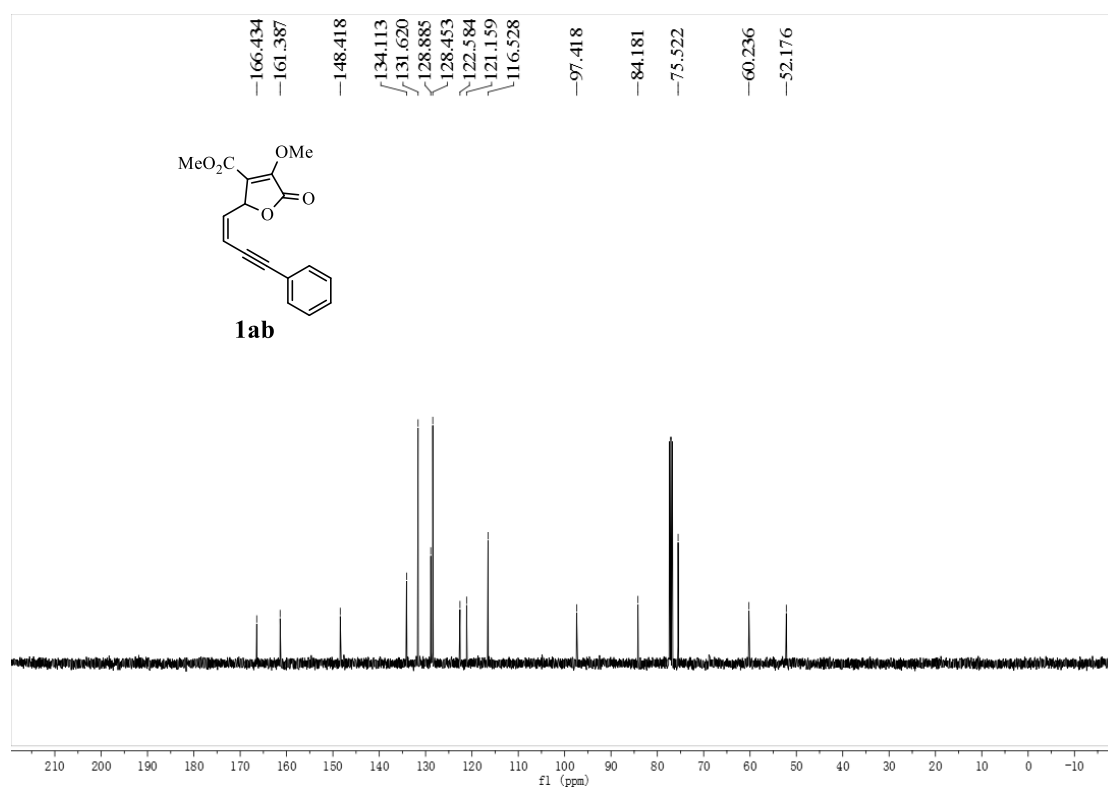

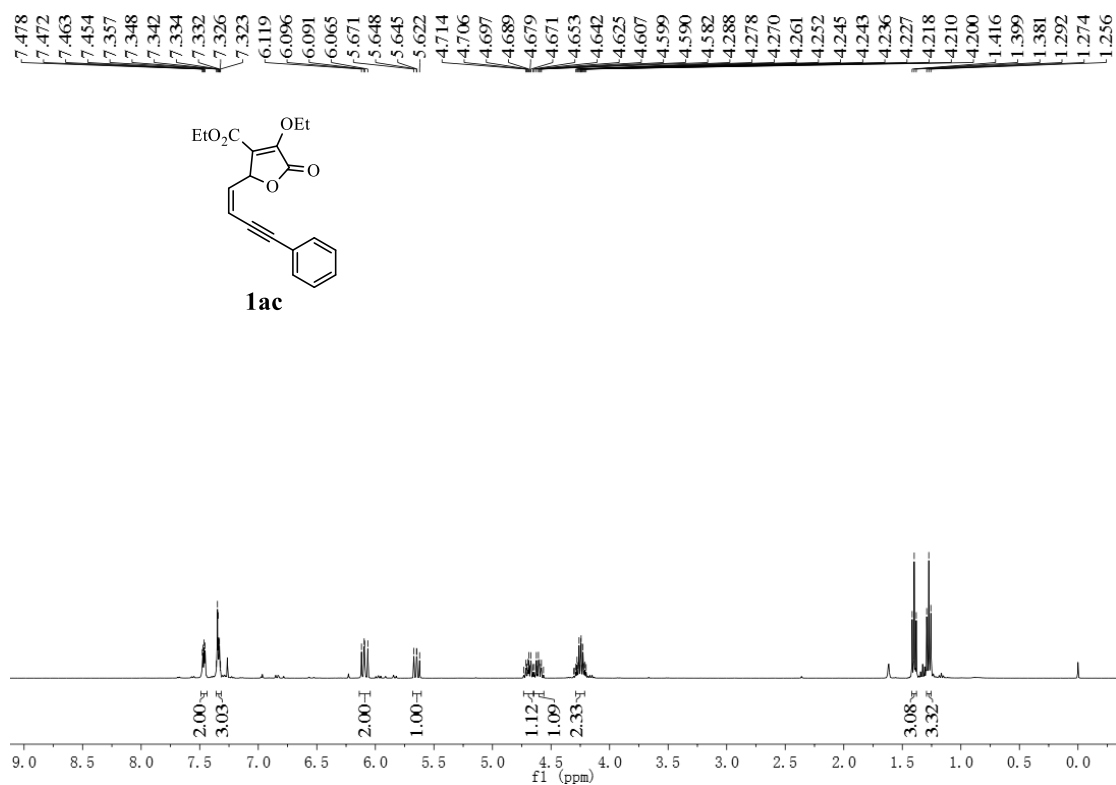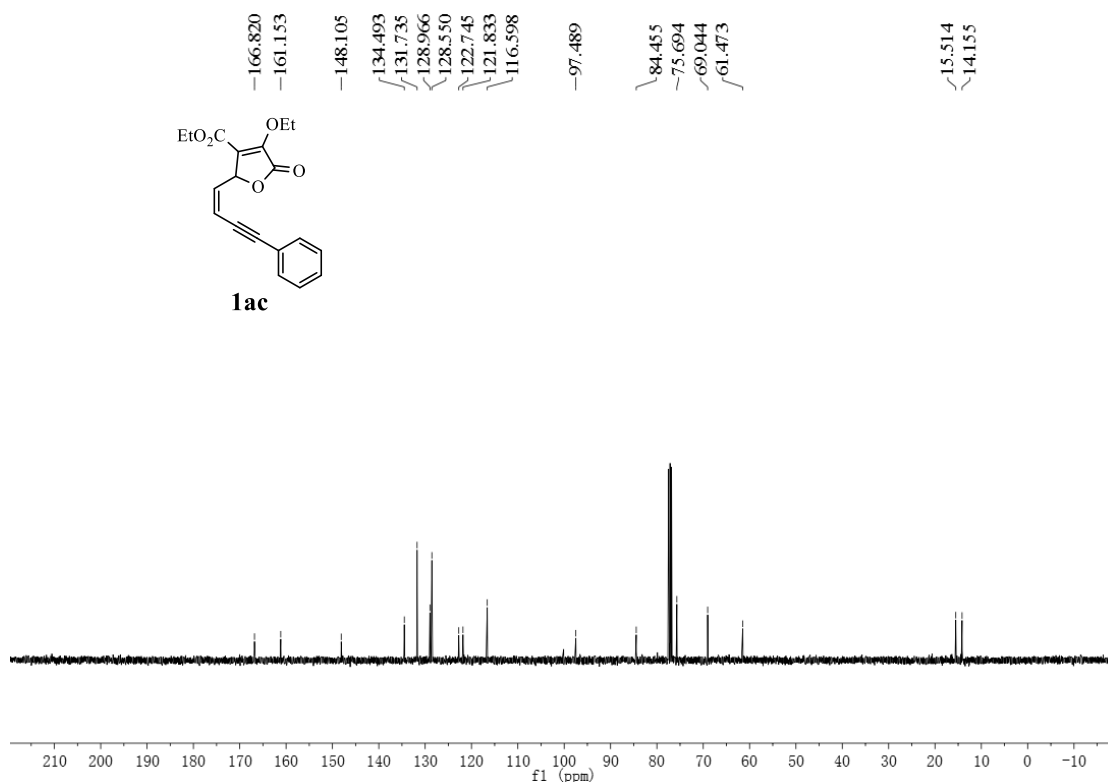



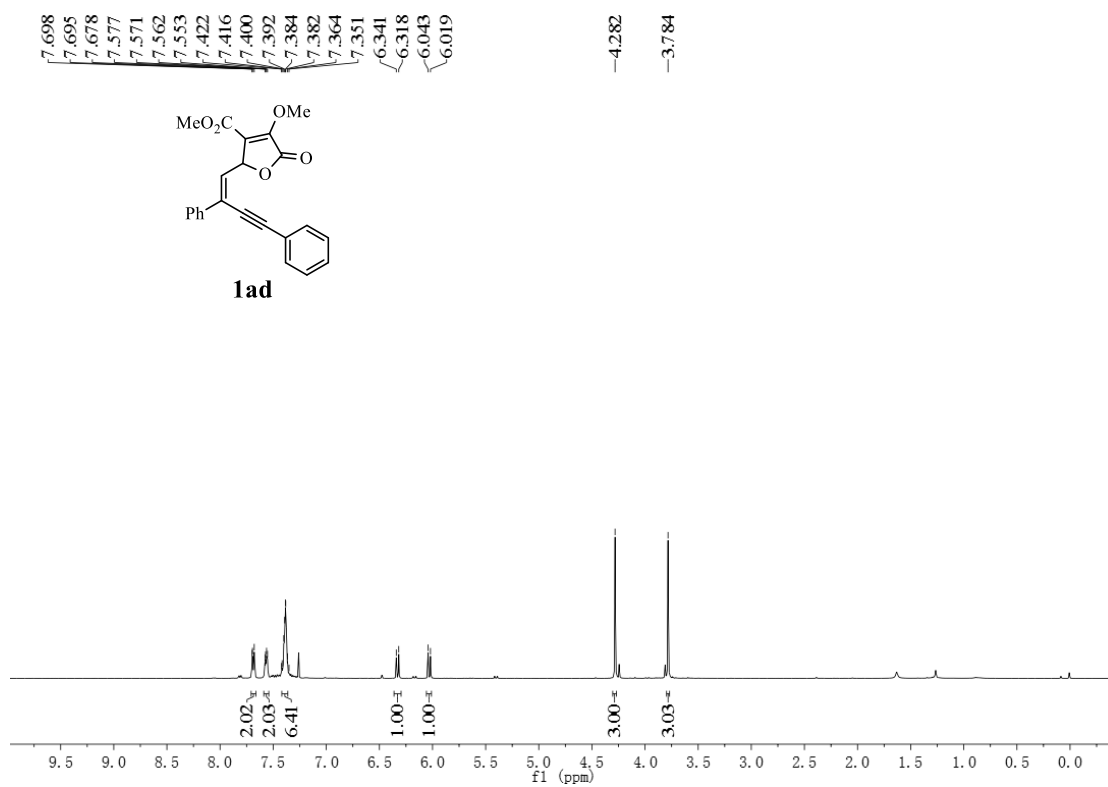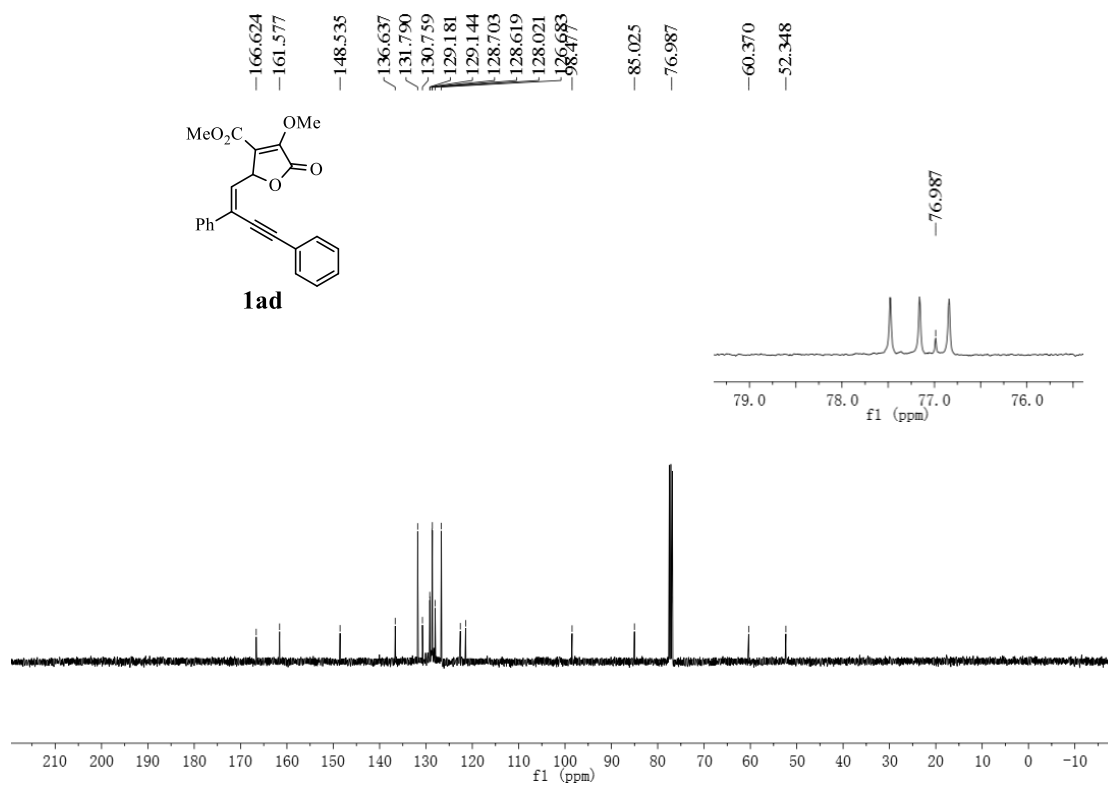

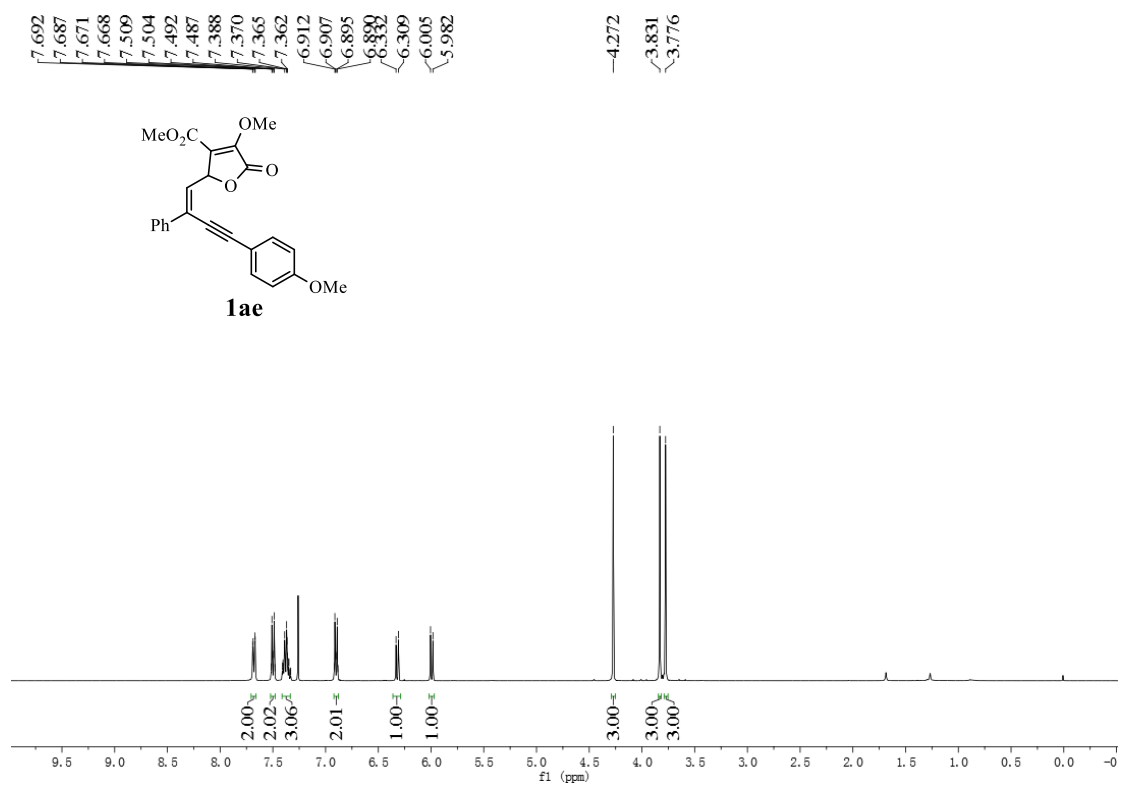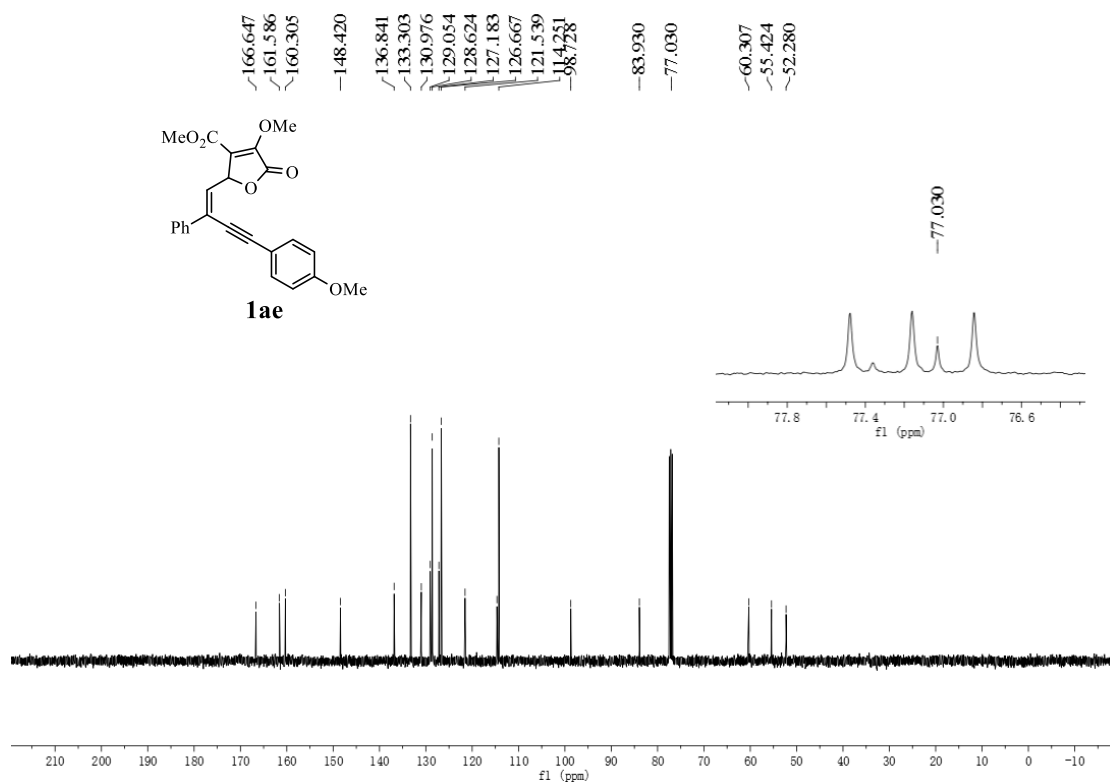

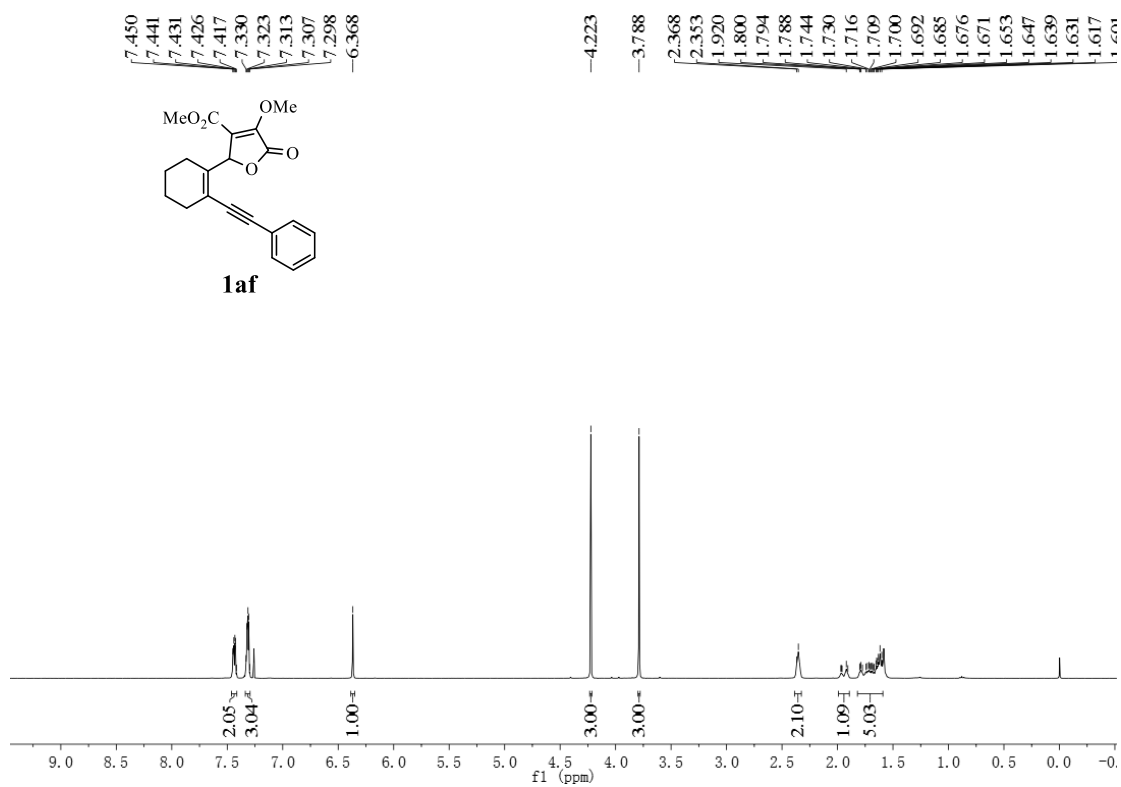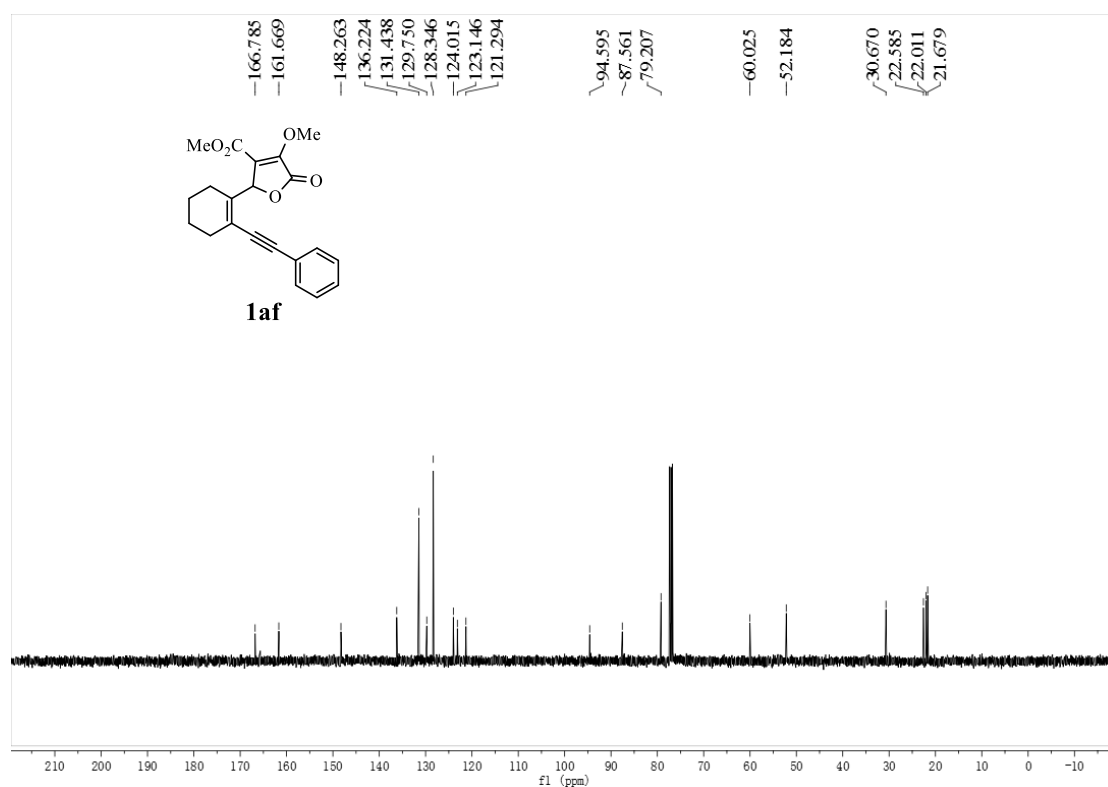

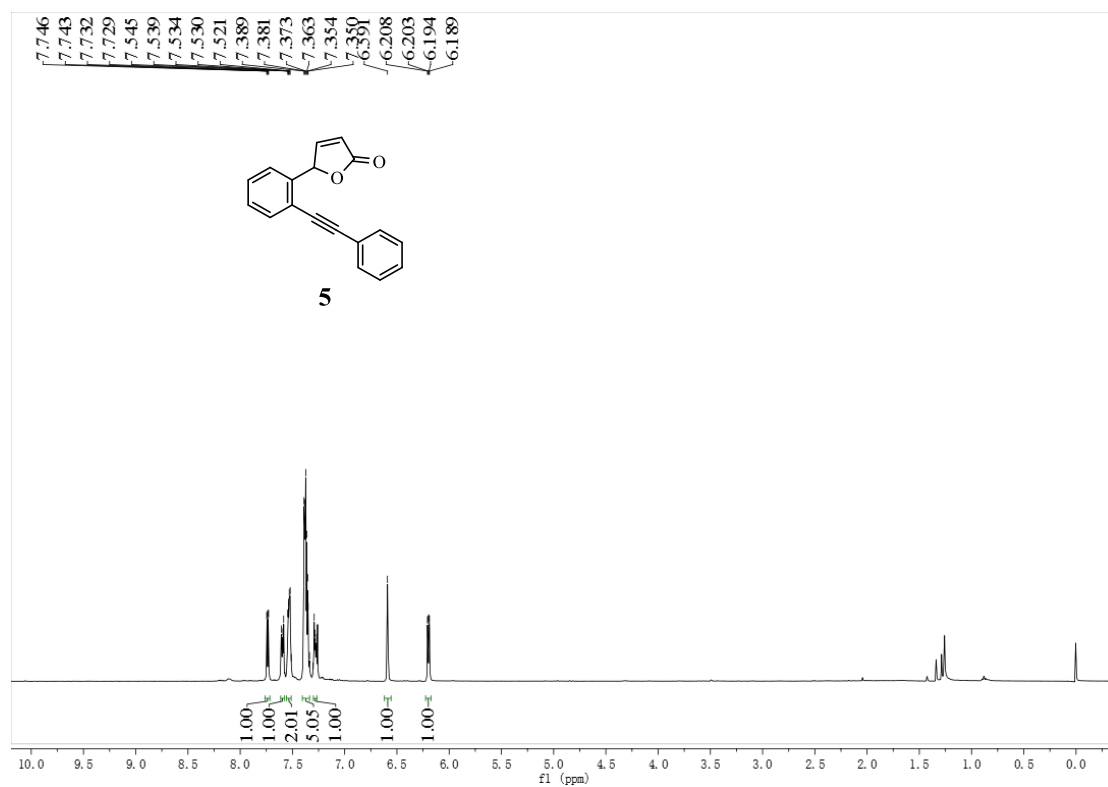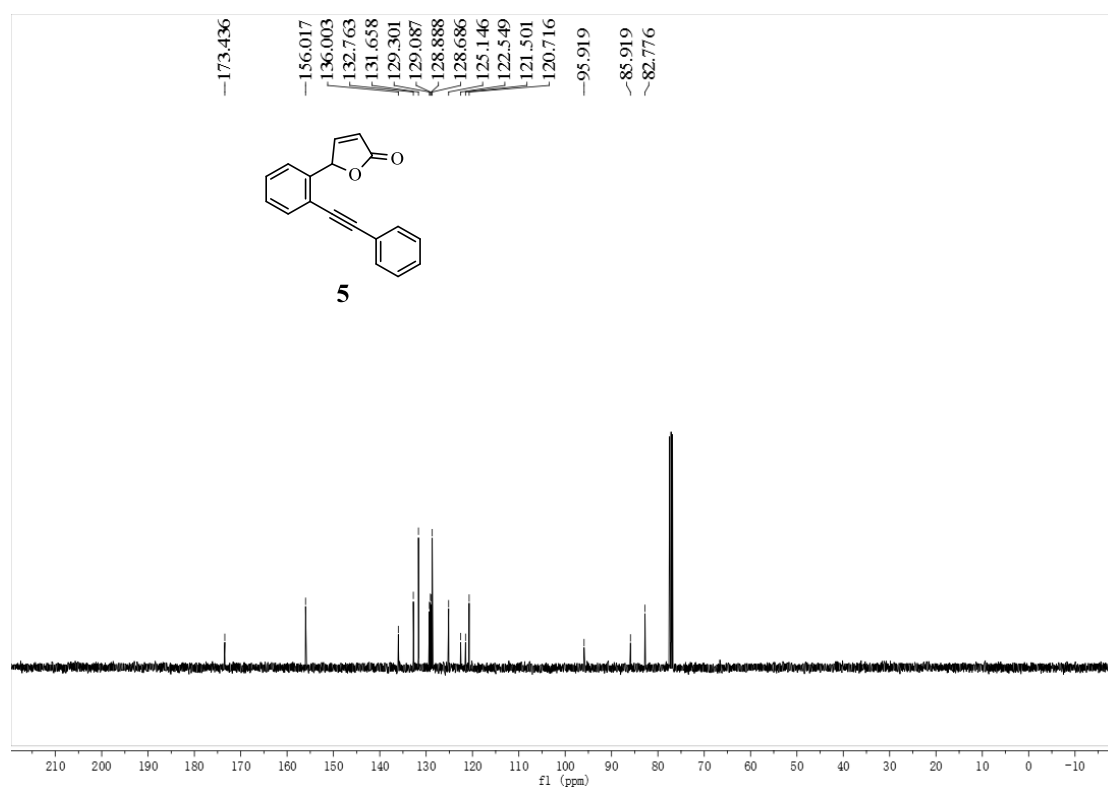

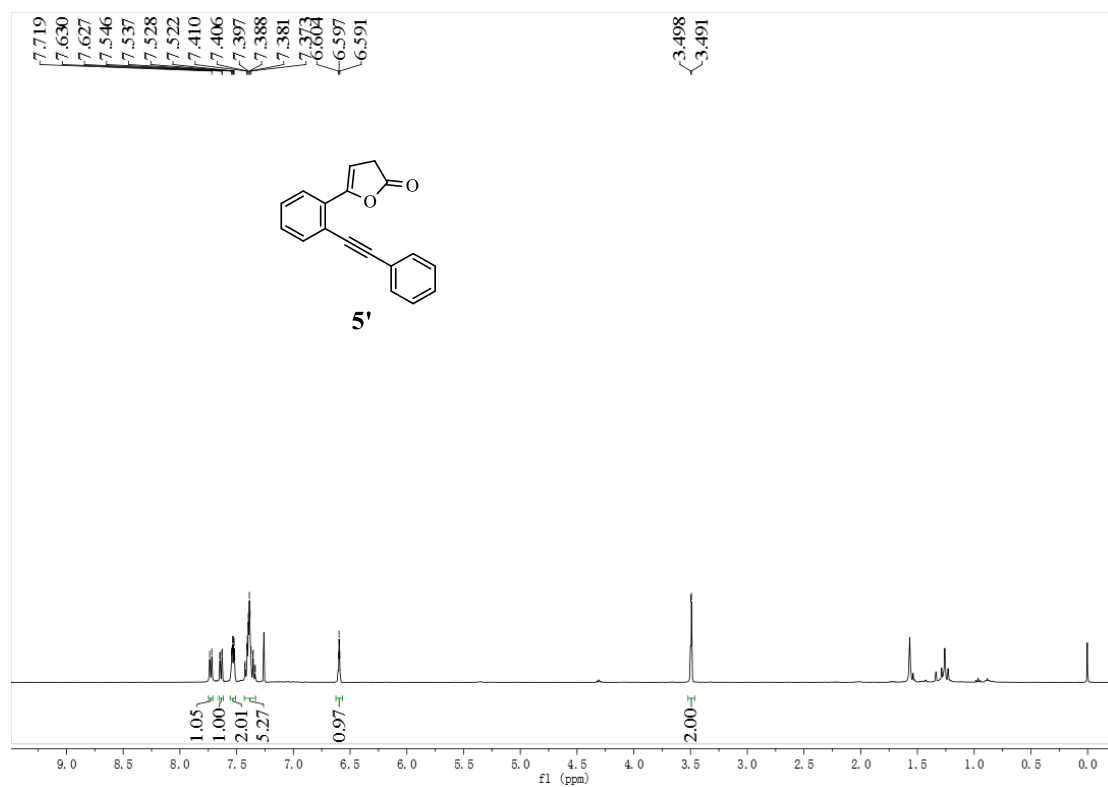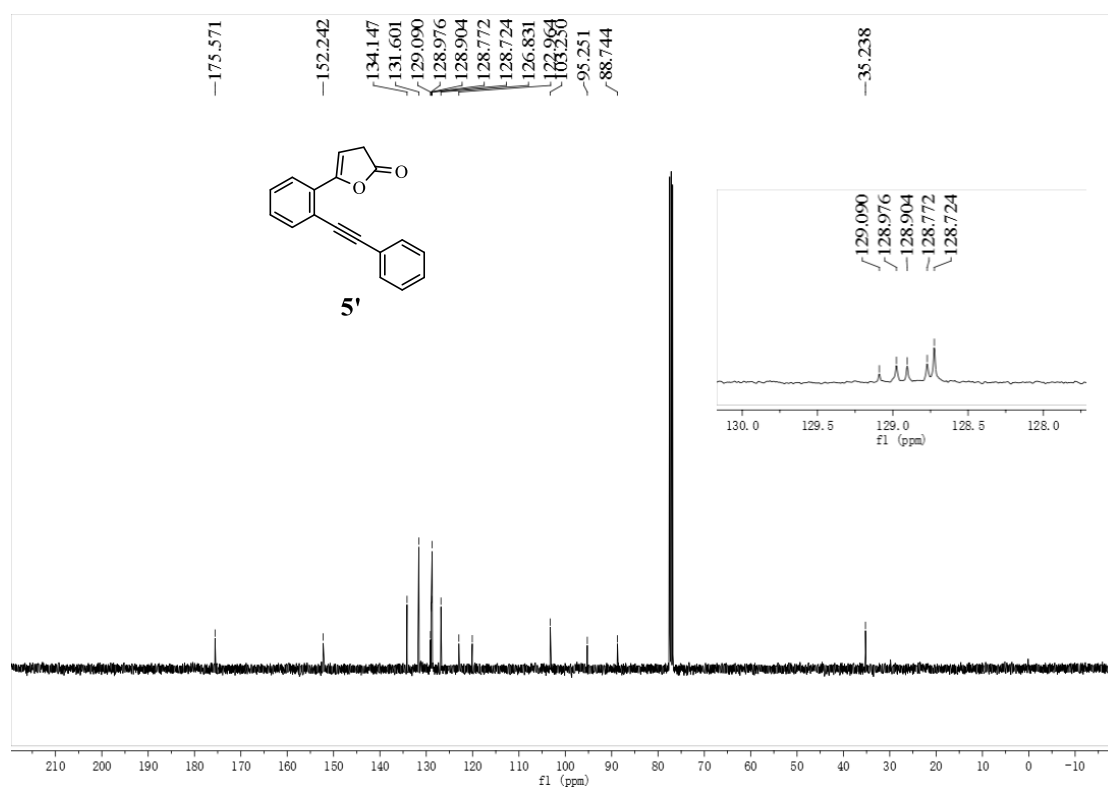

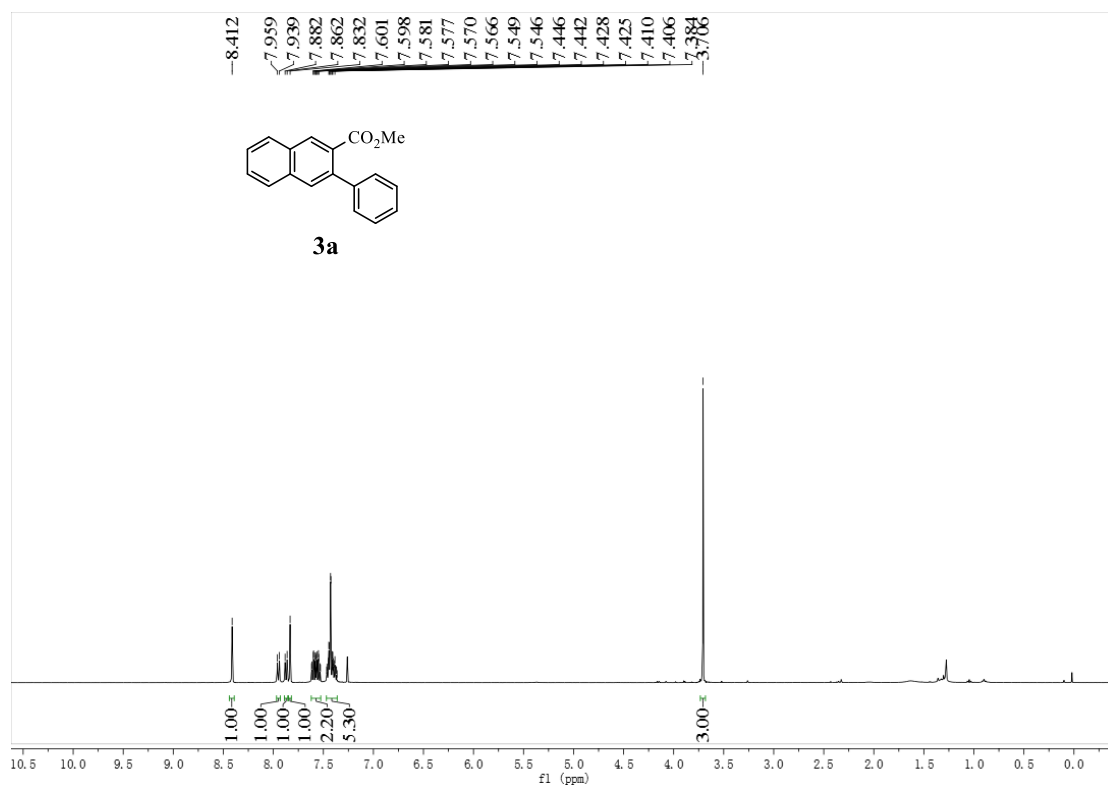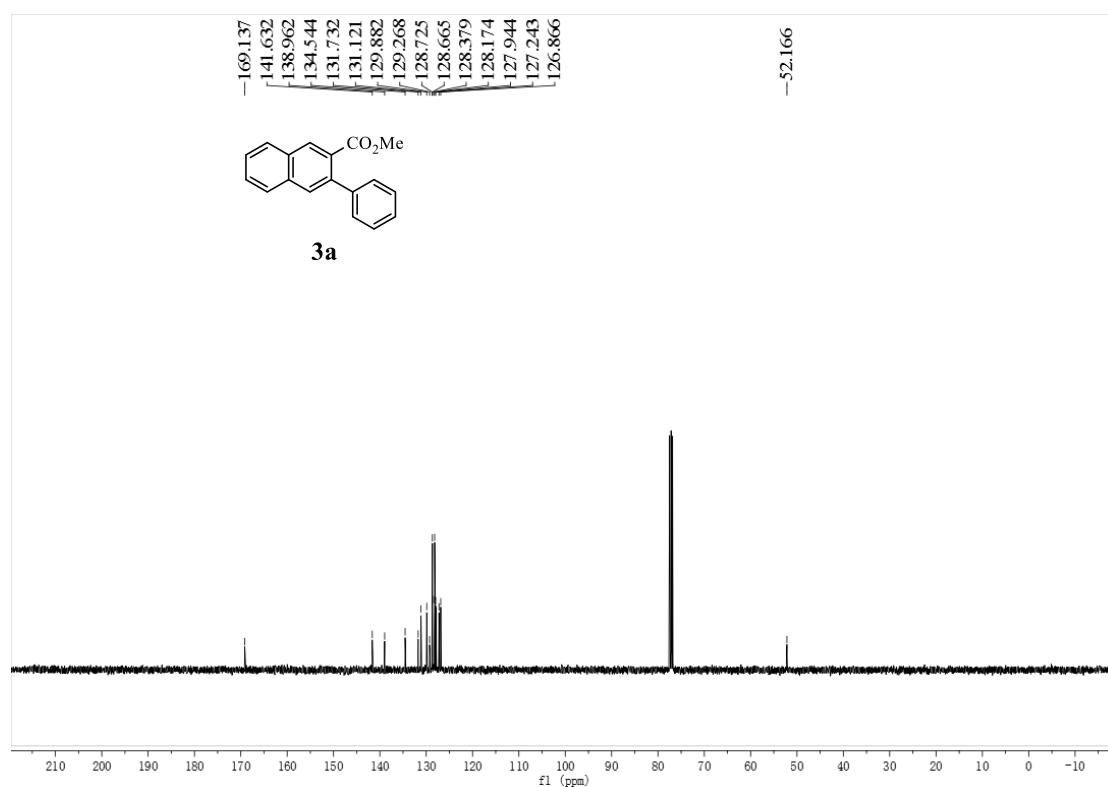

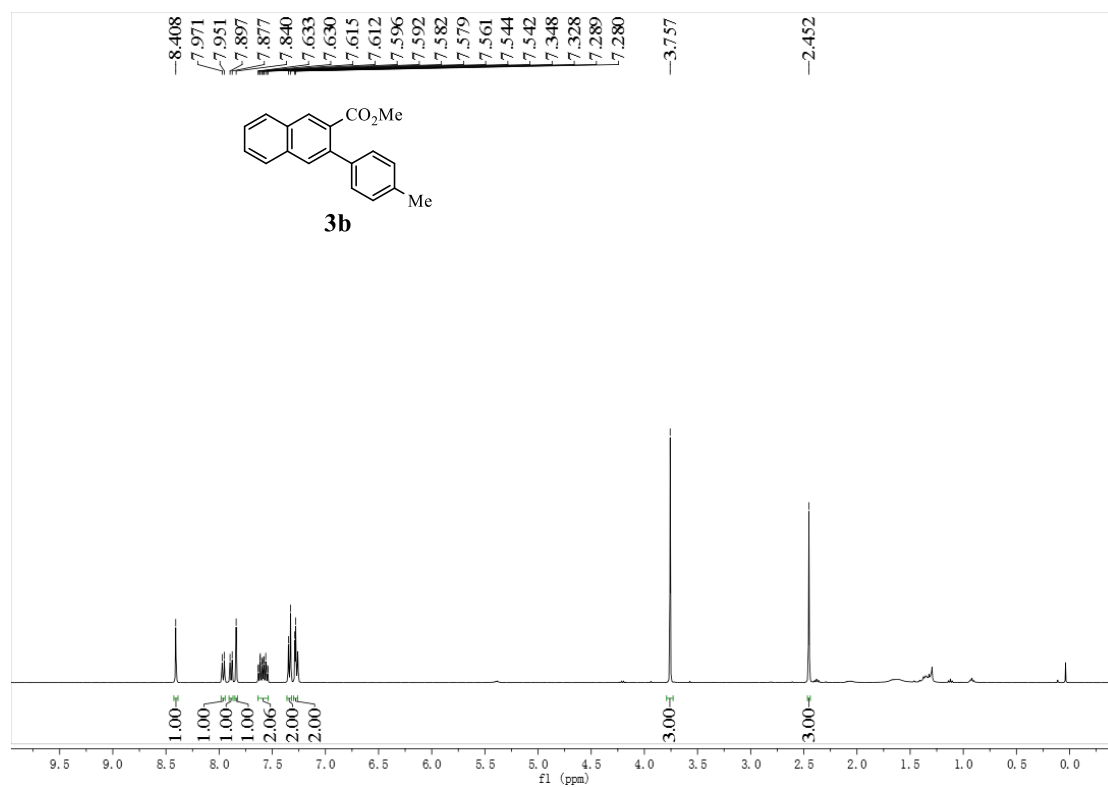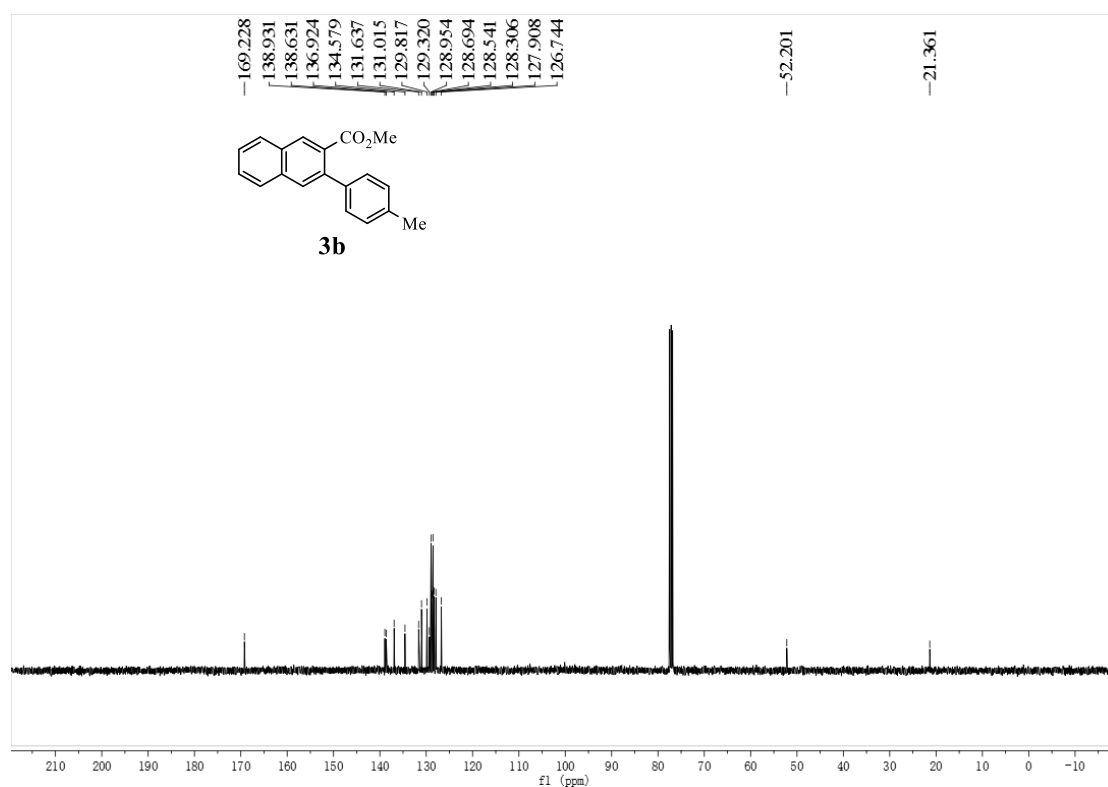

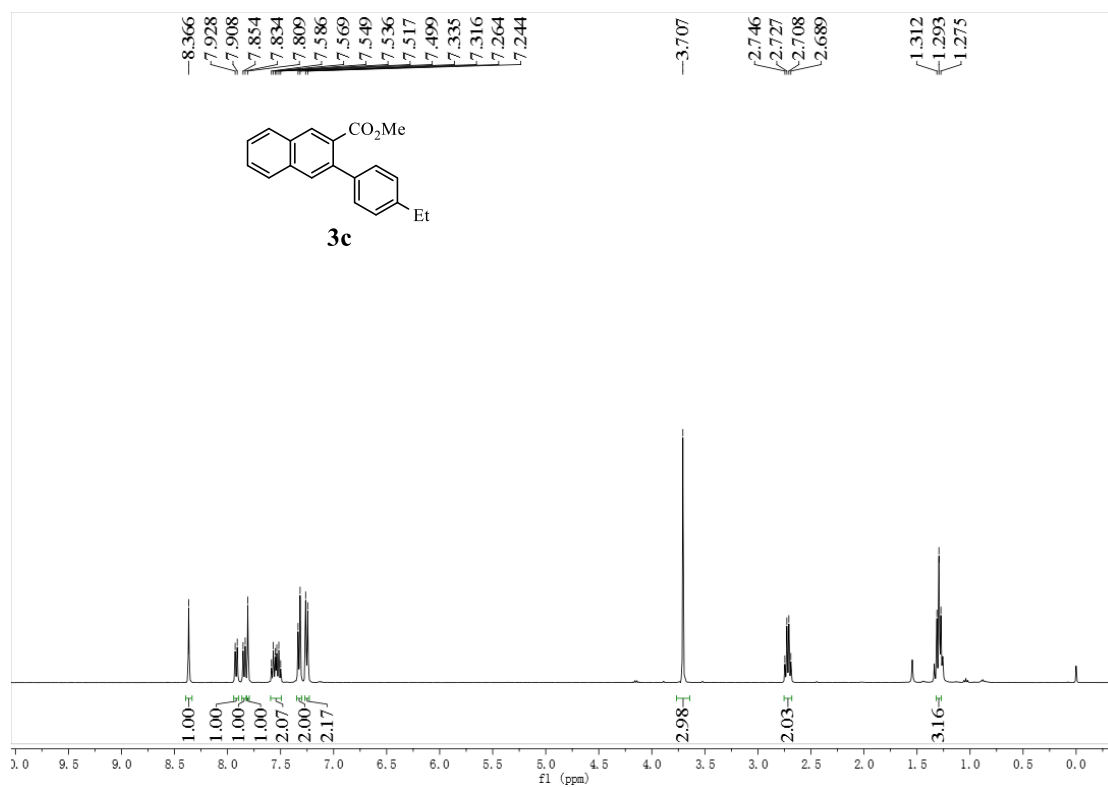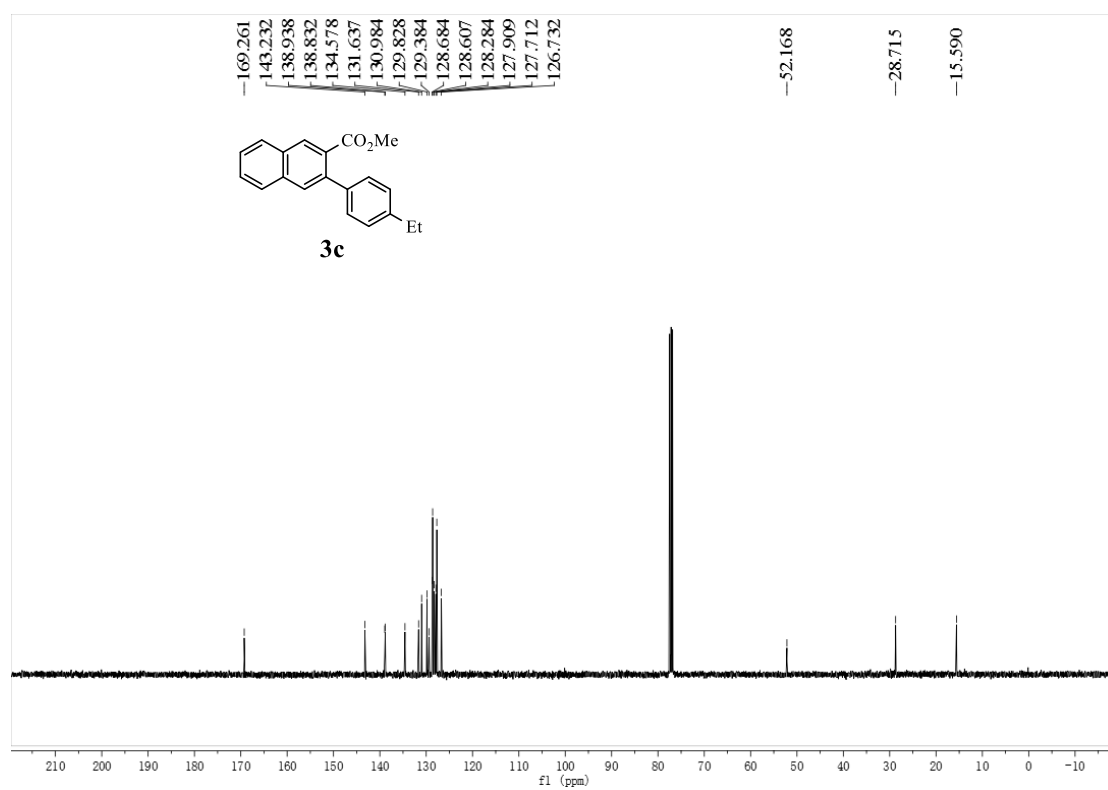



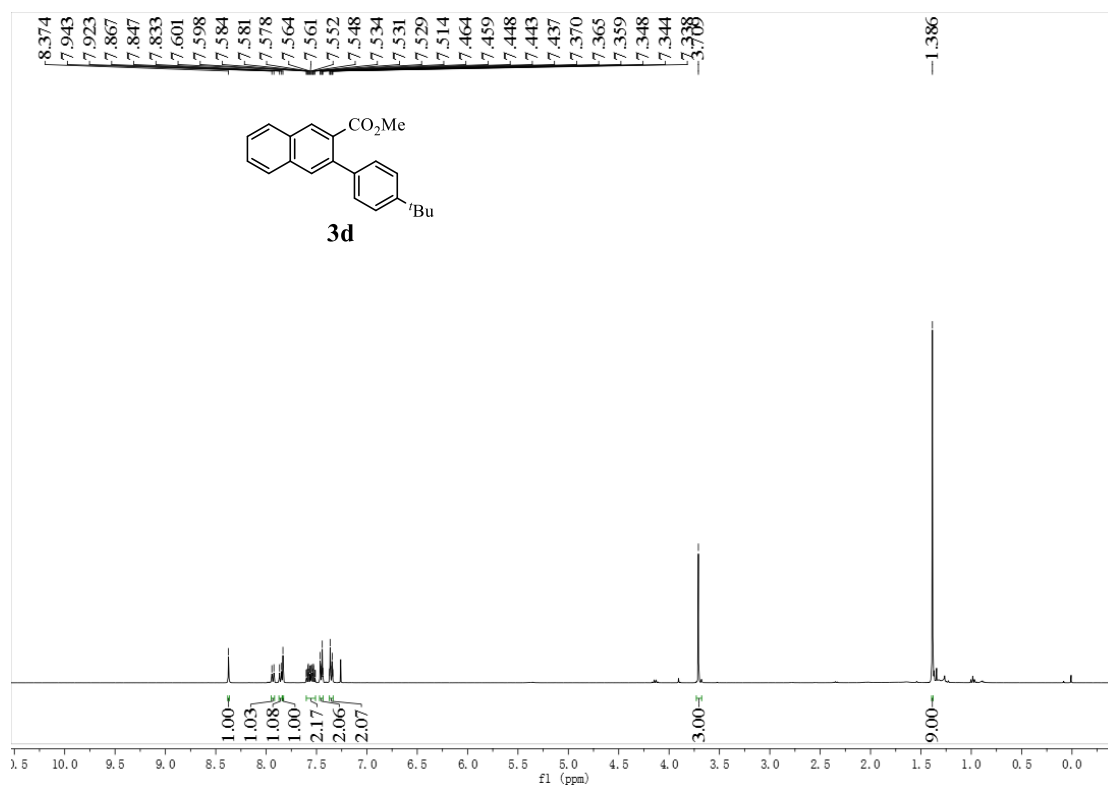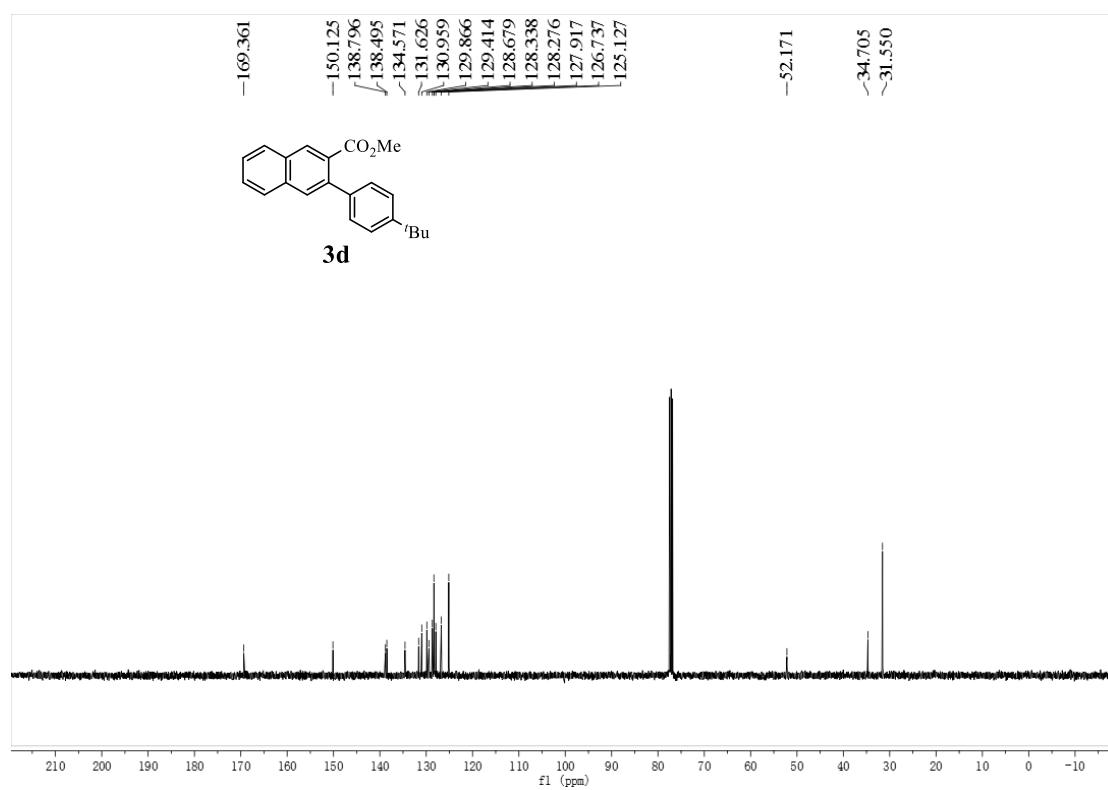

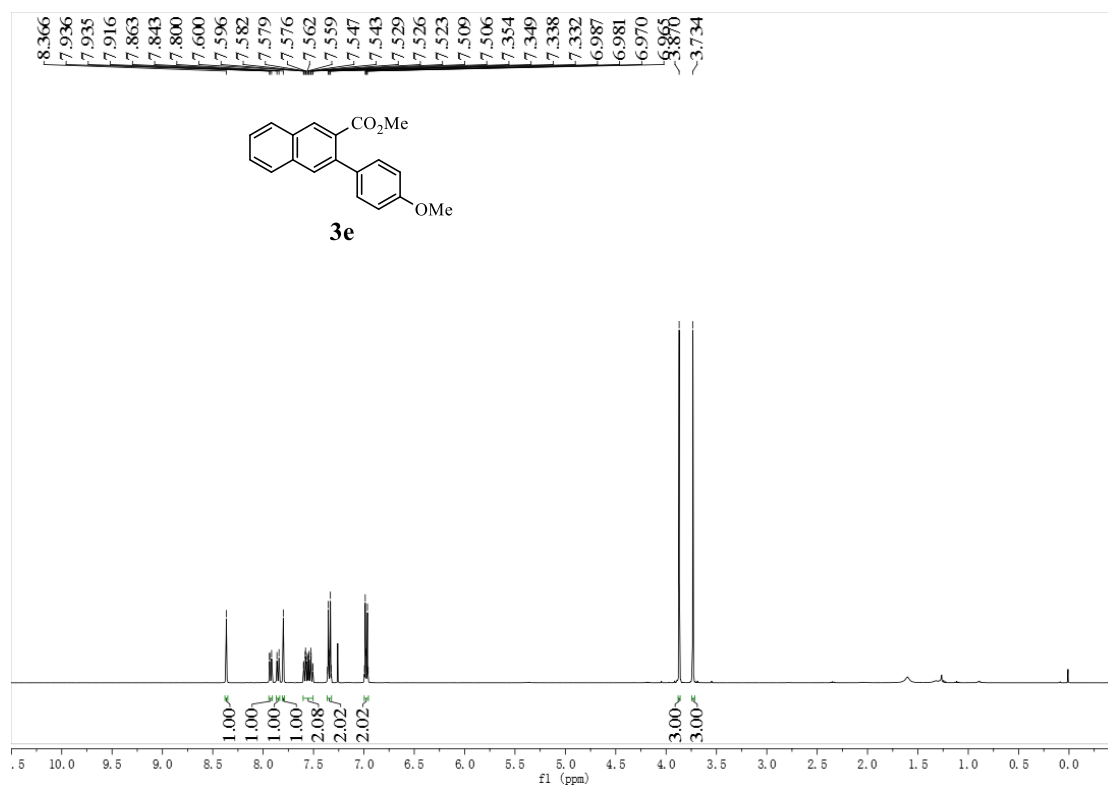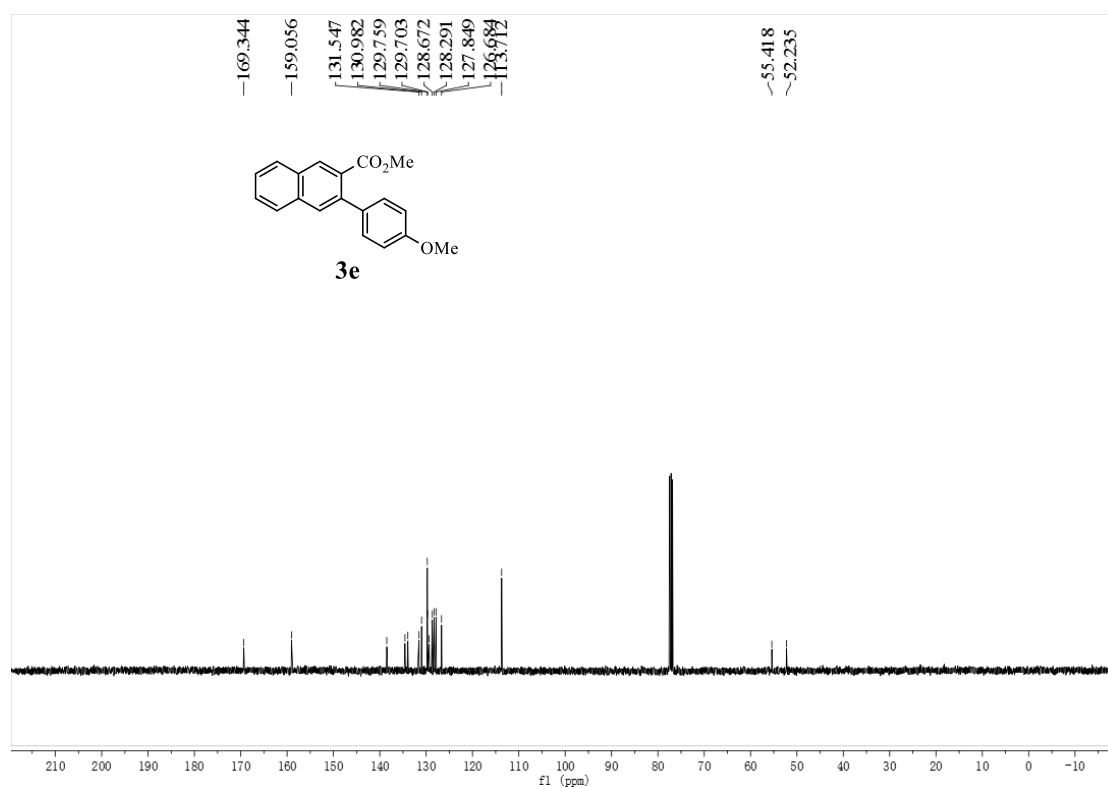

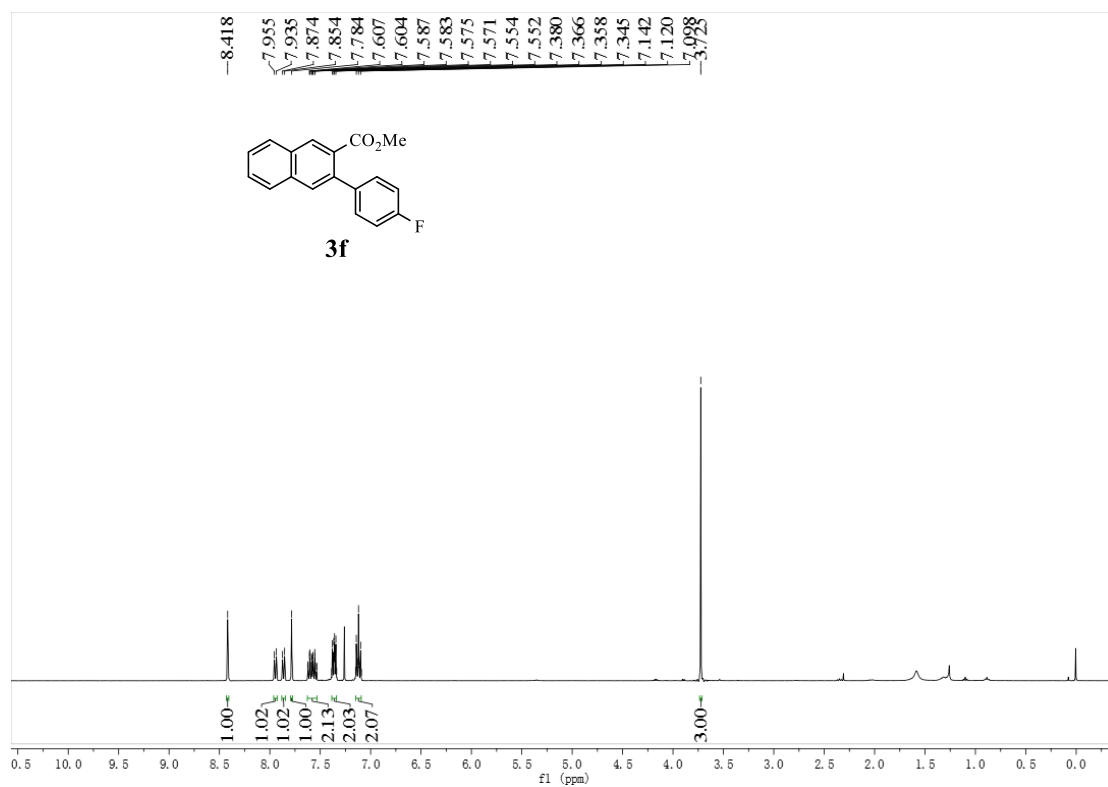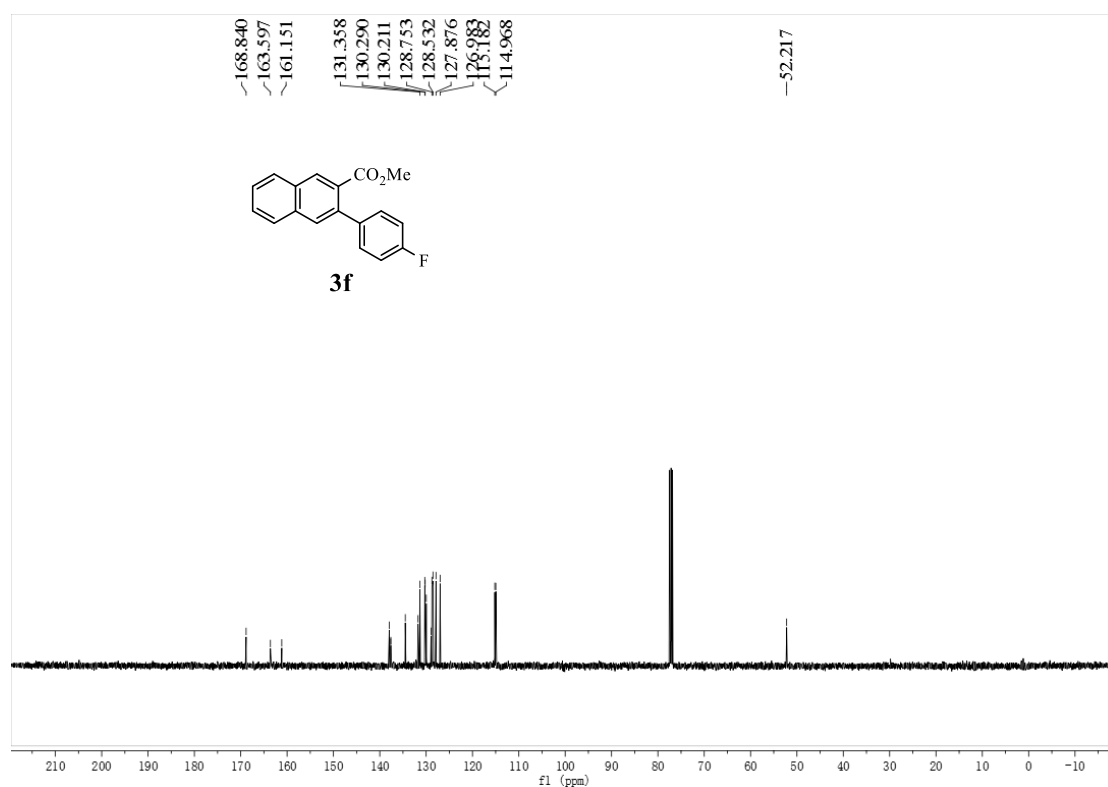

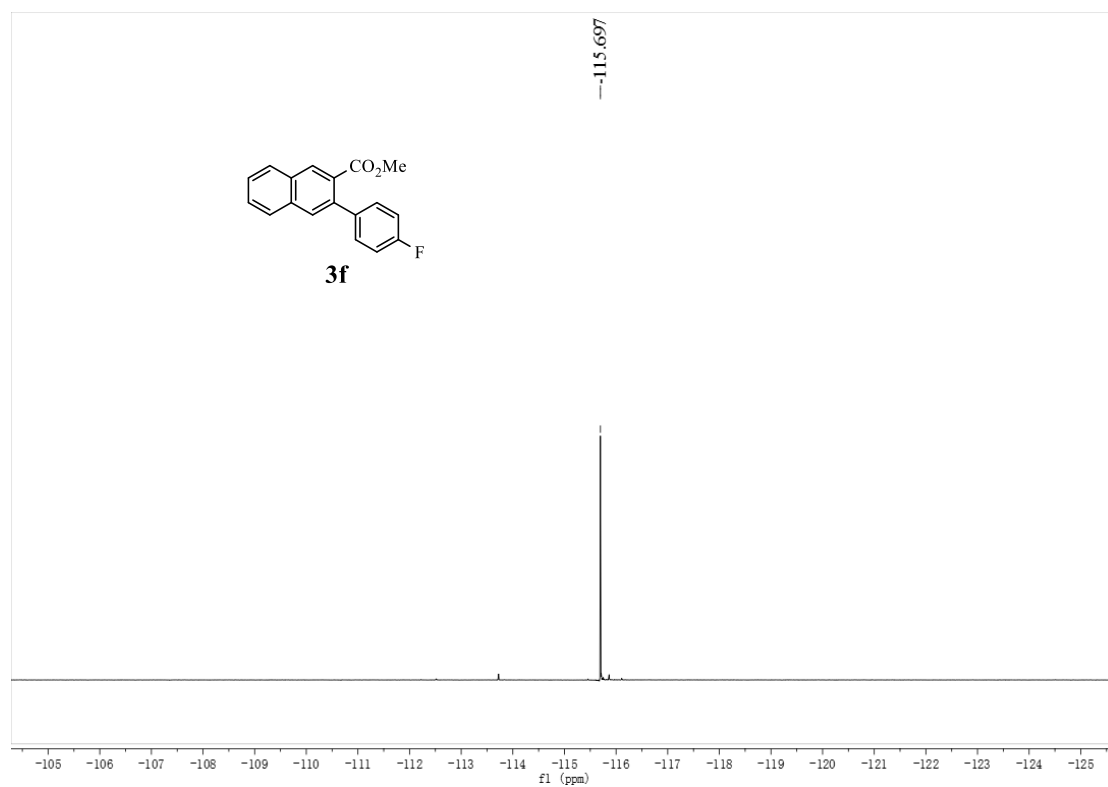

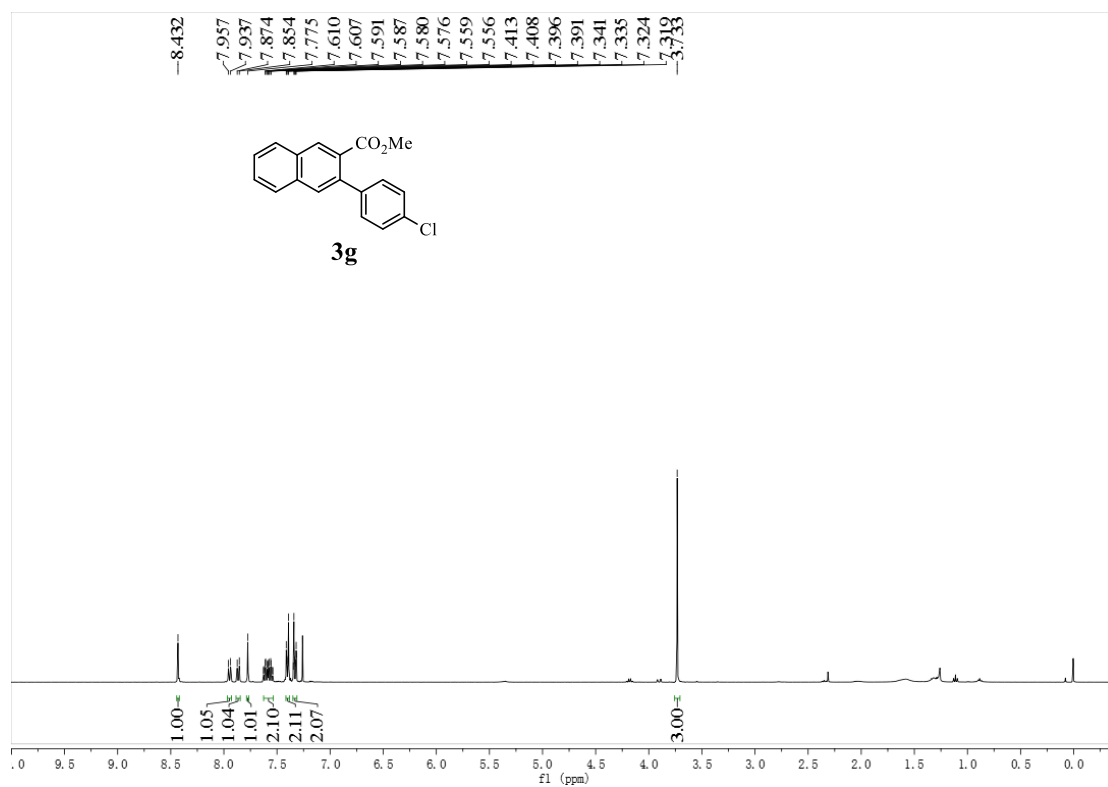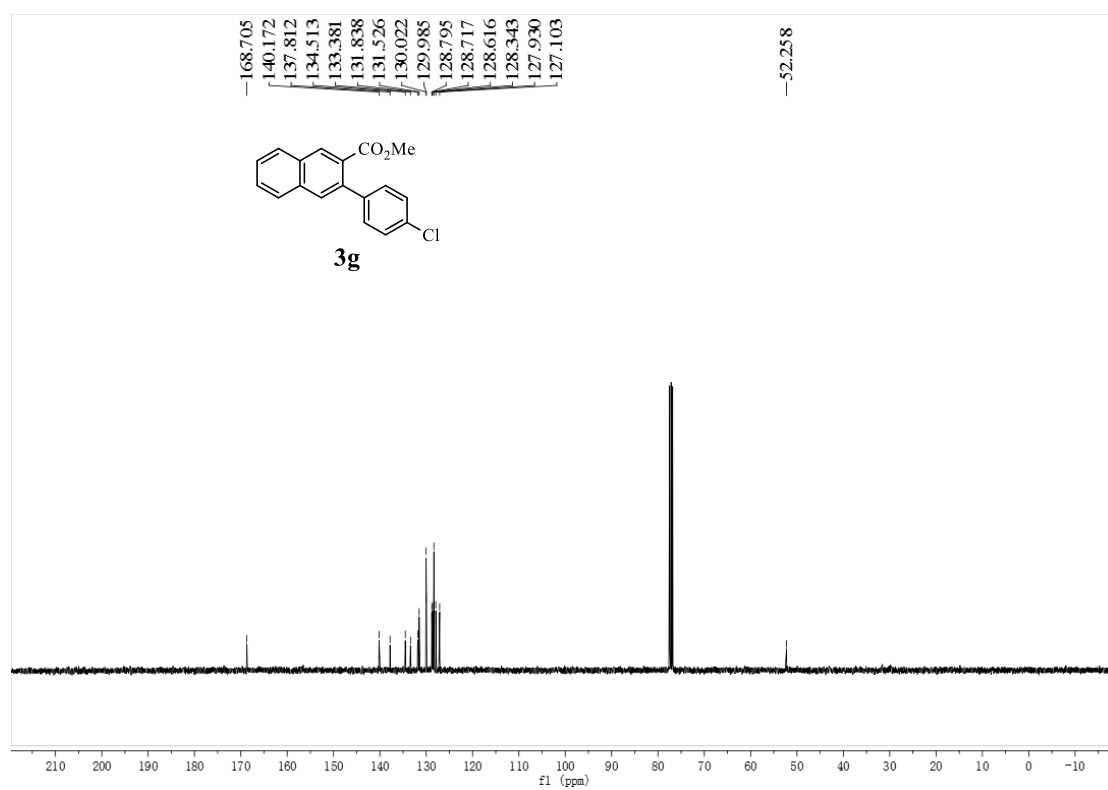

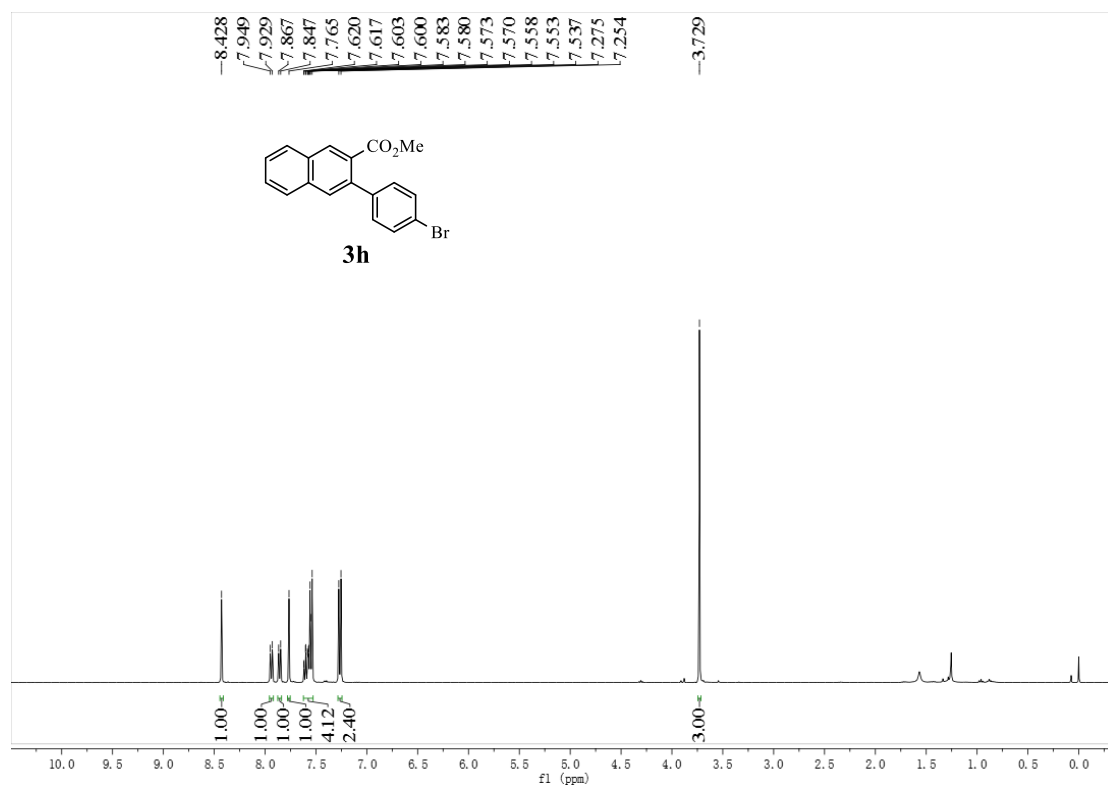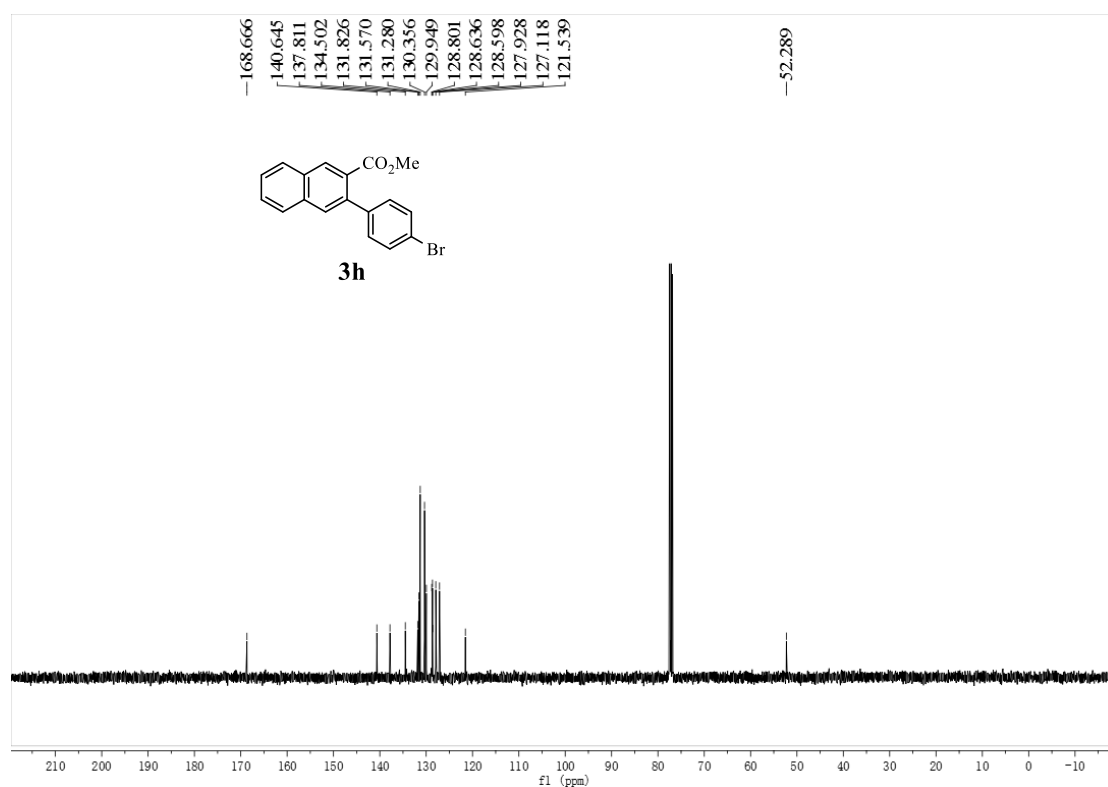

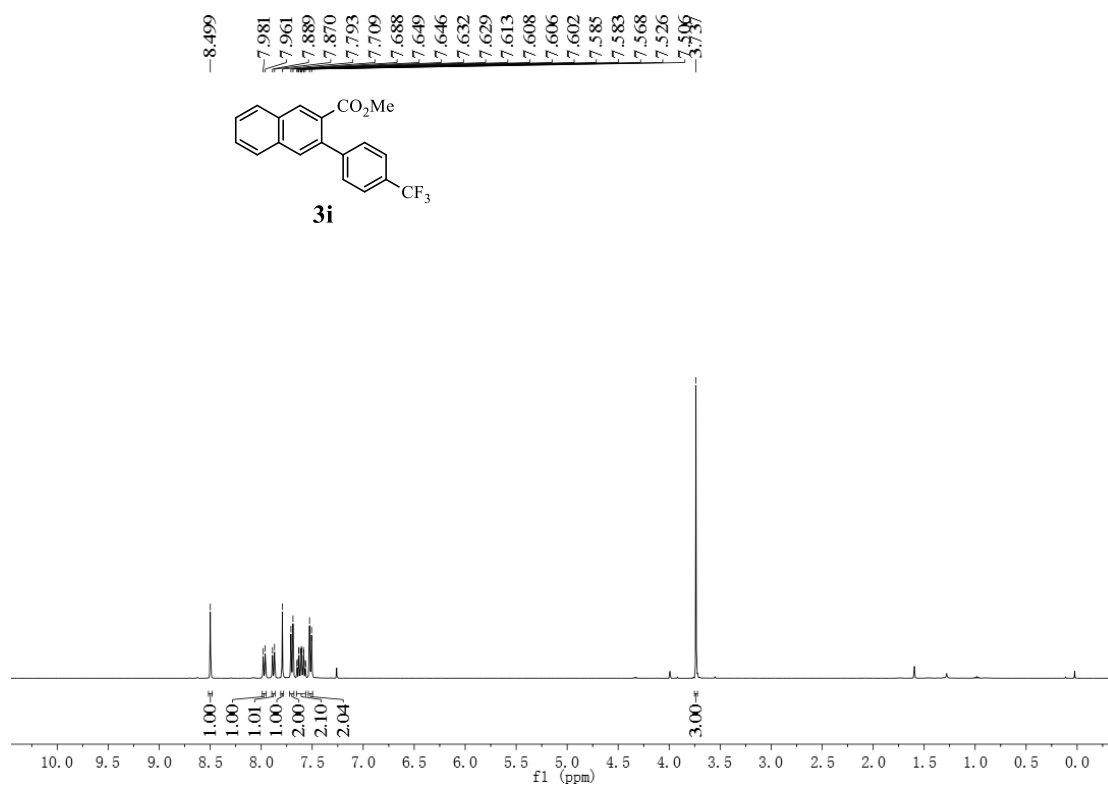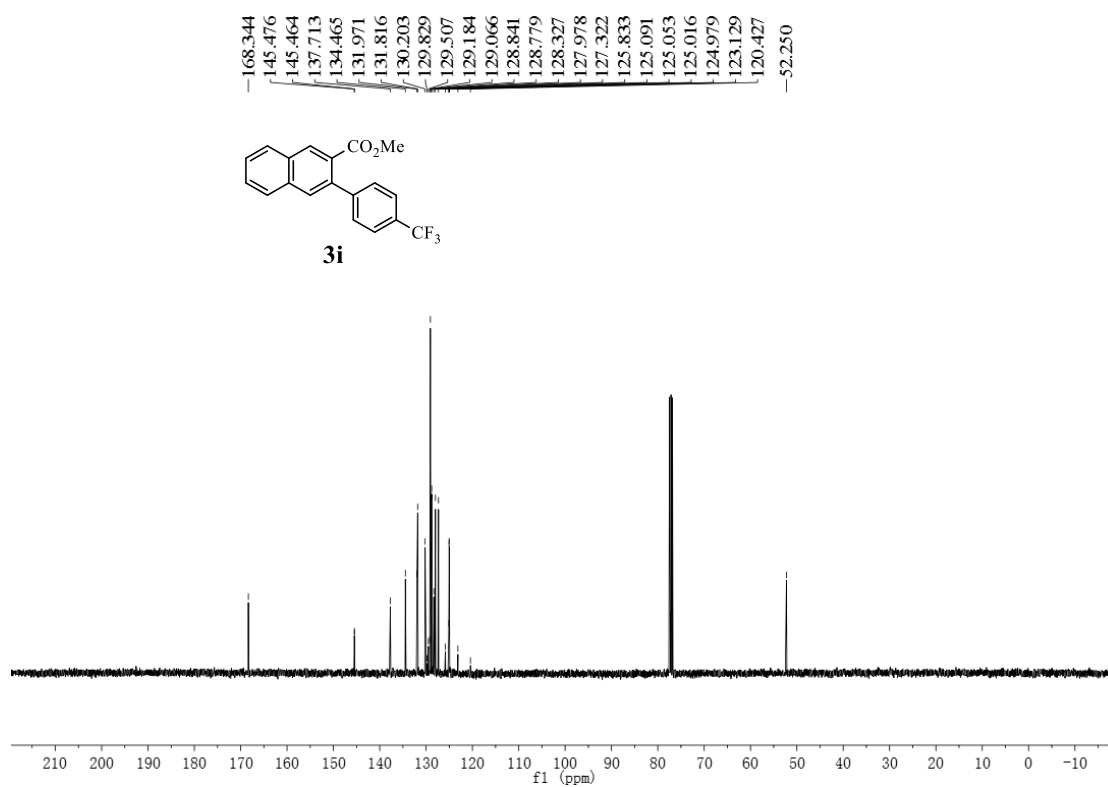

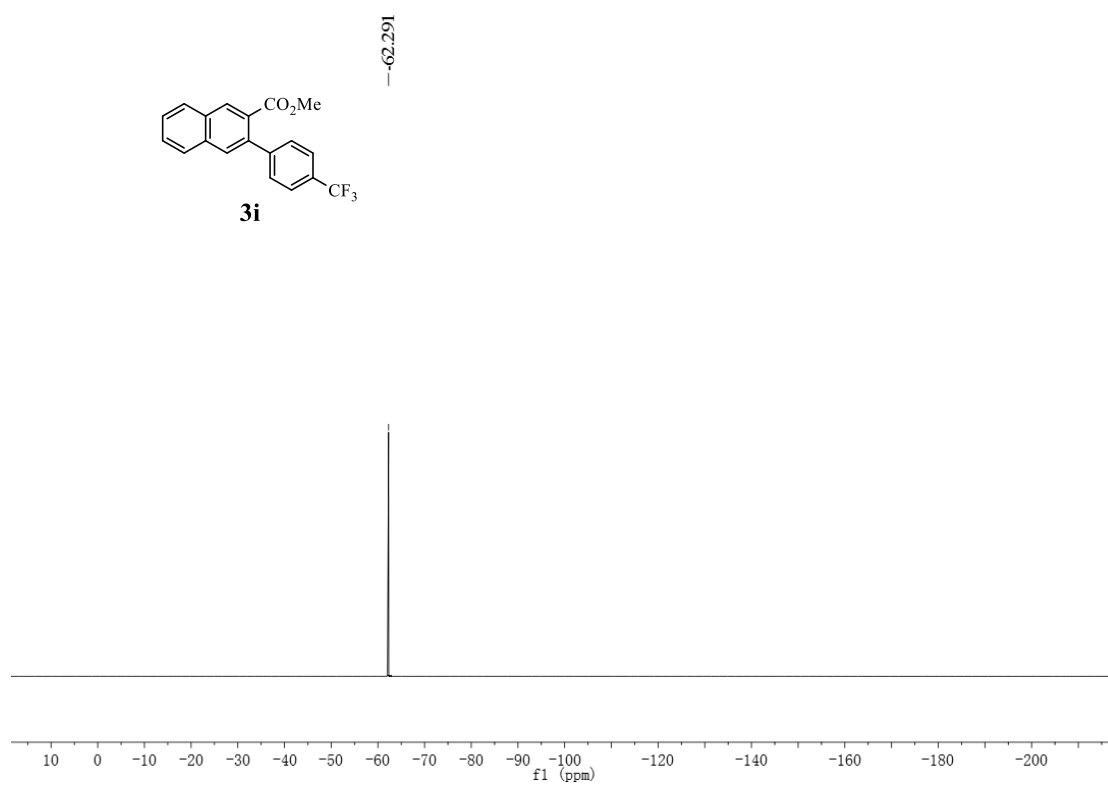



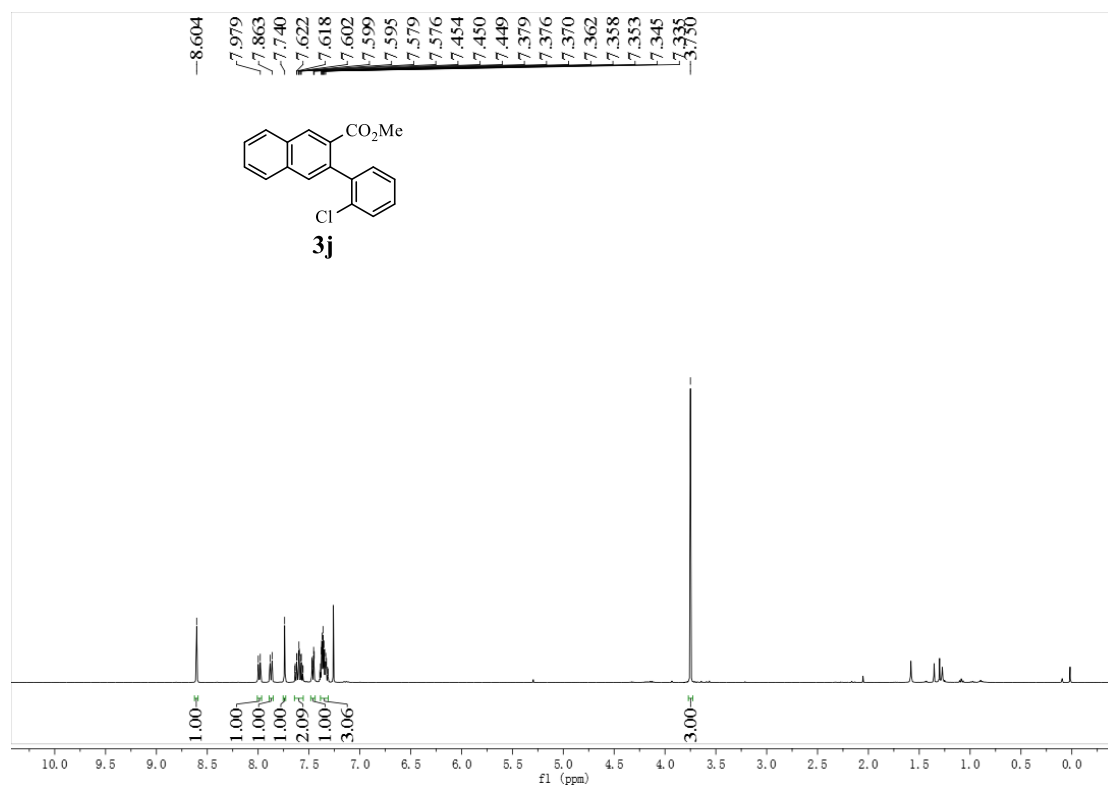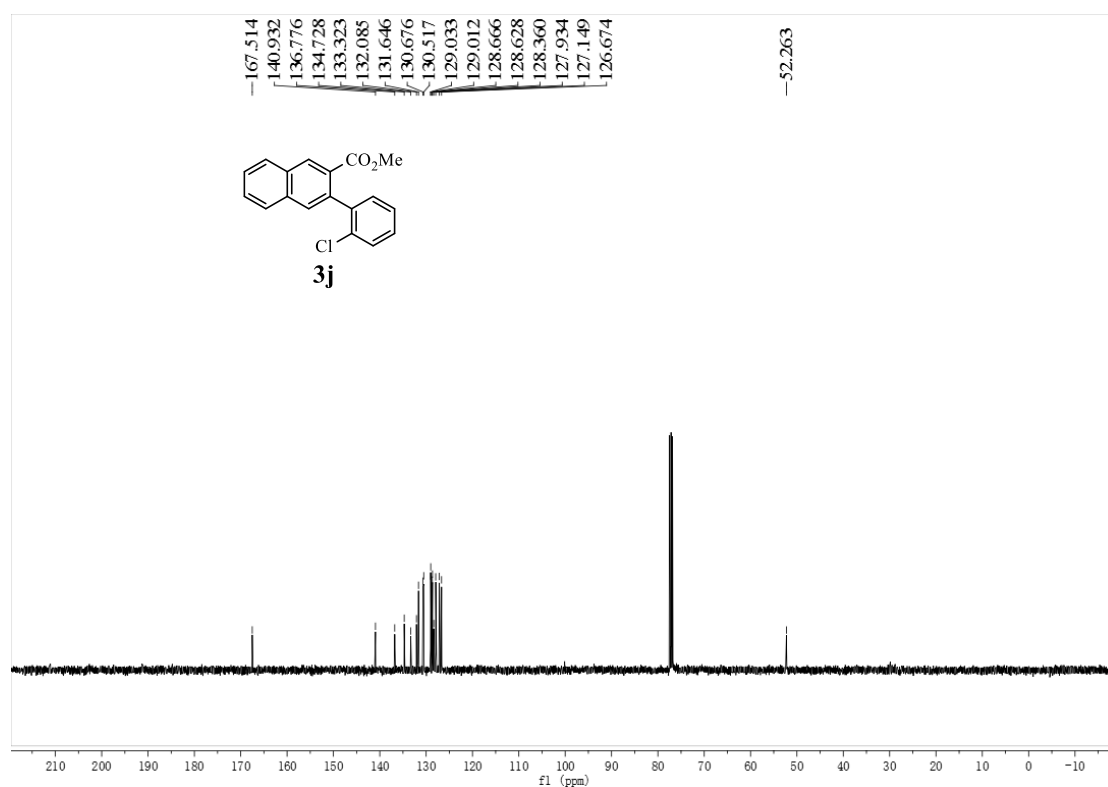

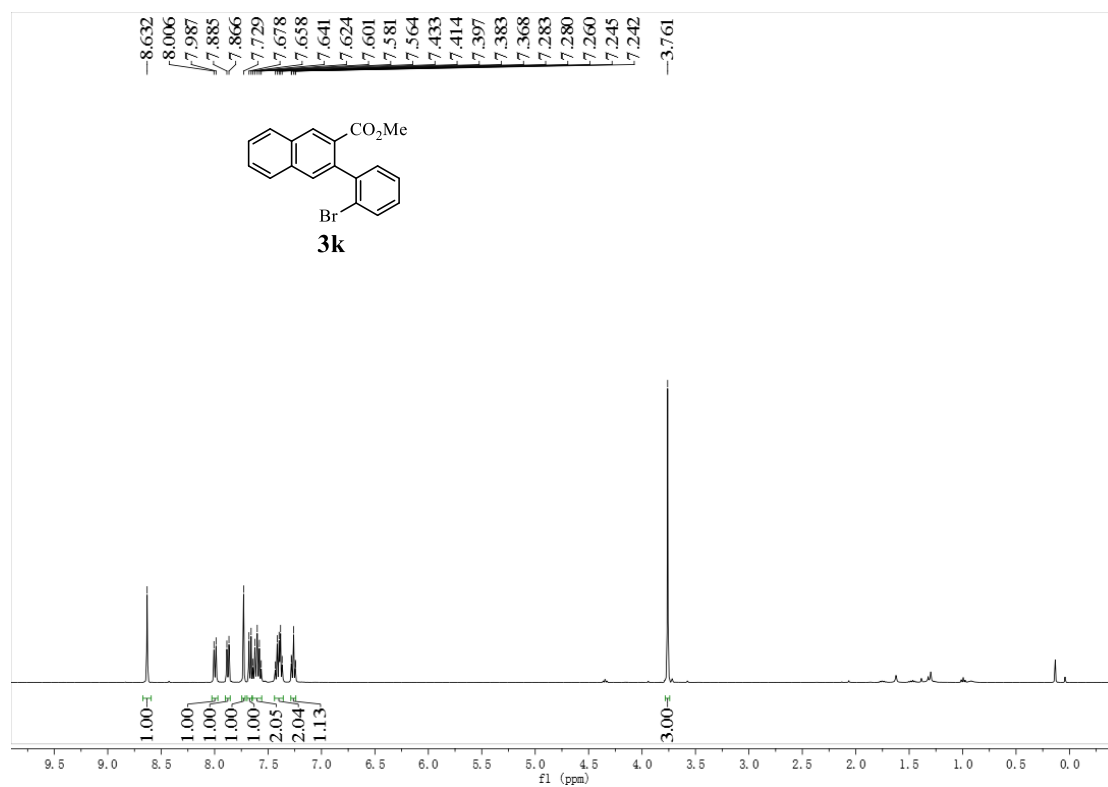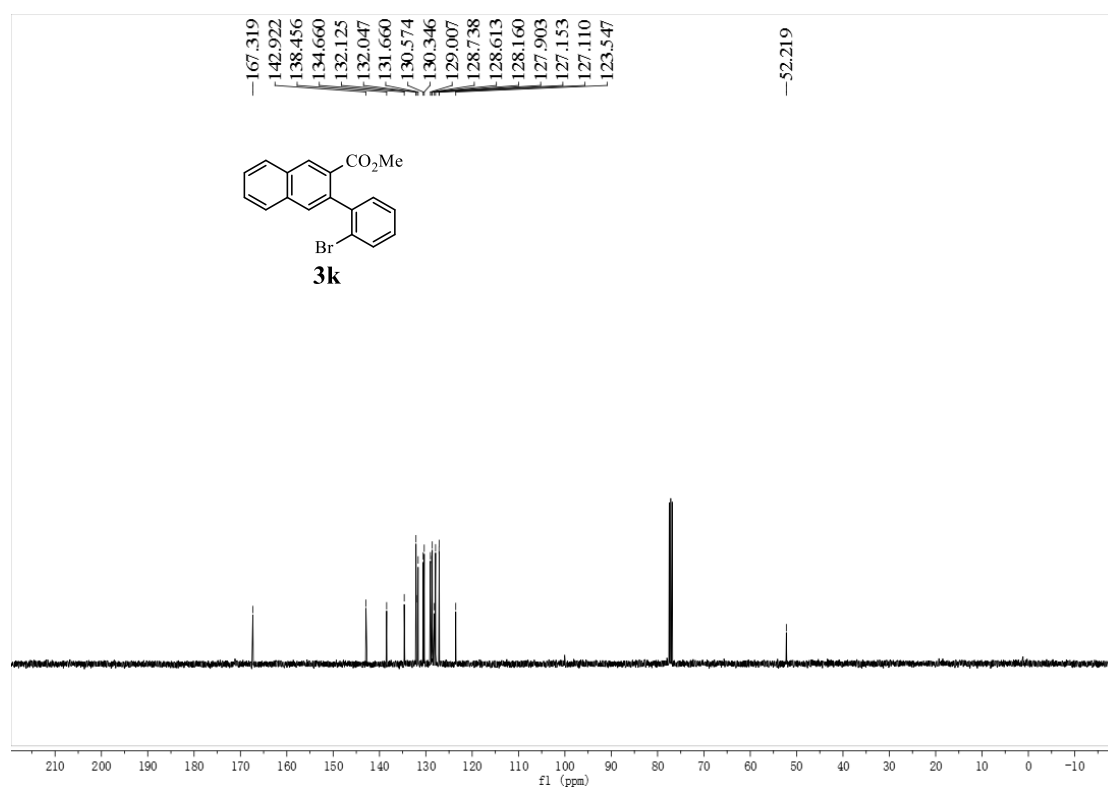

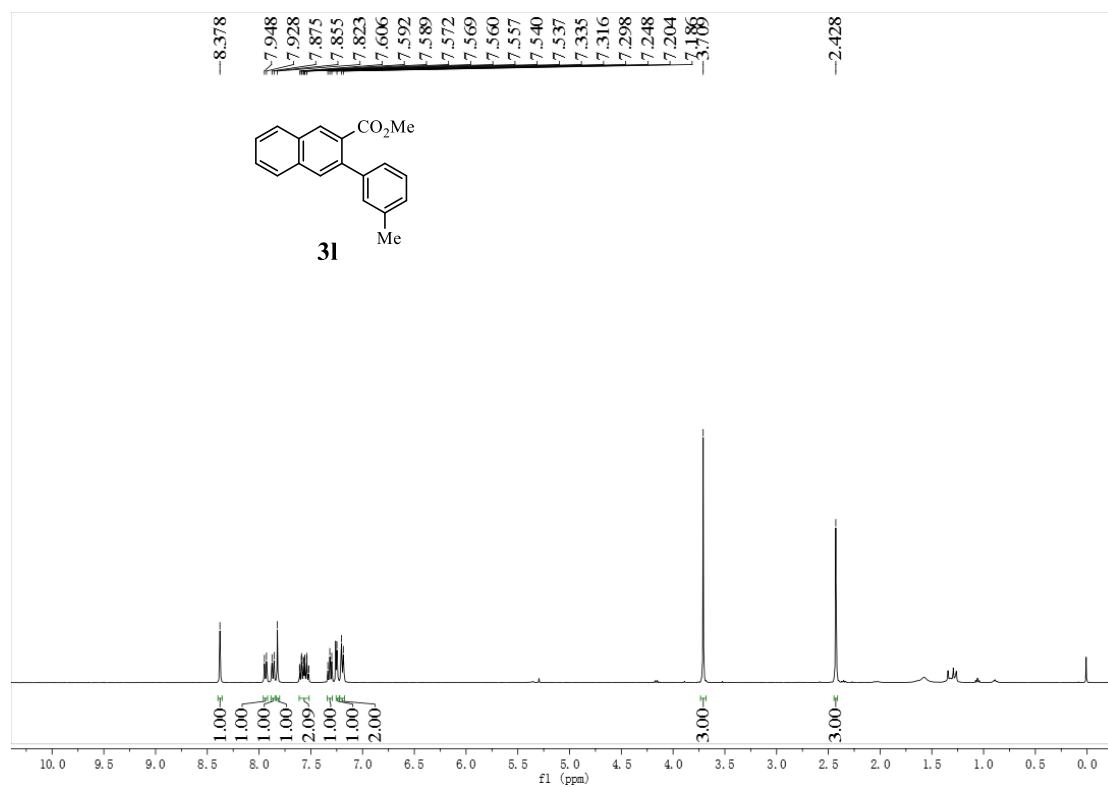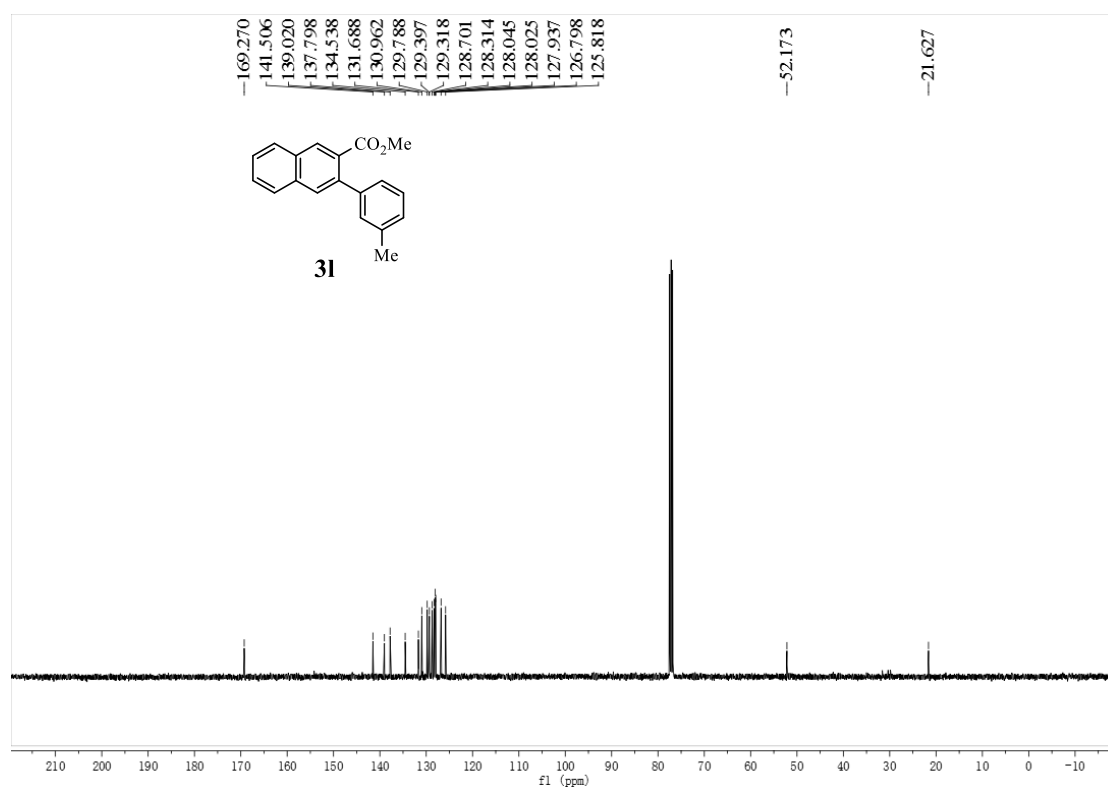

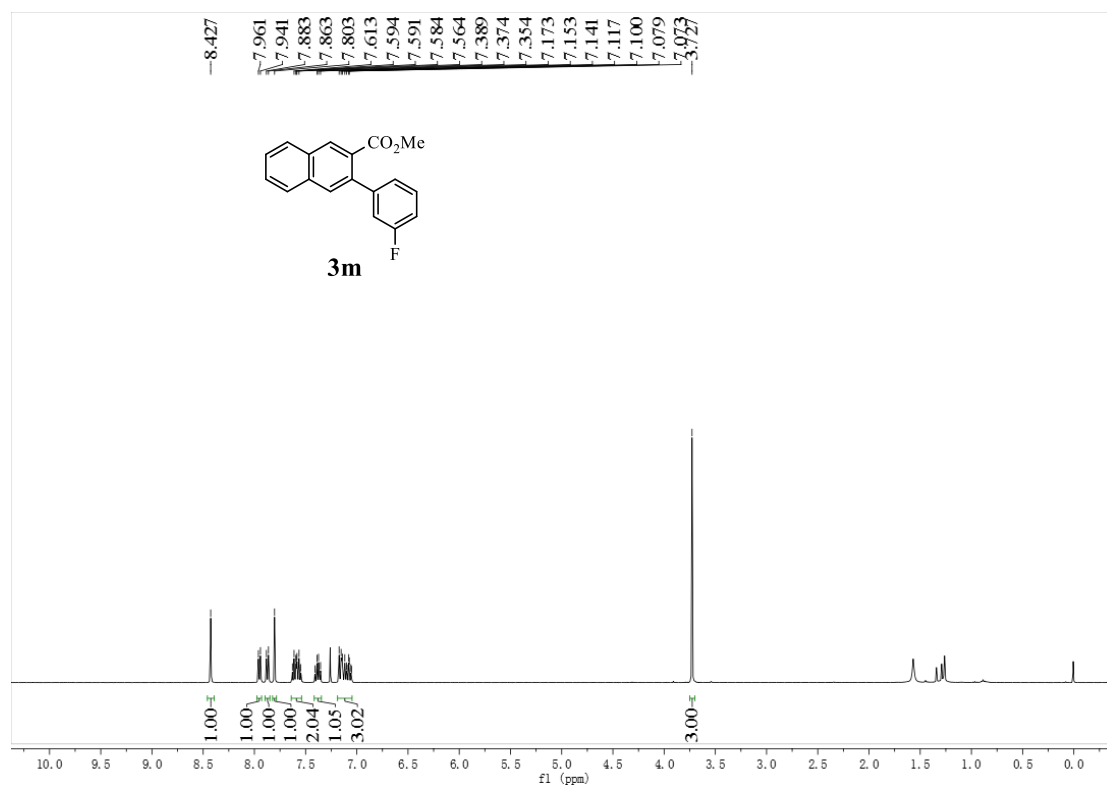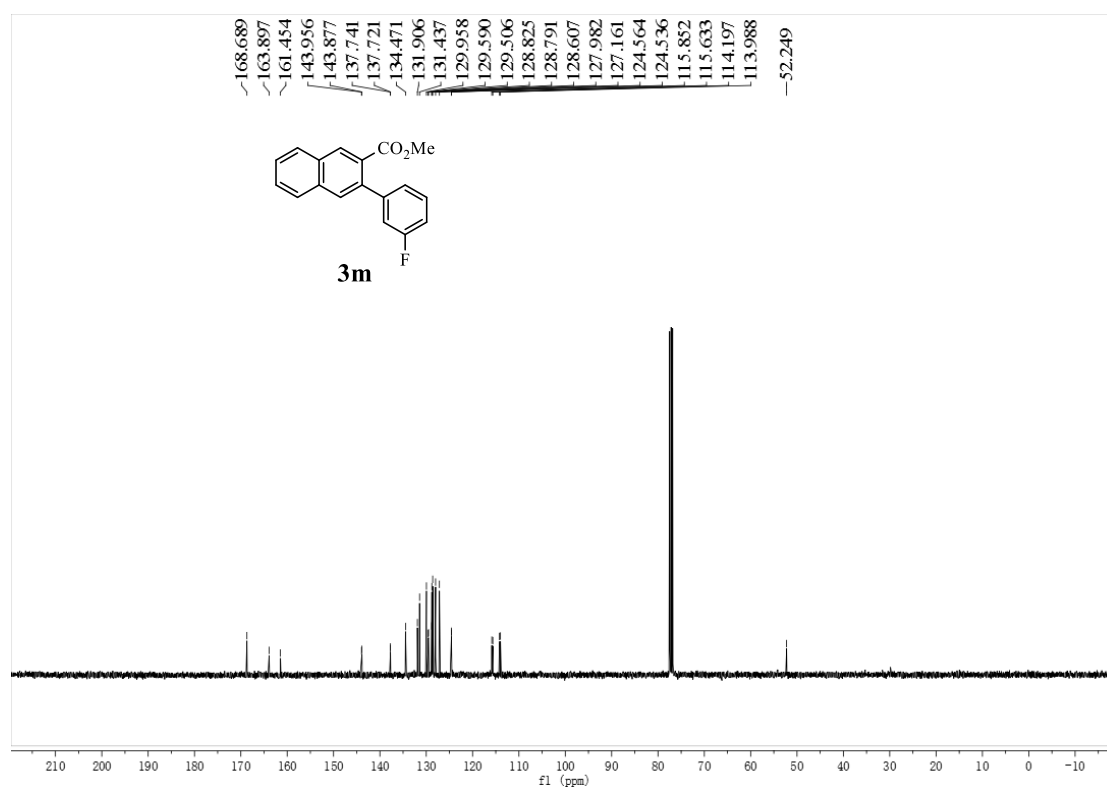

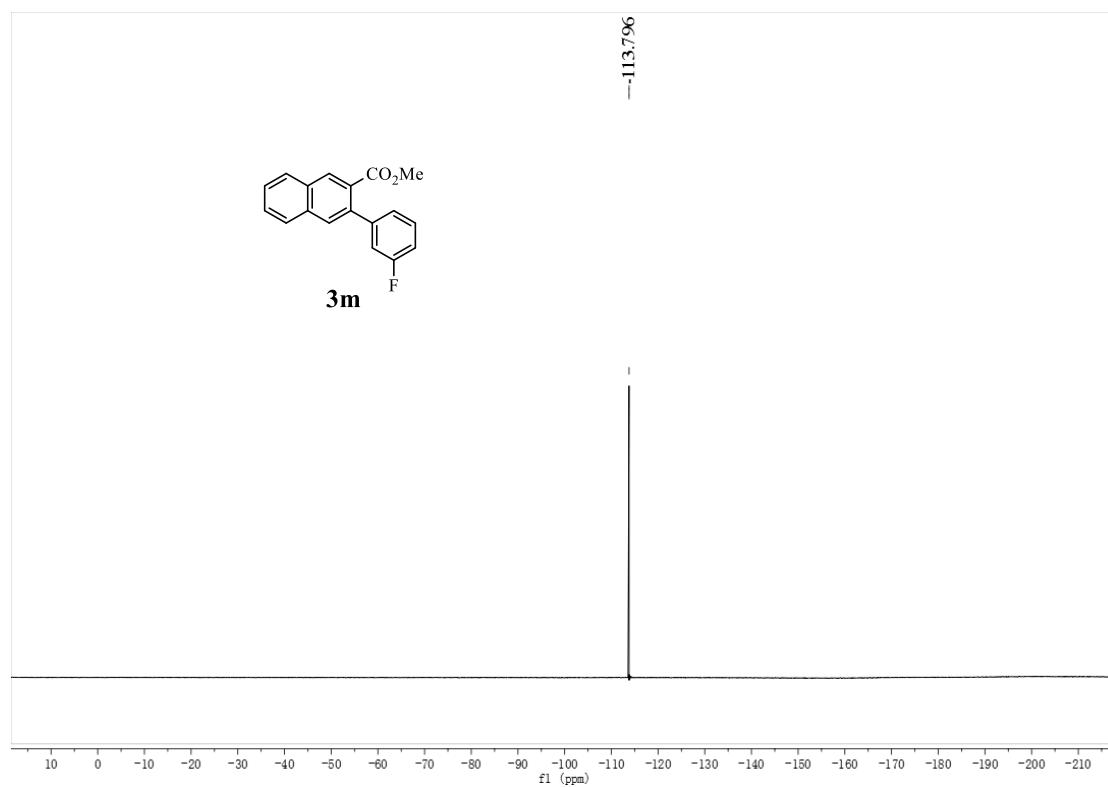

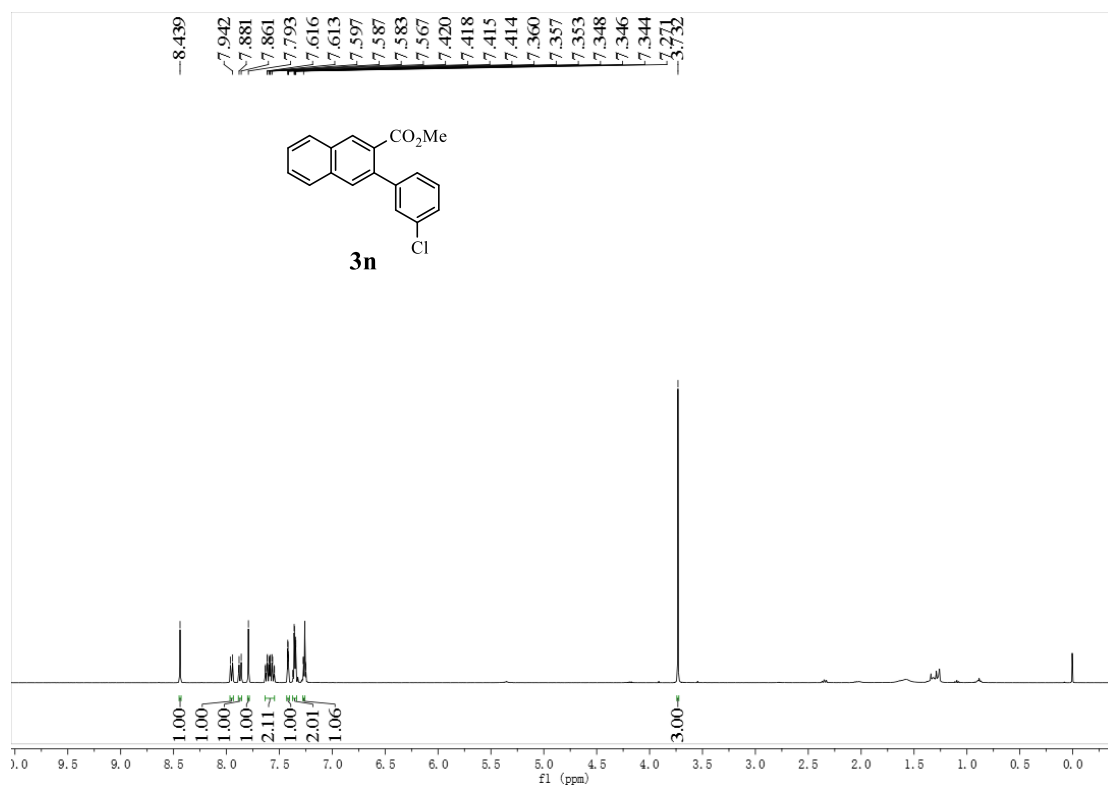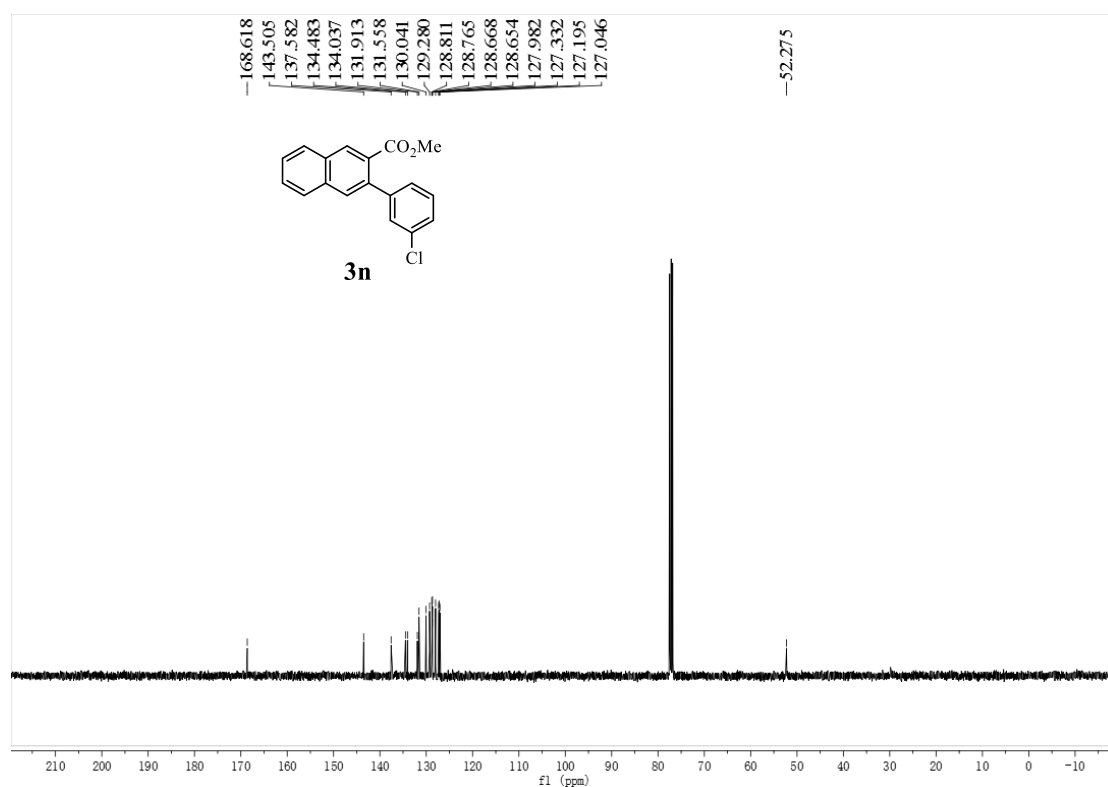

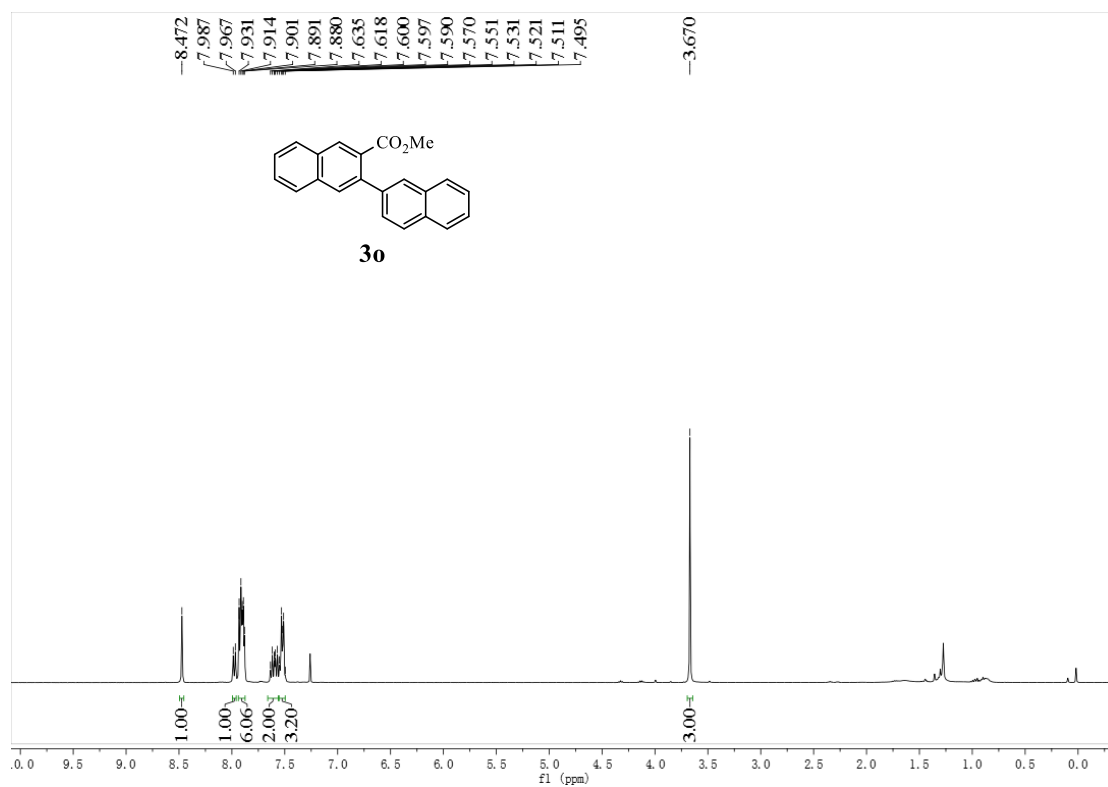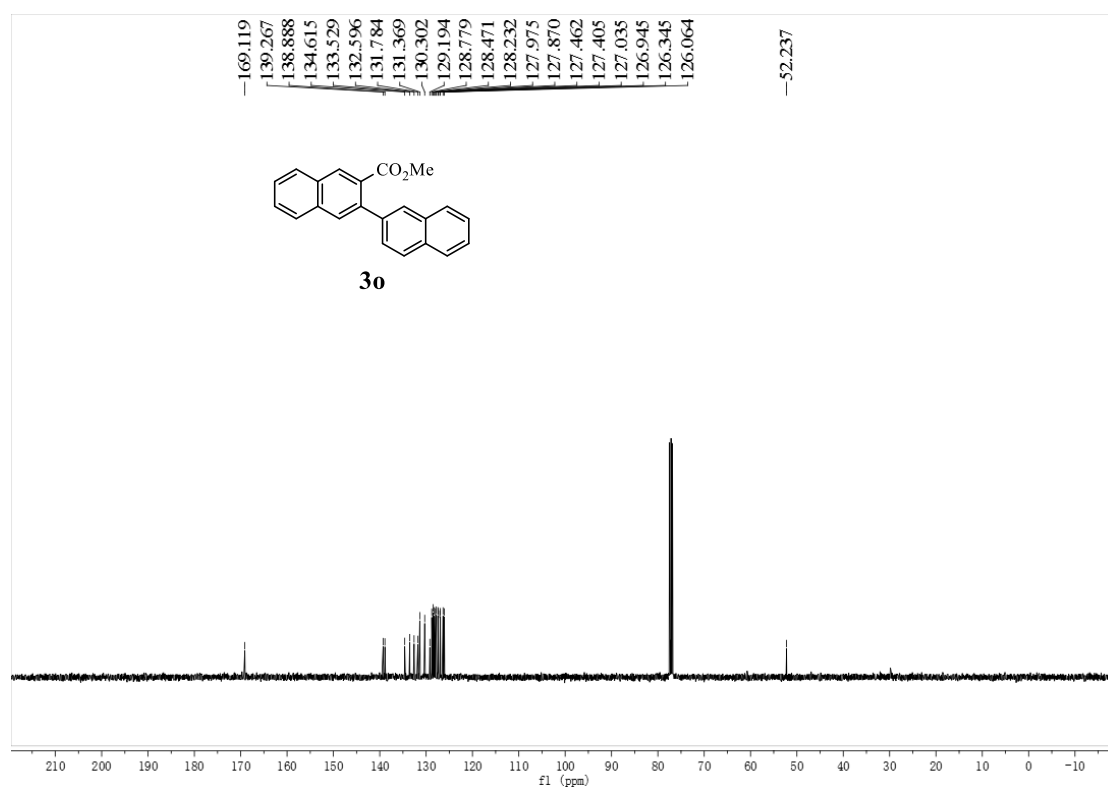

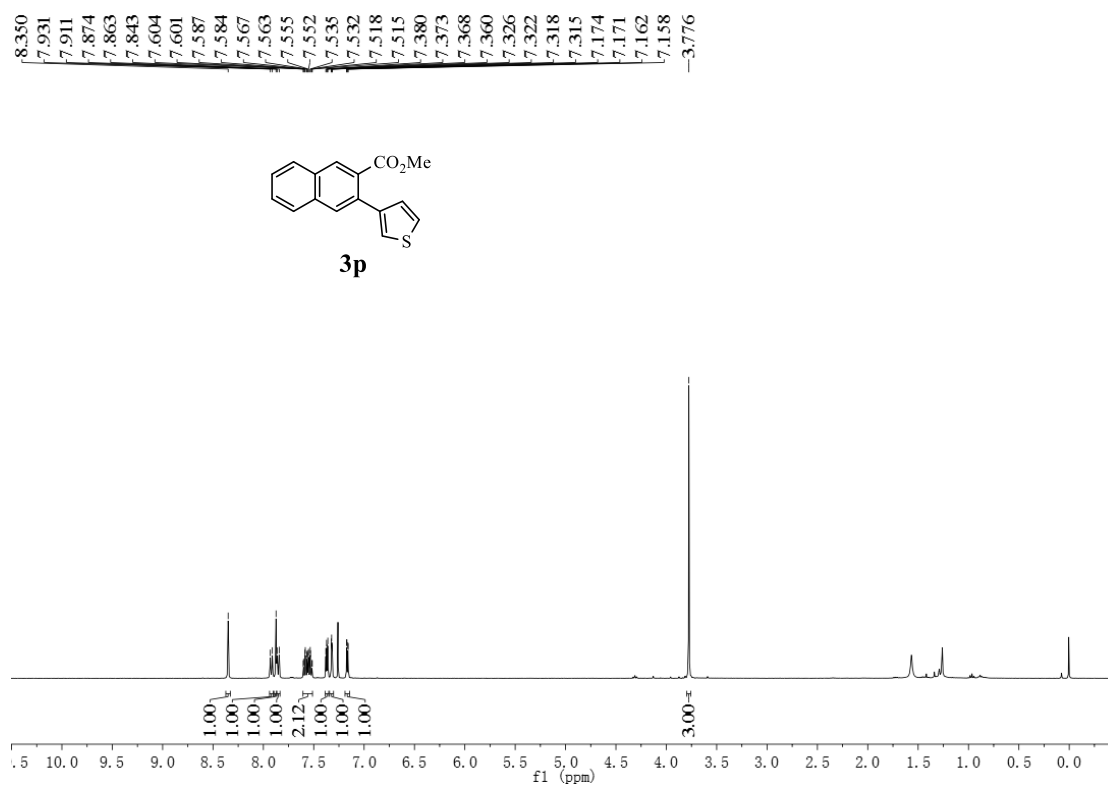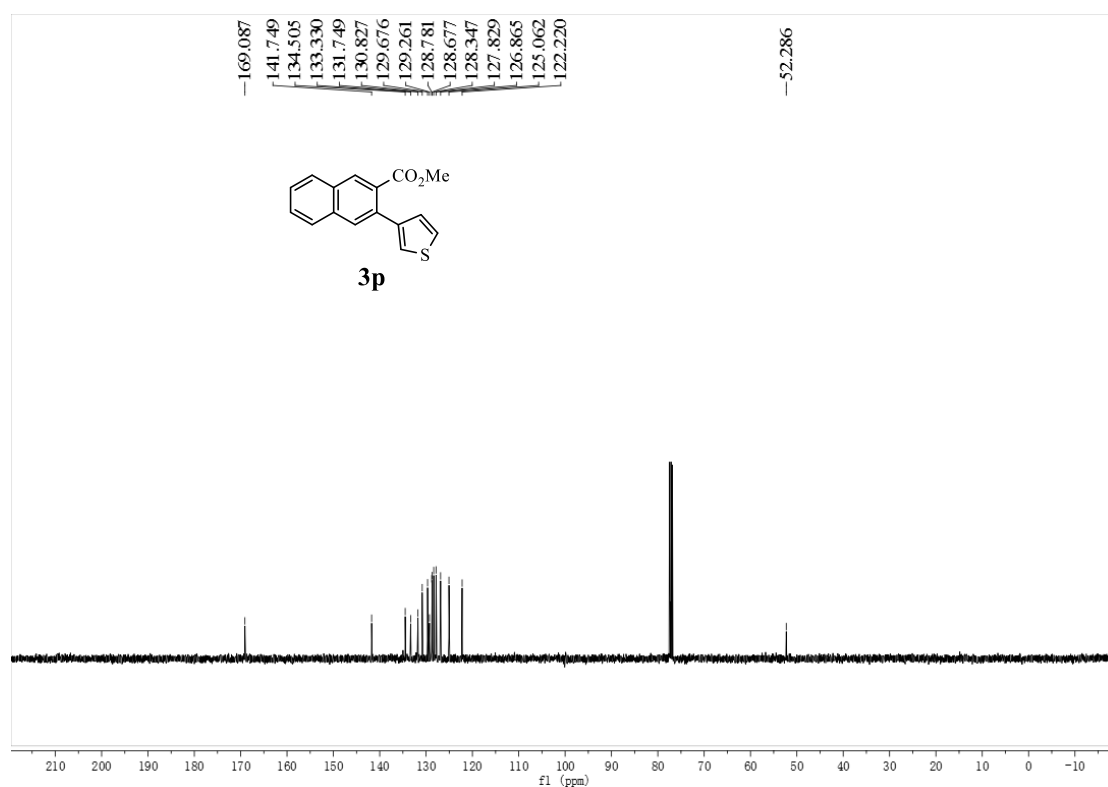



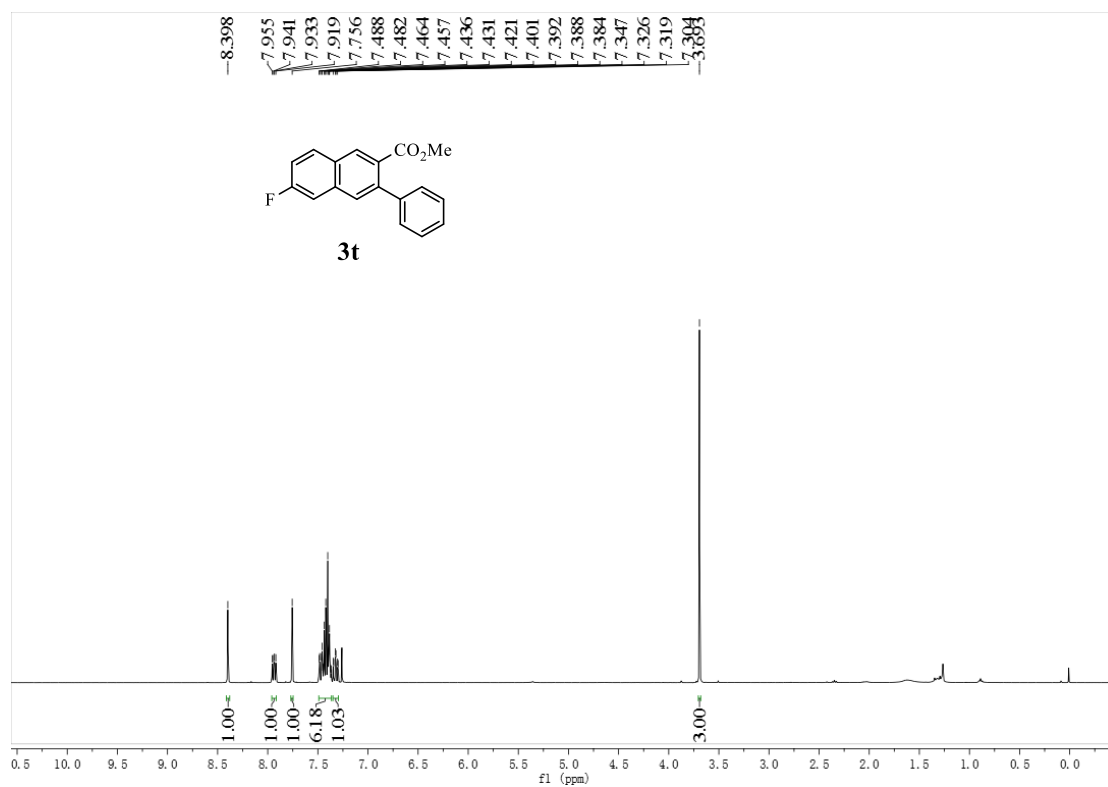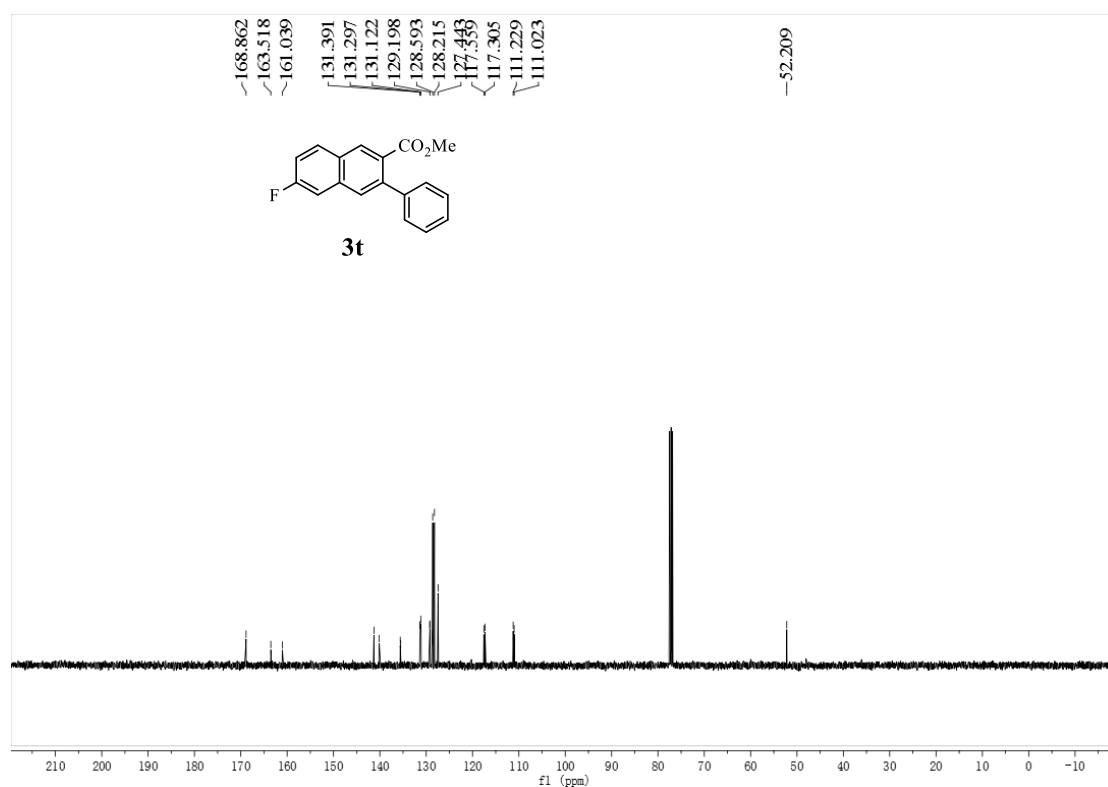

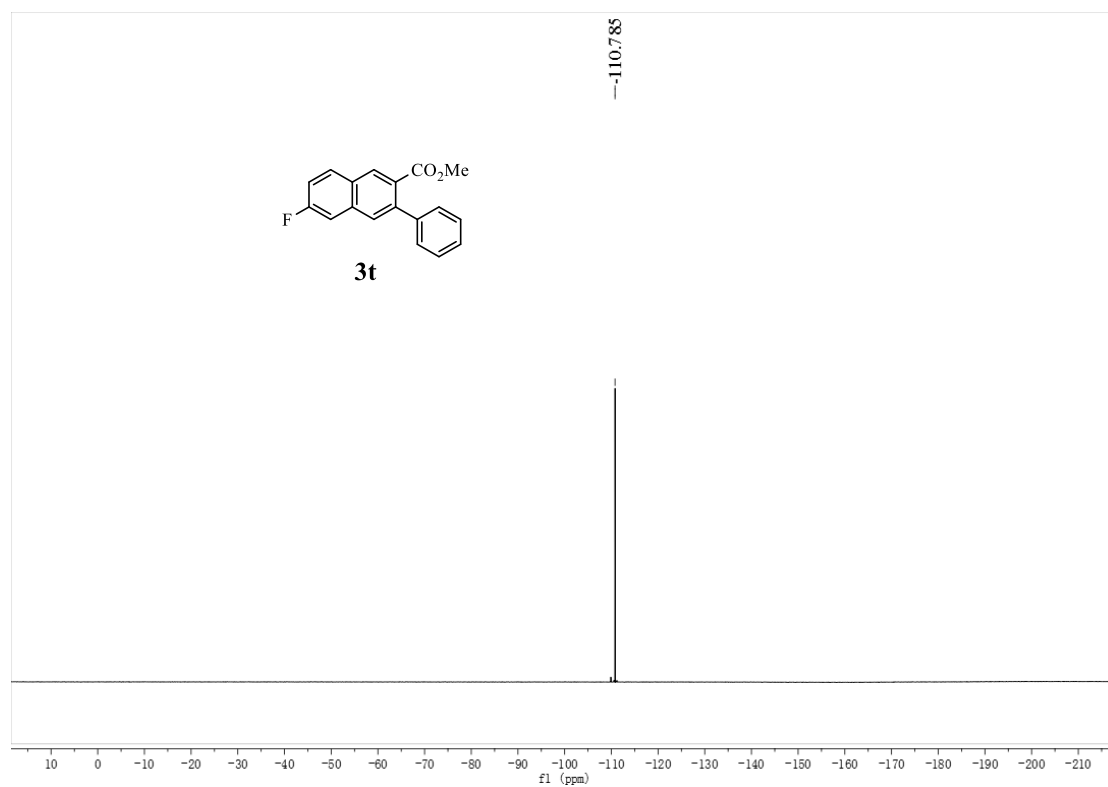

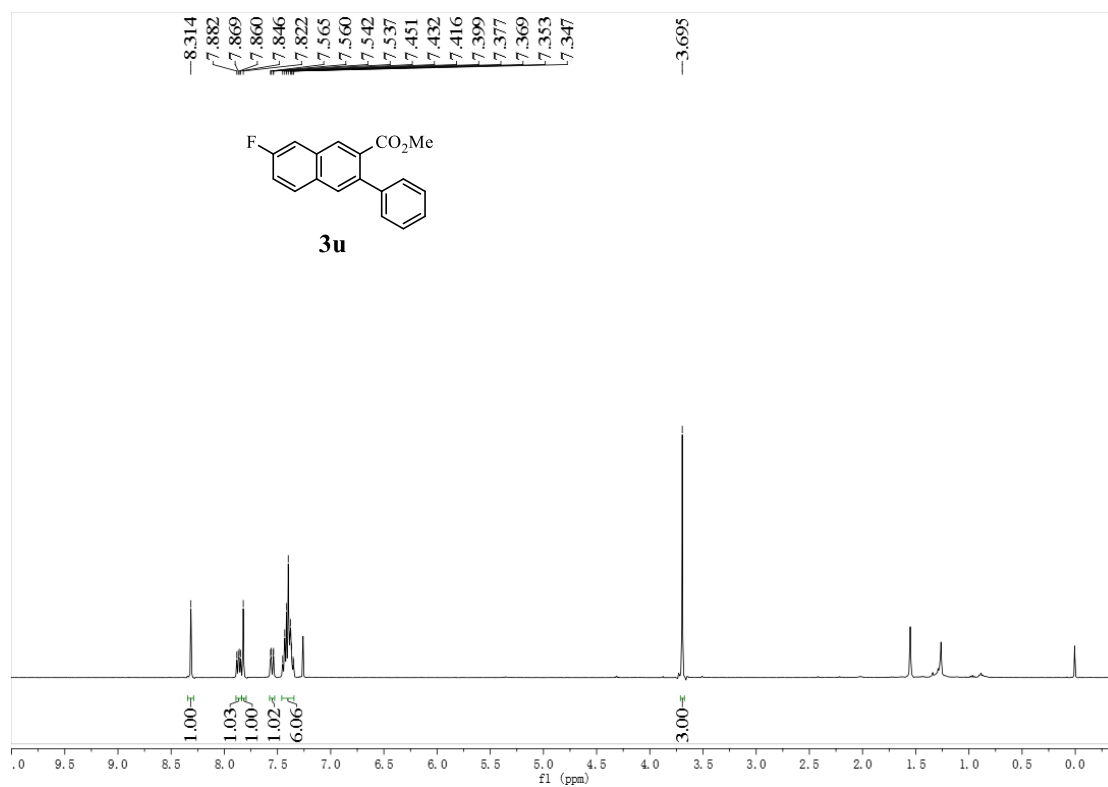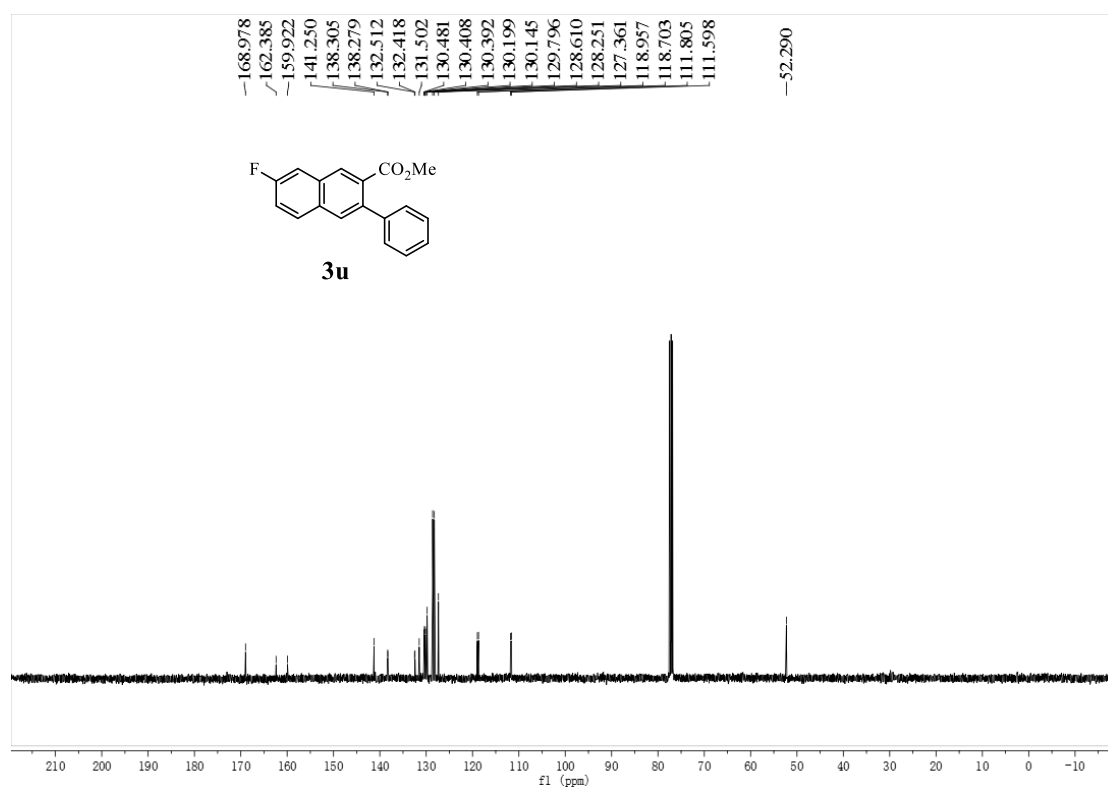

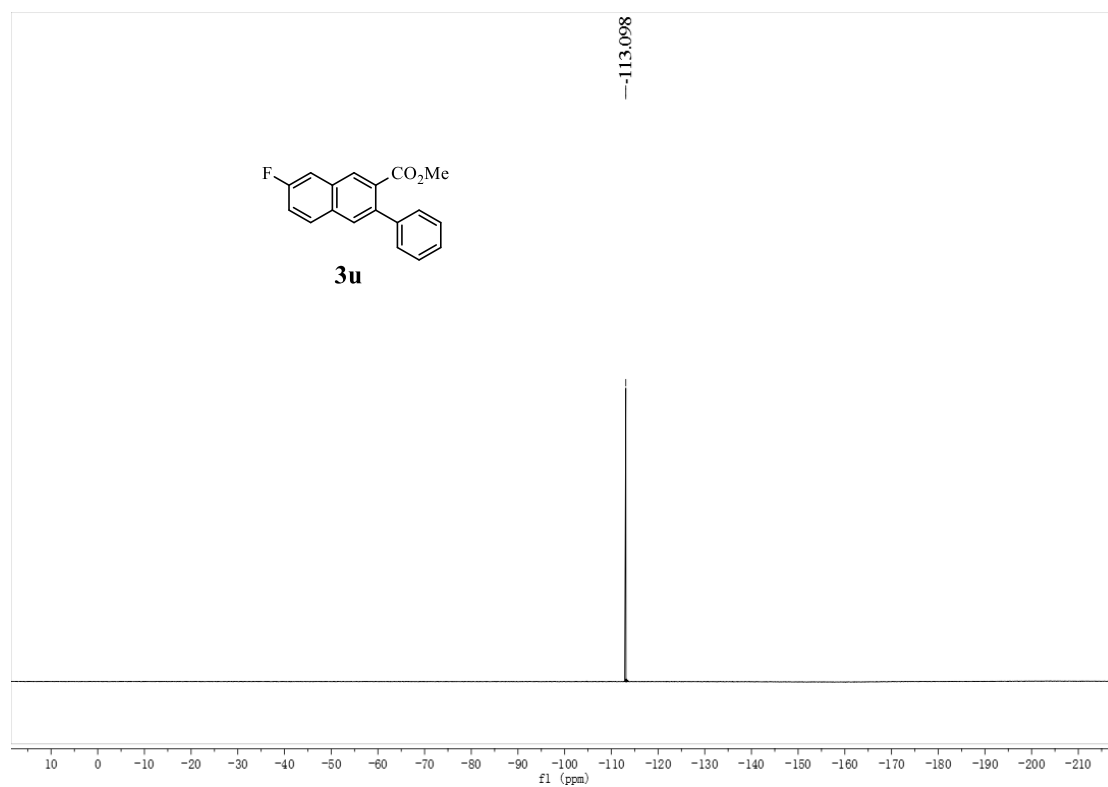

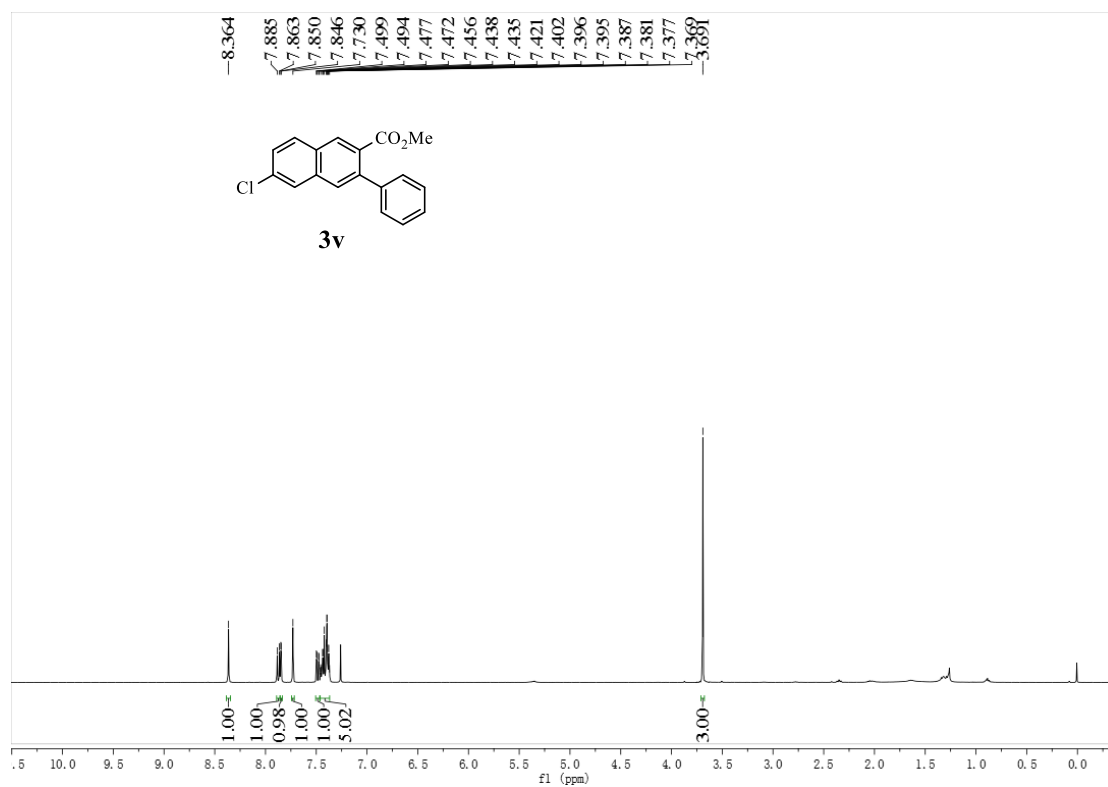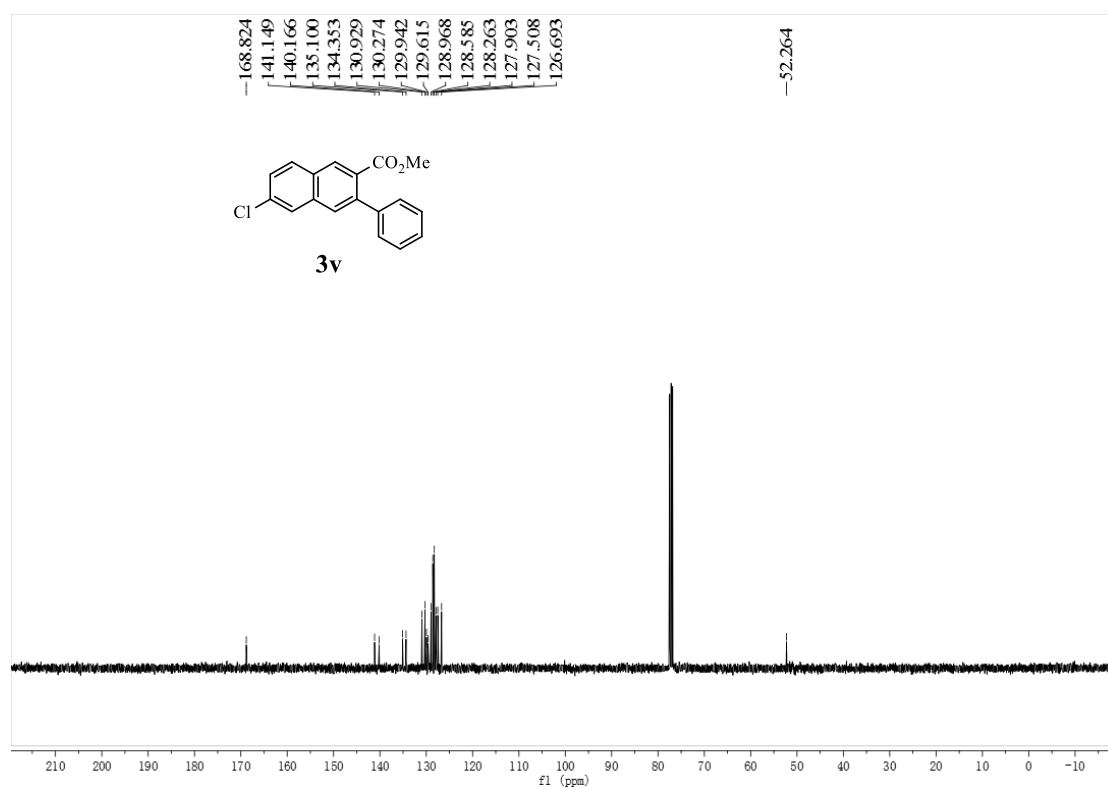

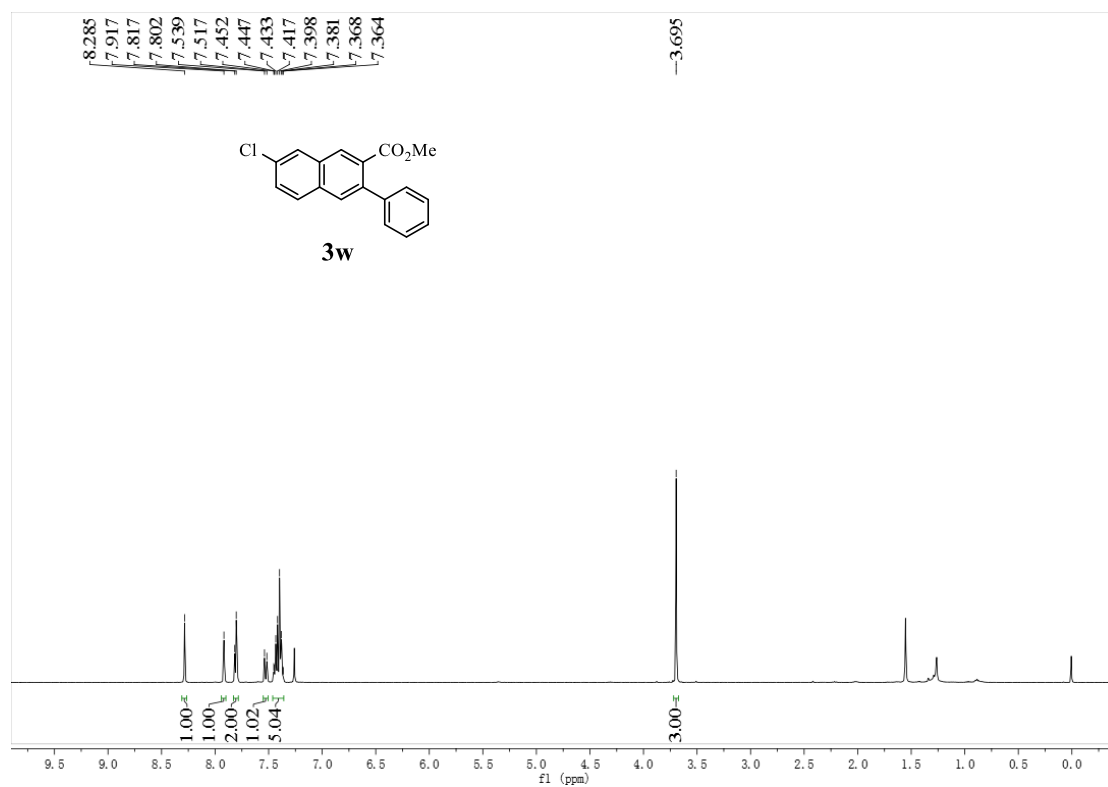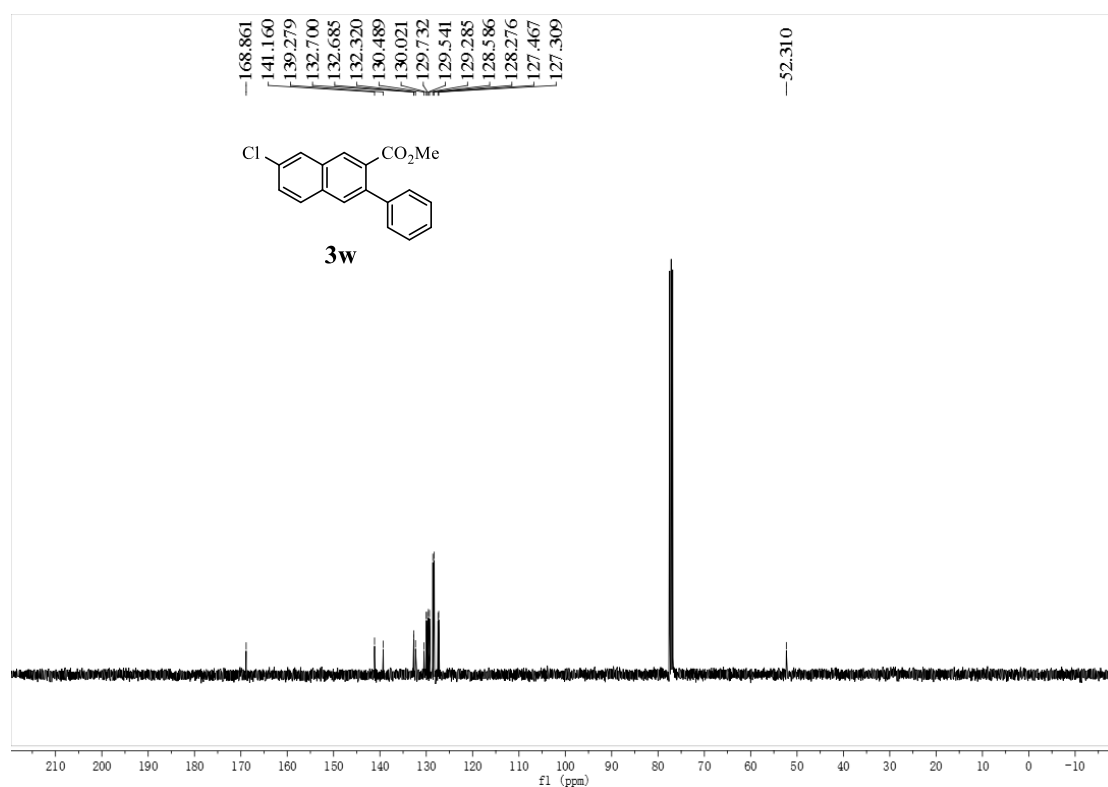

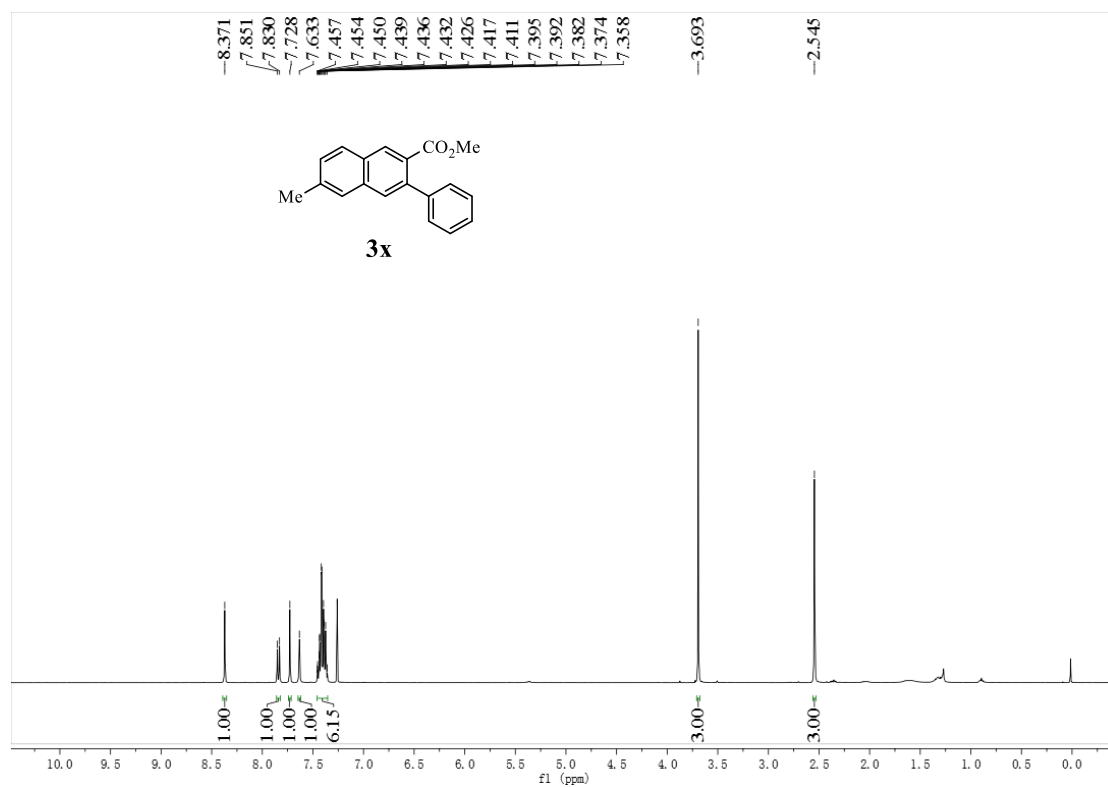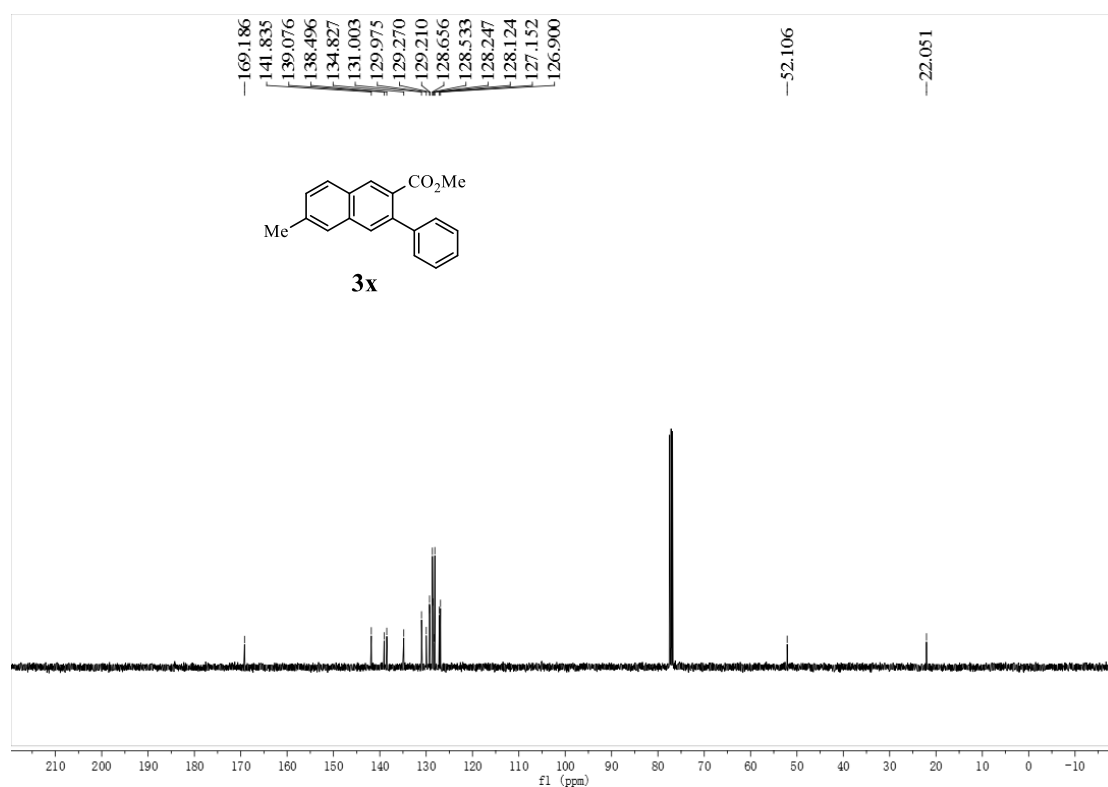

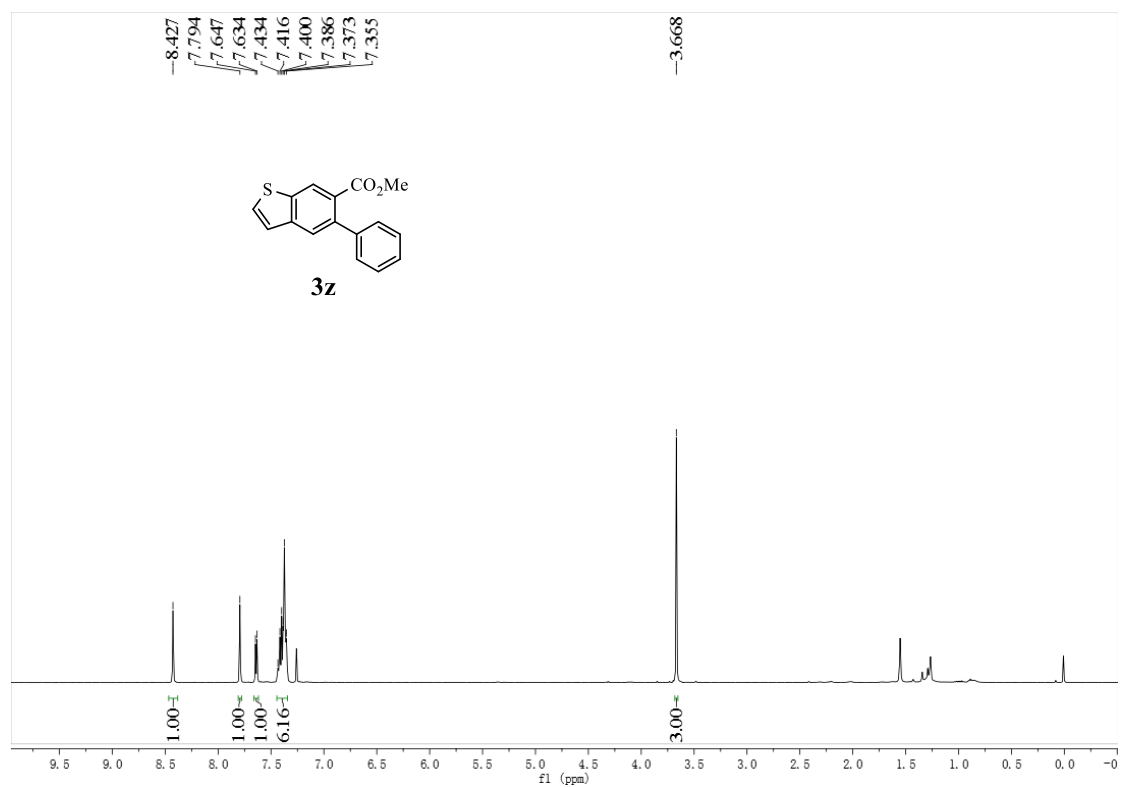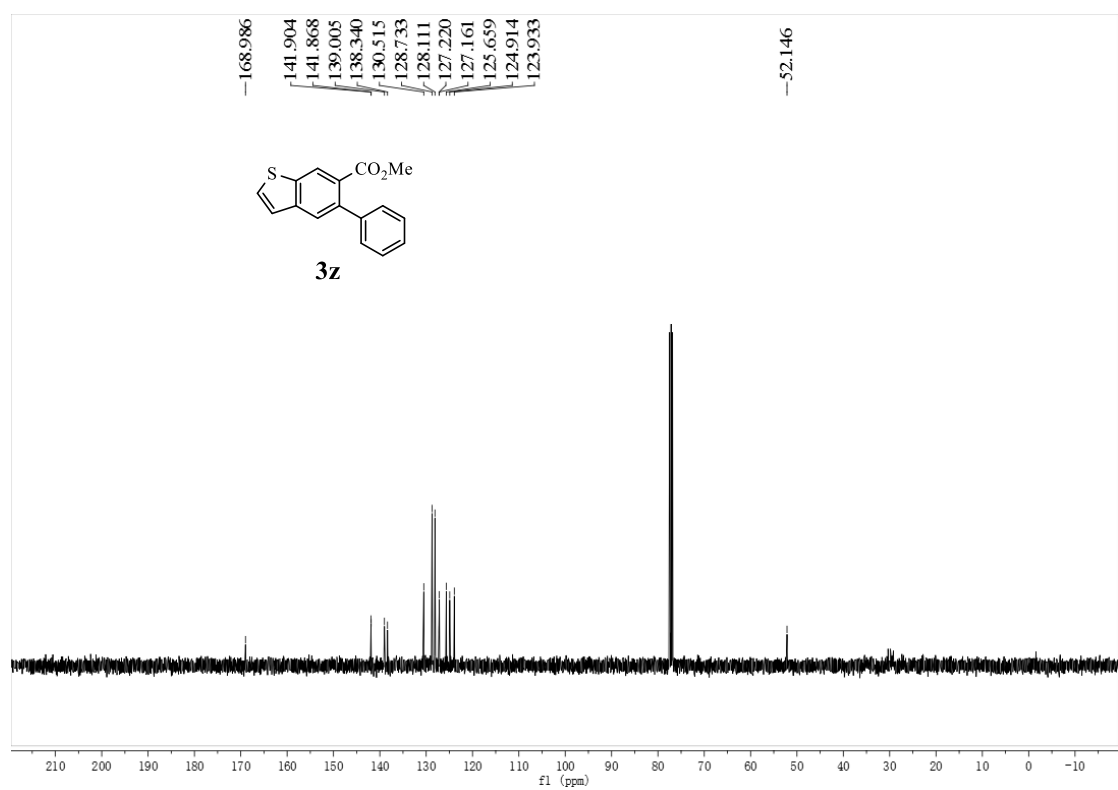



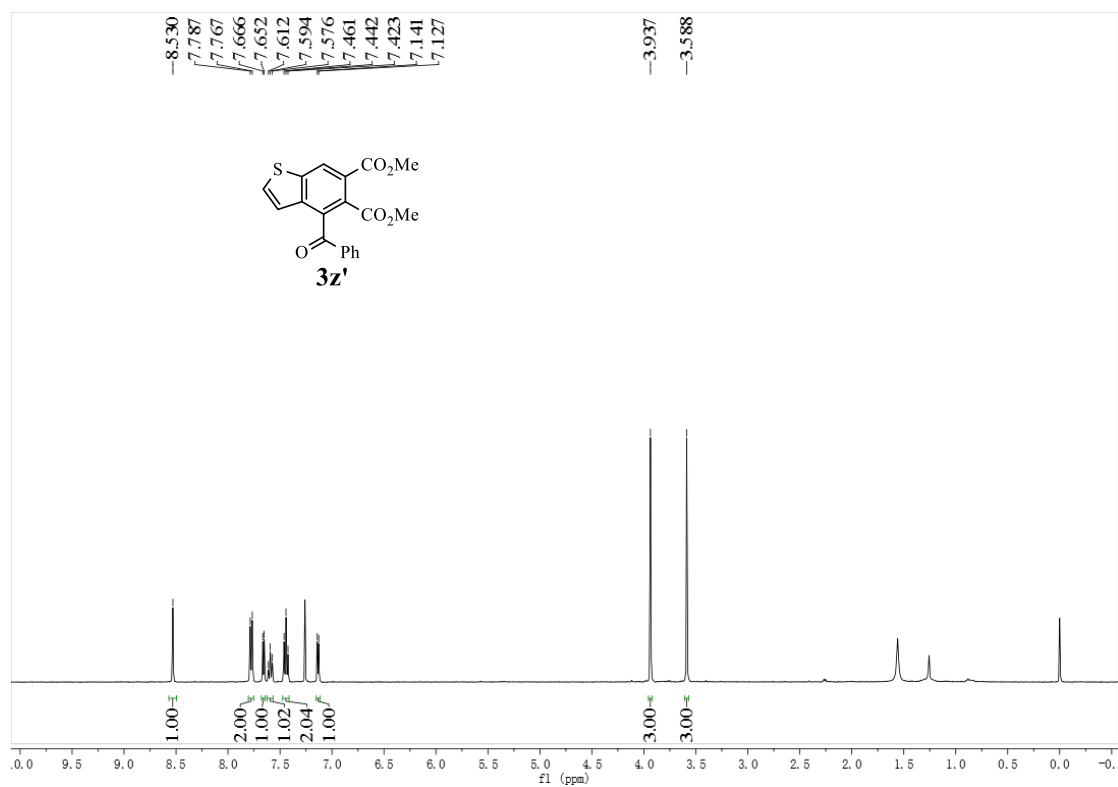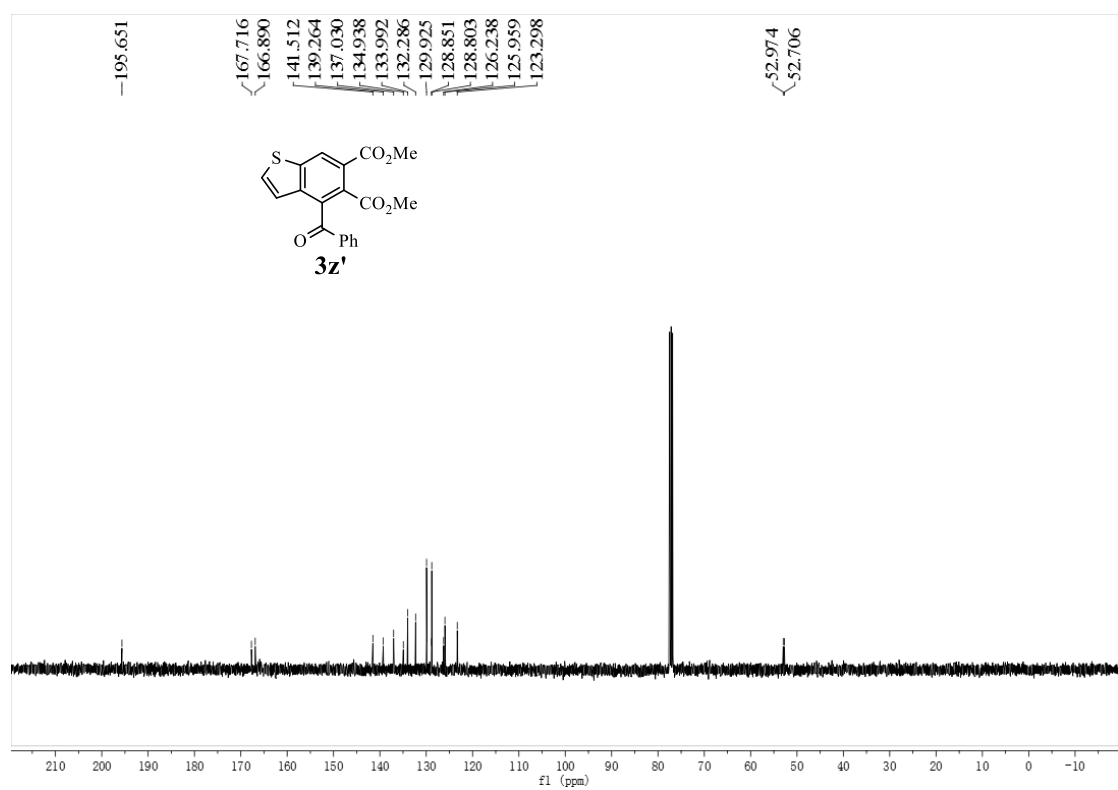

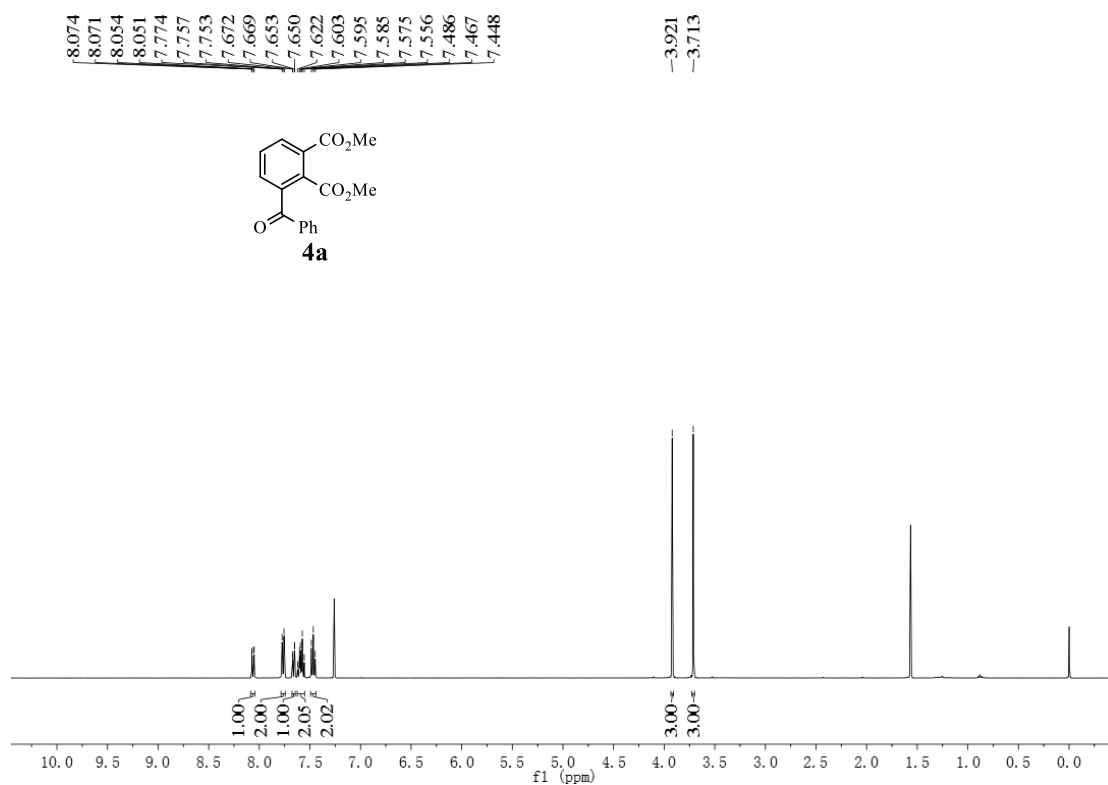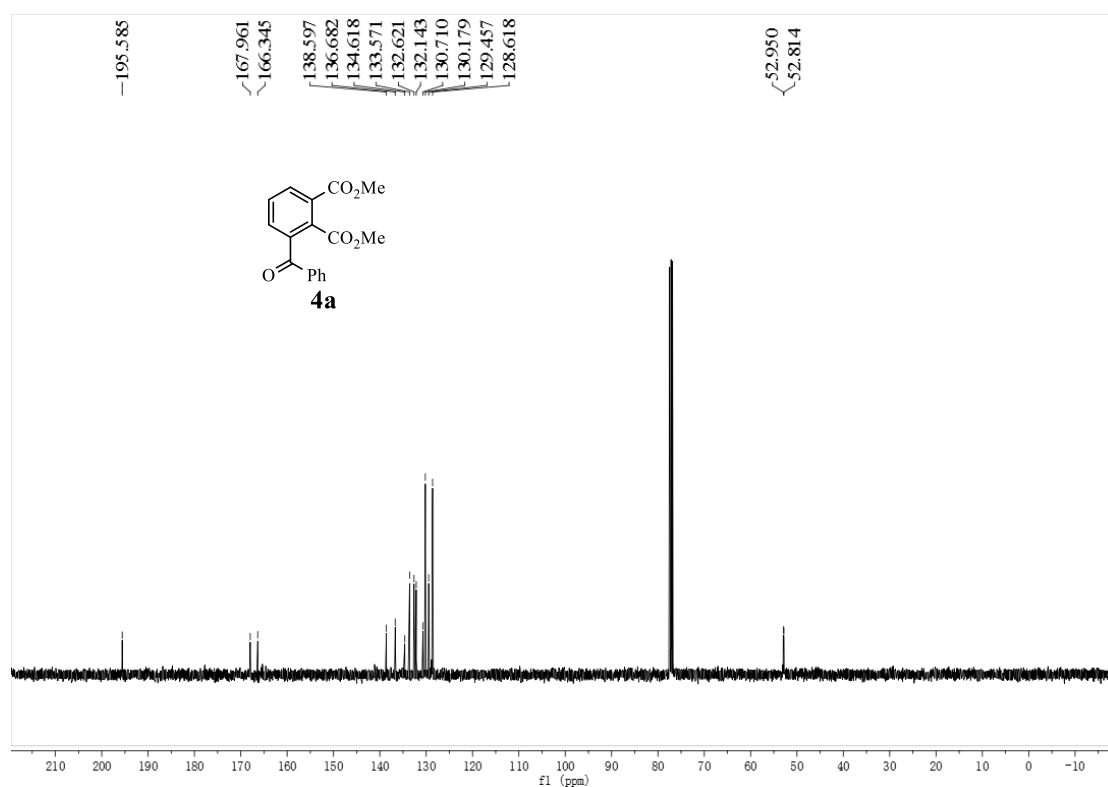

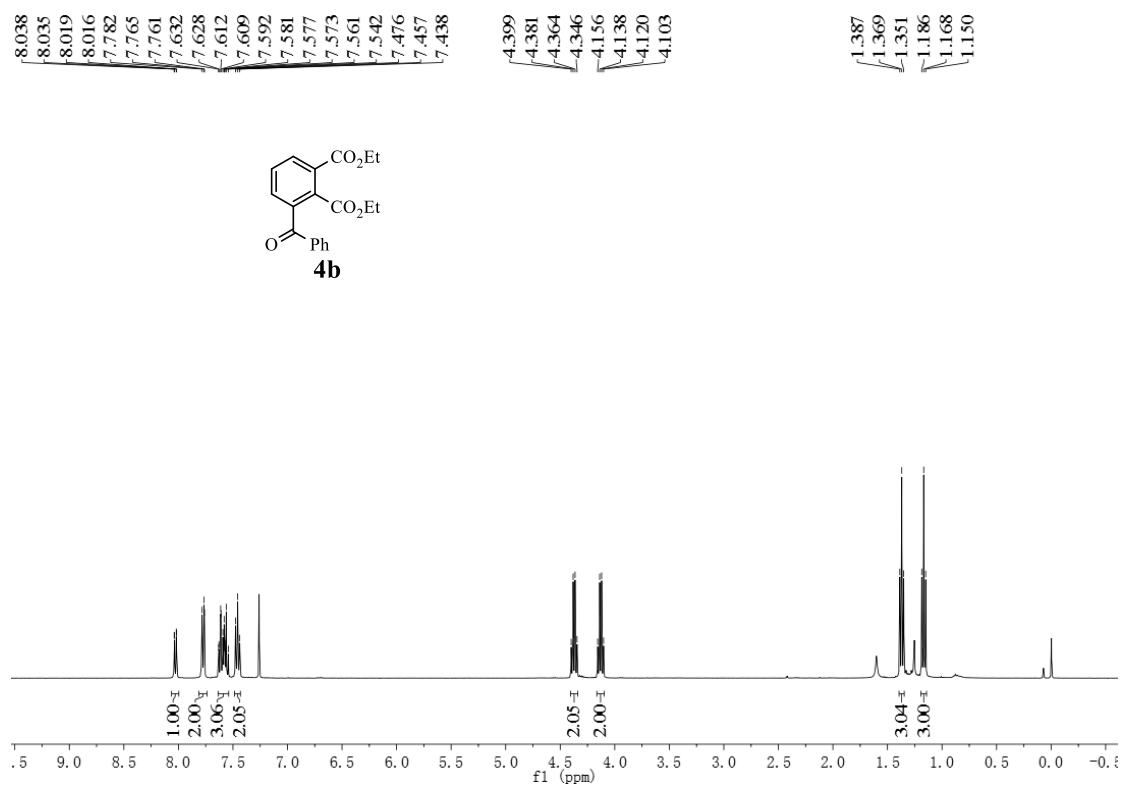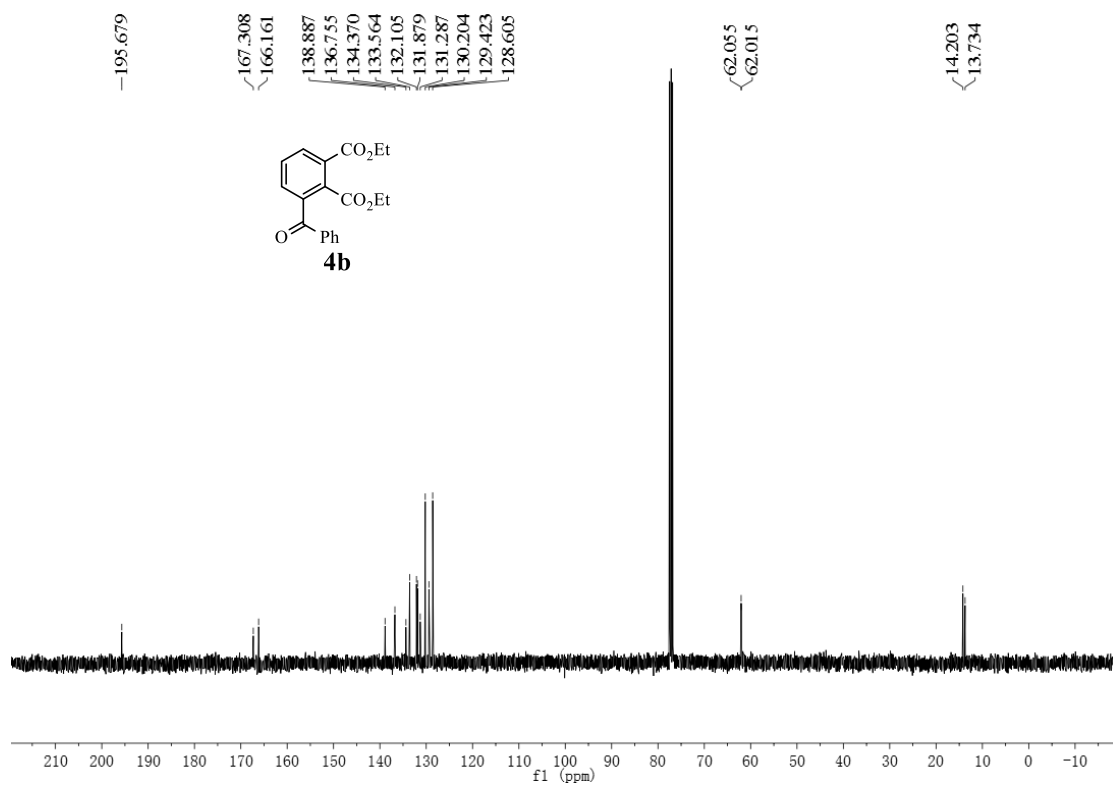

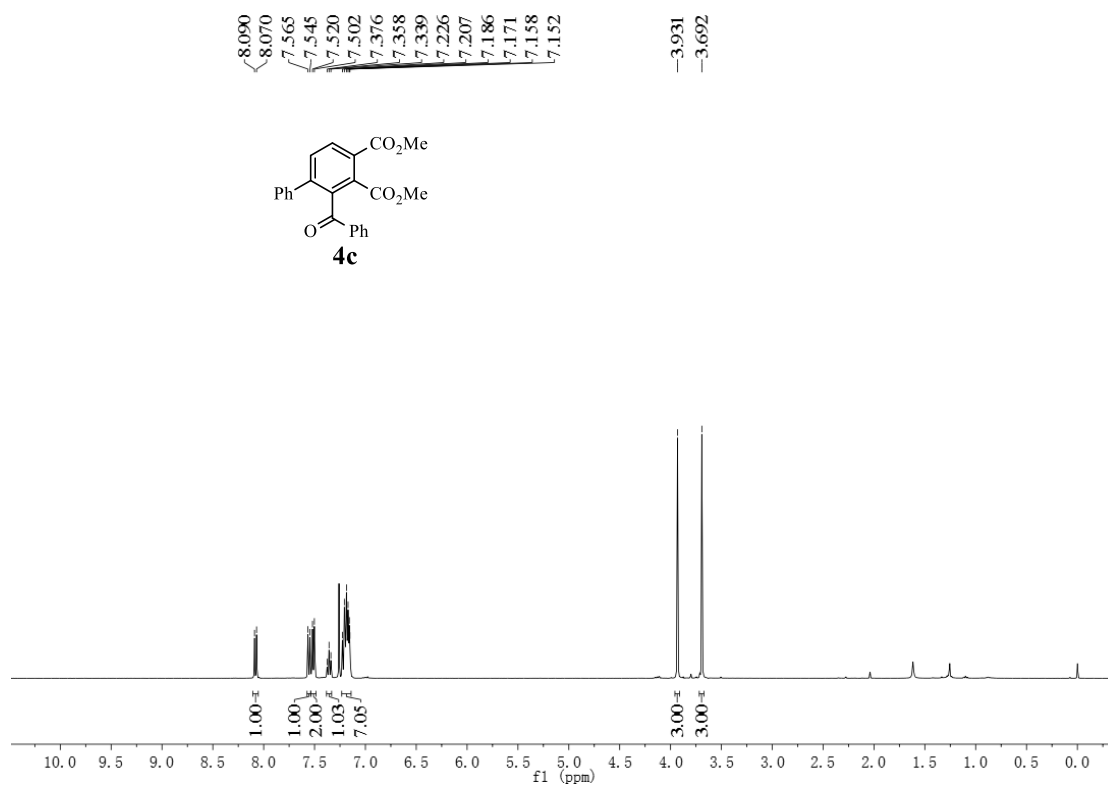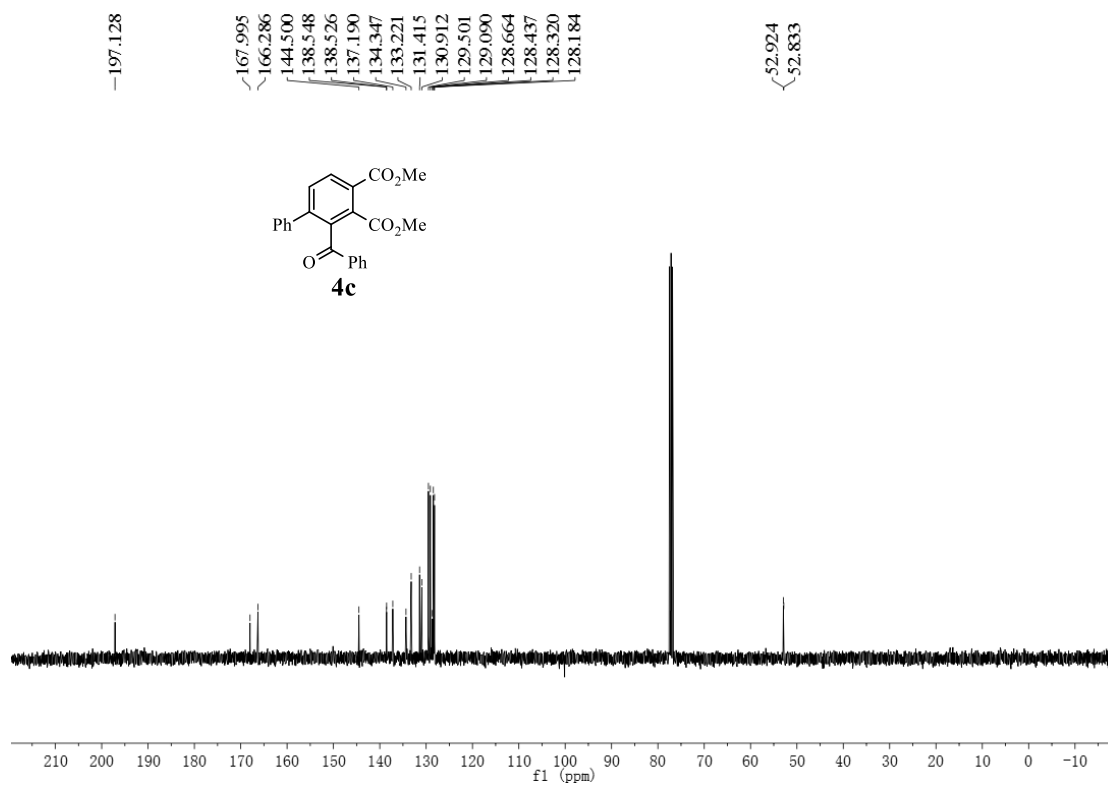

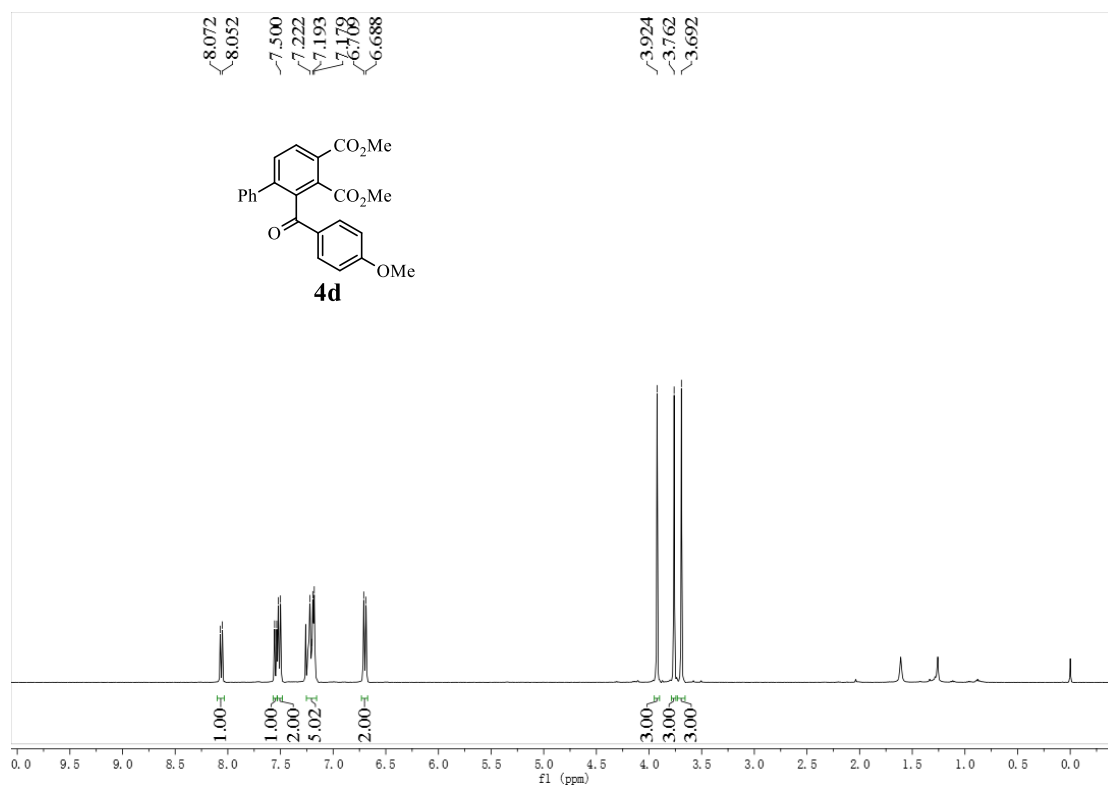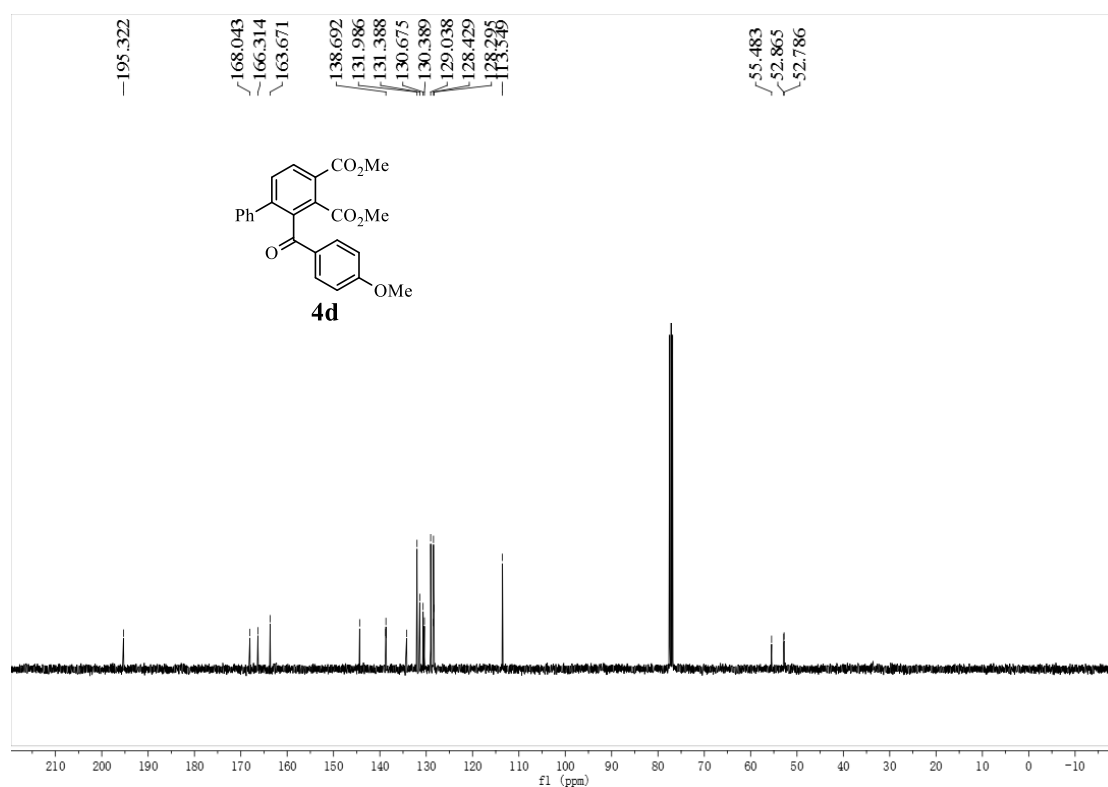

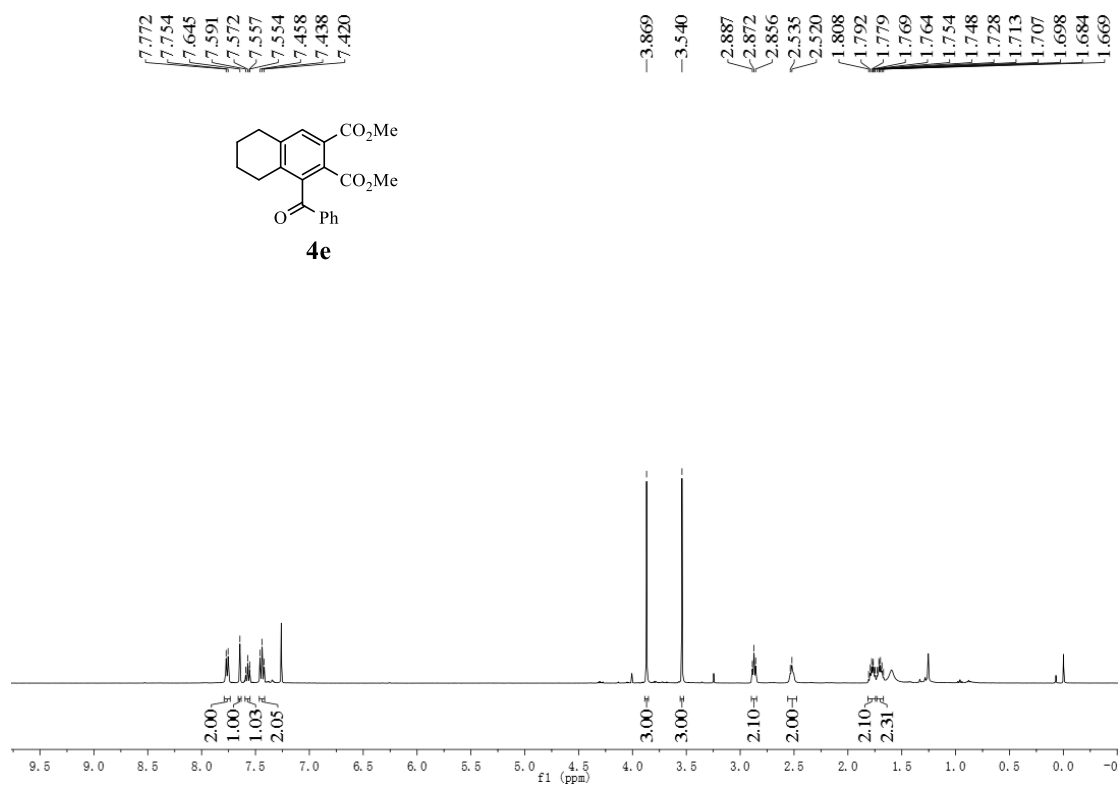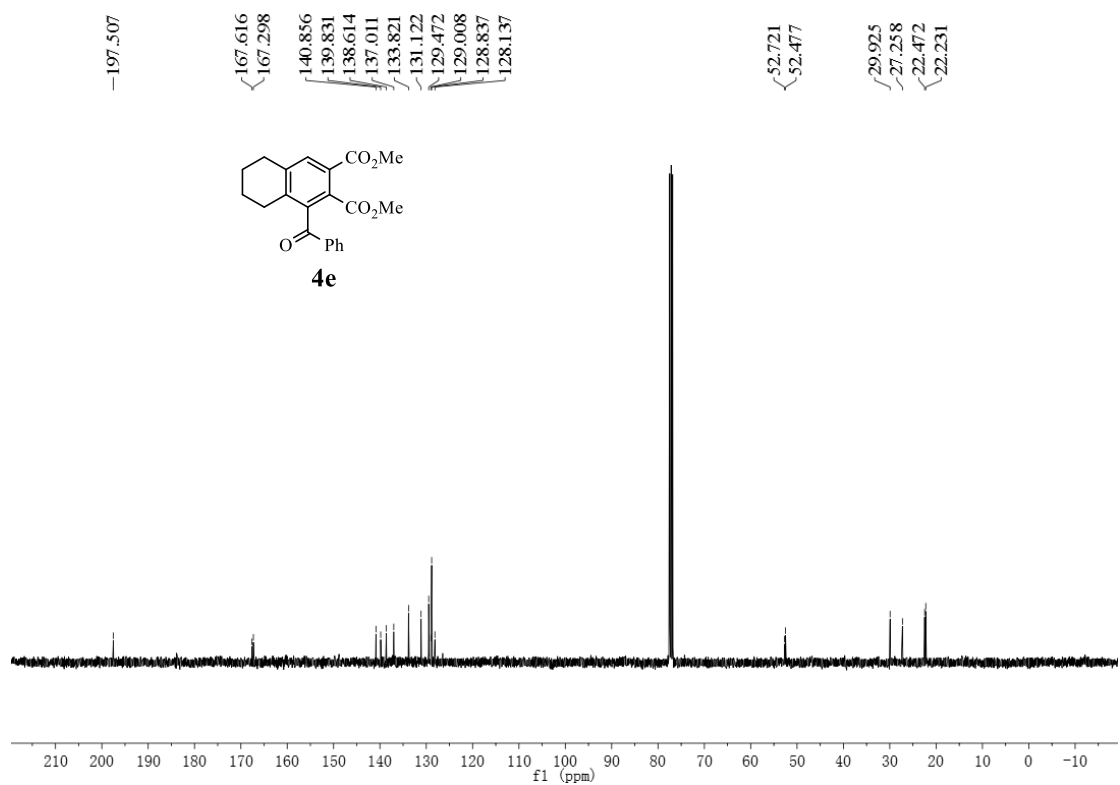

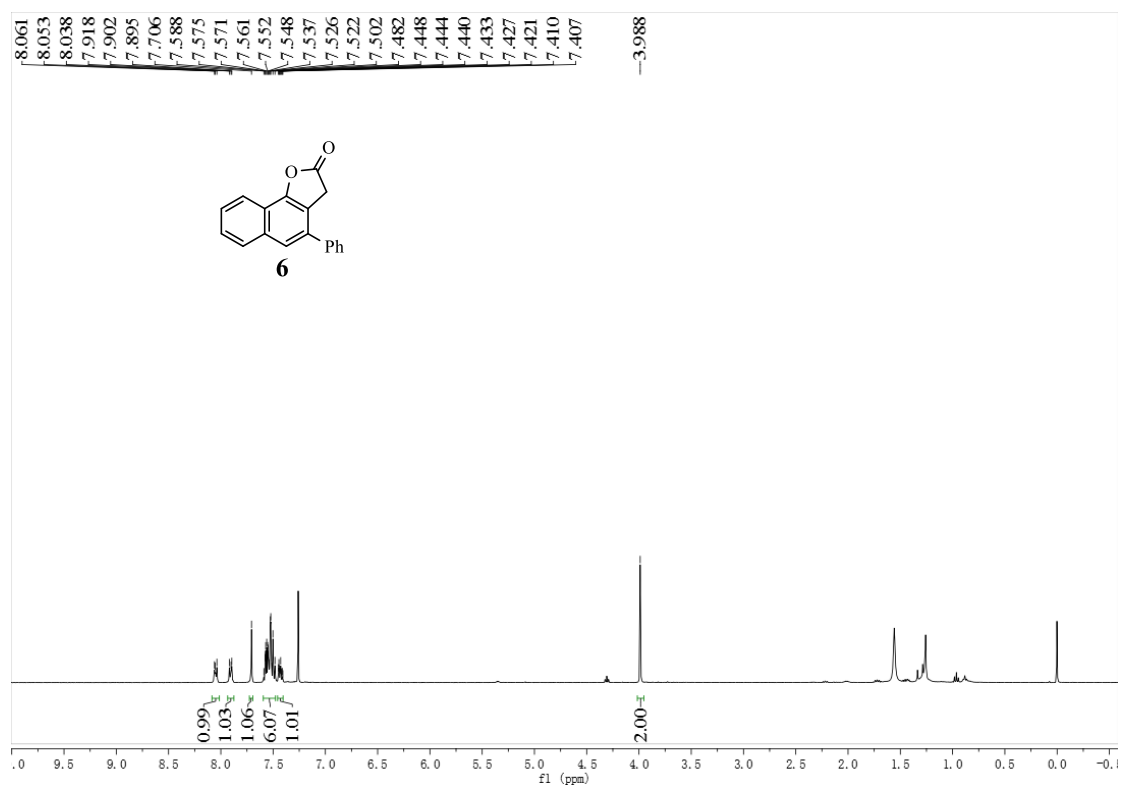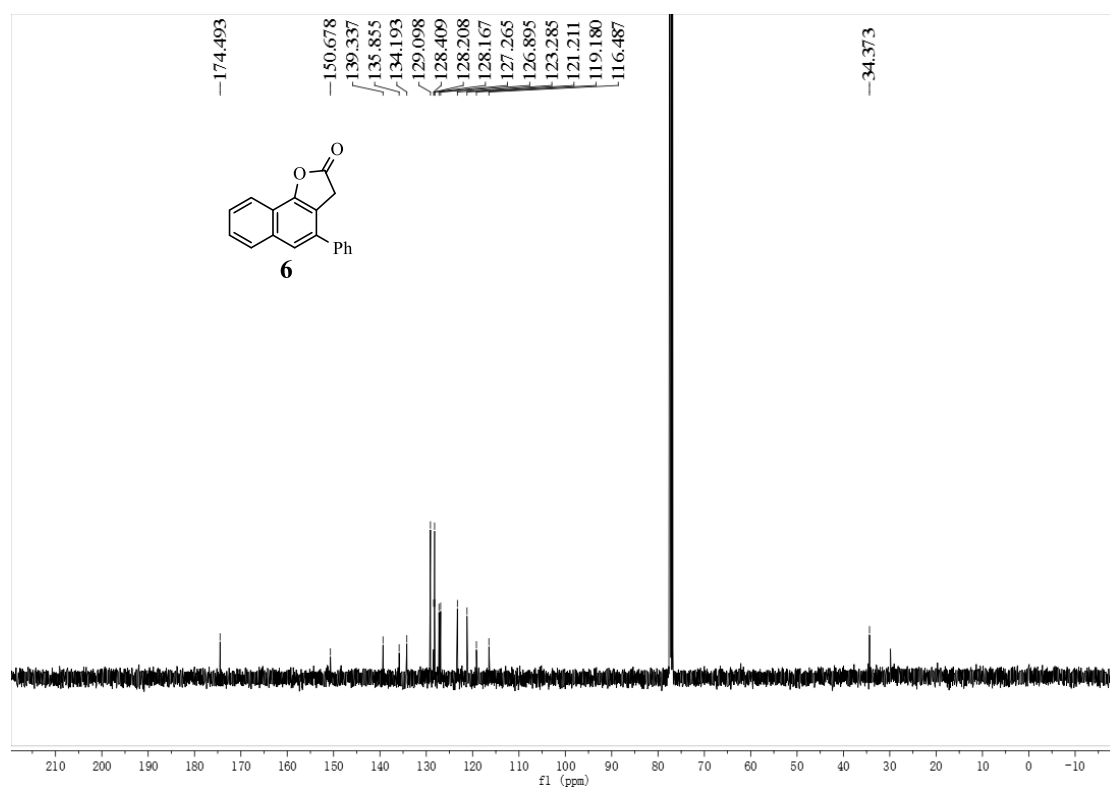

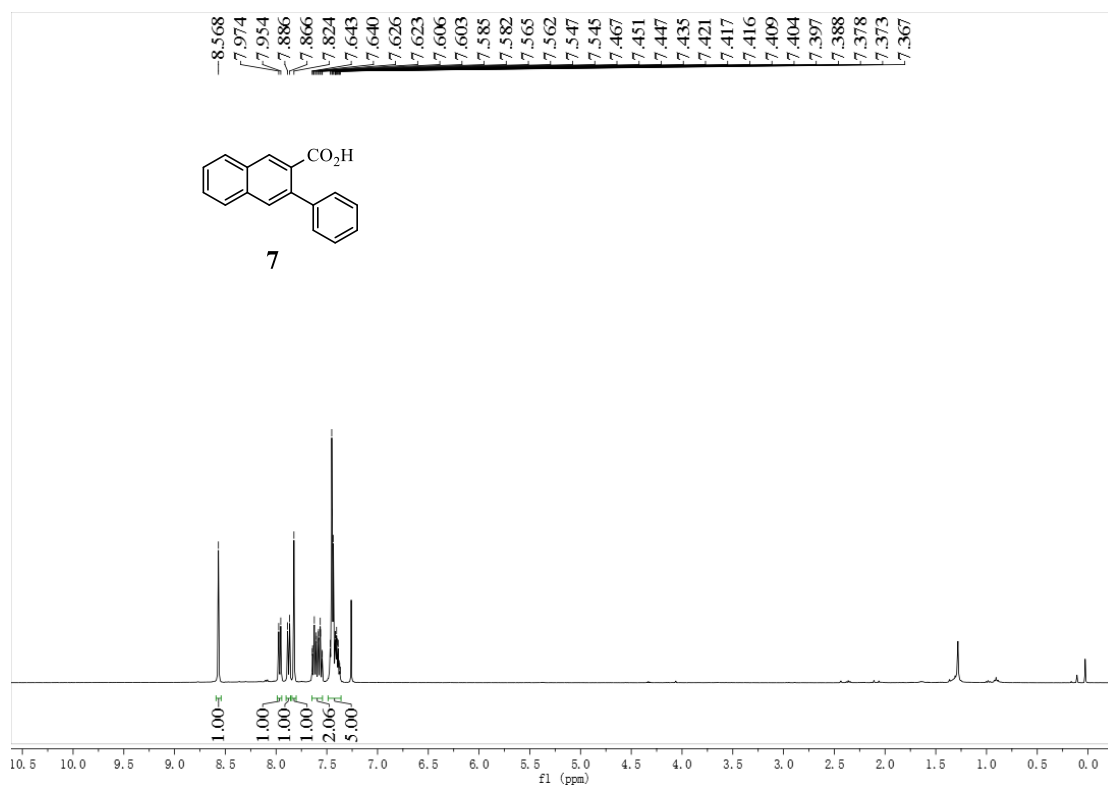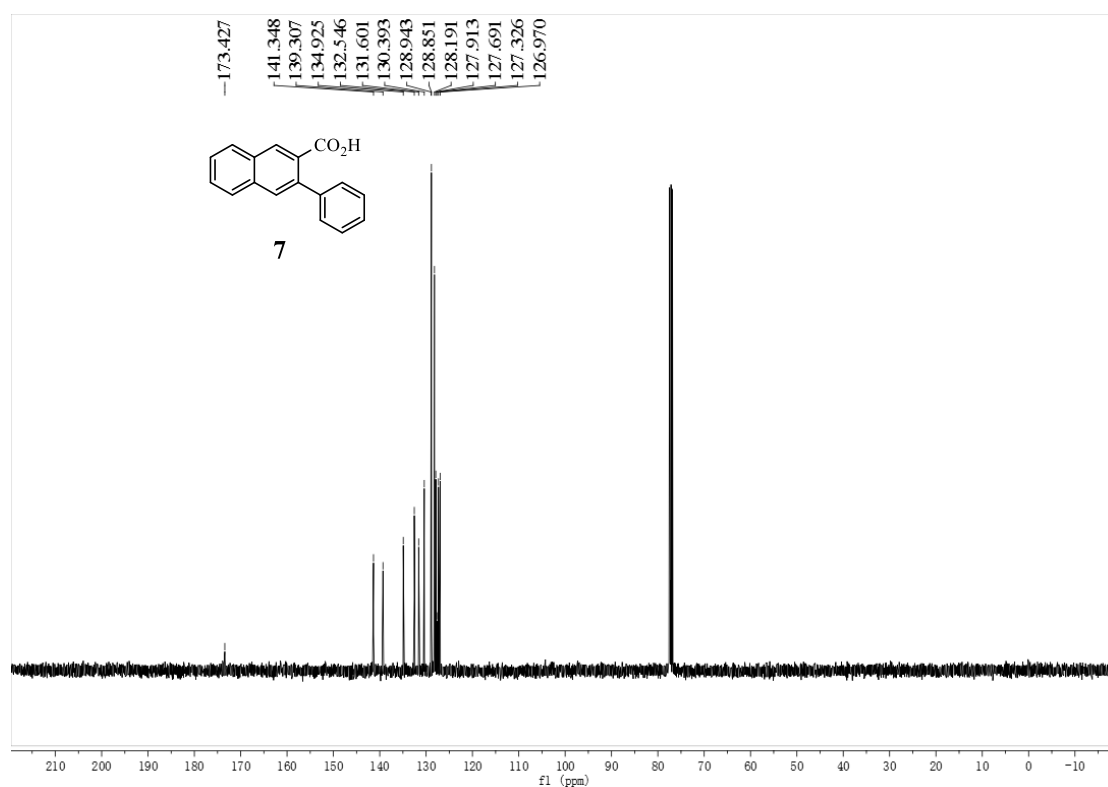



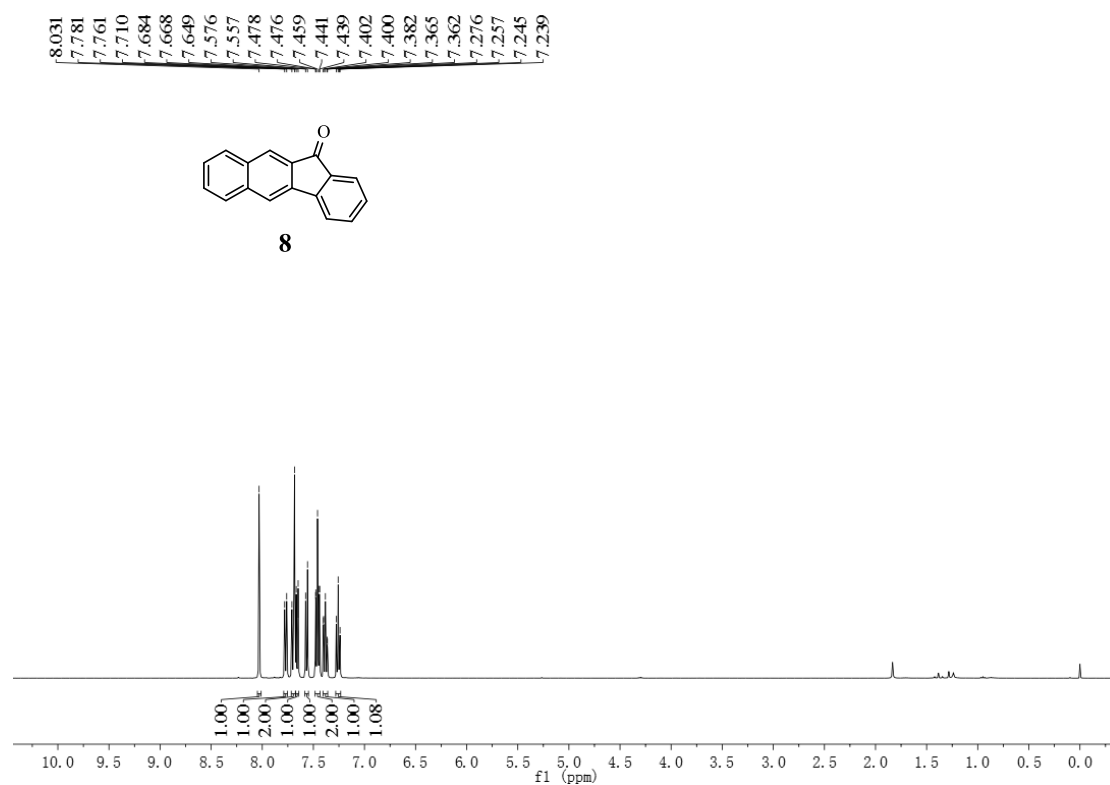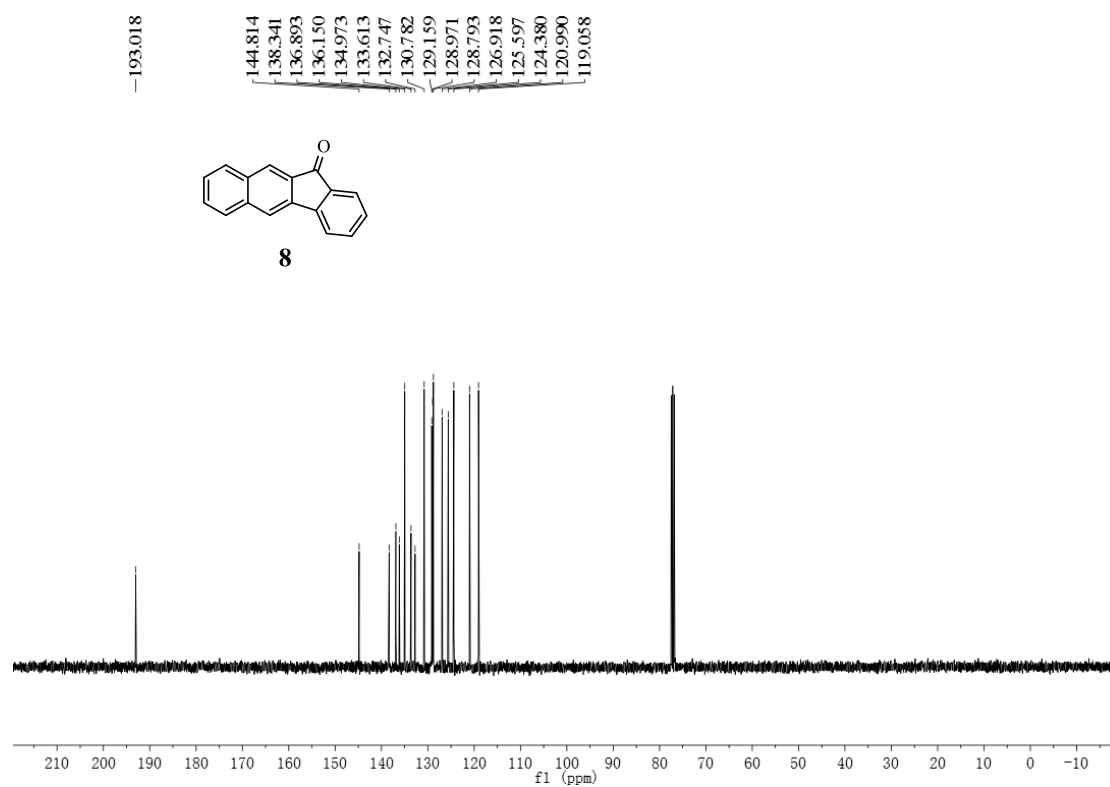

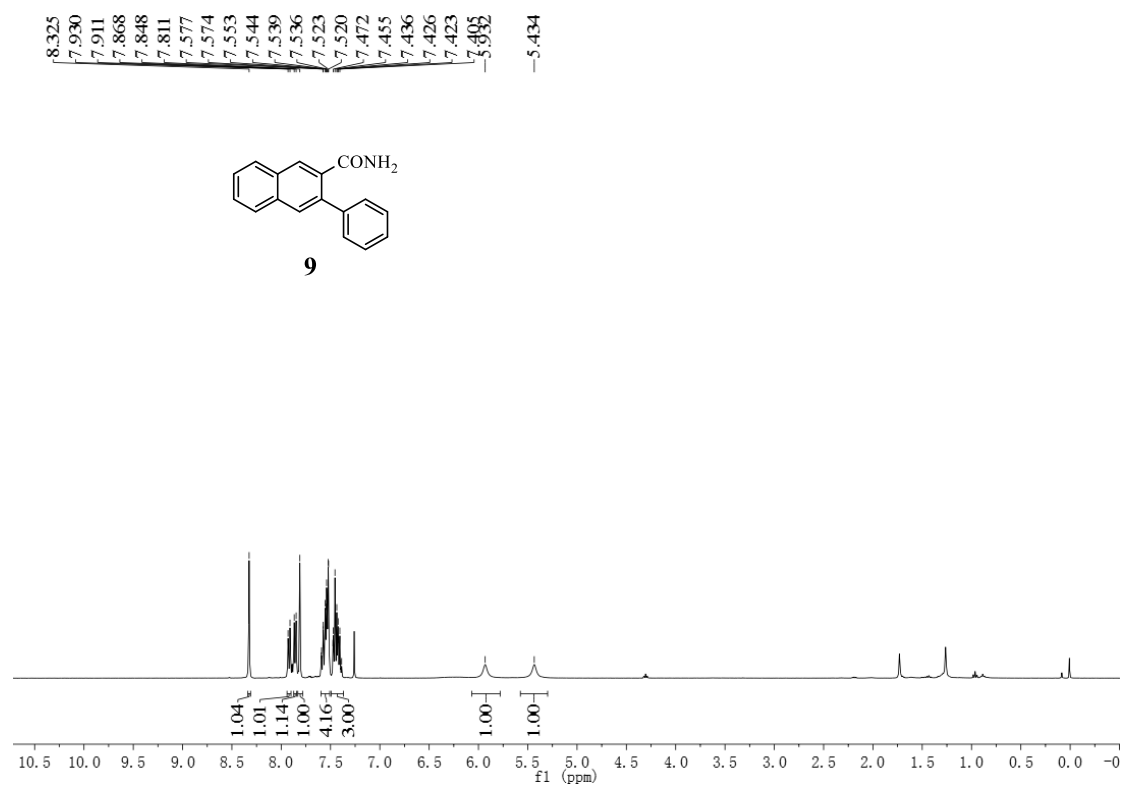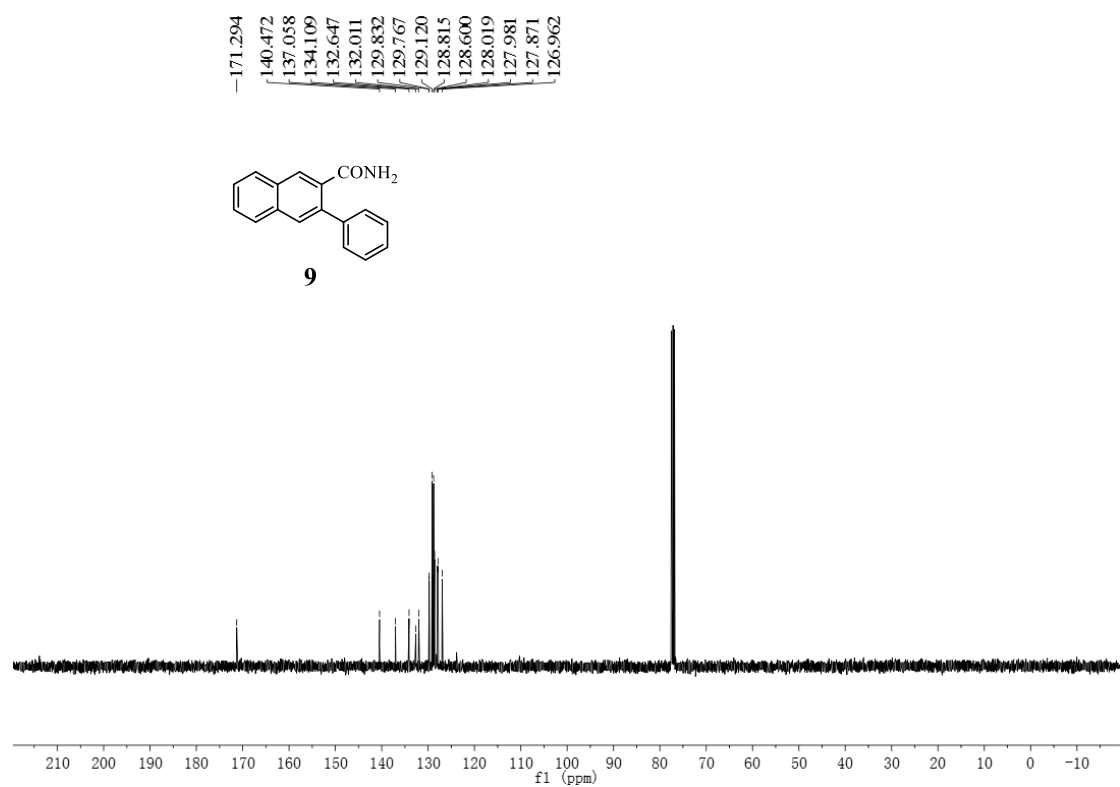

8.347  
7.932  
7.925  
7.913  
7.904  
7.893  
7.683  
7.680  
7.666  
7.663  
7.645  
7.643  
7.624  
7.621  
7.603  
7.601  
7.586  
7.584  
7.551  
7.548  
7.543  
7.530  
7.526  
7.511  
7.493  
7.490  
7.487  
7.478  
7.472  
7.465  
7.457  
7.454  
7.451

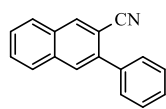

10

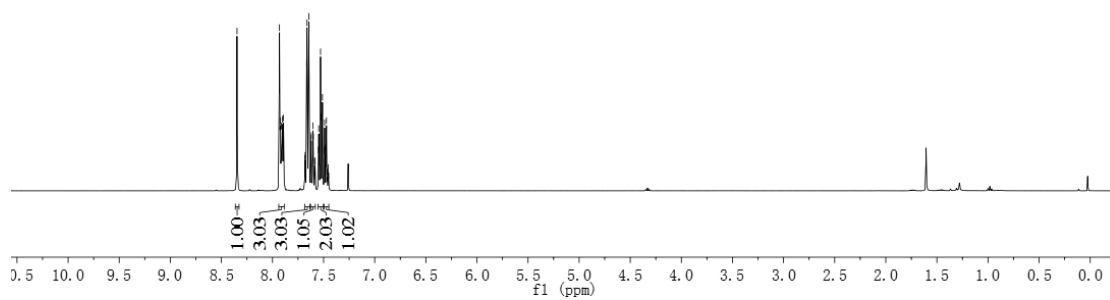

139.772  
138.399  
136.014  
134.876  
131.324  
129.507  
129.237  
129.149  
128.803  
128.589  
128.230  
128.149  
127.628  
118.997  
109.653

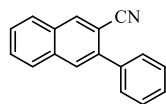

10

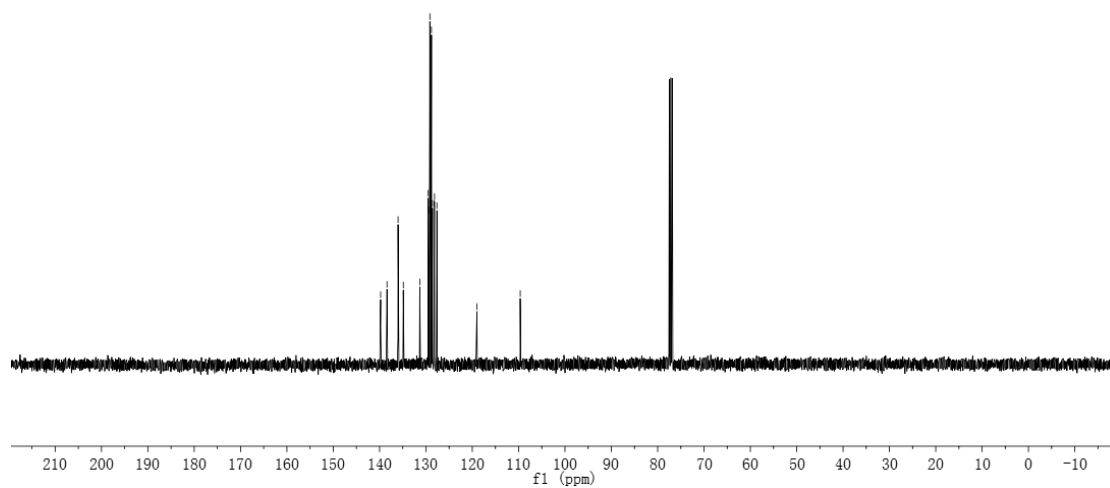

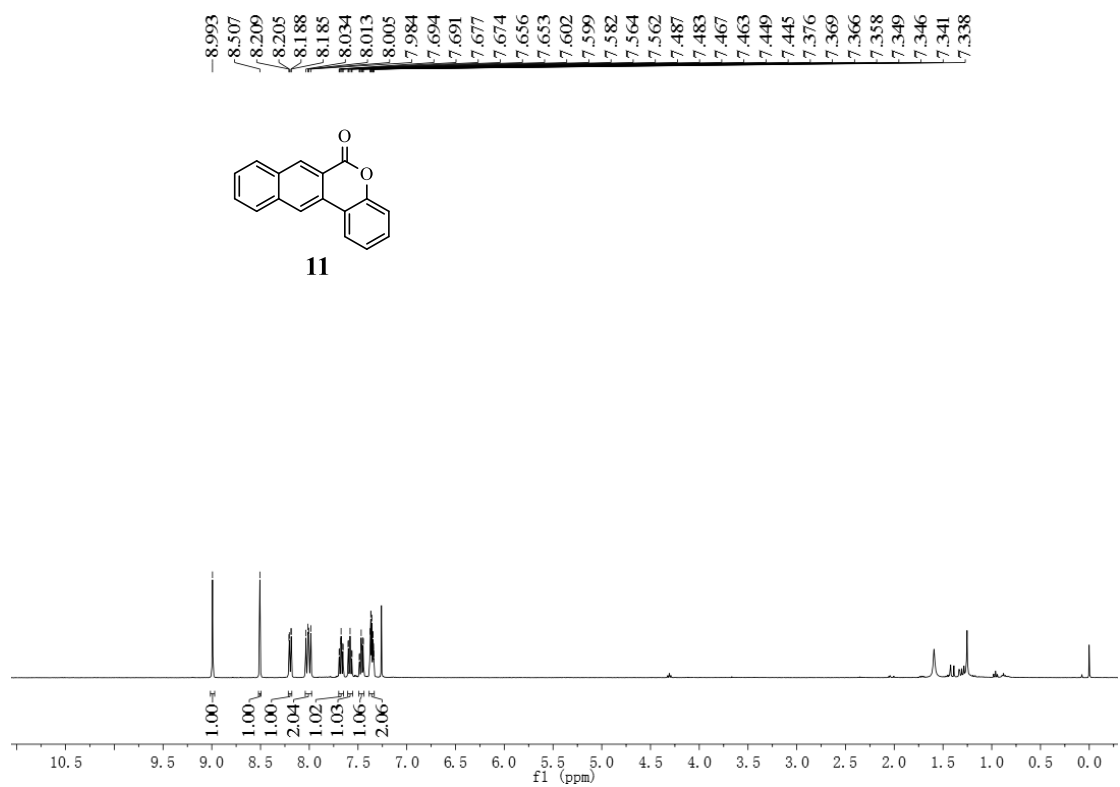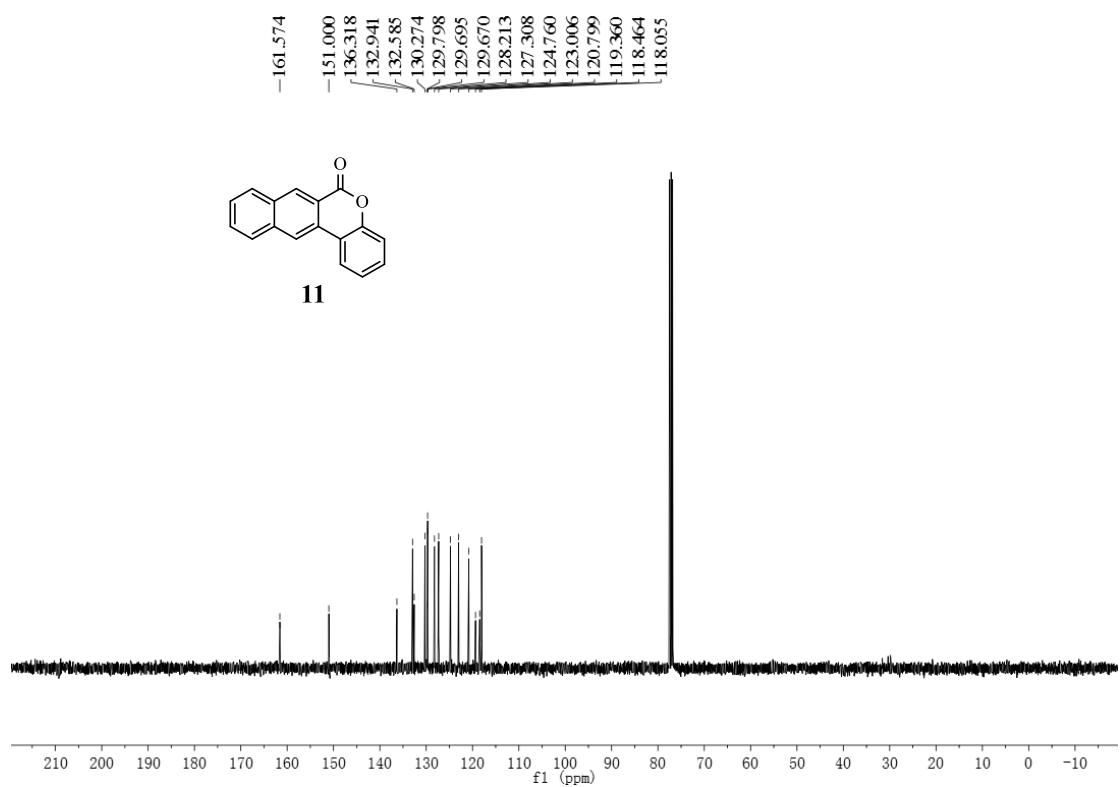

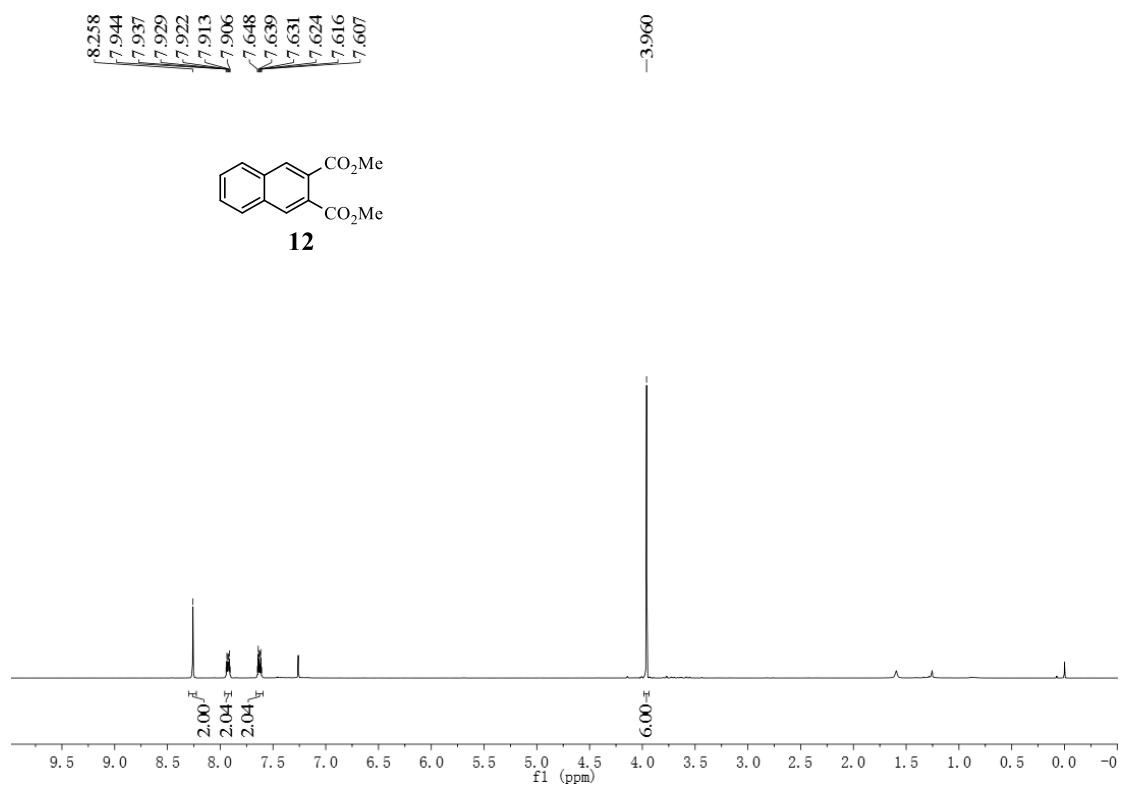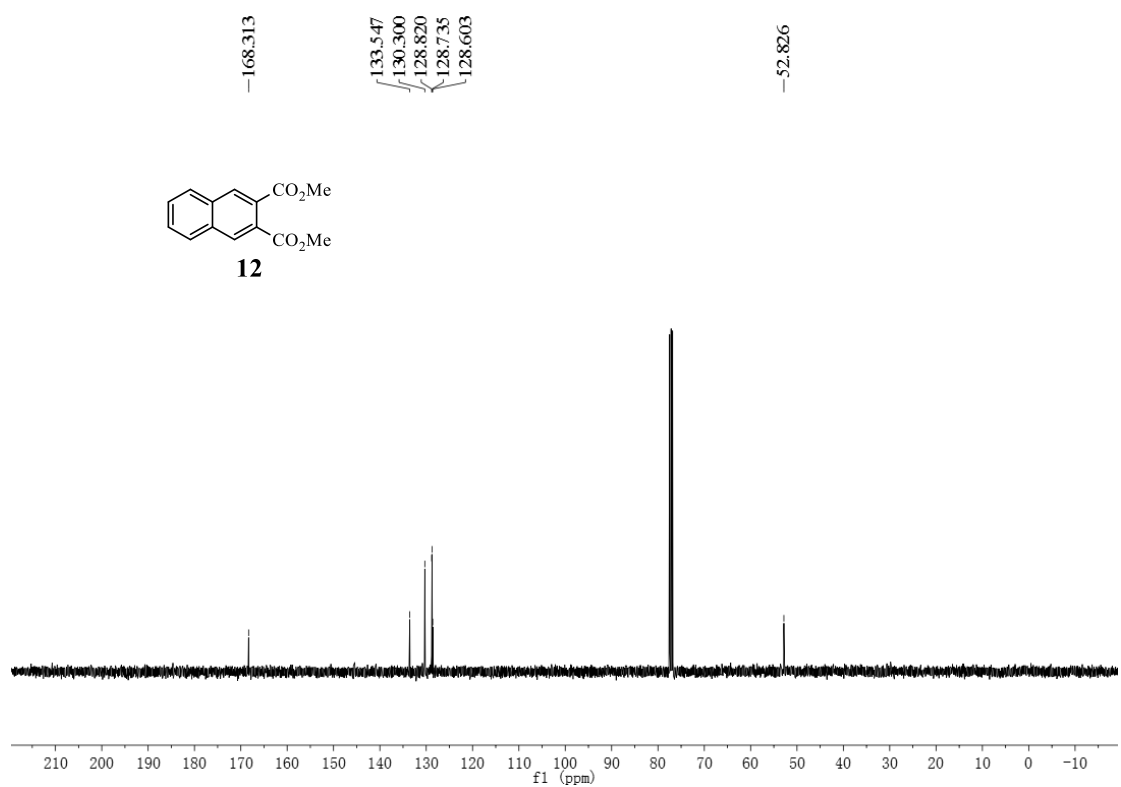

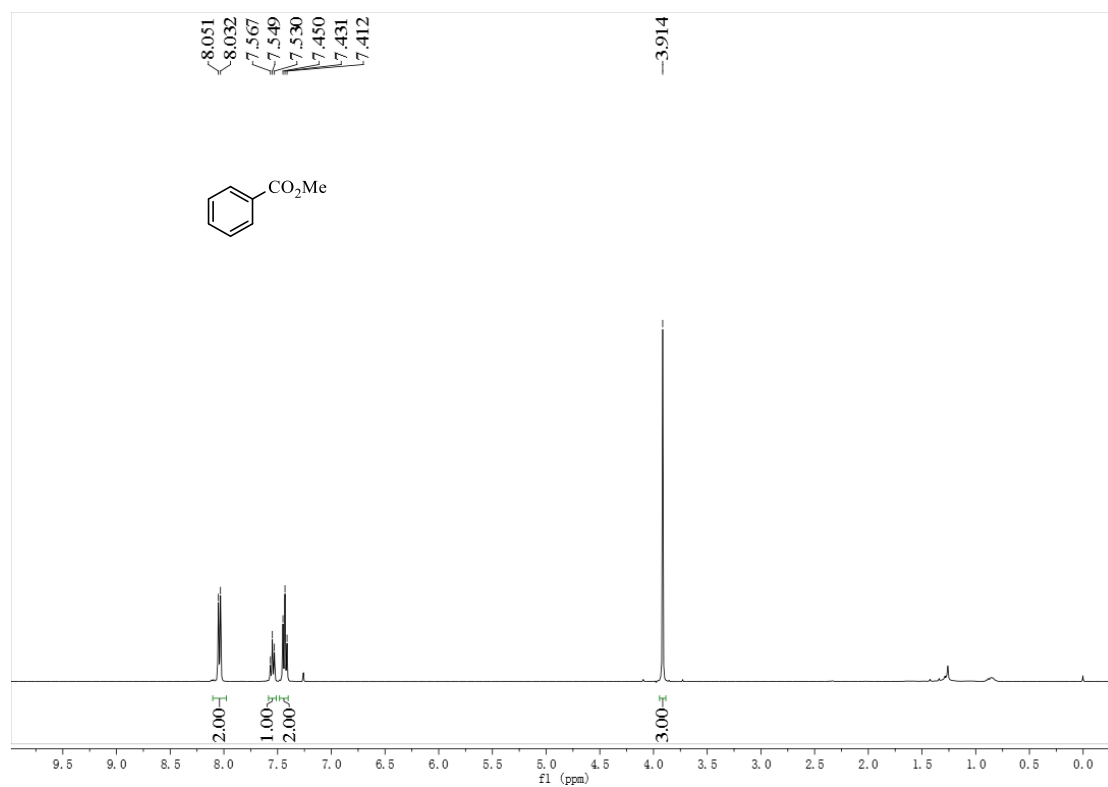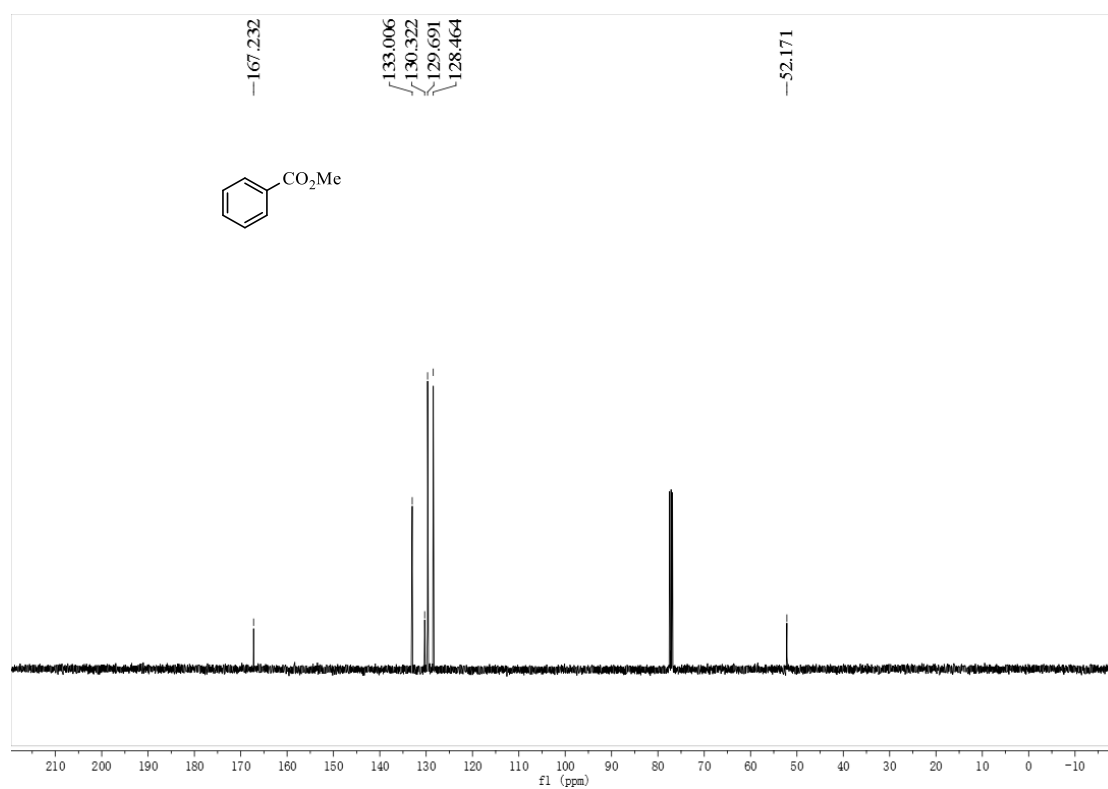

Supplement: Supplementary file 1 [file 9547546]
